# Supplementary material for: Convergent Evolution of Cysteine-Rich Keratins in Hard Skin Appendages of Terrestrial Vertebrates
Source: PubMed Central journal article supplement (PMC7086170; doi:10.1093/molbev/msz279), 2019-12-10
Supplement: msz279_supplementary_data.pdf [file msz279_supplementary_data.pdf]

## **Supplementary Data: Supplementary Tables and Figures**

### **Convergent evolution of cysteine-rich keratins in hard skin appendages of terrestrial vertebrates**

Florian Ehrlich, Julia Lachner, Marcela Hermann, Erwin Tschachler, Leopold Eckhart

#### **Content**

Supplementary Tables S1-S14

Supplementary Figures S1-S14

Supplementary Table S1. Keratin genes of the chicken (*Gallus gallus*)

| Keratin type | Name <sup>1</sup> | Genomic DNA sequence | Gene start <sup>2</sup> | Gene end <sup>2</sup> | Gene name (GenBank) | Gene (GenBank ID) | Protein <sup>3</sup> (acc. nr.)        | Differences between new gene prediction and GenBank (GCF_000002315.5) <sup>4</sup>                                   |
|--------------|-------------------|----------------------|-------------------------|-----------------------|---------------------|-------------------|----------------------------------------|----------------------------------------------------------------------------------------------------------------------|
|              |                   | (acc. nr.)           | (nucl. nr.)             | (nucl. nr.)           |                     |                   |                                        |                                                                                                                      |
| type I       | K222              | NC_006114.5          | 7326273                 | 7321193               | KRT222              | 420046            | NP_001182406.1                         |                                                                                                                      |
| type I       | K12               | NC_006114.5          | 7335707                 | 7329801               | n.a.                | n.a.              | n.a.                                   |                                                                                                                      |
| type I       | K20               | NC_006114.5          | 7340108                 | 7336399               | KRT40               | 420045            | NP_001264910.1                         |                                                                                                                      |
| type I       | K23               | NC_006114.5          | 7359178                 | 7349963               | KRT23               | 420044            | XP_418167.4                            |                                                                                                                      |
| type I       | K15               | NC_006114.5          | 7366321                 | 7362226               | KRT15               | 408040            | NP_001001312.2                         |                                                                                                                      |
| type I       | K19               | NC_006114.5          | 7373828                 | 7369522               | KRT19               | 395861            | NP_990340.2                            |                                                                                                                      |
| type I       | K9L1              | NC_006114.5          | 7384221                 | 7380438               | LOC100857659        | 100857659         | XP_003642867.2                         | GenBank gene prediction comprises 2 coding sequences                                                                 |
| type I       | K9L2              | NC_006114.5          | 7391904                 | 7388878               | LOC100857659        | 100857659         | XP_004948661.2                         | GenBank gene prediction comprises 2 coding sequences                                                                 |
| type I       | K9L3              | NC_006114.5          | 7398958                 | 7394346               | KRT10               | 771977            | XP_001235182.3                         |                                                                                                                      |
| type I       | K9L4              | NC_006114.5          | 7409440                 | 7405257               | KRT9L               | 420041            | XP_418163.4                            |                                                                                                                      |
| type I       | HAS1 (K9LC1)      | NC_006114.5          | 7417651                 | 7413171               | LOC772080           | 772080            | XP_001233972.1                         |                                                                                                                      |
| type I       | HAS2 (K9LC2)      | NC_006114.5          | 7426921                 | 7422075               | KRTC42L             | 420039            | XP_418162.6                            |                                                                                                                      |
| type I       | HAS3 (K9LC3)      | NC_006114.5          | 7434663                 | 7432253               | LOC771995           | 771995            | XP_003642868.1                         |                                                                                                                      |
| type I       | K14L1             | NC_006114.5          | 7442528                 | 7438886               | KRT14               | 408039            | NP_001001311.2                         |                                                                                                                      |
| type I       | K14L2             | NC_006114.5          | 7449377                 | 7445505               | KRT17               | 100858439         | NP_001264913.1                         |                                                                                                                      |
| type I       | K18               | NC_008465.4          | 5401187                 | 5408382               | KRT18               | 101749333         | XP_025001434.1                         |                                                                                                                      |
| type II      | K80               | NC_008465.4          | 5202555                 | 5188564               | KRT80               | 431302            | XP_428853.4                            |                                                                                                                      |
| type II      | K7                | NC_008465.4          | 5216450                 | 5224940               | KRT7                | 395772            | NP_990263.1                            |                                                                                                                      |
| type II      | K84L              | NC_008465.4          | 5233503                 | 5230255               | LOC426897           | 426897            | XP_015155864.2                         |                                                                                                                      |
| type II      | K5L3              | NC_008465.4          | 5245539                 | 5241947               | KRT75               | 408042            | NP_001001314.2                         |                                                                                                                      |
| type II      | K5L2              | NC_008465.4          | 5254375                 | 5249671               | KRT6A               | 408041            | NP_001001313.2                         |                                                                                                                      |
| type II      | K5L1              | NC_008465.4          | 5267020                 | 5260881               | KRT5                | 407779            | NP_001001195.1                         |                                                                                                                      |
| type II      | HBS1 (K78LC1)     | NC_008465.4          | 5287405                 | 5280968               | KRT75L4             | 100858302         | XP_015155859.1                         |                                                                                                                      |
| type II      | HBS2 (K78LC2)     | NC_008465.4          | 5305881                 | 5300187               | LOC768978           | 768978            | XP_015155862.1                         |                                                                                                                      |
| type II      | HBS3 (K78LC3)     | NC_008465.4          | 5316137                 | 5311299               | LOC107055419        | 107055419         | XP_025001374.1                         |                                                                                                                      |
| type II      | K78LT             | NC_008465.4          | 5335060                 | 5322171               | LOC431300           | 431300            | partially identical:<br>XP_025001353.1 | Prediction is uncertain, multiple frame-shift mutations, hypothetical amino acid sequence is shown in Suppl. Fig. S1 |
| type II      | K78L4             | NC_008465.4          | 5351881                 | 5348560               | KRT75L2             | 431299            | XP_428850.2                            |                                                                                                                      |
| type II      | K78L3             | NC_008465.4          | 5360226                 | 5356373               | KRT71               | 768881            | XP_001232027.4                         |                                                                                                                      |
| type II      | K78L2             | NC_008465.4          | 5369524                 | 5365170               | KRT75L1             | 768880            | XP_015155860.1                         |                                                                                                                      |
| type II      | K78L1             | NC_008465.4          | 5379290                 | 5374907               | LOC112529929        | 112529929         | XP_001231586.2                         |                                                                                                                      |
| type II      | K8                | NC_008465.4          | 5396641                 | 5388108               | KRT8                | 426896            | XP_015128103.2                         |                                                                                                                      |

Notes: <sup>1</sup> Keratins were named according to orthology to human proteins. K9-like cysteine-rich keratins (K9LC) are termed HAS and K78-like cysteine-rich keratins (K78LC) are termed HBS keratins. HAS, hard acidic sauropsid-specific; HBS, hard basic sauropsid-specific; L, like; LT, long tail.

<sup>2</sup> Gene start and end indicate the start and stop codon of the coding sequence. Introns are not indicated.

<sup>3</sup> Accession numbers (acc. nr.) of protein amino acid sequences predicted in GenBank.

<sup>4</sup> Genome sequence assembly: GRCg6a (GCF\_000002315.5).

acc., accession; n.a., not available in the genome sequence assembly; nucl., nucleotide; nr., number.

Supplementary Table S2. Keratin genes of the Chinese alligator (*Alligator sinensis*)

| Keratin type | Name <sup>1</sup> | Genomic DNA sequence<br>(acc. nr.) | Gene start <sup>2</sup> | Gene end <sup>2</sup> | Gene name<br>(GenBank) | Gene<br>(GenBank ID) | Protein <sup>3</sup><br>(acc. nr.) | Differences between new gene prediction and GenBank<br>(GCF_000455745.1) <sup>4</sup>                                                                                                   |
|--------------|-------------------|------------------------------------|-------------------------|-----------------------|------------------------|----------------------|------------------------------------|-----------------------------------------------------------------------------------------------------------------------------------------------------------------------------------------|
|              |                   |                                    | (nucl. nr.)             | (nucl. nr.)           |                        |                      |                                    |                                                                                                                                                                                         |
| type I       | K222              | NW_005842040.1                     | 395100                  | 404167                | KRT222                 | 102385505            | XP_006022588.2                     |                                                                                                                                                                                         |
| type I       | K24               | NW_005842040.1                     | 366765                  | 376063                | LOC102378366           | 102378366            | XP_025058718.1                     |                                                                                                                                                                                         |
| type I       | K10L              | NW_005842040.1                     | 335322                  | 345003                | LOC102378129           | 102378129            | XP_025058719.1                     | Corrected exon 1: start at nucl. 335322                                                                                                                                                 |
| type I       | K12               | NW_005842040.1                     | 303666                  | 309983                | LOC102377886           | 102377886            | XP_006022639.1                     |                                                                                                                                                                                         |
| type I       | K20               | NW_005842040.1                     | 275299                  | 289066                | KRT20                  | 102385271            | XP_006022587.1                     |                                                                                                                                                                                         |
| type I       | K23               | NW_005842040.1                     | 178687                  | 214213                | LOC102377411           | 102377411            | XP_006022637.2                     |                                                                                                                                                                                         |
| type I       | K36L1             | NW_005842040.1                     | 127867                  | 137534                | LOC102377177           | 102377177            | XP_006022636.1                     | Exon 1: start at nucl. 6043 relative to GenBank prediction; end of exon 6                                                                                                               |
| type I       | K36L2             | NW_005842040.1                     | 116254                  | 122570                | LOC102376945           | 102376945            | XP_006022635.2                     | Corrected exon 1: starts at nucl 116254, exon 7 with premature stop codon                                                                                                               |
| type I       | K36L3             | NW_005842040.1                     | 100211                  | 104304                | LOC102376692           | 102376692            | XP_025058710.1                     |                                                                                                                                                                                         |
| type I       | K15L              | NW_005842040.1                     | 76246                   | 84026                 | LOC102385021           | 102385021            | XP_006022586.1                     |                                                                                                                                                                                         |
| type I       | K19               | NW_005842040.1                     | 62672                   | 69119                 | LOC102384765           | 102384765            | XP_006022585.1                     |                                                                                                                                                                                         |
| type I       |                   | NW_005842040.1                     |                         |                       |                        |                      |                                    |                                                                                                                                                                                         |
| type I       | K9L1              | NW_005842040.1                     | 30264                   | 35981                 | LOC102384514           | 102384514            | XP_006022584.1                     |                                                                                                                                                                                         |
| type I       | K9L               | NW_005842040.1                     | 3318                    | 14074                 | LOC102376455           | 102376455            | XP_025058716.1                     | Incomplete start, inactivating mutation: frame shift at nucl. 11877                                                                                                                     |
| type I       | K9L2              | NW_005843869.1                     | 11069                   | 17220                 | LOC102379508           | 102379508            | XP_006039283.2                     |                                                                                                                                                                                         |
| type I       | K9L3              | NW_005842585.1                     | 1032077                 | 1036258               | LOC102369678           | 102369678            | XP_006032846.1                     |                                                                                                                                                                                         |
| type I       | K9L4              | NW_005842585.1                     | 1012386                 | 1018971               | LOC102373165           | 102373165            | XP_025070308.1                     |                                                                                                                                                                                         |
| type I       | K9L5              | NW_005842585.1                     | 985187                  | 992565                | LOC102369323           | 102369323            | XP_025070304.1                     |                                                                                                                                                                                         |
| type I       | HAS1 (K9LC1)      | NW_005842585.1                     | 947406                  | 954479                | LOC102368806           | 102368806            | XP_006032843.1                     |                                                                                                                                                                                         |
| type I       | HAS2 (K9LC2)      | NW_005842585.1                     | 925915                  | 931931                | LOC102369067           | 102369067            | XP_006032844.1                     |                                                                                                                                                                                         |
| type I       | K14L1             | NW_005842585.1                     | 878298                  | 886416                | LOC102368390           | 102368390            | XP_006032841.1                     |                                                                                                                                                                                         |
| type I       | K14L2             | NW_005842585.1                     | 864255                  | 870926                | LOC102367973           | 102367973            | XP_006032839.1                     |                                                                                                                                                                                         |
| type I       | K117              | NW_005842585.1                     | 819205                  | 826538                | LOC102372666           | 102372666            | XP_025070287.1                     |                                                                                                                                                                                         |
| type I       | K18               | NW_005842452.1                     | 1162577                 | 1158980               | KRT18                  | 102375632            | XP_006030669.1                     |                                                                                                                                                                                         |
| type II      | K80               | NW_005842526.1                     | 782023                  | 782023                | KRT80                  | 102371067            | XP_006031790.2                     |                                                                                                                                                                                         |
| type II      | K7                | NW_005842526.1                     | 829141                  | 829141                | LOC102371330           | 102371330            | XP_006031791.1                     |                                                                                                                                                                                         |
| type II      | K84L1             | NW_005842526.1                     | 845249                  | 845249                | LOC102377597           | 102377597            | XP_006031815.1                     |                                                                                                                                                                                         |
| type II      | K84L2             | NW_005842526.1                     | 860922                  | 860922                | LOC102377836           | 102377836            | XP_025069161.1                     | Last exon with sequence gap, corrected to 860920..861200                                                                                                                                |
| type II      | K5L4              | NW_005842526.1                     | 870439                  | 870439                | LOC102371761           | 102371761            | XP_006031793.1                     |                                                                                                                                                                                         |
| type II      | K5L3              | NW_005842526.1                     | 893670                  | 893670                | LOC102372247           | 102372247            | XP_006031794.2                     | This GenBank gene prediction combines 2 coding sequences. Besides the gene indicated here, another gene starts at nucl. 888065, frame shift: nucl. 887772, premature stop: nucl. 887601 |
| type II      |                   |                                    |                         |                       |                        |                      |                                    |                                                                                                                                                                                         |
| type II      | K5L2              | NW_005842526.1                     | 919981                  | 919981                | LOC102372665           | 102372665            | XP_006031796.1                     |                                                                                                                                                                                         |
| type II      | K5L1              | NW_005842526.1                     | 935435                  | 935435                | LOC102378082           | 102378082            | XP_006031817.1                     |                                                                                                                                                                                         |
| type II      | HBS1 (K78LC1)     | NW_005842526.1                     | 955663                  | 955663                | LOC102373417           | 102373417            | XP_006031800.1                     |                                                                                                                                                                                         |
| type II      | HBS2 (K78LC2)     | NW_005842526.1                     | 977316                  | 977316                | LOC102378317           | 102378317            | XP_025069184.1                     |                                                                                                                                                                                         |
| type II      | HBS3              | NW_005842526.1                     | 992203                  | 992203                | LOC102378551           | 102378551            | XP_025069194.1                     |                                                                                                                                                                                         |
| type II      | K78LT             | NW_005842526.1                     | 1027861                 | 1027861               | LOC102373665           | 102373665            | XP_006031801.1                     | Predicted exon 7: 1031791..1032015, predicted exon 8: 1031021..1031049, exon 9: 1027860..1030907 then frameshift                                                                        |
| type II      |                   |                                    |                         |                       |                        |                      |                                    |                                                                                                                                                                                         |
| type II      | K78L6             | NW_005842526.1                     | 1060335                 | 1060335               | LOC102374427           | 102374427            | XP_014379207.1                     | Predicted exon 7: 1120942..1121156, exon 8: 1120411..1120445                                                                                                                            |
| type II      | K78L5             | NW_005842526.1                     | 1089374                 | 1089374               | LOC102379545           | 102379545            | XP_025069173.1                     |                                                                                                                                                                                         |
| type II      | K78L4             | NW_005842526.1                     | 1105253                 | 1105253               | LOC102380041           | 102380041            | XP_014379196.1                     |                                                                                                                                                                                         |
| type II      | K78L3             | NW_005842452.1                     | 1279629                 | >1284625              | LOC102380269           | 102380269            | XP_006030688.1                     | Incomplete, exon 6 ends at nucl. 1284625, exons 7 and 8 are missing because of a gap in the genome sequence                                                                             |
| type II      |                   |                                    |                         |                       |                        |                      |                                    |                                                                                                                                                                                         |
| type II      | K78L2             | NW_005842452.1                     | 1260757                 | 1265945               | LOC102380036           | 102380036            | XP_014378646.1                     |                                                                                                                                                                                         |
| type II      | K78L1             | NW_005842452.1                     | 1250240                 | 1256757               | LOC106722579           | 106722579            | XP_014378640.1                     |                                                                                                                                                                                         |
| type II      | K8L               | NW_005842452.1                     | 1201934                 | 1209453               | LOC102379785           | 102379785            | XP_006030686.1                     |                                                                                                                                                                                         |
| type II      | K8                | NW_005842452.1                     | 1183482                 | 1192777               | KRT8                   | 102375882            | XP_006030670.1                     |                                                                                                                                                                                         |

Notes: <sup>1</sup> Keratins were named according to orthology to human proteins. K9-like cysteine-rich keratins (K9LC) are termed HAS and K78-like cysteine-rich keratins (K78LC) are termed HBS keratins.

HAS, hard acidic sauropsid-specific; HBS, hard basic sauropsid-specific; L, like; LT, long tail.

<sup>2</sup> Gene start and end indicate the start and stop codon of the coding sequence. Introns are not indicated.

<sup>3</sup> Accession numbers (acc. nr.) of protein amino acid sequences predicted in GenBank.

<sup>4</sup> Genome assembly: ASM45574v1 (GCF\_000455745.1).

acc., accession; n.a., not available in the genome sequence assembly; nucl., nucleotide; nr., number.

Supplementary Table S3. Keratin genes of the turtle (*Chrysemys picta bellii*)

| Keratin type | Name <sup>1</sup> | Genomic DNA sequence<br>(acc. nr.) | Gene start <sup>2</sup> | Gene end <sup>2</sup> | Gene name<br>(GenBank) | Gene<br>(GenBank ID) | Protein <sup>3</sup><br>(acc. nr.) | Differences between new gene prediction and GenBank<br>(GCF_000241765.3) <sup>4</sup>                                                                                                          |
|--------------|-------------------|------------------------------------|-------------------------|-----------------------|------------------------|----------------------|------------------------------------|------------------------------------------------------------------------------------------------------------------------------------------------------------------------------------------------|
|              |                   |                                    | (nucl. nr.)             | (nucl. nr.)           |                        |                      |                                    |                                                                                                                                                                                                |
| type I       | K222              | NW_007359872.1                     | 6017079                 | 6007457               | KRT222                 | 101946940            | XP_023956555.1                     |                                                                                                                                                                                                |
| type I       | K24               | NW_007359872.1                     | 6026071                 | 6020015               | KRT24                  | 101946677            | XP_023956552.1                     |                                                                                                                                                                                                |
| type I       | K12               | NW_007359872.1                     | 6059837                 | 6053610               | LOC101946402           | 101946402            | XP_023956546.1                     |                                                                                                                                                                                                |
| type I       | K20               | NW_007359872.1                     | 6079302                 | 6066953               | KRT20                  | 101946118            | XP_023956553.1                     |                                                                                                                                                                                                |
| type I       | K23               | NW_007359872.1                     | 6118243                 | 6103446               | KRT23                  | 101944292            | XP_008160960.2                     |                                                                                                                                                                                                |
| type I       | K15               | NW_007359872.1                     | 6154671                 | 6144684               | LOC101944027           | 101944027            | XP_023956548.1                     |                                                                                                                                                                                                |
| type I       | K19               | NW_007359872.1                     | 6169782                 | 6164037               | LOC101945842           | 101945842            | XP_005294164.1                     | Prediction ends after intermediate filament domain                                                                                                                                             |
| type I       | K9L               | NW_007359872.1                     | 6203574                 | 6194703               | LOC101943762           | 101943762            | XP_023956544.1                     |                                                                                                                                                                                                |
| type I       | HAS1 (K9LC1)      | NW_007359872.1                     | 6239064                 | 6229334               | LOC101945565           | 101945565            | XP_023956574.1                     |                                                                                                                                                                                                |
| type I       | HAS2 (K9LC2)      | NW_007359872.1                     | >6251969                | 6247249               | LOC101943485           | 101943485            | XP_023956575.1                     | Incomplete, corrected exon 1 (starts in unsequenced region: nucl: >6251969), exon 6 (end at nucl: 6247238) is last exon of prediction, corrected exon 6: , exons 7 and 8 in unsequenced region |
| type I       | K14L1             | NW_007359872.1                     | 6284793                 | 6277519               | LOC101943211           | 101943211            | XP_023956549.1                     |                                                                                                                                                                                                |
| type I       | K14L2             | NW_007359872.1                     | 6296382                 | 6291231               | LOC112058843           | 112058843            | XP_023956551.1                     |                                                                                                                                                                                                |
| type I       | K117              | NW_007359872.1                     | 6333434                 | 6327757               | LOC101942920           | 101942920            | XP_023956554.1                     |                                                                                                                                                                                                |
| type I       | K18               | NW_007281365.1                     | 3188404                 | 3195817               | KRT18                  | 101944455            | XP_005291938.1                     |                                                                                                                                                                                                |
| type II      | K80               | NW_007281365.1                     | 2707507                 | 2683757               | KRT80                  | 101937727            | XP_005292004.1                     |                                                                                                                                                                                                |
| type II      | K7                | NW_007281365.1                     | 2731398                 | 2750824               | LOC101942365           | 101942365            | XP_005291931.1                     |                                                                                                                                                                                                |
| type II      | K84L              | NW_007281365.1                     | 2774533                 | 2760328               | LOC101942824           | 101942824            | XP_005291933.1                     |                                                                                                                                                                                                |
| type II      | K5L4              | NW_007281365.1                     | 2797015                 | 2782059               | LOC101943098           | 101943098            | XP_005291934.1                     |                                                                                                                                                                                                |
| type II      | K5L3              | NW_007281365.1                     | 2812964                 | 2806768               | LOC101943376           | 101943376            | XP_008167740.1                     |                                                                                                                                                                                                |
| type II      | K5L2              | NW_007281365.1                     | 2839118                 | 2828979               | LOC101943657           | 101943657            | XP_005291936.1                     |                                                                                                                                                                                                |
| type II      | K5L1              | NW_007281365.1                     | 2863680                 | 2855514               | LOC101938008           | 101938008            | XP_008167741.1                     |                                                                                                                                                                                                |
| type II      | HBS1 (K78LC1)     | NW_007281365.1                     | 2897943                 | 2888267               | LOC101938278           | 101938278            | XP_023962088.1                     |                                                                                                                                                                                                |
| type II      | HBS2 (K78LC2)     | NW_007281365.1                     | 2934586                 | 2926151               | LOC101938554           | 101938554            | XP_023962089.1                     |                                                                                                                                                                                                |
| type II      | K78L4             | NW_007281365.1                     | 2974357                 | 2958939               | LOC101938825           | 101938825            | XP_023962090.1                     |                                                                                                                                                                                                |
| type II      | K78L3             | NW_007281365.1                     | 2996774                 | 2982340               | LOC101939086           | 101939086            | XP_005292009.1                     |                                                                                                                                                                                                |
| type II      | K78L2             | NW_007281365.1                     | 3019456                 | 3013010               | LOC101943933           | 101943933            | XP_023962091.1                     |                                                                                                                                                                                                |
| type II      | K78L1             | NW_007281365.1                     | 3040012                 | 3030390               | LOC101939351           | 101939351            | XP_008167744.1                     |                                                                                                                                                                                                |
| type II      | K8L               | NW_007281365.1                     | 3108702                 | 3091209               | LOC101939638           | 101939638            | XP_005292011.1                     |                                                                                                                                                                                                |
| type II      | K8                | NW_007281365.1                     | 3135778                 | 3124174               | KRT8                   | 101944191            | XP_005291937.1                     |                                                                                                                                                                                                |

Notes: <sup>1</sup> Keratins were named according to orthology to human proteins. K9-like cysteine-rich keratins (K9LC) are termed HAS and K78-like cysteine-rich keratins (K78LC) are termed HBS keratins.

HAS, hard acidic saurosid-specific; HBS, hard basic saurosid-specific; L, like; LT, long tail.

<sup>2</sup> Gene start and end indicate the start and stop codon of the coding sequence. Introns are not indicated.

<sup>3</sup> Accession numbers (acc. nr.) of protein amino acid sequences predicted in GenBank.

<sup>4</sup> Genome assembly used for predictions: *Chrysemys picta bellii*-3.0.3 (GCF\_000241765.3).

acc., accession; n.a., not available in the genome sequence assembly; nucl., nucleotide; nr., number.

Supplementary Table S4. Keratin genes of the lizard (*Anolis carolinensis*)

| Keratin type | Name <sup>1</sup> | Genomic DNA sequence<br>(acc. nr.) | Gene start <sup>2</sup> | Gene end <sup>2</sup> | Gene name<br>(GenBank) | Gene<br>(GenBank ID) | Protein <sup>3</sup><br>(acc. nr.) | Differences between new gene prediction and GenBank<br>(GCF_000090745.1) <sup>4</sup>                                                                                                                   |
|--------------|-------------------|------------------------------------|-------------------------|-----------------------|------------------------|----------------------|------------------------------------|---------------------------------------------------------------------------------------------------------------------------------------------------------------------------------------------------------|
|              |                   |                                    | (nucl. nr.)             | (nucl. nr.)           |                        |                      |                                    |                                                                                                                                                                                                         |
| type I       | K222              | NC_014781.1                        | 70386110                | 70363387              | KRT222                 | 100563084            | XP_003222508.1                     | Coding sequence is not disrupted in GenBank. Mutation was not confirmed by our amplification and sequencing.                                                                                            |
| type I       | K24               | NC_014781.1                        | 70404011                | 70392422              | LOC100552076           | 100552076            | XP_008111591.1                     |                                                                                                                                                                                                         |
| type I       | K24L              | NC_014781.1                        | 70423458                | 70411566              | LOC103279244           | 103279244            | XP_008111590.1                     |                                                                                                                                                                                                         |
| type I       | K12L              | NC_014781.1                        | 70454294                | 70429996              | LOC100552270           | 100552270            | XP_016850071.1                     |                                                                                                                                                                                                         |
| type I       | K12               | NC_014781.1                        | 70467003                | 70460684              | LOC100552468           | 100552468            | XP_003222621.1                     |                                                                                                                                                                                                         |
| type I       | K20               | NC_014781.1                        | 70488252                | 70472744              | LOC107982248           | 107982248            | XP_016850072.1                     | Corrected exon 1: nucl: 70488252..70488500, frameshift at nucl. 70488278; not predicted to encode a keratin.                                                                                            |
| type I       | K23               | NC_014781.1                        | 70552329                | 70519742              | krt23                  | 100552665            | XP_008111584.1                     |                                                                                                                                                                                                         |
| type I       | K36L1             | NC_014781.1                        | 70598936                | 70591466              | LOC100337549           | 100337549            | NP_001280052.1                     |                                                                                                                                                                                                         |
| type I       | K36L2             | NC_014781.1                        | 70614366                | 70606275              | krt36                  | 100337543            | NP_001280048.1                     |                                                                                                                                                                                                         |
| type I       | K15               | NC_014781.1                        | 70630952                | 70621017              | LOC100552862           | 100552862            | XP_008111595.1                     |                                                                                                                                                                                                         |
| type I       | K19               | NC_014781.1                        | 70661136                | 70648031              | LOC100563808           | 100563808            | XP_008111599.1                     |                                                                                                                                                                                                         |
| type I       | K9L1              | NC_014781.1                        | 70711123                | 70702384              | LOC100553064           | 100553064            | XP_008111598.2                     |                                                                                                                                                                                                         |
| type I       | K9L2              | NC_014781.1                        | 70743419                | 70729212              | LOC100553253           | 100553253            | XP_016850073.1                     |                                                                                                                                                                                                         |
| type I       | HAS1 (K9LC1)      | NC_014781.1                        | 70773480                | 70763471              | LOC100553450           | 100553450            | XP_016850077.1                     | Exon in LOC107983006, predicted exon 2: nucl. 7077943..70770861 and exon 3: nucl. 70768746..70768590, corrected exon 4: starts at nucl. 70768463<br>exon 1 of HAS1; corrected range: 70773480..70772921 |
| type I       | n.a.              | NC_014781.1                        | 70773480                | 70772921              | LOC107983006           | 107983006            | XP_016850076.1                     |                                                                                                                                                                                                         |
| type I       | HAS2 (K9LC2)      | NC_014781.1                        | 70784815                | 70777029              | LOC100337544           | 100337544            | NP_001280049.1                     |                                                                                                                                                                                                         |
| type I       | HAS3 (K9LC3)      | NC_014781.1                        | 70807056                | 70799064              | LOC100553650           | 100553650            | XP_003222627.3                     |                                                                                                                                                                                                         |
| type I       | HAS4 (K9LC4)      | NC_014781.1                        | 70828115                | 70819171              | LOC100553851           | 100553851            | XP_016850078.1                     |                                                                                                                                                                                                         |
| type I       | K14L1             | NC_014781.1                        | 70856045                | 70844971              | LOC100564200           | 100564200            | XP_003222513.1                     |                                                                                                                                                                                                         |
| type I       | K14L2             | NC_014781.1                        | 70875350                | 70865556              | LOC100564396           | 100564396            | XP_003222514.1                     |                                                                                                                                                                                                         |
| type I       | K117              | NC_014781.1                        | 70935269                | 70919125              | LOC100554046           | 100554046            | XP_008111601.1                     |                                                                                                                                                                                                         |
| type I       | K18               | NW_003338797.1                     | 1886076                 | 1901530               | KRT18                  | 100567731            | XP_003224490.1                     |                                                                                                                                                                                                         |
| type II      | K80               | NC_014777.1                        | 95942323                | 95982372              | LOC100562605           | 100562605            | XP_008102289.1                     |                                                                                                                                                                                                         |
| type II      | K7                | NC_014777.1                        | 95891088                | 95868214              | LOC100567055           | 100567055            | XP_003217023.1                     |                                                                                                                                                                                                         |
| type II      | K84L1             | NC_014777.1                        | 95865739                | 95849903              | LOC100562411           | 100562411            | XP_016846291.1                     |                                                                                                                                                                                                         |
| type II      | K84L2             | NC_014777.1                        | 95839095                | 95825623              | LOC100337546           | 100337546            | NP_001280051.1                     |                                                                                                                                                                                                         |
| type II      | K84L3             | NC_014777.1                        | 95817465                | 95802462              | LOC100562208           | 100562208            | XP_003217080.2                     |                                                                                                                                                                                                         |
| type II      | K84L4             | NC_014777.1                        | 95799482                | 95789077              | LOC100337545           | 100337545            | NP_001280050.1                     |                                                                                                                                                                                                         |
| type II      | K5L4              | NC_014777.1                        | 95777143                | 95758353              | LOC100562008           | 100562008            | XP_008102284.2                     |                                                                                                                                                                                                         |
| type II      | K5L3              | NC_014777.1                        | 95731292                | 95720930              | LOC100566287           | 100566287            | XP_003217019.1                     |                                                                                                                                                                                                         |
| type II      | K5L2              | NC_014777.1                        | 95702695                | 95689880              | LOC100566088           | 100566088            | XP_003217018.1                     |                                                                                                                                                                                                         |
| type II      | K5L1              | NC_014777.1                        | 95685012                | 95666735              | LOC100561812           | 100561812            | XP_003217078.1                     |                                                                                                                                                                                                         |
| type II      | HBS1 (K78LC1)     | NC_014777.1                        | 95656070                | 95645086              | LOC100561620           | 100561620            | XP_003217077.2                     |                                                                                                                                                                                                         |
| type II      | HBS2 (K78LC2)     | NC_014777.1                        | 95623784                | 95610121              | LOC100561422           | 100561422            | XP_003217076.3                     |                                                                                                                                                                                                         |
| type II      | HBS3 (K78LC3)     | NC_014777.1                        | 95587325                | 95566790              | LOC100561224           | 100561224            | XP_003217075.2                     |                                                                                                                                                                                                         |
| type II      | K78LT             | NC_014777.1                        | 95532173                | 95523420              | LOC100560827           | 100560827            | XP_016846726.1                     |                                                                                                                                                                                                         |
| type II      | K78L5             | NC_014777.1                        | 95512139                | 95490960              | LOC100560629           | 100560629            | XP_016846727.1                     |                                                                                                                                                                                                         |
| type II      | K78L4             | NC_014777.1                        | 95457122                | 95440262              | LOC100560433           | 100560433            | XP_003217072.1                     |                                                                                                                                                                                                         |
| type II      | K78L3             | NC_014777.1                        | 95436358                | 95421422              | LOC100560234           | 100560234            | XP_008102271.2                     |                                                                                                                                                                                                         |
| type II      | K78L2             | NC_014777.1                        | 95413159                | 95401878              | LOC100560037           | 100560037            | XP_003217070.1                     |                                                                                                                                                                                                         |
| type II      | K78L1             | NC_014777.1                        | 95385652                | 95370266              | LOC100565886           | 100565886            | XP_003217017.1                     |                                                                                                                                                                                                         |
| type II      | K8                | NW_003338797.1                     | 1781585                 | 1779090               | KRT8                   | 100566434            | XP_003224483.1                     |                                                                                                                                                                                                         |

Notes: <sup>1</sup> Keratins were named according to orthology to human proteins. K9-like cysteine-rich keratins (K9LC) are termed HAS and K78-like cysteine-rich keratins (K78LC) are termed HBS keratins. HAS, hard acidic saurosid-specific; HBS, hard basic saurosid-specific; L, like; LT, long tail.

<sup>2</sup> Gene start and end indicate the start and stop codon of the coding sequence. Introns are not indicated.

<sup>3</sup> Accession numbers (acc. nr.) of protein amino acid sequences predicted in GenBank.

<sup>4</sup> Genome assembly used for predictions: AnoCar2.0 (GCF\_000090745.1).

acc., accession; n.a., not available in the genome sequence assembly; nucl., nucleotide; nr., number.

Supplementary Table S5. Keratin genes of the snake (*Probothrops mucrosquamatus*)

| Keratin type | Name <sup>1</sup> | Genomic DNA sequence<br>(acc. nr.) | Gene start <sup>2</sup><br>(nucl. nr.) | Gene end <sup>2</sup><br>(nucl. nr.) | Gene name<br>(GenBank) | Gene<br>(GenBank ID) | Protein <sup>3</sup><br>(acc. nr.) | Differences between new gene prediction and GenBank<br>(GCF_001527695.1) <sup>4</sup> |
|--------------|-------------------|------------------------------------|----------------------------------------|--------------------------------------|------------------------|----------------------|------------------------------------|---------------------------------------------------------------------------------------|
| type I       | K222              | NW_015386388.1                     | 4579705                                | 4563973                              | KRT222                 | 107303117            | XP_015687800.1                     |                                                                                       |
| type I       | K24               | NW_015386388.1                     | 4593683                                | 4585551                              | KRT24                  | 107303090            | XP_015687766.1                     |                                                                                       |
| type I       | K24L              | NW_015386388.1                     | 4610502                                | 4601245                              | LOC107303091           | 107303091            | XP_015687767.1                     | Named K10-like in GenBank                                                             |
| type I       | K10L1             | NW_015386388.1                     | 4628673                                | 4615542                              | LOC107303119           | 107303119            | XP_015687801.1                     |                                                                                       |
| type I       | K10L2             | NW_015386388.1                     | 4639339                                | 4631362                              | LOC107303022           | 107303022            | XP_015687687.1                     | Incomplete N-terminus                                                                 |
| type I       | K20L              | NW_015386388.1                     | 4668627                                | 4658157                              | LOC107303120           | 107303120            | XP_015687802.1                     | Incomplete N-terminus                                                                 |
| type I       | K23               | NW_015386388.1                     | 4728213                                | 4703693                              | LOC107303092           | 107303092            | XP_015687768.1                     |                                                                                       |
| type I       | K15               | NW_015386388.1                     | 4782878                                | 4774150                              | LOC107303093           | 107303093            | XP_015687770.1                     |                                                                                       |
| type I       | K19               | NW_015386388.1                     | 4810269                                | 4799955                              | LOC107303094           | 107303094            | XP_015687772.1                     |                                                                                       |
| type I       | K9L               | NW_015386388.1                     | 4852795                                | 4844127                              | LOC107303023           | 107303023            | XP_015687689.1                     |                                                                                       |
| type I       | HAS1 (K9LC1)      | NW_015386388.1                     | 4946558                                | 4939829                              | LOC107303121           | 107303121            | XP_015687803.1                     |                                                                                       |
| type I       | HAS2 (K9LC2)      | NW_015386388.1                     | 4974935                                | 4966799                              | LOC107303122           | 107303122            | XP_015687805.1                     |                                                                                       |
| type I       | K14L1             | NW_015386388.1                     | 5009323                                | 5000237                              | LOC107303095           | 107303095            | XP_015687773.1                     |                                                                                       |
| type I       | K14L2             | NW_015386388.1                     | 5025051                                | 5018341                              | LOC107303123           | 107303123            | XP_015687806.1                     | Incomplete N- and C-termini                                                           |
| type I       | K117              | NW_015386388.1                     | 5088974                                | 5072974                              | LOC107303024           | 107303024            | XP_015687690.2                     |                                                                                       |
| type I       | K18               | NW_015386810.1                     | 591188                                 | 599294                               | KRT18                  | 107288181            | XP_015672253.1                     |                                                                                       |
| type II      | K80               | NW_015387607.1                     | 203655                                 | 243569                               | n.a.                   | n.a.                 | n.a.                               | Identified by BLAST between <i>Krt7</i> and <i>Faim2</i>                              |
| type II      | K7                | NW_015387607.1                     | 281992                                 | 301511                               | LOC107292791           | 107292791            | XP_015677400.1                     |                                                                                       |
| type II      | K5L2              | NW_015387607.1                     | 380309                                 | 370750                               | LOC107292792           | 107292792            | XP_015677401.1                     |                                                                                       |
| type II      | K5L1              | NW_015387607.1                     | 415254                                 | 402945                               | LOC107292794           | 107292794            | XP_015677404.1                     |                                                                                       |
| type II      | HBS1 (K78LC1)     | NW_015387607.1                     | 438703                                 | 430012                               | LOC107292789           | 107292789            | XP_015677398.1                     |                                                                                       |
| type II      | HBS2 (K78LC2)     | NW_015386143.1                     | 23602                                  | 12950                                | LOC107284963           | 107284963            | XP_015668587.1                     | Sequence ends after exon 6                                                            |
| type II      | HBS3 (K78LC3)     | NW_015386143.1                     | 56136                                  | 42413                                | LOC107285009           | 107285009            | XP_015668640.1                     |                                                                                       |
| type II      | HBS4 (K78LC4)     | NW_015386143.1                     | 93963                                  | 74922                                | LOC107284973           | 107284973            | XP_015668597.1                     |                                                                                       |
| type II      | K78LT             | NW_015386143.1                     | 131703                                 | 122663                               | LOC107284982           | 107284982            | XP_015668608.1                     |                                                                                       |
| type II      | K78L4             | NW_015386143.1                     | 161149                                 | 148418                               | LOC107284991           | 107284991            | XP_015668619.1                     |                                                                                       |
| type II      | K78L3             | NW_015386143.1                     | 205835                                 | 180432                               | LOC107285020           | 107285020            | XP_015668651.1                     |                                                                                       |
| type II      | K78L2             | NW_015390075.1                     | 40293                                  | 45677                                | LOC107298626           | 107298626            | XP_015683489.1                     | Sequence ends after exon 5                                                            |
| type II      | K78L1             | NW_015390075.1                     | 17942                                  | 29969                                | LOC107298627           | 107298627            | XP_015683491.1                     | Incomplete                                                                            |
| type II      | K8                | NW_015386810.1                     | 534700                                 | 518951                               | KRT8                   | 107288180            | XP_015672252.1                     |                                                                                       |

Notes: <sup>1</sup> Keratins were named according to orthology to human proteins. K9-like cysteine-rich keratins (K9LC) are termed HAS and K78-like cysteine-rich keratins (K78LC) are termed HBS keratins. HAS, hard acidic saurosid-specific; HBS, hard basic saurosid-specific; L, like; LT, long tail.

<sup>2</sup> Gene start and end indicate the start and stop codon of the coding sequence. Introns are not indicated.

<sup>3</sup> Accession numbers (acc. nr.) of protein amino acid sequences predicted in GenBank.

<sup>4</sup> Genome assembly used for predictions: P.Mucros\_1.0 (GCF\_001527695.1).

acc., accession; n.a., not available in the genome sequence assembly; nucl., nucleotide; nr., number.

Supplementary Table S6. Keratin genes of the frog (*Xenopus tropicalis*)

| Keratin type | Name <sup>1</sup> | Genomic DNA sequence | Gene start <sup>2</sup> | Gene end <sup>2</sup> | Gene name (GenBank) | Gene (GenBank ID) | Protein <sup>3</sup> (acc. nr.) | Differences between new gene prediction and GenBank (GCF_000004195.3) <sup>4</sup> |
|--------------|-------------------|----------------------|-------------------------|-----------------------|---------------------|-------------------|---------------------------------|------------------------------------------------------------------------------------|
|              |                   | (acc. nr.)           | (nucl. nr.)             | (nucl. nr.)           |                     |                   |                                 |                                                                                    |
| type I       | K222              | NW_016683386.1       | 1124475                 | 1105206               | krt222              | 100488319         | XP_004918751.1                  |                                                                                    |
| type I       | Frog1-02          | NW_016683386.1       | 1154939                 | 1150145               | LOC100487269        | 100487269         | XP_002940698.2                  | Corrected head domain                                                              |
| type I       | Frog1-03          | NW_016683386.1       | 1171666                 | 1168635               | krt10               | 100487422         | XP_012808327.1                  |                                                                                    |
| type I       | Frog1-04          | NW_016683386.1       | 1201989                 | <1197543              | LOC100158585        | 100158585         | NP_001121485.1                  |                                                                                    |
| type I       | Frog1-05          | NW_016683386.1       | 1240852                 | 1233754               | LOC100488172        | 100488172         | XP_002940703.2                  | Incomplete at both ends                                                            |
| type I       | Frog1-06          | NW_016683386.1       | 1254262                 | 1245094               | krt24               | 496660            | NP_001011224.1                  |                                                                                    |
| type I       | Frog1-07          | NW_016683386.1       | 1272369                 | 1264944               | LOC101731128        | 101731128         | XP_004918844.3                  | Incomplete                                                                         |
| type I       | Frog1-08          | NW_016683386.1       | 1331129                 | 1323043               | xak-c               | 100486967         | XP_002940696.1                  |                                                                                    |
| type I       | Frog1-09          | NW_016683386.1       | 1347940                 | 1343996               | krt12               | 100144436         | NP_001116496.1                  |                                                                                    |
| type I       | Frog1-10          | NW_016683386.1       | 1369802                 | 1364487               | xk81a1              | 100145042         | NP_001120056.1                  |                                                                                    |
| type I       | Frog1-11          | NW_016683386.1       | 1390695                 | 1385231               | LOC549413           | 549413            | NP_001016659.1                  |                                                                                    |
| type I       | Frog1-12          | NW_016683386.1       | 1423486                 | 1440842               | LOC101730713        | 101730713         | XP_004918757.1                  | Incomplete                                                                         |
| type I       | Frog1-13          | NW_016683386.1       | 1455161                 | 1449470               | krt16               | 100499212         | XP_004918756.1                  |                                                                                    |
| type I       | Frog1-14          | NW_016683386.1       | >1473684                | 1462819               | krt14               | 100127859         | XP_012808153.1                  |                                                                                    |
| type I       | Frog1-15          | NC_030686.1          | 1610298                 | 1573905               | LOC100491563        | 100491563         | XP_002939081.2                  | One exon is missing                                                                |
| type I       | Frog1-16          | NC_030686.1          | 1678655                 | 1672884               | krt35               | 100491736         | XP_002939082.3                  |                                                                                    |
| type I       | Frog1-17          | NC_030686.1          | 1696854                 | 1688820               | krt15               | 100379888         | XP_002939083.2                  |                                                                                    |
| type I       | Frog1-18          | NC_030686.1          | 1711958                 | 1703070               | LOC100490379        | 100490379         | XP_004918754.1                  |                                                                                    |
| type I       | Frog1-19          | NC_030686.1          | 1738209                 | 1727533               | krt19               | 394514            | XP_012827034.1                  |                                                                                    |
| type I       | Frog1-20          | NC_030686.1          | 1788322                 | 1780124               | LOC100490554        | 100490554         | XP_012808156.1                  | Incomplete                                                                         |
| type I       | Frog1-21          | NC_030686.1          | 1797326                 | 1791399               | LOC100490729        | 100490729         | XP_002939076.3                  |                                                                                    |
| type I       | Frog1-22          | NC_030686.1          | 1812174                 | 1807464               | krt17               | 100490897         | XP_002939077.1                  |                                                                                    |
| type I       | K117              | NC_030686.1          | >1861983                | 1857265               | krt70               | 448098            | NP_001006687.1                  | Start of gene in sequence gap, first exon missing                                  |
| type I       | K18               | NC_030678.1          | 144892767               | 144889352             | krt18               | 394541            | NP_988944.1                     |                                                                                    |
| type II      | K80               | NC_030678.1          | 145340325               | 145358155             | krt80               | 100316911         | NP_001163982.1                  |                                                                                    |
| type II      | Frog2-02          | NC_030678.1          | 145282277               | 145276908             | krt5.7              | 100101751         | XP_002935788.2                  |                                                                                    |
| type II      | Frog2-03          | NC_030678.1          | 145241155               | 145245991             | krt5.3              | 100491329         | XP_012813652.1                  |                                                                                    |
| type II      | Frog2-04          | NC_030678.1          | 145192735               | 145197334             | krt5.2              | 779830            | NP_001072377.1                  |                                                                                    |
| type II      | Frog2-05          | NC_030678.1          | 145173996               | 145182744             | krt5.5              | 100489468         | XP_002935776.1                  |                                                                                    |
| type II      | Frog2-06          | NC_030678.1          | 145153628               | 145161984             | krt75               | 100491159         | XP_002935786.2                  |                                                                                    |
| type II      | Frog2-07          | NC_030678.1          | 145145209               | 145150875             | krt5.6              | 100489309         | XP_002935775.1                  |                                                                                    |
| type II      | Frog2-08          | NC_030678.1          | 145131141               | 145137134             | LOC100490994        | 100490994         | XP_002935785.1                  |                                                                                    |
| type II      | Frog2-09          | NC_030678.1          | 145117276               | 145123151             | LOC100490820        | 100490820         | XP_002935784.2                  |                                                                                    |
| type II      | Frog2-10          | NC_030678.1          | 145095169               | 145106302             | krt6a               | 100490652         | XP_017947337.1                  |                                                                                    |
| type II      | Frog2-11          | NC_030678.1          | 145072999               | 145077895             | LOC100489158        | 100489158         | XP_002935774.1                  |                                                                                    |
| type II      | Frog2-12          | NC_030678.1          | 145055578               | 145062037             | krt5.4              | 448361            | NP_001006716.1                  |                                                                                    |
| type II      | Frog2-13          | NC_030678.1          | 145023433               | 145028461             | krt6                | 100144701         | NP_001166034.1                  |                                                                                    |
| type II      | K8                | NC_030678.1          | 144954443               | 144962883             | krt8                | 431676            | NP_001002797.1                  |                                                                                    |

Notes: <sup>1</sup> Keratins were named according to orthology to human proteins or according to type and position of the gene (Figure 1) ("Frog-type-position").

<sup>2</sup> Gene start and end indicate the start and stop codon of the coding sequence. Introns are not indicated.

<sup>3</sup> Accession numbers (acc. nr.) of protein amino acid sequences predicted in GenBank.

<sup>4</sup> Genome assembly used for predictions: *Xenopus tropicalis*\_v9.1 (GCF\_000004195.3).

acc., accession; n.a., not available in the genome sequence assembly; nucl., nucleotide; nr., number.

**Supplementary Table S7. Keratin genes of the platypus (*Ornithorhynchus anatinus*)**

| Keratin type | Name <sup>1</sup> | Genomic DNA sequence<br>(GenBank acc. nr.) | Gene ID<br>(GenBank) | Protein<br>(GenBank acc. nr.) | Number of cysteine residues | Notes               |
|--------------|-------------------|--------------------------------------------|----------------------|-------------------------------|-----------------------------|---------------------|
| type I       | K222              | NC_041738.1                                | 100074593            | XP_028930428.1                | 2                           |                     |
| type I       | K224              | NC_041738.1                                | 100091675            | XP_028930435.1                | 1                           |                     |
| type I       | K24L4             | NC_041738.1                                | 100091681            | XP_001512134.1                | 6                           |                     |
| type I       | K24L3             | NC_041738.1                                | 100091690            | XP_028931081.1                | 6                           |                     |
| type I       | K24L2             | NC_041738.1                                | 100091696            | XP_028931091.1                | 6                           |                     |
| type I       | K24L1             | NC_041738.1                                | 100091718            | XP_028931269.1                | 2                           | sequence incomplete |
| type I       | K25               | NC_041738.1                                | 100091723            | XP_001520523.2                | 12                          |                     |
| type I       | K26               | NC_041738.1                                | 100091728            | XP_001512895.1                | 15                          |                     |
| type I       | K27               | NC_041738.1                                | 100091669            | XP_001513002.1                | 11                          |                     |
| type I       | K28               | NC_041738.1                                | 100091735            | XP_001520530.1                | 12                          |                     |
| type I       | K10L2             | NC_041738.1                                | 100091742            | XP_028931907.1                | 6                           |                     |
| type I       | K10L1             | NC_041738.1                                | 100091750            | XP_007662432.2                | 2                           | sequence incomplete |
| type I       | K20L2             | NC_041738.1                                | 100091766            | XP_028931908.1                | 1                           |                     |
| type I       | K12               | NC_041738.1                                | 100081910            | XP_028931359.1                | 2                           |                     |
| type I       | K20L1             | NC_041738.1                                | 114815072            | XP_028931098.1                | 4                           |                     |
| type I       | K23               | NC_041738.1                                | 100091772            | XP_007662433.2                | 5                           |                     |
| type I       | K39               | NC_041738.1                                | 100091780            | XP_028931100.1                | 27                          |                     |
| type I       | K40               | NC_041738.1                                | 100091796            | XP_007662434.2                | 35                          |                     |
| type I       | K33a              | NC_041738.1                                | 114815087            | XP_028931270.1                | 28                          |                     |
| type I       | K33b              | NC_041738.1                                | 100074485            | XP_007655203.1                | 23                          |                     |
| type I       | K34               | NC_041738.1                                | 100074443            | XP_001505493.2                | 30                          |                     |
| type I       | K31               | NC_041738.1                                | 100088880            | XP_001518440.1                | 32                          |                     |
| type I       | K37               | NC_041738.1                                | 100088890            | XP_001518445.2                | 26                          |                     |
| type I       | K38               | NC_041738.1                                | 100083777            | XP_028931108.1                | 19                          |                     |
| type I       | K32               | NC_041738.1                                | 100083755            | XP_007661319.2                | 25                          |                     |
| type I       | K36               | NC_041738.1                                | 100083734            | XP_001514298.2                | 10                          | sequence incomplete |
| type I       | K13               | NC_041738.1                                | 100079550            | XP_001510496.2                | 7                           |                     |
| type I       | K15               | NC_041738.1                                | 100086149            | n.a.                          | n.a.                        | pseudogene          |
| type I       | K19               | NC_041738.1                                | 107547508            | XP_028931283.1                | 0                           |                     |
| type I       | K9                | NC_041738.1                                | 100082561            | XP_028931280.1                | 5                           |                     |
| type I       | K14               | NC_041738.1                                | 100077389            | XP_001511728.2                | 6                           |                     |
| type I       | K16               | NC_041738.1                                | 114815097            | XP_028931325.1                | 9                           |                     |
| type I       | K17               | NC_041738.1                                | 100092093            | XP_028932116.1                | 4                           |                     |
| type I       | K18               | NC_041737.1                                | 114814771            | XP_028930001.1                | 2                           |                     |
| type II      | K80               | NC_041737.1                                | 100086395            | XP_028929028.1                | 12                          |                     |
| type II      | K7                | NC_041737.1                                | 100087958            | XP_028929030.1                | 0                           |                     |
| type II      | K81L2             | NC_041737.1                                | 103164921            | XP_007654211.2                | n.a.                        | sequence incomplete |
| type II      | K81L              | NC_041737.1                                | 100092864            | XP_028929027.1                | 33                          |                     |
| type II      | K83L2             | NC_041737.1                                | 100092929            | XP_028929031.1                | 34                          |                     |
| type II      | K83L1             | NC_041737.1                                | 100092926            | XP_028929024.1                | 31                          |                     |
| type II      | K85L2             | NC_041737.1                                | 103164923            | XP_028928757.1                | 18                          |                     |
| type II      | K85L1             | NC_041737.1                                | 100089219            | XP_028929033.1                | 25                          |                     |
| type II      | K84               | NC_041737.1                                | 100090360            | XP_028929015.1                | 19                          |                     |
| type II      | K82               | NC_041737.1                                | 103164922            | XP_028929034.1                | 21                          | sequence incomplete |
| type II      | K75               | NC_041737.1                                | 114814612            | XP_028929009.1                | 4                           |                     |
| type II      | K6aL              | NC_041737.1                                | 100092858            | XP_001514525.1                | 10                          |                     |
| type II      | K5L               | NC_041737.1                                | 103168998            | XP_028929007.1                | 4                           |                     |
| type II      | K6AL              | NC_041737.1                                | 114814567            | n.a.                          | n.a.                        | pseudogene          |
| type II      | K71               | NC_041737.1                                | 100092898            | XP_028929017.1                | 9                           |                     |
| type II      | K72               | NC_041737.1                                | 100092892            | XP_007654210.1                | 10                          |                     |
| type II      | K73               | NC_041737.1                                | 100092888            | XP_028928758.1                | 12                          |                     |
| type II      | K74               | NC_041737.1                                | 100092881            | XP_001521385.3                | 10                          |                     |
| type II      | K2L2              | NC_041737.1                                | 100092878            | XP_028929018.1                | 4                           |                     |
| type II      | K2L1              | NC_041737.1                                | 114814568            | XP_028928759.1                | 6                           |                     |
| type II      | K1                | NC_041737.1                                | 114814611            | XP_028929002.1                | 3                           |                     |
| type II      | K77               | NC_041737.1                                | 103164924            | XP_028929014.1                | 7                           |                     |
| type II      | K76               | NC_041737.1                                | 100073951            | XP_028929006.1                | 2                           |                     |
| type II      | K3L2              | NC_041737.1                                | 114814569            | XP_028928760.1                | 4                           |                     |
| type II      | K3L1              | NC_041737.1                                | 100074276            | XP_001505912.1                | 7                           |                     |
| type II      | K4                | NC_041737.1                                | 100078666            | XP_028929023.1                | 9                           |                     |
| type II      | K79               | NC_041737.1                                | 100088469            | XP_028929019.1                | 10                          |                     |
| type II      | K78               | NC_041737.1                                | 100084867            | XP_028928761.1                | 8                           |                     |
| type II      | K8                | NC_041737.1                                | 100078521            | XP_001507306.1                | 0                           |                     |

Notes: <sup>1</sup> Keratins were named according to orthology to human proteins. K, keratin; L, like. Genome sequence assembly used for predictions: mOrnAna1.p.v1 (GCF\_004115215.1). n.a., not applicable



**Supplementary Table S8. Number of cysteine residues in keratins of the kiwi (*Apteryx australis mantelli*)**

| <b>Keratin type</b> | <b>Name</b>   | <b>Protein<br/>(GenBank acc. nr.)</b> | <b>Number of cysteine residues</b> |
|---------------------|---------------|---------------------------------------|------------------------------------|
| type I              | K222          | XP_025928687.1                        | 3                                  |
| type I              | K12           | XP_013801838.1                        | 1                                  |
| type I              | K20           | XP_013801841.1                        | 0                                  |
| type I              | K23           | XP_013801848.1                        | 5                                  |
| type I              | K36L          | XP_013801846.1                        | 18                                 |
| type I              | K15           | XP_013801843.1                        | 6                                  |
| type I              | K19           | XP_013801844.1                        | 1                                  |
| type I              | K9L1          | XP_013801847.1                        | 5                                  |
| type I              | K9L2          | XP_013801845.1                        | 5                                  |
| type I              | K9L3          | XP_013801842.1                        | 9                                  |
| type I              | K9L4          | XP_013801836.1                        | 12                                 |
| type I              | HAS1 (K9LC1)  | XP_013801837.1                        | 28                                 |
| type I              | HAS2 (K9LC2)  | XP_013801835.1                        | 18                                 |
| type I              | HAS3 (K9LC3)  | XP_013801834.1                        | 21                                 |
| type I              | K14L1         | XP_013801867.1                        | 2                                  |
| type I              | K14L2         | XP_013801833.1                        | 10                                 |
| type I              | K18           | XP_013805088.1                        | 0                                  |
| type II             | K80           | XP_013810925.1                        | 9                                  |
| type II             | K7            | XP_013810923.1                        | 0                                  |
| type II             | K84L          | XP_013810920.1                        | 18                                 |
| type II             | K5L4          | XP_013810918.1                        | 6                                  |
| type II             | K5L3          | XP_013810922.1                        | 10                                 |
| type II             | K5L2          | XP_013810921.1                        | 3                                  |
| type II             | K5L1          | XP_013810917.1                        | 3                                  |
| type II             | HBS1 (K78LC1) | XP_013810916.1                        | 35                                 |
| type II             | HBS2 (K78LC2) | XP_013810915.1                        | 27                                 |
| type II             | HBS3 (K78LC3) | XP_013810914.1                        | 16                                 |
| type II             | K78LT         | XP_013810912.1                        | 9                                  |
| type II             | K78L5         | XP_013810911.1                        | 11                                 |
| type II             | K78L4         | XP_013810926.1                        | 8                                  |
| type II             | K78L3         | XP_013810927.1                        | 8                                  |
| type II             | K78L2         | XP_013810928.1                        | 8                                  |
| type II             | K78L1         | XP_013810929.1                        | 7                                  |
| type II             | K8            | XP_013813947.1                        | 2                                  |

Notes: Keratins were named according to orthology to chicken proteins.

K, keratin; L, like; HA/BS, hard acidic/basic sauropsid-specific.

Genome sequence assembly: AptMant0 (GCF\_001039765.1).

**Supplementary Table S9. Number of cysteine residues in keratins of the ostrich (*Struthio camelus australis*)**

| Keratin type | Name          | Genomic DNA/cDNA sequence (acc. nr.) | Gene ID (GenBank) | Protein (GenBank acc. nr.) | Number of cysteine residues | Notes                                  |
|--------------|---------------|--------------------------------------|-------------------|----------------------------|-----------------------------|----------------------------------------|
| type I       | K222          | NW_009272154.1                       | 104152437         | XP_009686054.1             | 3                           |                                        |
| type I       | K12           | NW_009272154.1                       | 104152438         | XP_009686056.1             | 1                           |                                        |
| type I       | K20           | NW_009272154.1                       | 104152454         | XP_009686074.1             | 1                           |                                        |
| type I       | K23           | NW_009272154.1                       | 104152435         | XP_009686053.1             | 3                           |                                        |
| type I       | K15           | NW_009272154.1                       | 104152453         | XP_009686073.1             | 6                           |                                        |
| type I       | K19           | NW_009272154.1                       | 104152434         | XP_009686052.1             | 1                           | sequence incomplete                    |
| type I       | K9L1          | NW_009272154.1                       | 104152433         | XP_009686051.1             | 7                           |                                        |
| type I       | K9L2          | NW_009272154.1                       | 104152452         | XP_009686072.1             | 7                           |                                        |
| type I       | K9L3          | NW_009272154.1                       | 104152432         | XP_009686050.1             | 8                           |                                        |
| type I       | K9L4          | NW_009272154.1                       | 104152431         | XP_009686049.1             | 11                          |                                        |
| type I       | HAS1 (K9LC1)  | NW_009272154.1                       | 104152430         | XP_009686048.1             | 28                          |                                        |
| type I       | HAS2 (K9LC2)  | NW_009272154.1                       | 104152429         | XP_009686047.1             | 26                          |                                        |
| type I       | HAS3 (K9LC3)  | NW_009272154.1                       | 104152451         | XP_009686071.1             | 17                          | sequence incomplete                    |
| type I       | K14L1         | NW_009272154.1                       | 104152428         | XP_009686045.1             | 2                           |                                        |
| type I       | K14L2         | NW_009272154.1                       | 104152450         | XP_009686070.1             | 2                           |                                        |
| type I       | K18           | NW_009270297.1                       | 104152322         | XP_009685921.1             | 0                           |                                        |
| type II      | K80           | NW_009270297.1                       | 104152362         | XP_009685973.1             | 10                          |                                        |
| type II      | K7            | NW_009270297.1                       | 104152373         | XP_009686015.1             | 0                           |                                        |
| type II      | K5L4          | NW_009270297.1                       | 104152571         | XP_009686271.1             | 8                           |                                        |
| type II      | K5L3          | NW_009270297.1                       | 104152351         | XP_009685961.1             | 3                           |                                        |
| type II      | K5L2          | NW_009270297.1                       | 104152346         | XP_009685948.1             | 3                           |                                        |
| type II      | K5L1          | NW_009270297.1                       | 104152560         | XP_009686260.1             | 1                           |                                        |
| type II      | HBS1 (K78LC1) | NW_009270297.1                       | 104152550         | XP_009686249.1             | 27                          | Gene ID: 2 incomplete coding sequences |
| type II      | HBS2 (K78LC2) | NW_009270297.1                       | 104152550         | XP_009686249.1             | 19                          | Gene ID: 2 incomplete coding sequences |
| type II      | K78LT         | NW_009270297.1                       | 104152547         | XP_009686235.1             | 7                           | sequence incomplete                    |
| type II      | K78L          | NW_009270297.1                       | 104152337         | XP_009685942.1             | 12                          |                                        |
| type II      | K8            | n.a.                                 | n.a.              | n.a.                       | n.a.                        |                                        |

Notes: Keratins were named according to orthology to chicken proteins.

K, keratin; L, like; HA/BS, hard acidic/basic sauropsid-specific.

Genome sequence assembly: ASM69896v1 (GCF\_000698965.1).

n.a., not available.

**Supplementary Table S10. Keratin genes of the zebra finch (*Taeniopygia guttata*)**

| Keratin type | Name <sup>1</sup> | Genomic DNA sequence<br>(acc. nr.) | Gene ID<br>(GenBank) | Protein <sup>3</sup><br>(GenBank acc. nr.) | Number of cysteine residues | Notes                         |
|--------------|-------------------|------------------------------------|----------------------|--------------------------------------------|-----------------------------|-------------------------------|
| type I       | K222              | NC_044239.1                        | 101233916            | XP_004174708.1                             |                             |                               |
| type I       | K12               | NC_044239.1                        | 100229407            | XP_012426581.1                             | 1                           |                               |
| type I       | K20               | NC_044239.1                        | 100226488            | XP_002194074.3                             | 0                           |                               |
| type I       | K23               | NC_044239.1                        | 101233949            | XP_004174709.2                             | 9                           |                               |
| type I       | K15               | NC_044239.1                        | 100223619            | XP_002194098.1                             | 5                           |                               |
| type I       | K19               | NC_044239.1                        | 100227535            | XP_002197015.2                             | 0                           |                               |
| type I       | K9L1              | NC_044239.1                        | 101233334            | XP_030112293.1                             | 11                          |                               |
| type I       | K9L2              | NC_044239.1                        | 100220698            | XP_002194122.4                             | 10                          |                               |
| type I       | K9L3              | NC_044239.1                        | 100228906            | XP_030112121.1                             | 9                           |                               |
| type I       | K9L4              | NC_044239.1                        | 100230285            | XP_030112123.1                             | 10                          |                               |
| type I       | HAS1 (K9LC1)      | NC_044239.1                        | 100227476            | XP_012426580.2                             | 28                          |                               |
| type I       | HAS2 (K9LC2)      | NC_044239.1                        | 100224590            | XP_002194209.3                             | 27                          |                               |
| type I       | HAS3 (K9LC3)      | NC_044239.1                        | 100221664            | XP_030112003.1                             | 25                          |                               |
| type I       | K14L1             | NC_044239.1                        | 100231284            | XP_030112001.1                             | 3                           | Gene ID: 2 coding sequences   |
| type I       | K14L2             | NC_044239.1                        | 100231284            | XP_012426586.2                             | 3                           | Gene ID: 2 coding sequences   |
| type I       | K18               | NC_044242.1                        | 115491360            | XP_030115101.1                             | 0                           |                               |
| type II      | K80               | NC_044242.1                        | 115491353            | XP_030115077.1                             | 5                           |                               |
| type II      | K7                | NC_044242.1                        | 100224644            | XP_030115482.1                             | 0                           |                               |
| type II      | K5L4              | NC_044242.1                        | 100224585            | XP_002195031.2                             | 10                          |                               |
| type II      | K5L3              | NC_044242.1                        | 100227468            | XP_002195007.1                             | 8                           |                               |
| type II      | K5L2              | NC_044242.1                        | 100230278            | XP_002194692.1                             | 3                           |                               |
| type II      | K5L1              | NC_044242.1                        | 100230328            | XP_030115537.1                             | 1                           | exon 1: nucl. 333626 - 332934 |
| type II      | HBS1 (K78LC1)     | NC_044242.1                        | 115491512            | XP_030115539.1                             | 35                          |                               |
| type II      | HBS2 (K78LC2)     | NC_044242.1                        | 100217876            | XP_030115112.1                             | 36                          |                               |
| type II      | K78LT             | NC_044242.1                        | 100226538            | XP_030115078.1                             | 75                          |                               |
| type II      | K78L4             | NC_044242.1                        | 100229354            | XP_030115113.1                             | 15                          |                               |
| type II      | K78L3             | NC_044242.1                        | 100232294            | XP_002191799.3                             | 14                          |                               |
| type II      | K78L2             | NC_044242.1                        | 115491354            | XP_030115084.1                             | 11                          |                               |
| type II      | K78L1             | NC_044242.1                        | 101233849            | XP_004175950.2                             | 15                          |                               |
| type II      | K8                | NC_044242.1                        | 115491358            | XP_030115098.1                             | 0                           |                               |

Notes: Keratins were named according to orthology to chicken proteins.

K, keratin; L, like; HA/BS, hard acidic/basic sauropsid-specific.

Genome assembly used for predictions: bTaeGut1\_v1.p (GCF\_003957565.1).

**Supplementary Table S11. Keratin genes of the Tibetan frog (*Nanorana parkeri*)**

| Keratin type | Name           | Genomic DNA sequence<br>(acc. nr.) | Gene ID<br>(GenBank) | Protein<br>(GenBank acc. nr.) | Number of<br>cysteine residues | Notes                       |
|--------------|----------------|------------------------------------|----------------------|-------------------------------|--------------------------------|-----------------------------|
| type I       | K222           | NW_017306323.1                     | 108804307            | XP_018431528.1                | 4                              |                             |
| type I       | Nanorana1_02   | NW_017306323.1                     | 108804320            | XP_018431537.1                | 9                              |                             |
| type I       | Nanorana1_03   | NW_017306323.1                     | 108804334            | XP_018431542.1                | 4                              |                             |
| type I       | Nanorana1_04   | NW_017306323.1                     | 108804356            | XP_018431567.1                | 6                              |                             |
| type I       | Nanorana1_05   | NW_017306323.1                     | 108804339            | XP_018431544.1                | 12                             |                             |
| type I       | Nanorana1_06   | NW_017306323.1                     | 108804340            | XP_018431545.1                | 6                              |                             |
| type I       | Nanorana1_07   | NW_017306323.1                     | 108804351            | XP_018431561.1                | 3                              |                             |
| type I       | Nanorana1_08   | NW_017306323.1                     | 108804364            | XP_018431575.1                | 2                              |                             |
| type I       | Nanorana1_09   | NW_017306510.1                     | 108787107            | XP_018412066.1                | 4                              |                             |
| type I       | Nanorana1_10   | NW_017306510.1                     | 108787113            | XP_018412076.1                | 5                              |                             |
| type I       | Nanorana1_11   | NW_017306510.1                     | 108787108            | XP_018412067.1                | 3                              |                             |
| type I       | Nanorana1_12   | NW_017306510.1                     | 108787122            | XP_018412088.1                | 0                              |                             |
| type I       | Nanorana1_13   | NW_017306510.1                     | 108787106            | XP_018412065.1                | 0                              |                             |
| type I       | Nanorana1_14   | NW_017306510.1                     | 108787114            | XP_018412078.1                | 1                              |                             |
| type I       | Nanorana1_15   | NW_017306510.1                     | 108787118            | XP_018412084.1                | 0                              |                             |
| type I       | Nanorana1_16   | NW_017306510.1                     | 108787115            | XP_018412079.1                | 2                              |                             |
| type I       | Nanorana1_17   | NW_017306510.1                     | 108787105            | XP_018412064.1                | 6                              |                             |
| type I       | Nanorana1_18   | NW_017306510.1                     | 108787121            | XP_018412087.1                | 1                              |                             |
| type I       | Nanorana1_19   | NW_017306510.1                     | 108787104            | XP_018412063.1                | 4                              | sequence incomplete         |
| type I       | Nanorana1_20   | NW_017306510.1                     | 108787103            | XP_018412061.1                | 4                              |                             |
| type I       | Nanorana1_21   | NW_017306510.1                     | 108787102            | XP_018412060.1                | 4                              |                             |
| type I       | Nanorana1_22   | NW_017306510.1                     | 108787101            | XP_018412059.1                | 4                              |                             |
| type I       | Nanorana1_23   | NW_017306510.1                     | 108787100            | XP_018412058.1                | 6                              |                             |
| type I       | Nanorana1_24   | NW_017306510.1                     | 108787099            | XP_018412057.1                | 7                              |                             |
| type I       | Nanorana1_25   | NW_017306510.1                     | 108787123            | XP_018412089.1                | 3                              |                             |
| type I       | Nanorana1_26   | NW_017306510.1                     | 108787098            | XP_018412056.1                | 3                              |                             |
| type I       | Nanorana1_27   | NW_017306510.1                     | 108787097            | XP_018412055.1                | 5                              |                             |
| type I       | Nanorana1_28   | NW_017306510.1                     | 108787096            | XP_018412053.1                | 3                              |                             |
| type I       | Nanorana1_29   | NW_017306510.1                     | 108787095            | XP_018412052.1                | 3                              |                             |
| type I       | Nanorana1_30   | NW_017306510.1                     | 108787094            | XP_018412051.1                | 3                              |                             |
| type I       | Nanorana1_31   | NW_017306510.1                     | 108787086            | XP_018412042.1                | 5                              |                             |
| type I       | Nanorana1_32   | NW_017306510.1                     | 108787124            | XP_018412090.1                | 4                              |                             |
| type I       | Nanorana1_33   | NW_017306510.1                     | 108787093            | XP_018412050.1                | 6                              |                             |
| type I       | Nanorana1_34   | NW_017306510.1                     | 108787092            | XP_018412049.1                | 8                              | Gene ID: 3 coding sequences |
| type I       | Nanorana1_35   | NW_017306510.1                     | 108787092            | XP_018412049.1                | 0                              | Gene ID: 3 coding sequences |
| type I       | Nanorana1_36   | NW_017306510.1                     | 108787092            | XP_018412049.1                | 3                              | Gene ID: 3 coding sequences |
| type I       | Nanorana1_37   | NW_017306510.1                     | 108787091            | XP_018412048.1                | 2                              |                             |
| type I       | Nanorana1_38   | NW_017306510.1                     | 108787090            | XP_018412046.1                | 3                              |                             |
| type I       | Nanorana1_39   | NW_017306510.1                     | 108787089            | XP_018412045.1                | 8                              |                             |
| type I       | Nanorana1_40   | NW_017306510.1                     | 108787088            | XP_018412044.1                | 2                              |                             |
| type I       | Nanorana1_41   | NW_017306510.1                     | 108787119            | XP_018412085.1                | 0                              |                             |
| type I       | Nanorana1_42   | NW_017306510.1                     | 108787087            | XP_018412043.1                | 2                              |                             |
| type I       | Nanorana1_43   | NW_017306510.1                     | 108787116            | XP_018412080.1                | 0                              |                             |
| type I       | Nanorana1_44   | NW_017306510.1                     | 108787111            | XP_018412073.1                | 4                              |                             |
| type I       | Nanorana1_45   | NW_017306510.1                     | 108787112            | XP_018412075.1                | 3                              |                             |
| type I       | Nanorana1_46   | NW_017306510.1                     | 108787120            | XP_018412086.1                | 1                              |                             |
| type I       | Nanorana1_47   | NW_017306510.1                     | 108787109            | XP_018412069.1                | 2                              |                             |
| type I       | Nanorana1_48   | NW_017306510.1                     | 108787117            | XP_018412082.1                | 2                              | K117 ortholog               |
| type I       | Nanorana1_K18  | NW_017307321.1                     | 108796078            | XP_018422969.1                | 1                              |                             |
| type II      | Nanorana2_K80L | NW_017307900.1                     | 108799101            | XP_018426427.1                | 5                              |                             |
| type II      | Nanorana2_02   | NW_017307900.1                     | 108799102            | XP_018426428.1                | 0                              |                             |
| type II      | Nanorana2_03   | NW_017307900.1                     | 108799100            | XP_018426426.1                | 3                              |                             |
| type II      | Nanorana2_04   | NW_017307900.1                     | 108799097            | XP_018426424.1                | 9                              |                             |
| type II      | Nanorana2_05   | NW_017307900.1                     | 108799098            | XP_018426425.1                | 5                              |                             |
| type II      | Nanorana2_06   | NW_017307530.1                     | 108797348            | XP_018424432.1                | 5                              |                             |
| type II      | Nanorana2_07   | NW_017307530.1                     | 108797347            | XP_018424431.1                | 4                              |                             |
| type II      | Nanorana2_08   | NW_017307530.1                     | 108797345            | XP_018424429.1                | 7                              |                             |
| type II      | Nanorana2_09   | NW_017307530.1                     | 108797344            | XP_018424428.1                | 5                              |                             |
| type II      | Nanorana2_10   | NW_017307530.1                     | 108797356            | XP_018424444.1                | 4                              |                             |
| type II      | Nanorana2_11   | NW_017307530.1                     | 108797342            | XP_018424426.1                | 2                              |                             |
| type II      | Nanorana2_12   | NW_017307530.1                     | 108797355            | XP_018424443.1                | 8                              |                             |
| type II      | Nanorana2_13   | NW_017307530.1                     | 108797352            | XP_018424442.1                | 5                              |                             |
| type II      | Nanorana2_14   | NW_017307530.1                     | 108797349            | XP_018424436.1                | 5                              | isoform x3                  |
| type II      | Nanorana2_15   | NW_017307530.1                     | 108797351            | XP_018424441.1                | 1                              |                             |
| type II      | Nanorana2_16   | NW_017307530.1                     | 108797341            | XP_018424425.1                | 1                              |                             |
| type II      | Nanorana2_17   | NW_017307530.1                     | 108797350            | XP_018424440.1                | 4                              |                             |
| type II      | Nanorana2_18   | NW_017307530.1                     | 108797339            | XP_018424423.1                | 13                             |                             |
| type II      | Nanorana2_19   | NW_017307530.1                     | 108797340            | XP_018424424.1                | 8                              | sequence incomplete         |
| type II      | Nanorana2_20   | NW_017307321.1                     | 108796077            | XP_018422968.1                | 4                              |                             |
| type II      | Nanorana2_K8   | NW_017307321.1                     | 108796080            | XP_018422973.1                | 0                              |                             |

Notes: Names indicate the keratin type and the position of the gene in the cluster, unless a name is suggested by GenBank.

Genome assembly used for predictions: ASM93562v1 (GCF\_000935625.1).

**Supplementary Table S12. Number of cysteine residues in keratins of the axolotl (*Ambystoma mexicanum*)**

| <b>Keratin type</b> | <b>Name<sup>1</sup></b> | <b>cDNA sequence (acc. nr.)<sup>2</sup></b> | <b>Number of cysteine residues</b> |
|---------------------|-------------------------|---------------------------------------------|------------------------------------|
| type I              | K17L                    | isotig63037                                 | 1                                  |
| type I              | K9L                     | isotig132511                                | 2                                  |
| type I              | K15L1                   | istog85088                                  | 0                                  |
| type I              | K15L2                   | contig317039                                | 2                                  |
| type I              | K15L3                   | contig327242                                | 2                                  |
| type I              | K19L                    | isotig36490                                 | 0                                  |
| type I              | K24L1                   | contig365045                                | 1                                  |
| type I              | K24L2                   | isotig29543                                 | 0                                  |
| type I              | K24L3                   | JK974491.1                                  | 1                                  |
| type I              | K24L4                   | isotig81597                                 | 4                                  |
| type I              | K18L1                   | contig330148                                | 0                                  |
| type I              | K18L2                   | contig321256                                | 1                                  |
| type II             | K80L                    | isotig85003                                 | 0                                  |
| type II             | K7L                     | isotig199907                                | 3                                  |
| type II             | K5L1                    | isotig198655                                | 1                                  |
| type II             | K5L2                    | isotig204938                                | 1                                  |
| type II             | K5L3                    | isotig64160                                 | 0                                  |
| type II             | K5L4                    | isotig122526                                | 4                                  |
| type II             | K8                      | isotig64108                                 | 2                                  |

Notes: <sup>1</sup> Preliminary names were given according to orthology to human proteins.

K, keratin; L, like.

<sup>2</sup> Sequences from: <https://ambystoma.uky.edu/quick-links/blast> - tBLASTn on V4.0-isotigs+Contigs

**Supplementary Table S13. Number of cysteine residues in keratins of the caecilian (*Microcaecilia unicolor*)**

| <b>Keratin type</b> | <b>Name<sup>1</sup></b> | <b>Protein<br/>(GenBank acc. nr.)</b> | <b>Number of cysteine residues</b> |
|---------------------|-------------------------|---------------------------------------|------------------------------------|
| type I              | K23                     | XP_030077854.1                        | 2                                  |
| type I              | K117                    | XP_030076825.1                        | 0                                  |
| type I              | K17L                    | XP_030076598.1                        | 1                                  |
| type I              | K19L                    | XP_030076445.1                        | 0                                  |
| type I              | K15L                    | XP_030076444.1                        | 2                                  |
| type I              | K24L1                   | XP_030077816.1                        | 1                                  |
| type I              | K24L2                   | XP_030077793.1                        | 1                                  |
| type I              | K24L3                   | XP_030077100.1                        | 2                                  |
| type I              | K24L4                   | XP_030077098.1                        | 2                                  |
| type I              | K24L5                   | XP_030076687.1                        | 1                                  |
| type I              | K24L6                   | XP_030076596.1                        | 1                                  |
| type I              | K24L7                   | XP_030076337.1                        | 2                                  |
| type I              | K24L8                   | XP_030076336.1                        | 4                                  |
| type I              | K24L9                   | XP_030076250.1                        | 1                                  |
| type I              | K24L10                  | XP_030076248.1                        | 1                                  |
| type I              | K24L11                  | XP_030076246.1                        | 1                                  |
| type I              | K24L12                  | XP_030076243.1                        | 1                                  |
| type I              | K20L1                   | XP_030076749.1                        | 1                                  |
| type I              | K20L2                   | XP_030076338.1                        | 1                                  |
| type I              | K18L1                   | XP_030066300.1                        | 4                                  |
| type I              | K18L2                   | XP_030061931.1                        | 3                                  |
| type II             | K80                     | XP_030054078.1                        | 3                                  |
| type II             | K7L                     | XP_030054077.1                        | 2                                  |
| type II             | K5L1                    | XP_030054076.1                        | 1                                  |
| type II             | K5L2                    | XP_030054074.1                        | 4                                  |
| type II             | K5L3                    | XP_030054073.1                        | 3                                  |
| type II             | K5L4                    | XP_030054072.1                        | 2                                  |
| type II             | K5L5                    | XP_030054071.1                        | 2                                  |
| type II             | K5L6                    | XP_030054068.1                        | 6                                  |
| type II             | K5L7                    | XP_030054066.1                        | 5                                  |
| type II             | K5L8                    | XP_030054064.1                        | 5                                  |
| type II             | K5L9                    | XP_030054063.1                        | 3                                  |
| type II             | K8                      | XP_030054059.1                        | 1                                  |

Notes: <sup>1</sup> Keratins were named according to orthology to human proteins.  
K, keratin; L, like.

Genome sequence assembly: ASM69896v1 (GCF\_000698965.1).

**Supplementary Table S14. Number of cysteine residues in keratins of zebrafish (*Danio rerio*)**

| Name <sup>1</sup> | Protein<br>(GenBank acc. nr.) | Number of cysteine residues | Notes                   |
|-------------------|-------------------------------|-----------------------------|-------------------------|
| Danio_26CYS       | NP_001002392.1                | 26                          | alternative name: krt95 |
| Danio_02          | NP_001003480.1                | 0                           |                         |
| Danio_03          | NP_001017588.1                | 2                           |                         |
| Danio_04          | NP_001034908.1                | 0                           |                         |
| Danio_05          | NP_001035449.1                | 4                           |                         |
| Danio_06          | NP_001038375.1                | 2                           |                         |
| Danio_07          | NP_001070122.1                | 4                           |                         |
| Danio_08          | NP_001070922.1                | 0                           |                         |
| Danio_09          | NP_001076492.1                | 1                           |                         |
| Danio_10          | NP_001096111.1                | 0                           |                         |
| Danio_11          | NP_001107814.1                | 0                           |                         |
| Danio_12          | NP_001186881.1                | 0                           |                         |
| Danio_13          | NP_571182.1                   | 0                           |                         |
| Danio_14          | NP_571183.1                   | 1                           |                         |
| Danio_K4          | NP_571584.2                   | 0                           |                         |
| Danio_K5          | NP_571231.2                   | 0                           |                         |
| Danio_K8          | NP_956374.1                   | 1                           |                         |
| Danio_K17         | NP_001076574.1                | 0                           |                         |
| Danio_K18         | NP_848524.1                   | 0                           |                         |
| Danio_K18b        | NP_956862.1                   | 1                           |                         |
| Danio_K24         | NP_998688.2                   | 0                           |                         |
| Danio_K91         | NP_001003445.1                | 0                           |                         |
| Danio_K92         | NP_001017824.1                | 0                           |                         |
| Danio_K97         | NP_001002383.1                | 0                           |                         |

Notes: <sup>1</sup> Danio\_26CYS contains 26 cysteine residues. Other keratins were numbered arbitrarily or according to GenBank.  
Genome sequence assembly: GCF\_000002035.6

# A

>Chicken\_K12

MDCGSPICFALLRAWQNSPALWSTMALSVRSSVGRPQFSSRSSLGGGSLRLSGNSTGGGFGGSGLGFGGG  
SAGGFGAASVLSGSGSFGGFGSSVGSFGGGFASGSGGGYGSFGGGFGGGFGSGSGSIIFGGGFG  
SGAAPGLGGGFGIGGGDGLLSGSKKTMQNLNDRALAYLDKVRSLDANTELEKIREWYEKNGPGAA  
VPGSGNDYSKYYPITIEDLRNKIINATIDNARIILQVDNARLAADDFRLKYENEVALRQSV EADINGLRRV  
LDELTLTRADLEMQIESLNEELAYLKKNHHEELQGLQSSAVGQVSVEMDAAAPGIDLTKLLNDRMRGQYEV  
AEQNRKEAEAWFNEKSGELKREISTNTEQLQSGKSEITDLKRTLQNLIELQSQLAMKKSLEDTLAETEG  
GYCAQLSQMQLQIGNLESQQLQVRADMERQSAEYQQLLDIKSRLEMEIETYRRLLDGEFVSGGQGVVFE  
SSTLGSKSQTQSLDSSQDPTKTRKIKTIVEEVVDGKVVASHVKEVEEKI

>Chicken\_K20

MSFSTQSSQLGTAHQLGTAPGGALSVRSAAVQRIQAPSVMYGGAGGYGTRISSSSVRRQSSSGAFHSNI  
SDNDLLSGNEKSTMQNLNDRALAYLDRVSRLEKANSLEKQIKKEWHEKNTVGVRSYSSYFQTIEDLQS  
KIGAAQLENAKLVLIQIDNAKLAADDFRLKYENELLLRQSVESDINGLRLVLDLTLTKSDLESQIENVNE  
EIVFLKKNHEEVDRLRQVGGSVNVEVDAAPGTDLASIMENMRQYEMAENRQEAERFERFEKQTEALN  
QEVAINVEQLQEQRRVETDRRQICQSLELELQTHLNMKPLEDTLAETEARYSFQLAQIQETIAKLEAQL  
RQLRADMEAQNTEYSVLLDIKTRLELEIATYRRLLEGEDVGLVQEDAVTELEKESKIKKIKTIVEEVI  
DGKVVSSQVKEIEEKI

>Chicken\_K23

MSTSQQPFQFYSGLRGSAGGLAQOQTSYRPPSADGASGTHTSFSSSTRPLSLAAGGASWGC FGEHHE  
SIFLGGNEKQTMQNLNDRALAYLDKVRSLAANAQLESCILEWHKTKSHGKRHDFNQYEQNVTDMQRQIE  
DGKITNASILLQIDNANMASEDFRLKYEAEKTRRQGVQCDLENLRKELDGLTIIITDLEMEIEGLREEHI  
LRRKDHEEDMEANRSSQDFKVNKVNAPPPEDLTKILAEIREDYEAIEKNRQSLDSWYKELSTAVSLAA  
DPNPEQVQSSENEIKDLTRTLQSLDIELQAQMSKKHMLDRTLADTRNYAVALQNMQQTISKCEEELS  
RHDIRQQHNYRVLGKIKTRLEKEISTYRLLLEGNVDRI TRTCEKAEYAEALTNGKIKAI VHDSMNGQL  
LSSTTAIHQEE

>Chicken\_K15

MTTYTVQNSFASGAGGLGAAGSGSSRLSSVRVGGSYRTPSIHGGSGGRGVSISSTKYVSSVGGYGGGSC  
AGFGGGYGGYGGFGGGAVCGGGGAGFGGGFDAICAFGGGDGLLSGNEKITMQNLNDRALATY LQKVRAL  
EDANAEEVVKIRDWYQKEAPSSPARDYSNYKI IEDLQDKILAAITDNSRVVLEIDNARLAADDFRLKHE  
NELFLRQSVESDINGLRRVLDLTLSRADLEMQIESLKEELAYLKKNHHEEMKEYSNQLSGKVSVMEMDAA  
PGIDLTRILSEMREQYALAEKRYKDAEAWFLQTTELNHEVATHTEIQSSKSEITELRRTMQSLEIEL  
QSQISMKAGLEANLRDTEGRYCAQLAQIQNLITSVEEQLSEIRCDMERQNEYRMLMDIKSRLEQEIATY  
RQLLETQDSQMSGVNPKDASAAGRARGGTEDEGRSSSTRDRRHQ

>Chicken\_K19

MATYSFRQTTSSVAGGPCGRSLRLGGGFRAPSIHGGSGGRGVS VSSARFVSSGLGSLGGYGGAFSS  
FSAGFGGGYGGGLGSGDGLLSGNEKITMQNLNDRALASYLDKVRLEEANS DLETKIREWYLKQGP GPARD  
YSPYYKATIEDLRDQILAATIDNSKVVLIQIDNARLAADDFKTKFETE QALRMSVEADINGLRRVLDLTLA  
RTDLELQIENLKEELAYLKKNHHEEMSA LGGQVAGQSVSEVDSAPGIDLSKILADMRDQYEHMAEKNRKD  
AEAWFHSKTEELNREAVNTEQLQSSKSEVTDLRRTLQGLEIELQSQLSMKGALESTLADTEGRYGAQLA  
QIQDMIGSIEAQLAELRADMERQNSEYKMLMDIKTRLEQEIATYRQLLEGGQESQLFGSLSGSPDKRDKPA  
DGK

>Chicken\_K9L1

MSCSIKRTSSTSYRSGGGGICGGAGGRSSSTSCRRYASSVIGGGSSAGGACGIGYGGGMSAGSLAGGF  
GGGGGGFAGSFGAGGDILLSGNEKITMQNLNDRALASYLDKVRLEEDNAQLELHIREWYRKQAPSV  
SKDYSSYYQTIEQLQNIISATVDNNRMLLDIDNSKMTADDFRMKYENELVIRQSVESDVNGLRNLDDL  
THTRSSLESELESLEKELIALKRNHEEELRQLQSQGTGGDVSVVEVNAAPGEDLTKILNDRNEYEQIIEKN  
RREVEQWYEVKIEEVNRQVTSSSQDIQTSSSHQLTELKREMQLIEIELQAQLSTKNSLENSLAETESRYGC  
LLQQIQGQINSVEEELANIRCEMEGQNEYKMLLGIKTRLEQEIATYRQLLEGGQESQLFGSLSGSPDKRDKPA  
YSSYSYSHGQSGGDKSQTRVC

>Chicken\_K9L2

MSCSIKRTSSTSYRSGGGGICGGAGGRSSSTSCRRYASSVIGGGSSAGGACGIGYGGGMSAGSLAGGF  
GGGGGGFAGSFGAGGDILLSGNEKITMQNLNDRALASYLDKVRLEEDNAQLELHIREWYRKQAPSV  
SKDYSSYYQTIEQLQNIISATVDNNRMLLDIDNSKMTADDFRMKYENELVIRQSVESDVNGLRNLDDL  
TLVRSSLESELESLEKELIALKRNHEEELRQLQSQGTGGDVSVVEVNAAPGEDLTKILNDRNEYEQIIEKN  
RREVEQWYEVKIEEVNRQVTSSSQDIQTSSSHQLTELKREMQLIEIELQAQLSTKNSLENSLAETESRYGC  
LLQQIQGQINSVEEELANIRCEMEGQNEYKMLLGIKTRLEQEIATYRQLLEGGQESQLFGSLSGSPDKRDKPA  
SSQSYSSSSFSQSQSGDVTGQSRVC

>Chicken\_K9L3

MSCGTKSSSTTRISSGGCGSGSGGGGGSSCGIRKSGGYSSVSTRKYTSSGGSGGFSGRTFGGGG  
KSSYGGGFSSGCGRIGRSSYGRMSSGSGGGMGGMGGYGGGFGGSGGGYGGGGFGGGSGGYSGG  
GFGSGGSGGFGGSGYGGGSGFGVGFGE DSGLLSTNEKLTMQNLNDRALASYMDKVRGLEEENAHLERLIR  
EWYKQGP TGSKDYSQYRTIEELQNIIVGANVDLNRMLLDIDNTRMTVDDFRLKYETEYTLHQSVASDI  
NGLRPLLDQLTLRSDELQTFESLKEELIY LKKNHHEEMRGLQTSQSGDVNVEVNA TPNTNMEKLNEMR  
CEYERLIENNRREVESWYETKMEEVNQVHSSGQEIQSSNQIISELRREYQSLEIELQSQLSMVDSLQSN  
LEDTERRYNMQLQQIQMIGPLEEELASIRCEMESQNEEYKMLLGIKTRLEQEIATYRQLLEGGQDLVIG  
PAGGMGGMGGGRIGGGGFGGGRGGSGSICGGMGGIGGGSGGIGGGSGGIGGGSGGIGGGSGGSCIIIG  
GGSGGGGRTSGGVSSSHSYSSSSQSQSCRGGGESQGYGRKSF



>Chicken\_K9L4

MSCSRSSSSCLRGGSGGSQHGSASAHRYTASRAGGRPAGGSCSGSSRSSCGATGFGRMRSSSYGGGMSS  
GMGGSSYAGGWSAGTYGTMRCGGMGGFAGAGSGFGAGYGGGFGSGSAGFSAGSFGGGGFGENMGILS  
NNEKLTMQNLNDRLASYLKVRSLERENARLEQLIREWYQKQGPTRKDYSHYTTIEDLQNLITAAVE  
TNKILLDLNTRMTAEDFRTKYTEYGLRQNVADINTLRPLDLSLTLSRTDLEMQFESLKEEMINLKKD  
HEEDMKSILQTSQSGDVNVEVNAAPGEDLLKLNDRMQEYEQI IQKNREEVESWYESKMEEVSVQVHSSGQ  
ELESSNQIISVLRDYSLEIELQSELNRVQALQSNLEDTERRYNMQLOIQGMIGPLEEELASIRCEME  
SQNEEYKMLLGIKTRLEQIEIAQYRALLNEGQHGISTSQGGAGGSSGGHGHGGTSGSSAQGGSGGSSWC  
SRGRSSGGSGGKTSGGGGGGCGKASGGGGGGGGEGGKCLSRSSSSHSQSGSCESPGSRFRSEH

>Chicken\_HAS1

MSCNIKETITVSSKGRSSGGSCIGGGGARISSYAIIGSRGFSGRSYCGGVNYGGGLSVGSLAGGSYGG  
GNCYGNLGLGFLGGGVVVGGLSDCLLSSCDEKVTMQNLNDRLASYLKVKCLEKENAELECRIREWYAT  
QGLSCEPRDYSCYKEIEDLQNLIVCATIDNNKI ILDIDNSRMAADDFRVKYETELALRQSV EADINGLR  
QVLDQLTLCRSDLEAQLSREELCCLKNHEEEMNCLRKQSTGDVSVVEVNACPGPDLRQIILEDLRCQYE  
TLIARNRKEVEDWYECKIEEVNREVITSGQEVETCENNQVTELRRQLQALEIDLQAQLSQRNNLESSLAET  
EQQYNTLLGELQNLQITCVQQLAEIRAEIECQNEQYKTLLDVKCRLEQEIQT YRCLLEGGQQLIHGGGI  
GVGSGVGGGVIRTSHYTTTTTASHCQPQVPCKTGDIVTCRRICD

>Chicken\_HAS2

MSSVSSGRYTTTCGIGGSRGFSGRSYCGGVNYGGGLSSGSLVGGSYGGGLGAAVLGGCSGIGFSGGSARFG  
GGIGGGGLISLGGGVVGGGFGSDGILLSGDEKVTMQNLNDRLASYLKVKRCLEQENADLECRIREWYAKQ  
GPFCEPRDYSCYKEIEDLQNLIVCATIDNNKI ILDIDNSRMAADDFRVKYETELALRQSV EADINGLRQ  
VLDQLTLCRSDLEAQLSREELCCLKNHEEEMNCLRKQSTGDVSVVEVNACPGPDLRQIILEDLRCQYE  
LIERNRKEVEDWYECKIEEVNREVITSGQEVETCENNQVTELRRQLQALEIDLQAQLSQRDNLESSLAETE  
CRYNHNLGELQNLQITCVQQLADLRAEMECQNEQYKILLDVKCRLEQEIHTYRCLLEGGQQLIQGGIG  
QLSGLGGGVARTGGIGGGGI IRTSHYTTSSAQMPSCAAAEIQVPCRRICD

>Chicken\_HAS3

MSCAQCCGTRGSAGSWAGTTQSSASPRQAAAFELAAAARGFSGGSLGEGLLGQQLGAGSMSGGSGFATQ  
RACSTLGFSTGGICVRGTGSGFRAGEGILFANNEKATMQNLNDRLASYLKVKRLESENAELECRIREWY  
AKVGPSCPEPRDYSCFHKEIEDLQNLIVCATIDNNKI ILDIDNSRMAADDFRKYETELALRQSV EADICN  
LRPVLQDLASCKADLQCEAVTEEMCCLRANHEEEMNCLRKQATGDVSVVEVNACPGPDLRQIILEDLRCQ  
YETLMERNRKEETEQQWFAKVEEVNLEVITSSQEI ESSNKQVTELRRQLQGLEINVQAQLTMKENLESSLA  
ETECRYNKYLSLELQSLQITCVQQLAEIRAEIEMECQNEQYKILLDVKCRLEQEIHTYRCLLEGGQQLISTCS  
TSGTGTHGTTLRGRHCSARRPHLG

>Chicken\_K14L1

MSTTVRQFSSSTSLKGLGGSSRLSCGRAAGYRAPSVMHGGSSSYSVSSRIVSGLGAGYGGGYCSSLVGGGL  
GGGFGASYGAGYAGFGGGFAGFGGGFGGGDILPAGEKETMQNLNDRLAAYLDKVRLEEAANTDLEVK  
IREWYKQKQGPBERDYSPPYRTIEELRSKILAAATVENANIVLQIDNARLAADDFRTKFEQALRLSVEA  
DINGLRVRLDELTLRADLEMQIENLKEELAYLKNHEEEMNLRGQVGGEISVEMDAAPGIDLTKILAE  
MREQYESLAEKNRRDAEQWFFSKTEELNREAVNTEQLQSGKTEITELRRTIQSLEIDLQSQSLSTKAALE  
GTLADTEARYGTQLAQLALITSVVEQLAELRCDMERQNHAYRVLDDVKCRLEQEIATYRRLLEGEDAHI  
SSQYSSAMSSHSGRDAITTSRQVRTIVEEVQDGKVVSSREQMALTR

>Chicken\_K14L2

MSTTVRQFSSSTSLKGLGGSSRLSCGRAAGYRAPSVMHGGSSSYSVSSRIVSGLGAGYGGGYCSSLVGGGL  
GGGFGASYGAGYAGFGGGFAGFGGGFGGGDILPAGEKETMQNLNDRLAAYLDKVRLEEAANTDLEVK  
IREWYKQKQGPBERDYSPPYRTIEELRSKVLGATVDNANLLQIDNARLAADDFRTKFEQALRLSVEA  
DINGLRVRLDELTLRADLEMQIENLKEELAYLKNHEEEMNLRGQVGGEISVEMDAAPGIDLTKILAE  
MREQYESLAEKNRRDAEQWFFSKTEELNREAVNTEQLQSGKTEITELRRTIQSLEIDLQSQSLSTKAALE  
GTLADTEARYGTQLAQLALITSVVEQLAELRCDMERQNHAYRVLDDVKCRLEQEIATYRRLLEGEDAHI  
SSHYASQPVKEGPTTRQIRTI FEEVQDGKVISSREQITQAAAL

>Chicken\_K18

MSLSRSTTFSTSSRTGSIIRLGPSSAASVYAGAGGSGSRISITRTASTYGGYGGYGGYGGYGGYGGYGGY  
LLSGSGVVQNEKETMQDLNERLATYLEKVRSLENNRRLEAQIRESLAKRGPSTRDWGNYWDTIQQLRDK  
IYDSAVENARTVLQIDNARLAADDFRVKYEAELAIRTSVESDISGLRQVLDLDTNMARLQLEGEIEALREE  
LIFMKNHEEEMNLRGQVGGEISVEMDAAPGIDLTKILAE  
MREQYESLAEKNRRDAEQWFFSKTEELNREAVNTEQLQSGKTEITELRRTIQSLEIDLQSQSLSTKAALE  
GTLADTEARYGTQLAQLALITSVVEQLAELRCDMERQNHAYRVLDDVKCRLEQEIATYRRLLEGEDAHI  
SSHYASQPVKEGPTTRQIRTI FEEVQDGKVISSREQITQAAAL

>Alligator\_K24

MSVWLSGSRWISSPACGGGSKMTGTGGSFDTGSCVCGFGGGSHPGFSTGLTRGAGGGFSGGYGGGFGSI  
SAGGSYGGTLCSSSFGGLGTGFGGGFGGPDSNLLSGGEKETMQNLNDRLANLYLDKVVHAALEANADLEYKI  
HQWYKHPAAAEELTRDYSKYQI IEDLRNQIISATIGNASIVLQIDNSQAAEDFRKYENELFLHRV  
EADSNGLRRVLDLTIKSNLEAQLSLELTELVLKKSHEEEMKSLKSTSTGDVNVEINAAPGIDLTKLL  
NDMRAQYESLAEQNRREAEQFNKMSQPLQKQIYDDAGAVSSATNELTEMKRTIQGLEIELQTVMAQKCS  
LEGTLARTEENYSAQLSQRQLHISNLEEQLQIRSEMERCQNAEYEQLLGKIRLEMEIETYKRLLDGEGG  
FGSGGYGHQESRVQIKEPYKTQVIKTIVEELVDGKIVSSEVKSVKEKPVK

>Alligator\_K10L

MSFFGCGSRQISSCHTGGAMKIPCWGVYGLGGGSLGMYETGGNWCGLGWGGIGGGTAGSFHNFSYGA  
VGNSSDGRLLFGGEKETMQNLNDRLASYLKVKQALEANAELHKKIDWYETLGSYTEGGSRDYSKYTT  
TIEDLRNQIIAATVENASII LQTDNARLAVDDFKVKYENELYLRQNV EADIRGLRQVLDLQTLAKSNLEI  
QIESLADEVAYLKNHEEEMNDRSSASPDVNVEINTAPGIDLTRLNKMRTEYEAALAEQNRKDVETWFN

EKSKELVQINFSAEETNTNKSQITELKRTFQGLEIEMKSQLALKQSLEATLAETEARYCAQLSQIQVVI  
SSVETQIQIRDDMEWQNAEYEQLLDIKIHLENEIETYRHLIDREESDSGYDTAGTGSGLRGTGSATTSG  
SQGSVSAADLGRSGSARSSESSSSSSKPKTKTRVIKTIIEELDQHGTVTSSKQVSVEEKPII

>Alligator\_K12

MALSVRTGGGSRQFSSRSALGGGSIIRLFNNSGGGSGFSSGFGGGSSGGFVASLLGSSSGFSGGFGSG  
SGGGLGSGFGGGGFGGGSSGFGGGVGNISFGGGFGGGSGAGFGGGLGNAFGGGFGGGSGAGFGSGFGAGGG  
SGDGGLLSGTKKTEMQNLNDRLAAYLDKVRSLLEEANTELEHKIREWYEKNGPGAGSLGAGNDYSKYPII  
EDLRNKIINATIDNARIVLQIDNARLAADDFRLKYENEVALRQSV EADINGLRRVLDLTLTRADLEMQI  
ESLNEELAYLKKNHHEEELQGFQGNATGQVSVEMDAAPGIDLTKLLNDRMRGQYEAIAEQNRKDAEAWFNEK  
SGELKKEISTNTEQLQSGRSEITDLKRRLQSLIEIQLQSLAMKKSLEDTLAETEAGYCTQLSQMQLQIGN  
LENQLFQVRADMERQNAEYQQLLDIKTRLEMEIETYRRLDGEFGTGGQGLSFESSSLTGSKSQTSLDS  
SQDPTKTRKIKTIVEEVVDGKVVSSQVKEFEEM

>Alligator\_K20

MAFSTRSFHRSTSSTFQAPAPSLSSSAYRKIGIQKYQAPSVYGGAGGYGTRISTSTKYGGGFGTGSNTF  
QFNVIQNDLQFAGNEKLTQNLNDRLASYLEKVSLEKTNQLEKQIREWYANNSSSTRQDYSPIYNTIEE  
LRNKIGAAQLENARLILQIDNAKLAADDFRMKYESELAIRQGAENDTAGLLKVIDDLTLTKADLESQVEG  
MTEELAFLLKKNHEEVDRLRKLQGGTVNVEVDAAPSIDLAKIMENMRQYQESMAQKNRQEAADRFRQTE  
ELNQVVAVNTEQLNSKKEITIDLKRTRFQSLIEIQLQSLMKALEDTLAETEARYGSLLAQIQAAIGNVE  
GQLVQVRADMERQNEYNILLDVKTRLEMEIATYRRLLEGEDIGSRQSELSKAEYEKEINKIRIKITVVE  
EVDVGKVVSSKVEIEEEM

>Alligator\_K23

MSSSQGPFQFSSGSLRSTARYNLAHIESFYRPSSTGAGVSSMHASLFSTRPPGVGASWGSTGASHGDSIF  
LGGNEKQMMQNLNDRLAAYLDKVRSLAANAQLESCEIVEWHKRRSHGKRYDFNQFEQS IADMQQIQDQK  
ISNASVLLQIDNAKLASEEFLRKYAEKYQREGVQFDVENLRKELDNLTIVTTDLEMEIEGLREEHILRK  
KDHEADMHEQRSTKDVNVNVKVKATPPEDLTKILAGIREDEYEAIEKNRRGLDVWYKQQTSAASLAVTNS  
PEQLQNNDKIEIKNLKRNFALEIELQAQLSKKHALENTLSETRAHYASRLQNIQEFISKCEEELSELRHD  
VRCQSNKYKVLGKIKTRLEREISTYQLLEGRTEITRNFESSAKEHTASTDHRKLTIVQDSVDGQVVST  
TIEIHHWQDLWKIVAKFGCLQKFITVVWQFYDGVLAHVVDKAFHECDTGIDISYQTEGKLFNLRRLQV  
KTKLQEVTVCDLLFFDDCCLNARSESDM

>Alligator\_K36L1

MLFKGCTPASTWGFIRSSCKVPYISCAKSVSVCSGIRSQLPASYSINYQPNICLPNLYCAAPYFSSSS  
QTNGNLLPTCLSPASVPSSCILSSARPINCYLDGSGYCRYNEAIFSSDGKETMQLLNDRLASYLEKVKSL  
KENTDLERKIREWQECQTPLVCTDFSSCYSTTEELQQIC SARAEARLRLDIDIVKVASDDFSFKYEYE  
CGLCQSAEADISSLHRFLDDTLCKTDLETELESLELLELCLRNHEEASPLRHQLGDCINVELDTAPS  
CDLNKQCEVEDWYHTQMEELNKEVISSEGEQLQYQNEI IQLKHTVQALEIDLQTT  
QHSLNTALESTLTDTEARYSHQLSELQCLISNMEAQLAELRSNIQHONSEYKVLDDVKSQLDCEISAYRR  
LDEEDCKAYHTSDTQTQIC

>Alligator\_K36L2

MTSNCCPDPCCGSFTDSCAPNSYTKSISDCSSDIKSLPTSFSTSSKSVSVSSRPGSSLVNSYQPTP  
CLPRKLVPRMGCSYAGSYCGYNESIFNSNEKETMQFLNDRLACYLEKVRHFLEQENADLEYKIREWYECQ  
TPYVYTFDFNCYKMIIEELQQQICCAKADNARLCLDNDLKVASDDYATKYEYEHGLCQSAEADVLSLRR  
ILDDTLCKADLETELESLELCLRNHEEASPLRRQLGDRINVELDAAPSCDLNKVLEEIRYQYE  
TLVDKNQCEVEDWYHTQMEELNKEVISSEGEQLQYQNEI IQLKHTVQALEIDLQTTQHNLNTALENTLAE  
TETHYSQQLSELQCLVSDVEVQLAELRSDIEHQDGEYKVLDDAKQQLDCEISVYHSLLDVEDCRLPNYP  
ANPGCAPSISAGGKPVWSEPIQSPVFPDCTPSIPAAEPNLIQPCCNPCAPTSPLTPGCALVTQISTQ  
IC

>Alligator\_K36L3

MTSKYCTHTISSRSGKGCVTGGAFPWLSSVCSSSPSRFPGLSYGGRNISASSVKLGSSGLGNWLPSSFL  
PSGYGPGFAGWCDEGIFNSNEKETMQFLNDRLACYLEKVRHFLEQENADLEYKIREWYECQVPYVCTDFQ  
AFYKTLLEELQQQILCAKTNNAKMVLQIDNARLAADDFRKTFESEQVIRQSVADADINGLRRIMDEFTLCRA  
DLEMQLESLEKELLCLKNHEEASVLRQCLGARVNVEVDAAPSCDLNKVLENEIRCQYENLVENNRKDV  
AWFSTKMEELNQQVSSGELQCCQTEITDLRRTIQALEIDLEAQTSMKSTLECTLHETENRYASQLAHL  
QCLITNVEAQLAELRCDIERQNEYMVLDDVKTRELEIATYRRLLEGEDCKLPSFPCVPDCAPPSQITT  
KIRTITEEIKDGRVVISRQVQCPPLVL

>Alligator\_K15

MATTFMRSSSSSYGGGGLGCGVGGGSSRVSSVRMGGSYRAPTIHGGSGGRNIAVSSARYASSVAGGYGG  
GLGSSLGGGYSYGGGYSYGGGSAFYGGGGAGGGYGGGFGGDFGGGFGGGLGGGDDGVLGSGNEKITMQN  
LNDRLASYLEKVRALAEANADLEVKIRDWYQKQGPTSPARDYSPYKTIEDLRDKILAATIDNSRIILEI  
DNARLAADDFRMKYENELYLRQSV EADINGLRRVLDLTLARADLEMQIENLKEELAYLKKNHHEEMREY  
SNQMTGKVSVEMDAAPGVDLTKVLAEMREQYEAALADKNRREAEAWFFTKTEELNREVAATSTEQIQTSKSE  
MTELRRTLQGLEIELQSLQSMKAGLEANLADTESRYCAQLAQLQAMITSIIEEQLAELRCDMERQNEQYKM  
LLDIKTRLEQEIATYRRLDGDQSLQSGGWAPKEAGFSSSSSIKVRVEDSVDGKVVSHDRKY

>Alligator\_K19

MSTFSLRPTTSSMSGVGRSSSIRFGGGYSRSPSIHGGSGGQVRVSVSSARFVSSGAGGGLGGYGGGFGSS  
FSGGFGGGFSGSLGGGDSLLSGNEKITMQNLNDRLASYLEKVRALAEANSELEIKIRDWYQKQGPSPSRD  
YSPYKTIEDLRDKILAATIDNSKIVLQIDNARLAADDFKTKFETEQLRLSVEADINGLRRLLDELTLA  
RTDLEMQIENLKEELAYLKKNHHEEMNAHAGQAGGQVSVVEVDSAPGIDLTKILAEMRDQYEFMAEKNRKD  
AEGWFNSKTEELNQEVAVNTEQLQTSRTEITDLRRTLQGLEIELQSLQSMKAALLEGTLADTENRYGAQLS  
QIQCLISNIEAQLGLDRAEMERQNESEYKMLMDIKTRLEQEIATYHQLLEGQDSQLFGLSGTTDSKRGGK  
DK

>Alligator\_K9L1

MSCSIKKTSSCSYRSRSGGGGFGSCGGSSSISTKKYTSSVAGGSTYGGGRLGGGSYGGGACSIYVGGGVSGGSIGGGQGSFAFCGGYGGGFGGGFGGGGDALLTGNEKTTMQLNDRLATYLDKVRRLLEENADLEE RIREWYRKQGPSISKDYSFYYQTIEQLQNIISATVDNNKLIILIDNSKMIADDFRMKYENELAIRQGV EADINGLRNLFLDELVRVRSLELEVEITLKDLELLTKKNHEEEMRLLQSQTGGDVNVEVNAAPGQDLTKILN DMRQYEEI IAKNRREVQWYEVKMEEVNQVTSQGVEVQTSSSHQLTELRRVFSLEIELQTLQSMKASL ENNLAETEARYGAQLQIQAMINCVEEELAQLRCEMESQNOEYKMLLGIKTRLEQIEAQYHGLLQEGQQD ITSSQGGIQGGGRSSQSYSSHS CSSTSHSQSHGEMTGQTRPC

>Alligator\_K9L2

MSCGIKSSSSSRISISGGGGGGGGGRRRCVGYSSVSSRKYTSSGRSGGGGFGSRSYGGGSRSSYGGG FSSGSCGRISRSCYGGRISGGSFGPSGGGICGGYGGGAGGFGGGGAGFGGGYGGGLGPCFGGSGGFSGG SFGGGFGSGGSFGGGFGSGGSFGGGFGSGGSFGGGFGSGGSFGGGFGSGGSFGGGFGSGGSFGGGFGSGG SFGGGFGSGGSFGGGFGSGGSFGGGFGSGGSFGGGFGSGGSFGGGFGSGGSFGGGFGSGGSFGGGFGSGG SFGGGFGSGGSFGGGFGSGGSFGGGFGSGGSFGGGFGSGGSFGGGFGSGGSFGGGFGSGGSFGGGFGSGG SFGGGFGSGGSFGGGFGSGGSFGGGFGSGGSFGGGFGSGGSFGGGFGSGGSFGGGFGSGGSFGGGFGSGG SNNKMTMQLNLERLASYLKVRHLEENANLERLIREWYQNHGPPCGRDYSQYYGPIEDLQNIISATV DLNKVLLDIDNTRMTADDFRIKYETEYSLRQNVVEGDINGLRPILDQLTLARSDLEAQYELSLKEELISLKK NHEEEMRGLQSQSGGDVNVEVNTTPDSNLMQKLNEMRCEYEQI IENNRKEVERWYETKMEEVNQEVHTSG QEIQSSNHQVSELRRDYQTLIELQSQLSMVQSLQSNLEDTERRYNIQLQIQNTITTTVEEELANIRCEI ESQNYEYKMLLDIKCHLEQIEAQYRALLEEGQQDIGNQQGRRGGGGFSGYGGIRGGSIGGGGSGGGTIG GTCIGGGIGGGGIGGGGIGGGGIGGGGIGGGGIGGGGIGGGGIGGGGIGGGGIGGGGIGGGGIGGGGIGGGG IYSSSSSHGISSSS

>Alligator\_K9L3

MSCGIKSSSSSRISISGGGGGGGGGRRRCVGYSSVSSRKYTSSGRSGGGGFGSRSYGGGSRSSYGGG FSSGSCGRISRSCYGGRISGGSFGPSGGGICGGYGGGAGGFGGGGAGFGGGYGGGLGPCFGGSGGFSGG SFGGGFGSGGSFGGGFGSGGSFGGGFGSGGSFGGGFGSGGSFGGGFGSGGSFGGGFGSGGSFGGGFGSGG SFGGGFGSGGSFGGGFGSGGSFGGGFGSGGSFGGGFGSGGSFGGGFGSGGSFGGGFGSGGSFGGGFGSGG QNHGPPCGRDYSQYYGPIEDLQNIISATVDLNKVLDDIDNTRMTADDFRIKYETEYSLRQNVVEGDINGL RPILDQLTLARSDLEAQYELSLKEELISLKKNHEEEMRGLQSQSGGDVNVEVNTTPDSNLMQKLNEMRCEY EQI IENNRKEVERWYETKMEEVNQEVHTSGQEIQSSNHQVSELRRDYQTLIELQSQLSMVQSLQSNLEDT ERRYNIQLQIQNTITTTVEEELANIRCEIESQNYEYKMLLDIKCHLEQIEAQYRALLEEGQQDIGYVND

>Alligator\_K9L4

MSGGSFGPSGGGICGGYGGGAGGFGGGGAGFGGGYGGGPGPCGFGGSGGFGGGGFGSGGFGGGGFGSGG GGFSGSFGSGGSFGGDDTGLLSNNEKMTMQLNLERLASYLKVRRLLEENANLEQLIREWYQKQPQGGR DYSQYKTIEDLQNIISATVDLNKVLDDIDNTRMTVDDFRKLYETEYGLHQNVESDINGLRPMLDQLTL ARSDLEAQYELSLKEELISLKKNHEEEMRGLQSQSGGDVNVEVNAAPGTLNTEKLNEMRGEYERLIENNR EVESWFEAKMEEVNQVHSSSQEMESSNQVSELRRDYQTLIELQSQLSMLQSLQSNLEDTERRYNMQL QQIQAMIIPVEEELANIRCEMESQNEEYKMLLGIKTRLEQIEAQYRALLEEGQQDIGNQQGSGGGYSSGG IRGGSIGGVVPDATASQDVEYERKWTLD

>Alligator\_K9L5

MSCSFKHTSKSYSLGGGCGRGGGFSSSSCRRYASSRASGGGFSRSRSGGGSARCGYGGSYGGMSSRSY SGIGGFGCGSGGGFGGGSTGFGGGSTGFGGGSIGFGGGNFGGGGFGGGDDTGLFSNNEKMTMQ NLNERLASYLKVRRCLEEDNLQLERLIREWYQTHGPQGGKDYSHYYGPIEDLLNQIVLATVANNKIILDL DNARMTAEDFRMKYETEYSLRQSVVEGDINGLRPVLNLTAKSDLEMQFSLREELIQKKNHQEEMSSL QSESGGDVSVVEVNAAPGEDLMGKLNEMRKEYEYI IQRNREEVERWYESKMEEVNRHEVHTSGQIEISGNQQ VSELRRYQRLEIELQSQLSTLQSLQSNLEDTDYRYNMQLQIQNMIIPVEEELASIRCEMESQNEEYKM LLGIKTRLEQIEICQYRELLDEGQHDIGYIQGGGGRGGHGGVSWSSAGGSGGGGSGWSSCGGGTSSWS GGGCGTGTGDRSCSKIISGGVCGGGNSSYCFASSSQPQPNKSEGGQE

>Alligator\_HAS1

MSSGVKQAFQFTVSSAKSGSGSCISGGGGGSRMPLMLGRVCVGGIGSSKGFSSRSYGGGACYGGGISSGS FAGGSYGGAGSIGGGHLNIGFSGGSTCIGGGIGGGIGGGIGGGIVGGSIPDCGF'DGGIVCGGPF'GGGFG GSAVGGGFGGSAVGGGFGGAVGGGFGGGSGGGFSGDGLLFCCEKITMQLNDRLASYLKVRRCLEEE NAELECRIREWYAKHGPTCEPKDYSCYLREIEDLQNIIVCATIENNKIVLNI DNSRMAADDFRVKYETEL SLLQSV EADINGLRQVLDQLTLCRSDLEAQLEALKEELCCLKKNHEEEMNCLRQSTGDVSVVEVNTCPGP DLKQVLDQMRQYEAIIAQNRKEVEDWYACKIEEVNREVISSGQIECSNSQVCELRRQLQALEIDLQQAQ IRMRDNLQSSLAETECRYNNQLAELQNIICVEQQLAELRAEIECQNOEYKVLVDVKCRLEQIEIHTYCCLEGGHREFSSKGVISSGGISSGGISSGISHSSGIGGGGICKSSGGIIGGGGIVKTIHTHSSSSHCLPSPCP PGDIKVP'CRRLHD

>Alligator\_HAS2

MSCGIKRTVTTVSSSNAKSGSGSYVGGGGGGARTSSVCSGKSISSGGMSSRGRFSARSFGGGRCYGGGLST GSLAGGSYGGAVGLCNMGNIGFSSGSTCVGGGFGGGGFGVGGSGFVGGIGGPIDCGFGGGFGGGGFGGG IVPKGGSGGDGLLFCCEKITMQLNDRLASYLKVRRCLEEEENAELECRIRDWYAKHGPTCEPKDYSCYI REIEDLQNIIVCATVDNNKIILIDNTRMTGDDFRMKYETELALCQSV EADINGLRQVLDQLTLCRSDLE AQLEALKEELCCLKKNHEEEMNCLRQSTGDVSVVEVNSCPGPDQLKQILDDMRQYEAIIAQNRKEVEDWY ACKIEEVNQEVISSSKEIECSNSQVSELRRLEQALEIDLDSQLRMRDNLQSSLAETERRYNQLAELQNI ICVEQQLAELRAEIECQNOEYKVLVDVKCRLEQIEIQTCCLEGGQRELIHQHGIISSGIIHSSGGGGG ICKTSGGIIGGGGGIVKTCHTYTSSTCPPVDIQGPCRRVCD

>Alligator\_K14L1

MTTSVRQYSSSTSLKGGFGSGSSRGSVRLSGGAYRAPTIHGGSGGYSSVSSRMIISGVGGMGGGYGG SYCSSVGGGFGGGGFGGGGFGGGGFGGGGFGGGGFGGGGFGGGGFGGGGFGGGGFGGGGFGGGGFGGGG TMQNLNDRLAAYLDKVRLEAANSELEIKIRDWYKQKQPGPDRDYSPIYRTIEDLRNKIILAATVDNANLI

LQIDNARLAADDFRTKFETE QALRMSVEADINGLRRVLDLTLARADLEMQIENLKEELAYLKKNHHEEM  
NALRQVVGGEITVEMDAAPGVDLTKILTEMREQYEHLDKNRREAEQWFFKQTEELNQEVAINTEQLQSS  
KSEITELRRTIQGLEIELQSQLSTKAALEGLTADTEARYGSQLAQIQGLITSVEEQLAELRCMDMERQNH  
YKILLDVKCRLEQEIATYRRLLEGEDAHVPALYSSGLSSHSGRDVSSSTRQVRTIVEEVQDGKVVSSREQV  
HQTR

>Alligator\_K14L2

MTTSVRQYSSSTSLKGLGGFGGSSSRGSSVRLSGGAYRAPTIHGGSGGYVSSSRMVSGFGGGLGGGYGG  
SYCSSVGGGFGGNGFGGSGFSGGSGGGGFGGGLGGGFGGSGGGFGGGLGFGGPFGGGDGILPAGEKETM  
QNLNDRLAAYLDKVRALAEANSELEIKIRDWYKQGGPDRDYSFYRTIEDLRNKILSATVDNANLLQ  
IDNARLTADDFRTKFETE QALRMSVEADINGLRRVLDLTLAKADLEMQLENLSEELAYLKKNHHEEMNA  
LRSQVVGGEITVEMDAAPGVDLTKVLAEMREQYEHLDKNRREAEQWFFKQTEELNKEVAINTEQLQSGKS  
EIMELRRTIQGLEIDLQSQLSMKAALEGLTADTEARYGSQLAQIQGLITSVEEQLAELRCMDMERQNH  
YKILLDVKCRLEQEIATYRRLLEGEDVHMSQSYSTQFIKEGPKTTRQVRTIVEEVQDGKVISSREQVHLSR

>Alligator\_K117

MASSLSRNLFCFVGPQPRNLNWI SAAGLQPGLLSIHGGAGSIGSYLSSASDAFVKCVPGGSYEPGIGSGA  
SGIGLLMNEKDTMQNLNDRLAAYLERVCSLEEANGQLEQRIQELQVKKTLARHYDPSSCFSTIAELRSQ  
IQDESVRNSQLTLQLDNAKLAANDFRMKYEAELATRLGVESDIKGLRKVLDTGLTEARASLQVQIESLKEE  
LTYLQONHGEVVAALQGHGGSVSEVDASPGINLVKTLAEIRDQYEDIIEKNQREAEAWHKQCCETFTQ  
EVATSSALQAARTKATELKRIVQSLEIEFQMLQSTKEALEGLTAEESHYGVEMAQLQNLVAGKEAELA  
QLRTDTQRQANEYQHLLDLKTRLEVEIATYQHLLLEGQEVSEAKSPKQELPEAVSKAPTTRIKTLIEE  
LVDGEVSSCIEVEHPL

>Alligator\_K18

MSISRSVYSSSTRPVSSSQGFTTRKTTAASVYAGAGGSGSRI SMPWGSRGVYGANSIYLGASGGSGGGY  
GASGIYLGGS AVIHNEKMTQDLNDRLASYLEKVRSLTANHNLEVQIREFLDKKGPSTQDWTHYWDIE  
DLR NKIYEESVDNARIVLQIDNARLAADD FRV KYEGELAIRQSV EADIAGLRKVIDDTNMSRLQLESEIE  
NLKEELIYMKNHHEEAKSLQAQVSGSGLTVEVDSPKTHDLGKIMTDIRAQYEAALQKNREDLDKYWNQQ  
ITESTIETQSTKMDTAHGTLELRRTYQTLEIELESRLNLKGSLEANLMEVENRYGMQLEHLNGLLLR  
TEAELMQVRETEVQRQAEYQALNLIKVKLEAEIATYRRLLEGGEEFSLKDALAEDSSHKVYIQTSKQIVD  
GKLVSETTETRALK

>Turtle\_K24

MSLRIASGSRKVSFFGGGGSVRSRIGGSFVSGVCLAGGSGVGLGSGLGGGAGGSFGGGFSGGFVGNV  
SVGGGYGDYCRSSFFGGLGSGYGGGFSGADGSLLSGGEKGTMQNLNDRLAKYLDKVRALAEANADLEHKI  
RQWYEKHDPAAAGLRYDYSKYQIIEIDLKNIISATIDNAKLVLDLQIDNAKLAVDDFRKLYENELFLHQS  
I EADINGLRRVLDLTMTRSNLEAQLSLELTELVLKKNHEGEMKSFQHGSTGEVNVEINATPGVDLTKLL  
NEMRAQYEYLAEQNRREAEQFNKMSQQQLQQI SDDAGAADSARHEIETIKRTLQTLDIELQSLAKKCS  
LEGLTAEIEGNYGQLSQIQQLISNLEQLKQIRSEMECQNAEYEQLLGIKTRLEMEIETYRRLNNGEGG  
GFRSGGYEYQESRVQIKEPDKTRVVKTI VEELVDGKIISSKVQSV EERPTK

>Turtle\_K12

MALSVRTGGGSRQFSSRSGLSGGSVRISSSSGAGGFGGSGGGGFGVASLLGSSSGFGGFGSSSLGGGLG  
GSFSGSSVGGFSGSFGGGLGGGFGSGSAGFGGGLGGGFGSSSAGAGGGGFGAGGGGDGGLSGTEKETM  
QNLNDRLAAYLNKLVHSLGEGNTDLEHKIREWYKNGPGAGGPGAGHDYSKYPIIEIDLNKIINASIDNA  
RIVLQIDNARLAADD FRKLYENEAALRQSV EADINGLRRVLDLTLTRADLEMQIESLNEELAYLKKNH  
EELQGFQGNATGQVSVEMDAAPGIDLTKLLNDRMRGQYEVIAEQNRKEAEAWFNEKSMELKREISTNTEQL  
QSGKSEITDLRILQGLEIELQSQLAMKKSLEDTLAETEASCAQLSQIQQLIGNLESQFQVRADMERQ  
NAEYQQLLDIKTRLEMEIETYRRLLDGFEFGNGFAGGQGGSFESSLTVSKSQTSQSLDSSNDPTKTRKIKT  
IVEEVVDGKVVSSHVKEIEBK

>Turtle\_K20

MAFQSRNLYLTGTSSIFQPVAPSLSGSTYRKTAIRKYQAPSVYGGAGGYTRISTSTNYGGGFGGFGSGF  
QLNTSGSDILLAGNEKLTMQNLNDRLASYLEKVHFLEKANSQLEKQIREWYANSSSTRHDHSPYFKTIE  
DLQNKIGAAHLENARLLQIDNAKLAADD FRMKYENELAIKQNVENDLAGLLRVLDDTLTRSDLALQIE  
GLNEELTFLKKNHHEEVGELRKLQGGTVNVEVDAAPSIDLAKIMENMRQYDSMAEKNRQEAADRFDKQT  
EEVNQEVAINIEQLQTKTEITDLRRTFQGLEIELQSQLSTKKALEDTLAEMEARYGSQLAQIQAAIGNV  
EAQLMQLRADMQSQSTEYSTLLDIKTRLEMEIATYRRLLEGEDSSRHQFTEISTIEEPEREINKIRKIKT  
VVEEVIDGKVVSSSETKEIEEK

>Turtle\_K23

MNSNQGRFQFSSGSHRSAGCDLALRGSSYRPSAHGGAIGTSVSISSSTRPLWLASGVVSWGAFGTSHG  
DSIFLGGNEKQTMQNLNDRLAAYLEKVRSLAANAQLESCILEWHKRSHEKHHDFNQYEQNITDMQGGI  
EDGKITNASIFLHIDNAKIASEDLSLKYEVEQSLRQGMQISVENLRKELDNLTIVTTDLEMEIEGIEQEEQ  
ILRKKDHKEMGHEHSSQDFKVNQVNAVPKEDLAKILAGIRKDYEAIEKNHQGLEVVYKEQTATVSPA  
TNI SPEEIQSNESEIKNLRRTFQALEIELQAQFSKKYALKGTLAETQAHYTFQLQNIQQSISNCEEELSQ  
LRQDIKQNNHYKILLGKTRLEKEISTYRQLLEGTADGITKTFESSSTKEHAGMTSQKLTVTQDSVNGQ  
VVSSTTNEIDQQM

>Turtle\_K15

MATSFMQSSSSNYGGGLGIGGGSSRVSSVRMGGSYRAPS IHGGSGGRGVSVSSARYVSSGGGYGGGLGS  
SYGAGYSGGLGGYGGSSGFYSFGG DAGGCFGGGAGGGFGGGAGGGFGGVDYFGGGLGGGDGGLSGNE  
KVMTQNLNDRLASYLKVRALAEQANTDLEIKIRDWYKQGGPSPDRDYSFYRTIEDLRNKILSATVDNANLLQ  
RVLIEDNARLAADD FRKLYENELFLRQSV EADINGLRRVLDLTLRADLEMQIENLKEELAFKKNH  
EEMKEYSNQMGKVSVEMDAAPGVDLTSILSEMREQYELADKNRREAEAWFYKQTEELNREAVATSTEQI  
HTSKSEITELRRTIQGLEIELQSQLSMKAGLEANLAETEGRYCAQLAQIQAITSIEEQLAELRCMDMERQ  
NQEYRMLLDIKTRLEQEIATYRRLLEGGQDSQSGWSPKASLSSISSSSSGKVRISVEDSVGDKVISTHE

RKY

>Turtle\_K19

MSTYSSKQITSSGLGNISGSSLSRAVGSFRAPSIHGGSGGRGISVSTARFVSSVGGVGGGLGGYGGGLYGG  
FGGGFGGGDGLLSGNEKSTMQNLNDRLASYLKVRALEEANSLEVKIRDWYQKQPGPAHDYSLYKTI  
EDLRDKILAATIDNSKIVLQIDNARLAADDFKTKYETEALRMSVEADISGLRRVMDLTLARTDLEMQI  
ESLKEELAYLKKNHHEEMKALGGQTVGQVSEVDSAPGIDLTILADMRDQYEVMAEKNRKAETWFNSK  
TEELNQEVAINTEQLQTSKTEITDLRRTLQGLEIELOSLSMKAALEGLTADTENRYGAQLAQIQLHIGN  
VEAQLTDLRADMERQNSDYKQLMDIKTRLEQEIATYRQLLEGQDS

>Turtle\_K9L

MSRSTKTTITSSSVVGGGGGRISSSGGGGGRSSSSGGGGHSSSSSTRITSGGSFSGRSYGGGGSRCDY  
GRISCGYGGGIGSGSCGVVIGGGSYGGGIGSGSFGGGFGSSCGFGGGFDGGFGGGFGGGFGVGGVGG  
AGGFGGDDTGILSSNEKITMQNLNDRLASYLKVRALEEENANLENLIKWEYLKRGPIATLKDYSRYEE  
IEQLNNQIVNSVSEVNVKILNIDNTRMTIEDFKLKYETELGLRQNVEDINGLRPLLDQLTLTRSDLELE  
FESLKEELISLKNHHEELKGLQPQTSQDVNVVNATPGYDLTEILNDRREYEHIEENNRKEVEKWEYET  
KISEVNHEVHSSGRDIESSTKQVTELREYQNVIEIELOSLSTIQSLQSSADTEGRYNIQLNQIQTII  
SVEEELASIRCEIDNQNEQYRLLGKIQNLEQEIATYRHLLEDEGNQEIISTREGGGYSSGGGRVIGGGGS  
GVRTGSSITYGGSIGVVRGSSITGGGSGDRGTGSSITYTGTGSRGSRGSSITGGGSGGRTEIREGN  
VHYGGGTVRGGEICSGDGTGGRTCGVTGGERISGSSSSSHSYSSSHGHSSSQPSKSGEYIYHSRKSFD

>Turtle\_HAS1

MAGPQTVTLSTKGRSSGSCAVGGGGGRISVSSGRYSSCGIGSGRFGSRSYSGGASCGAGLSAGSFS  
GGSYGGVLAGGHPGYGYGGCSSIGFSGGSTRCGYGGGFGGAVGGGFGGAVGGGFGGGGLCGDGVFVTCDE  
KLTMQNLNDRLASYLKVRCLEEENAECKIKWEYAHHGHTGVPKDYSCYYKEIEDLQNVICATLDNN  
KIILNIDNSRMAADDFRLLKFETELALRQSVSEADINGLRHVLDLTLCRSDLEAQLLECKEELCCLKKNHE  
EINCLNRNQSTGDSVSEVNSCPGPDLLKILEEMRCQYETMIAQNRKEVEDWYECKIEEVNREVITSSQEV  
ESCNNQVAELRRQLQCLEIDLQSHLSQRDNLEASLAETESRYNSHLCQLQQQITCVEQQADLDRTEIESQ  
NHEYKVLDDVKCRLEQEIHTYRCLLEGGQRDIVGSEGGFVAGGIGGGTVIKTSHCYSSSHSVPHVTSCH  
PGDLKGHRKICD

>Turtle\_HAS2

XXXKDYSCYYKEIEDLQNVICATLDNNKIILNIDNSRMAADDFRLLKFETELALRQSVSEADINGLRQVLD  
ELTLCRSDLEAQLLECKEELCCLKKNHEEENINCLNRNQSTGDSVSEVNSCPGPDLLKILEEMRCQYETMIA  
QNRKEVEDWYECKIEEVNREVITSSQEVESCSQVAELRRQLQCLEIDLQSHLSQRDNLEASLAETESRY  
NSHLCQLQQQITCVEQQADLDRTEIESQNHHEYKVLDDVKCRLEQEIHTYRCLLEGGQRDIVGSEGGFVAGGIGGGTVIKTSHCYSSSHSVPHVTSCH

>Turtle\_K14L1

MTTSVRQYSSSTSLKGLGGLGGGGSTRVSSVHLGGPYRAPS IHGGSGGFSVSSSRVYVSGVSSLGGGY  
GGSYNSFSGGGYGGGLGGGYGGGLGGGYGGGLGGGFGGGYGGGFGGGGFGGGDGIIPAGEKETMQNL  
NDRLATYLDKVRALEEANSLEIKIKWEYKQKQSPDRDYSPYRTIEDLRSKILAATIDNANIVLQIDN  
ARLAADDFRLLKFETELALRMSVEADINGLRVLDLTLARADLEMQIENLKEELAYLKKNHHEEMNILRS  
QLGGEITVEMDAAAPGVDLTKILADMREQYESLAEKNRKEAEQWFFTKTEELNREVAMNTEQLQSGKSEIT  
ELRRFTVQGLEIELOSLSMKAALEGLTAEETESRYGAQLAQQLGLITSVEEQLAELRCDMERQNHAYKILV  
DVKTRLEQEIATYRRLLEGEDTHIASQYSAALSQSGRDVISSTRQVRTIVEEVQDGKVVSSREQVQLST  
R

>Turtle\_K14L2

MTTSVRQYSSSTSLKGLGGLGGGGSTRVSSVHLGGPYRAPS IHGGSGGFSVSSSKYVSGVSSLGGGY  
GGSYSSSFGGGYGGGLGGGYGGGLGGGFGGGYGGGFGGGGFGGGDGIIPAGEKETMQNLNDRLANYL  
DKVRALEEANSLEIKIKWEYKQKQSPDRDYSPYRTIEDLRSKILAATVDNASLLLQIDNARLTADDF  
RTKFTEALRMSVEADINGLRVLDLTLARADLEMQIENLKEELAYLKKNHHEEMNILRSQGGDITV  
EMDAAAPGVDLTKILADMREQYESLAEKNRKEAEQWFFTQTEQLNREVAMNTEQLQSGKSEITELRRFTVQ  
GLEIELOSLSMKAALEGLTAEETARYGSQLAQLQGLITSVEEQLAELRCDMERQNHAYKILV  
DVKTRLEQEIATYRRLLEGEDTHIASQYSAAKEVSTTRQVRTIVEEVQDGKVISSREQVHHSR

>Turtle\_K117

MASFSSGVTLGPRLSWSVRVVLQGGVPGGLGVCAGGAGSTSSRLFSGSDGIVGPGGGAREPGLLSMNE  
KDTMQNLNDRLAAYLETVRSLEEANGQLERQIREVYAKRAQAGCQDLSCYFSTIAELRSQIQAASTNAQ  
LILQIDNATLAADDFRLLKFESLAIIRRGESDVAGLRKVLDEVTLNDRASLQEEELGSLQEEELAQKQNHGE  
EAAALQGRGGVSVSEVDSAPGVDLTKLAEIRDQYEDVIERNHREAAAWHKEQCETVAQEVATSAEAVQ  
GARTKTELRRVVQGLELQSLYSMEALEGLTAEETRAGSGAELEQLRECVARKEAELAQLRTDTQRQA  
EEHQQLDLKTRLEMEIATYRRLLEGGDVRSDAKSPVRQTPPEAVNNSPTSRVKTVEELLDGRVSSR  
TEEVEHPL

>Turtle\_K18

MNYSRSTTYSSGVRPNIMGRRYAPNSAASVYAGAGGSGSRI SVARTTSLGSSFPSSAGGSYSIALSGS  
GVVQNEKETMQDLNERLASYLKVRRLRLETDNQKLETQIREFMDKKGPSRDRWSHYFDIEDLRKQILDSA  
VDNARIVLQIDNARLAADDFRLLKFESLAIIRRSVESDINGLRKVLDDTNMSRLQLEGEIESLKEELIFMK  
KNHQDEVDSLQAITNSGLTVEVDAAQPDLDGKVMAEIRAQYDNLAQKNMADLDQOWNQMITQSTVEITQ  
NTKEIEVARSSVSELRRYQTLIELESRLNKLKASLEANLQDVEQRYAMQMEHLNGQLLRAEAEQAQIRN  
DIQRQSEDYQALLNIKDKLEAEIATYRRLLEGGEEFNLDALVDGTGSIQSTTHKVVTTTKMVDGKVVSD  
TSESQLFRR

>Lizard\_K24

MSLRISTASRRISPIAGNGGIIKLLGSGSGMHGYSGLAALGSGCGGSGVCGGFGGAGFGSGGGYGGV  
SFSSRSGSGFGGGSGFGGGSGFGGGSGFGGEGAGFGSASMSANYGGNYRPPSAMVSSSGFTGDSIFLAGA  
EKETMQNLNDRLANYLEKVRSLAEANAELEVKIRHWYKNGPGAPGVVRDYTKYHQIIEDLRNVVNTTI

DNANVVLQIDNARLAADDFRLKFENELFLRQSVESDINGLRRVLDLTMNRSDLEAQLNLEELAYLKK  
NHEEENMLKSNSTGDVTVMENAAPGIDTLTKLLNDMRAQYEDLAEQNRREAEQFHKMSQPLQQQIYDDA  
GAVSSARNELIELKRFSQSLEIELQSLAKKASLEGTLTETEANYSSQLHQQLQVSNLEEQQQIRSET  
ECQNSEYQQLLGIKTRLEMEIETYRRLDGENFHYSYDTKVHMRPESKTRVVKTIVEEVVDGKVVSSQVKS  
VEERATK

>Lizard\_K24L

MSLSLLTSGSSRQLSSYSVGGGGGGSVRLSSGGGFGSGSKFVGGYSGGGYAGGSLAGGYGSLGGGGSGG  
FGGGGFSSSSFAGGFGGGGGGGGGGGGGGGGGGGGGGGGGGGGGGGGGGGGGGGGGGGGGGGGGGGG  
NDRLANYLKGKVALEEANAELKIKDWYAKCIPDTSRDYTKYFNI IEDLRGKILRQTIENAGIVLQID  
NARLAADDFKLKYENELFLHQVNDINGLRRVLDLTMHRSDELQIEGLNEELAYLKKNHEEELKSF  
GASSGDVSVEMDAAPGVDLTKLLNSMRSQYEELAEKNRQEAEDQFNKQVQALRQEISANVDQLSTGKTEI  
TDLRRTLQGLELELQALQAMQSQLEGLTAEETERNYCDQLAQIQSQIAGLEEQLLQLRADMENQNSDYQHL  
LGIKTRLEQEIETYRRLDGGGGGFGSGVSYGSTSYGSTSYGSTSGSGSGTESKTRKIKTVVEEIVDGRV  
VSSQVKSVEEKQAT

>Lizard\_K10L

MQLRKDVPKKEHTLTKSAYKSLRSLFLFKISLGGCTFSFSCETHNFFLHFNIMSYFGRGSRQVSSSHSGGTS  
AKLSGCCAYGLGGSSAGSLCSRTTWSTGSGWGGGGGGGGGGGGGGGGGGGGGGGGGGGGGGGGGGGGGG  
NDRLASYLAKVHALEKANSELELKIKNWYEKNAFQADGGFRDYKYYASIDELRNKIVSASVNNNSNIILQ  
IDNARLAADDFRMKYENELVFFRQSIEADINGLHKVFDEVI LSKSNLELQIESLIEELAFLLKKNHDEEIRG  
LRGPTSGNVSVEMNAVPGPDLTILLNKMREEYEALAEQNRQDAETWFVKKSNELNNTTISMSAKETSTNKK  
EIAELRRTLQGLELIDLKTLALRQSLQSLTETLAEETEDGYCSQLLQMQGLINNTAQVKQVRDDMESQADYR  
QLLDIKIHLENEIETYRHLIDSEKSEFVYRDTKTLESGLDLKLRGTEYTRGLSGSRDISSSGTEAIDTN  
SESKEKETKRTTVIKTIIIEELDEHGRVTSKVVQSVVEEKTVI

>Lizard\_K12

MSLSVRAATGPLQFSSRSYGGGGSVRLSSTSSAGSFGGGGGGGPLLNFGGGGGYGGGLGAGYGGGLGAGY  
GGGGGGYGGGGFGGGSGAGFGGGYGGGGGGESSLLSGTEKETMQNLNDRLAAYLDRVHSLLEEANTELEERK  
IREWYEKNGPGTGALGAGRDYSKYYPVIEDLRNKI INATIENARIVLQIDNARLAADDFRLKFENEVALR  
QSVADINGLRRVLDLTLTRADLEMQIETLNEELAYLKKNHEEELIGFQSNATGQVSVEMDAAPGVDL  
KLLNEMRAQYESIAEQHRKEAEAWFNEKSGELKREISTHSEQLYGKSELTDLKRTLQSLIEIELQSLAL  
KKSLEDTLAEETEAGYCTQLAQMLQIQIGNVESQLFQVRADMERQNAEYQNLMDIKTRLEMEIETYRRLD  
EIGSFESASVTSAKSVDSRDPNKTRKIKTIVEEVVDGKVVSSKVKVEEIKI

>Lizard\_K23

MSSSQGLYHFPAGSFRGAATVLCGSFAPAEGYRASSLHGSSSTRIPMSFGRPIWLTSDGGAGWGGFG  
GSHGNLFMGRNEKQTMQDLNDRLAAYLQVHSLLEEANTQLEGCIREWHERRSQGMKHDFTDYEQNIIVDMH  
ERIEAGRVTNAGIVLQIDNAKMATEDFRLKYESEKALRQVDDVENIRKELDNMTIIITDLEMEIEALR  
EDHILKKKEHEKDMESAGAFKDVNVNVKVNTPAQEDLAKILAGIRADYEAI IQKNHQSLDAWFQKQIAND  
SSEKPNQEEQQSNQKEISELNRTLQSLIEDLQTHLNKCSLENNLDETRAYYAFQLQSIQNLI SQCEEE  
LSEFRHDIKCNQNYKVLGKIKTRLETEISTYRQLLDGKGMAGSSSTLKEIGSNQNLKKIVQESVNGQV  
VSTHTTDIKRQV

>Lizard\_K36L1

MAAPSTHTCGSLKGPCRVSTVSRPNSAASATCRPGNIFPRRSSICLPSLGQPTPSLPNSCRSGGFMPSTC  
LPPPSTGSTCVPPPCLPSARPLQCFPRGPEEGILNCKNEKTEMLFNRLGNVLERVRCLEQENAELEAK  
IREWYEHENAYVCTDFKPFYCTIDELQQQICCTKADNAKLCLDIDNLKMASDDYCTKYDYELSLRQDEC  
DSSGLRKVLDNLTLCRADLEAQLESLEEMMCLKKNHEEESALRSQLDGRINVEVDAAPSCNLNKVLDE  
MRCQYEAADLEKNRREVEDWYCAQMEELNKEVISSGEQLQCCQTEI IETRRCVQTLIEELQAQQSMKSALE  
TTLQETESRYCTQLAQQLCLISNVEAQLTEIRSDIERQNCDYKALLDEKARLDCEIAAYRNMLEGEDCKI  
PNRCPDEGSTTVRSTVCRQVCKPEPICPPDCKPPGPMVGPKLTSPCANPSGPVFATCGPPPCAPP  
PCGPRGPCGRSPVCPQPCGPPGPRINTKICRM

>Lizard\_K36L2

MASKYYAQTIVSSGKVGGLTRIASVHSGGSCRVPSLAFGSRVSSSSIKLGCNYMPSICPPNASFAPF  
LSGNNGWHDGILNCKNEKELMQCLNDRILANYLERVRCLEQDNANLECKIREWHCQAPYESTDFHSHYKI  
IEELQHQILCAKTENARLVLEIDNARLAADDFRTKYETELALRQCVESDIHGLRKLIDEMTLCRADLEAQ  
LESHKEELLCLKKNHEEENALRSKLGARVNVVEVDAAPSCDLNKMMLGEIRNQYECLEAKNRDRDVEWTFSS  
KMEELNQVLSDEELQNCQSEI IELRHTMQALEIDLDAQNMKNLECTLHETEARYSTQLAQQLQCMIS  
TIEGQLGDLRNDMERQSHEYKILLDVKTRLEAISTYRRLLEGEDHKFPRVPSVPECPPVPSAPAPHITK  
KIRTITEEIKDGKVISSREQVQHVAL

>Lizard\_K15

MSTYYQSSSSSHGGMGFGGGGGSSRLSSGGFGGSGGGRMSSSVRYVSSGGGGGGYGGSLGGGYGSGF  
ISGGGVGLASGFGGGAGGGYGGGAGGGYGGGGGGGGGGGGGGGGGGGGGGGGGGGGGGGGGGGGGGGG  
LNDRLATYLDKVRALAEANTELEVKIRDWHQKQAPKPSRDYSQYKI IEDLRDKILGTTIDNSRVILEI  
DNARLAADDFRLKYENELHRSQVSEADINGLRRVLDLTMKSDELQIEGLNEELAYLKKNHEEELMKEF  
STQLTGKVSVEMDAAPGIDLTKI LADMREQYEHAEQNRKDAETWFFSKTEELNREVATNTEQIQTSKSE  
ISELRRTLQGLELELQSLQSMKAGLESNLAETEGRYCAQLAQIQNLITGVVEEQALAEARNDMERQNOEYKM  
LMDIKTRLEQEIATYRNLLLEGQDSKLSLWSPKDAYGGGTTVYSSGGSSGGGGGGAGSGSYGGGSGSIT  
TSSSTSSGSKVRSNY

>Lizard\_K19

MTSYSYRQSTSVGGGLGGHSSFRAPSIHGGSGGRGISVSSARFVSSGAGGALGGGYGGGMSGGNYGAGF  
GSGFGGGFGGGGGGGGGGGGAAACGAGNDGLLSGNEKITMQNLNDRILASYLDKVALEESNADLEVKI  
REWYQKQGPSPARDYSHYYKTIEDLRDKILDATIDNNKIVLQIDNARLAADDFKTKFESEQALRMSVEG  
DINGLRRVLDLTLARSDELQIETLKEELAYLKKNHEEELGALSGLGGQVSVVEVDSAPGIDLTKILAE

MRDQYELLADKNRRDAEAWFTTKTEELSREAVANTEQLQSSKTEITDLRRTLQGLEIELQSQLSMKAAL  
GTLADTENRYSAQLCQIQLNISNEAQLVEVRSDMERQNSDYKMLMDIKSRLEQEIQTYSRQLLDGHDHLF  
SGADSGIIDKSGDGKKH

>Lizard\_K9L1

MSVKGGSSGGGAGSSYSGGGSSHTASGGSSRRISSTGISSGGISGGGTSGGGISSGGISSGGLSSGGVS  
GGGSSSSGGVTRITSSSSSRGYSGRSYGGGSSRSGGFSGSSAGRISRGRVYGGSSYGGGSSYGGG  
YGGGGYGGVSYSGGGYSSGFSGSSYGGGGYGGGYPFRRGSFGMGGDGGLSNNKSTMQNLNDRLA  
AYMNKVKYLEDENAQLEVLIREWYQKHGDVGTVRDYTHHYQEIDQLFNELVNETDDYNKILLNIDNTRMT  
AEDFQIKYQTEAGLRQNVADINGLRPLMDQLTLARSDELAQFESAKEELITLKNHQEALRELQSQRGH  
GDINVEVNAAPGPDVKRQLDQLRAEYEAIDNNRREVEQWFESKMEEVRRQQVSSGLEISSGNQVTDLR  
RQYQTLIELQSALSMIQSLQSNLEDTERRYNLQLOQIQSMIQPVEGELASLRGEIESQSQEYQSLGKIK  
TRLEQEAQYRQLLDEGQQEIGSGGGGGYGGGYSGGGRRGSIGRIGGGMSSGGMSGGMSGGMS  
GTISGGMSSGMSGGMSSSGISGGGISGGMSGGGLSSGMSGGGMSGGSSISSGKMSGMSSSGMS  
GVIGGSSIGSGGGSSQIGGGSSSRHGRKSF

>Lizard\_K9L2

MSSGYNFRQSSSSGGGSCVCGGGSSGGGSSGSHSGSGGGGSSGSSIRHTSTGRNSQGFSGES  
HDAGRSRRRSGAGIGHASAGGFGGSSVHSGGLGGSSVHSGGFGGSSVHGALGSGSVHSGGFGGSSVHSG  
GLGGDSVHSGGFGGSSFGGSGVGRGSGYGGGSMRRGFSFGGFGSSGFGGGYGGGSGGGGFGPAGGFGGSS  
LGGGFGGAGFGGDDTGFLSNNEKSTMQNLNDRFASYLNKVKSLAENNQLETLIREWYQKHGQTEPKDY  
SSYTEIDQLVNELISASLESNKILLVDNARMAAEDFKLKYETEYGLRQNVADLQGLRPLLDKLTMDK  
SDEMGQYESLHEBLVHLKKNHDEVMKSHHSGGDDVNVVNSSPGDLTKTLNDRQYEEIIMKNRKEV  
QQWFQAKMEEARQQSPESQEGGSGRHQITELTREYQTLIELQTLSTIQALQNNLNTEGGYNMQLQ  
LAQIEPVEAELAGIKGEIQNQTEYQTLGKIKTYLEQEIINQYRQLLEEGKQLAANVQGGGSGGTGSYGG  
SSGGRRHSVGGISSGSSGGGSSGGGHSYGGISRGSSGGGSGSGSHSYGGISEGGSSGGGRSTSGGRHS  
TSGISHGGSSIGISGGSSRRGRESGGVGGHSSGRI SPGSSGGGSGGRGQSHSGISHGGSSGGGSSG  
RGGQSHSGISHGSSAGGSSAGRPSSGGVQGGSSGRGSESGRQSPSGHSGGGRGVGGGGHSSGGISH  
GRGSSGGSHHLSSSSSQSRPSLTHSHSSSSSSQSQSGSHGWVHEQADECQAYAQKGMEE

>Lizard\_HAS1

MFTLCLSSKHTYTMMYINGSHSNGATSYNVLGASSGASRRCVFPDVGSSNCGGSPSYCGGTAYEGNQDME  
RGIYGGLDGGPLNGYICTPSSGFGFSNICFKHLGGGFGIWIQAPLCSCKDKMTMQNLNDRLASYLNDNR  
YLEEENAQLECKIRDWDYDQGSNDPKDYNYYEQTEDLKKQLICATVDCRKLILDIHNKLTADDFRMR  
YEAERVFRQDKETDIDSLRQDQLTLGRSDLEAQLESFQEEELCKKNHEEKVLLTKQAQGNLNEVN  
SNPSELQKALDNLRRRYEAIIEKNVKEIETWYESMTEAINMSKELKDDNNQVVDLKGQLQTLLENLQ  
LSLRDTLQDSLAEIQCLYNNSLAEIQNICYMEQQLVLELRVKTECLDQYIRLSDAKCLEHEIETYCL  
LGEEQHD

>Lizard\_HAS2

MSFSSKHTTTMYTKGRSSSGCVTGGSGGRANSGRCSPPARCMSARSYCGGMSYGGSGIDSFFAGGAL  
GGYGGGYSRFGHLGGGFGICNEAPLLSCDEKMTMQNLNDRLASYLKVRCLLEENGQLECKIKEWYD  
RQGPVNESKDYAAYYQIIEDLKNQIVCATVENSCLVLDIDNNRMTADDFRMRKYETELALCQNVADINGL  
RQVLDQLTLCRSDLEAQLESLEELCCLKNHEEESKHLKQSSGDVSVVNTCPGPDLLKQVDELRCQY  
ENMIENNRREVEKWEYSKMEEVNLEVCNNSKEAEDCANNQIVDLKRQLQTLIEDLQAQLSLRDTLQDSLAE  
TECRYNGLHAEIQNQISCVQQLGELRAEMECQNRREYRELLDVKRLEQEIQTYSRCLLEGGQHD  
IATGHS  
SGSSGGGISRQSSGSTRSSPSPSPHPDPSKGHSR

>Lizard\_HAS3

MASYARHIPVNVRRNRVNLGSDGKSRISSAFSTHCTSSGLDRSSFPQSHIVDRSPDFDFANGGQTFSSR  
SCSSVLMSSGGYGRMSTGSCINLNGSHGGYPLLGYGDQVFTGGLGGVPTCGIIFSSSTDEKVLMLQNLNDR  
LGNVIDKVRLEKNAEALSQISDFCLKHGLTGEMKDHSHFYQIIEELKKQVFNLENLNNKILLKIDNNH  
MDLEDLRRKKYETEYVIRENVEADVNGLRPVLKELTGYKADLKAELNLSLKEICDLKKTHEKDLNCRKKRS  
HGSNKEVSI GPGTDLKQMLKEMRQKYEAKIESNRKEVQRYEDKLKEMNLNVNNSQDIEDGNHVKVLDL  
CKLPALEIDLQAQYNMRDTLKVCLAEIECHFQTLGEMQEIQINMHEHQIAELHLEMETDQDEYKGLVDVK  
KRLEQEIQTYSLLKEGQNDPSTIDMQPERSPLA

>Lizard\_HAS4

MSSGTRHTVATPARSSSSSTLGGGRAGVGSVSSGRYAASGISNGRSNFVRSNTGAVSPCTHGPGRGHF  
SSGSCSMFVAGGHVAASGYGDGSHVTNPAARNTVVGAGAGHPTVVGGTGHAI PGDMAAGAHVGMPTGV  
VGGMVMGAHGGMPAGVVGSMGVSAGSPHPSMVAGSPHPSMVGGNPHPGMVAGNPHPGMVAGHCGMVGGLP  
AGMVAGMGGMMGGGHHGMMGVTVMGPI LVS AVGGEPIACASVFSF DGKMTMQNLNDRLASYLKVR  
CLEENADLESRIREFYAKQGPLSEPKDYSHYHQIIEDLKNQLICTSVENKLLLCIDNSKLTADDFRTK  
FETECCLRQNVADINGLHQIILDQLTACRADLDVQCDNLQDELNKKNHAEVACLKQSTGDVNVV  
TCPGPDLLKILEEMRCKYETMIEGRNKEVEAWYESKIEEVNRDVCNNSQEIIEESNNKVTERRQLQALQI  
DYEAQCSLRDTLEASLGTELRYNHGLDQLERISCLEQQLAELRSEMECQNHETELLDVKSRLQEI  
TYRGLLEGGQNDNSNHGGGNTSRVSSASNGRSESRSSTHTYGTSAVHTHHGGHLHH

>Lizard\_K14L1

MSTSFQYTSSSSVKGGSSGGSSRLSHLGRGYVAPGIHSGGLGISVSSSRYSVSGVGSALGGGYSY  
SSYGGGFGGFGGFGGSSVAVGGDVLLAGGKETMQNLNDRLASYLKVRLEEANTDLEVKIKEWYK  
KQGPSPERDYSYFRTIEELRSKILAAATVDNASIVLQIDNARLAADDFRNKFETEHALRVNVEADINGL  
RVLDELTLARADLEMQIENFKEELVYLRKNHEEEMSI FRSQSGGEISVEMDAAPGVDLTKILSEMREQYE  
SLAEKNRDAEQWFFSKTEELTREVAINTEQLQSGKTEITELRRTYQNLIELNAQLSMKAALSSSLADT  
EARYGAQLSQIQLVITNVEQLADLRCEMERQNHAYKMLLDVKTRELEQEIATYRRLLEGEAAHSSQYNA  
AISGREVSKTSRQVRMIVEEVENGKVVSSREQLQSSAY

>Lizard\_K14L2

MTTTYRQYTSSSSAKGSSFGGSSRPSSVHVGGGYQPSIIHGGLGGISVSSSRVSVGVSSLGGGYGGS  
SYCSSYGGGFGGGFGGGFVAGGSDVLLAGGKEMQNLNDRLATYLDKVRALAHANTELEVKIRE  
WYQKRGPFPQRYSYFRTIEDLRSKILAASVQNAIILLQLDNKLTADDFRKYETEHALRSTVEADIH  
GLRKVMDLTLTRSDLEMLQENLKEELAYLHKNHEEELKVLRSQMGEITVEMDAAPGVDLTKILAE  
MRE QYEHLEAKNRKDAEQWFFSKTEELNQEVAINTEQLQSGKSEVIELRRTLQGLEIELQTLQSMKS  
SLEGLTAEETESRYGLQNLQALITSVEEQLAELRCDMERQNSEYKILLDVKTRLEQEI STYRRLLEGE  
EAHISSQ YSSGPTTRQVRTIVEEVQDGKVISSREQVHVSGR

>Lizard\_K117

MSTTFSSRSLFSFGSVRPGSTLSIARPQTASNIYGMNSLPPSAKDTMARRYGPETDILDINQKGT  
M QNLNDRLAAYLGRVHSLSEESNAQLEQNIREYYAKRASAGGPDLSGYFNTLSELKAKIEQETLNNAG  
LLRIDNAKLAADDFFVKLESEVAIRLSLEGDVNGLRKVLDDVNASRASLQVQVDNLQEELVYLKRN  
HEEEVASLQGRLLGTVNVVDSMPGVDLQKVLAEIRDQYEDVMEKNRQEAELHKAQCDAINQVAD  
SSEALQAAQLKITELRRLAQALEIELQSLRSTKIALEGLTVEETESRYGMELSRLELISARESEL  
FQLRSEAQRQAEDYKRLMDIKNKLEQEIATYRRLLEGLDTEPPSPPEHTTSRRVKTLIEELVDGQV  
VSSRVEVEQPL

>Lizard\_K18

MSFSRSSTVYTSSSSSRPGVSSASVQLSQGPSSASVYGAGGSGSRISVSRVRLGSSQSFSGGGG  
FGGSGYGGYSGSFLSGSVVHNEKETMQDLNDRLASYLEKVRSLADNRKLEIQIREHLDKKGPSARD  
WSHYFELIEDLRNQIFDQIDNSRIVLQIDNARLAADDFRVKFEAEALAIRQSVENDINGLRRVID  
DTNMMRLQLESEIEALKEELVFMKKNHQDEVNNLQAQIANSGLTVEVDAPKTQDLGKIMAEIRAQ  
YDVLAQKNLEDLDKYWSQQITESTVVI TEHSKIDIEKARANITDLRRSVQTHEIELESARNLRAS  
LEANLHEVEMRYGLQMEHLNGIILRTEADLAQLRNDVQRQAEYQIILNKKLEAEITTYRHLLLEG  
GEBELSLKDALLESTMQTTQKIHSTKIVDGKVVSETSETRVTKK

>Snake\_K24

MSLRMSTASRKISSYEGGAKMSGIGGGSLYFGGGSMAGLSSYGGAMCSGFGGSGFGGGIGFGS  
ASMAGGYGANYRSSSSVMSGAYGAGDSVFLAGAEKETMQLNLSRLANYLEKVRSLSEANAELERK  
IRHWYEKNAPGAPGVTRDYSKYHRIIDELRNQILSMTVENANVVLQIDNARLAADDFRMKFEN  
ELFLRQSVEGDIINGLRRVLDLTMNRSDLEAQLESFTEELAYLKKNHEEEMTLRRSSSTGDTV  
TEMNAAPGIDLTKLLNDMRAQYEDLAEQNRREAEQFIRMSQPLQQQIHDDAGAASSARNELIEL  
KRSLSQLEIELQSLAKKASLEGTLSETEASYSQLSQLQMQVSSLEEQLQQIRAETECQNSEY  
QQLLGIKTRLEMEIETYRRLLDGESIRAAAYETK VQIREPTKTRVVKTI VEELVDGKVISSQV  
KSVEEKTSK

>Snake\_K24L

MALSVLTSGSSRQISSYSIGGGGGSVRLSSGVFSGGSKFAGGYSGGGFGGSLAGGYSGGGLGG  
GSLAGGYGAGMGGGFASSFAGGFGGFGMGGDGGLTGDEKQTMQNLNDRLANYLKGVHAALEEANS  
ELELRIKEWYGKFSATDTRDYSKYFKIIEIDLNRNQCRIENAGIVLQVDNARLAADDFKLKYEN  
ELFLHQSVEN DINGLRRVLDLALNKADLELQVESLTELVLKKNHEEELMSFRGVSAGDVTVE  
MDAAPGVDLTKLLNDMRSQYEELADKNRREAEQFNKQVQALRQQISANVDQLSSGKSEITEL  
RRTMQGLELELQAQMAMKQSLGTLAETERNYCDQLGQIQVQISSFEEQLQIRSDMENQNAEY  
QQLLGIKTRLEKEIETYRRLLDGEGGGYSTTVYSSGPPVKESTKTRMVKTI VEEMVDGRV  
VSSQVKSVEEKPSK

>Snake\_K10L1

MSYFACGSRQTTSSRSSGAPLKLSSCSIYSGGGSSSTRSFSSGVVWVGSGSGWGKTGGSGT  
GSCFHIYNSSSAGGDVLLAGGKEMQNLNDRLASYLAKVHAALEANGDLEQKIRNWIYQKSATH  
INEGLYNDISKYNSIIDLNRNKIITASIRNAGTILQIDNARLAADDFRMKYENELFLHQVNEAD  
INGLKKLLDELMSKSDLEIQIKSLTEELTFLLKKNHEEEMKNWQGTVAGDINVEINAAPGVDLT  
AVLNKMRTEYEALAEQNRKDAETWFI EKSKELNTTINVSARETTTNNKKQIADLRHILQSLE  
IDMKTLQSLRQSLERTLAETEGQYCAQLLKI QGKISSVENQVQQTREDMECQNDYRHLLDI  
KIRLENEIETYRRLIDGASESGRSSKDLGSQLGSEKSGSLRASGSDVRGKTGTETSSRKS  
ETRNIESTTEDKEIKKTRVIKTIIEELDEYGRVTSKVKVSEETQE

>Snake\_K10L2

XXXMQNLNDRLATYLGNVQALEEANSLEGGKIAEWYEMFGAGNAGQQQDYSEYAIIDDLRNQ  
IIATSI DNGLTILQIDNARLAGADFKLYDNEVAIHQSVEMDANGLRKALEEIEITSSDLKVQ  
INSFTEELEQMKNHEEDMVMNSDSTAAGDINVEMNVT PGVDLTTLLNQMRGEYEAALAEQNR  
EDMEAWFHEQSELNRQINTSVEETSTNKSEITEMKRALQGLEIELQSQLSLKQLEATLAETEG  
QYCAQLSQIQEVIGSVQVQVQIRDDMECQNREYQLLDVQIRLENEIDTYRSLDGESEADKT  
SGGRDMRQLSEVKSQSGSRDQSFSSGSKALGSSDSRAKESPSGSGSRSGESADQRFKRQEH  
ATAQSQSKGSGDSRQTDKLGSGNNTRDPQKTRVIRTIVEDRIGDQVVSSRVQSVVEEKHIK

>Snake\_K20

XXXMQNLNDRLAAYLEKVRSLETSNSVFEKQIREWYEKSSPITKQDYSAYFKVIRELQDKI  
TEAREDNTR IILQIDNSKLAADDFRVKYETELGLRLSVEYDITGLQGLIDDLTLVTRDLEQQ  
IESLKEELAYLRKQHDEETARLRGQLSGNVSVVEADAAPGIDLQMMENMRQQYEILAEKNRQ  
EAKDRFDKLEQLNEEVTTTYQLETHRSEITDRRNTLQSLIELRSLQSWKTERENALAEIEA  
HYRTILTQIQMAIGNIEAQLMQLRSDMEQQSMEYSILLDIKVKLEAEI STYRRLLEGE  
DWRMIASDLETSKAEKKNKTLRIKTVVEEMVDGKVVSSHVD EREEKM

>Snake\_K23

MNSSHGFIYHSSGCLGGASGCILOPTGDCYRASSFHGASSLPPMPSFGSPLWLASDAGT  
SWGAFSGSQGNLFMGGNEKRTMQELNDRLASYLEKVRSLSEANTQLEGCIREWQKRSHTQ  
RDFKDYEQNISDMHDRIETGRVNTAGLVLQIDNAKMATDFSLKYEAELRQNVQNDVENIRKEL  
DNMTIIITDLEMEIEALREDHILKKKEHEANMQAHGSSKDFKVNKVDKTPQEDLSKILAGI  
RADYBAIEKNRQSLDSWFQQQIGNESSAGQHNQEELQNSQKIESELNRTLQTLIEDFQTE  
LNKKFALENNFGETKGRYAFQLQSIQNLIKKCEEELSKFRHDIKCQNRYKVLFGIKTRLE  
REI STYRQLLDGDAEGKTSTSLREHRSNQLNKKIVQETVDGGEVVSHTTEIKRQA



>Snake\_K15  
MSTHYIYQSSSSSYGGGGGGSGRVASVRLGPSSIHGGAGGRVSASSARFVSSSGSYGGGGYGYGSLGVGC  
GIGYVAGGGVGYGSCFVGGVGGYGGVGGGGYGGGFGGGYGGGLDFVGGGGGGGLLTGNEKITMQNLN  
DRLANYLDKVRALAEANTELEIKIRDWHQKQAPTSQAKDYSNYKIIISDLRNKIGDCTCDNSKVVLEIDN  
ARLAADDFRLKYENELHLRQGVESDINGLRRVMDLTLFKSDMEMQIEBKEDLAYLKKNHHEELMKEYST  
QLTGQVNVEMDAAPGVDLTKILADMREQYEQMAERNRRDAEAWFFTKTEELNREVATHTEQLOTSKTEIS  
ELRRTIQSLEIELQSHLSMKAGLESNLADTEGRYCAQLAQIQNLITGVVEQLAELRNDMERQONQEYRMLM  
DIKTRLEQEIATYRNLLEGGQSKLPGWSPKDASVGGGTTITYSSGGSSGGGGAISSGGYSSGGSSVTT  
SKVRSNGF

>Snake\_K19  
MNTYSFRQSSSTIGGGVGGSSSFRTPSIHGGSGGYGISVSSARLASPGFVGGGLASGYGGGSFSYSGGCF  
GGAGGAGGAGGAFGGNLNVSEGLLSGNEKVTMQNLNDRLANYLKVRALAEANTELEVKIREWYQKQGP  
ASRDFSLYFKTIEDLREIKDATIGNNSIILQIDNARLAADDFRTKFETEALRISVETDINGLRRVLE  
LTLSTRADLEMIENKEELAYLKKNHHEEMSTLSGQLGGQVSVVEVDSAPGIDLTKILADMRLDQYELLAEK  
NRRDAEAWFTSKTEELNKEAVNTEQLQTSKTEITDLRRTLQSLIEIQSLSMKSALEGTLDADTEARYG  
NRLCQIQGLISNIEAQLVEVRSMDERQNNDYKMLMDIKTRLEQEIETYRQLLDGQDFNFSKAVDGKKP

>Snake\_K9L  
MSCGKTGGRVSGGSIKITSSSSRGLSGKSYGGRSYGGGGFSSGCGRISRGRVSYGGSCYGGGSYG  
GGSYGGYGGSGYGGVYGGGSGYGGGSGYGGGTCYFSSGSGGGGGLSSNEKATMQNLNDRLAN  
YLDQVKRLEDENCQLEIWKIWEYQKHGDIQPKDYSCYQEIIDLQYNELIAETDDYNKIILNIDNTRMTA  
EDFKLYNTEAGLCKNVEADINGLRPLLDQLTLAKSDLEMQFESLREELICLKNHEETLRGLRGQRGHG  
DVSVEVNAAPGQDLKQRLDQLRCEYENIEQNRKEVEVWYETKMEVVRQVSTSDQEIITSSNHQLSELRR  
EYQTLIELQSQISMIQSLQTNLEDTERRYNMQLQIQAMIEPVEGELASIRCEIESQNEQYQLLLGIKT  
RLEQIEICQYRRLLEEGQEQEIGSGGGYGGGRRGGGSISSGGVCGGGVSGGSLGGGGVCGGGVSGGS  
ISGGGLSGGGHIGGSSSRPQSYPTSSHSQACKTGHRKSCD

>Snake\_HAS1  
MSCRSKQTMMYTKGRSSSSSCGGIRVVSIGISGRGPSSVSVVSGGGVSGRTFSSGVSYGGASCTDGGFGGS  
YVYSGGSRFRFGQIGGGFGISNETTLISCDEKMTMQNLNDRLACYLEKVRNLEENADLEARIRQWYDRQ  
GPPSELKDYSSYQOIEELKNQIVCATVDNSKILLDIDNRRMTADDFRLKYETELALCQNV EADINGLRQ  
VLDQLTLCRSDLEAQLSELREELCCIKKNHEEIKSLKSQTCDVSVVEVNSSPGPDLKVVLEEMRCQYET  
MIENNRKEVEQWYERKMEVEVQVCSISKEVEDCNQVVDLKRQLQTLIEDLQAQLCRESLQDSLSETE  
CRYNTHLAEIQNQISLVEQQLAELRAEMECQNRREYRELLDVKCRLEQEIQTYSRSLLEEGQQDISPSSSP  
SGGGLSKHSGGVRVLSHSYSSSSPGQASSSDTKGYSR

>Snake\_HAS2  
MSCGPRHTVLTAGRNSSGSCNLGVGVSSVSGRYTSCGLGNERASFSGRSHLGGRRSHFSTGSCSAGFVGG  
GHAGTNGNFVATSHMGTSAARNMGVGGAGGGHVMVGGIPGGVVGGAHSLVGA VPTAVVNGMGVVGAP  
HATMVGAPCGVVGAVPAGMVGGMGHPGVVGGMGVVPNPGAVAGLIGEPVCGGIFSNLDGKMTMQNLNDR  
LASYLKVRKLEENAELECRIREFYAKQGPLSEPKDYSHYHQIIEIDLKNQLICASVENNKLLCIDNSK  
LTADDFRSKYETECCLRQNV EADINGLRHQLDQLTACRSDLDIQENLQDELCCLRKNHEEEVACLKNQA  
SGDVSVEVNACPGPDLKILEEMRCKYESMIEGNRKEVETWYESKIEEVNRDVTSSQIEESNKNVTEL  
RRQLQALEIEYDAQCSLRDTLEGSLETELRYNSHLAELQERISCLEQQLAELRSEMERCQNHDTYELLDV  
KSRLEKEIATYRGLLEGGQHDIVGGGGVSRNSSTAGARSEARTSHTYVTHSCHGAHLHH

>Snake\_K14L1  
MTTSIKQYTSSSSSKKGASCSFGGGSSRLSSVPLGGGCRSSYGGAGGISVFSRYSYVSGVGNALGGGYG  
SSSYCSSYGGGFGSGFVGGGFGGGGFGGGSSVSDVLLTGGEKQTMQNLNDRLANYLKVRALAEANT  
SLEIKINEWYQKQGPAPDRDYSSYFRKIEDLKNQILAASIDNASVLLQIDNARLAADDFRTKFETEALR  
LNVEDSINGLRRVLDLTLRSRDLQIENLKEELAYLKKNHHEEMNAPFRKQVSGEITVEMDAPGVDLT  
KILTDMRQYETLAEKNRKADEQWFFTKTEEDLNREVAINTVQLQTSKTEIIVELRRTIQSLEIDLQAQLSM  
KSALEGTLVETETRYGTQLGQIQGMTNVEEELAAALRCMDERQNHAYKILLDVKTRLEQEIATYRRLLE  
EEAHISSQYNATKSGKEVSKTTQVRMVVEELEDGKVVSSREQIQKNSY

>Snake\_K14L2  
MSTIRHYTSTSSSMKGPVFGSGENLVHFGRGCHAPSSHGAGGISVTNARCVSIGIGSTLGGTYGGSSY  
YSTFAGGHGGGLSGSLGGGLTGGFVGGSGSDVLLAGNEKETMQNLNDRLAAYLDKVRALAEESNASLEVI  
KEWYQKQAPGPDYSSYFRKIEDLRSKIVSATVENADVLLQIDNAKLTADDFKKNKFEIEQALRMSIESD  
INGLRNVLDLDTSTRILEKNLELLTEELLHLKKNHKEEMGLLQSQMGGEITVEMDAAPGVDLTKILADM  
REQYENLAEKNRRDAEQWFFSKTEELNREVAINTEQLQSQSEVIELRRTLQGLEIDLQAQLSTKAALG  
TLADIESRYSLQLAHIQGLIINVEEELATLRCDMERQNHAYKILLDVKTRLEQEIATYRRLLEGEAA

>Snake\_K117  
MPTTFSSHSMSGSIQGPGRRLALGRPQAVPSIHRVIRDKTRLSYGDGQGMFMDTNIILDMNEKGTMKNL  
NDRLAAYLDKVLSEKSNMQLEQNIQEFYTKQTSTGTHDSAYFNAMIQKSEIQKETLKNAGLLQIDN  
ARLAADDFRVKLESEVAMRLSLEGLDGLGRKALEELNASRSLQVQADNLQEEELACLKNHKEEVASLQG  
HLGGTVNVVEVDSMPGTDLQKVLGEVRDQYEGVMEKNRQEAELHQSQCDAINQEVSVSTEALQSAQMKMV  
ELKRLAQALEIELQSLWSMKEALEGTAEVESHYGLELSQLQNLVAAREAEELLQLKSDAQNAEDYKRLM  
DIKNRLEQEIATYRCLLEGESEPLTTPSPSVSRVKTIVIEELVDGKVVSSRMEVEHQL

>Snake\_K18  
MSFTKSTVLSAPPISAPPILSPLKFGIGGSAASVYAGAGGSGSRISVSRVSSLSNYGGGYGGGSGGGS  
YGGSSGGYGGMSGLYLSGSGVQNEKETMQDLNDRLANYLKVRSLAENRLEIQIREYMEKKGPSA  
RDWGRHFQIIDGLKNQIYDQSVDNARVVLQIDNARLAADDFRVKYEAEALAIRQSVESDIFGLRKYVDDTN  
MSRLQLESEIEALKEELIFMKKNHQDEVTTLQAQIANSGLTVEVDAPKSDLAKIMAEIRAQYDALAQKN

LEDLDKYWSQQISESTTVINQNSKEIETARVTMTDLRRTVQTLEIELESMRNVASLEGNLLEVESRYAM  
QIEHLNGLILLRTEAELSQRNDVQRQADDYQALLNLIKDKLEAEIATYRHLEGGEDLNLKDALLESTMQV  
SQKIHS TKIVDGKMSVSETSETKTLKR

>Xenopus1\_K18

MSYSRSVYSSSSVVGSSPYRSLSSAPRFIPSSSAASVHAGAGGSGARISVSRVSSVSGSGFGGGYSGVSNV  
NLIGGGQNEKETMQDLNDRLASYLELRVRSLEAANKKLEVVQIRQHEKKKPSKDWSPYYKTIEDLRKQVFD  
STLENSQLVLQIDNARLAADDFRVKYEAEAMAIRMSVEGDITGLRKLIDDTNVSRMNELEIESLKEELIF  
LKKNHQDDVTELQAQVARS AVTVEVDAPKSQDLGKIMTELRAQYDGLAQKNRDDVEKQYQSKVDEHTVQV  
NLDTEALHSKSSVTDLRRTVQSLIEIELES LRNQKASLEGLTHDTEARYAMELEMLGGTAMAMEAELVQV  
RSDCQRQQEYQALLNTRMKLEAEIHTYRRLLEGGDGSFDLQDAVPTVTTQT VKKVITTTQRIVDGKVVSE  
SNDTEVLKS

>Xenopus1\_02

MSCCKSCGSSRISVCGGYGTSVCSFNLGNSGGVCGTPAYCGSVSGGAAGGLGGEFGNYAAGWGTGAAAYGF  
GVGPEGLLAGGEKETMQNLNDRLAAYLNKVRALAEANS DLECKIREWYKHRNACMPDRDY SKYYHI IED  
LKKQIQCASVENARVILQIDNARLAADDFKLYENELCLRHGVEADINGLRKVLDELNLAKCDLESQIES  
LTDEIACLKKNHEEMKGYQGATGHLSVEMKAAPGNDLTKHLNDMRAEYEE LAEKNRKEAEARFNEASRA  
LKQEISCGAEQIQCSKNEITDLKRNLALEIDLQAALAMKKTLECSLAETEGNYCVQLSKIQA KISALEQ  
QLCEVRTDMERQSI EYEQLLDIKTRLEMEIET YRRLLDGESC IKSYPVPTPKPECKTRVIKTIVEDIIDG  
KIVSHQVTERKE

>Xenopus1\_03

MSYRSFKQSTKSVQHS SGGYGGVQVGGGYS CGVGAGAGYGGDFGYVGGAGGYAGGFGADGFGVGGGYGGA  
FGGQVGVF SINEKQTMQNLNDRLAS YLDK VHELEGKNAELERKIKDWYKHKGPAPPEAPRDY SKYFKEIE  
ALKAQIIAASKQNAVILLQCDNARLAADDFKQKFENEQAIRYSVEADINGLRVMDDLLTSRAELEGQLE  
SLTEELAYLKKNHDDVEVS IKVTEAGKVS VEMNAAPSNDLTKRLNDMRAQYEDLARNNRQEAENNFNRIS  
ADLKNQMHHVQITMDES RTEVTNLKKTLSQLQIELQS QLAQKNSLEILLAE TEARFCMKLSHLQETIACV  
EQRLQLRAESECRTEYQQLLEMKTKLEGEIATYRSLLDKLG

>Xenopus1\_04

MSQYSFKQSTKSVQYSSSGSNAGGGYQCGVGGGFGGDDGGFGGGAGY GAGFGAGGYEGGAGGFGGGGYGGGA  
FGGGAGFGGGAGFGGGAGFGGGAGFGGGAGFGGGAGFGGGGPGGLHVMSEKEMQNLNDRLAS YLDKVN  
ALEAANAELERKIKEWYDKQKPTSTTGEKADY SKYYKDI EDLKAKIIAASKENAALLLQCDNARLAADDF  
FKQYSESELHLRQTVEADINGLRVMDELNLAKTDLDSQFQGLTEELASLKKNHEDEVKGVQVTEAGKVK  
VEMNAAPSNDLTKRLNDMRAQYEDLAKNRQELNKFNAATGPVKEKIKEDVKEDTTVKTQISDLKRS LQ  
ALEIELQSLLAMKKSLELQLAETEGRFCKLSVLQENIASIEQHLEQLRAESECKDEYDQLLEMKTKLE  
NEIKTYQSLLDKLGAIQVTQGGQGGQGGQGGQAQDQSRGQAPQKH

>Xenopus1\_05

XXXMQNLNDRLAN YLDKVNALAEANAELERKIKEWYDKQPTTSDGGKDY SKYSLIDELNLKIKTNATKDNAGI  
TLQADNARLAADDFNNKYENERALYQMMNDNINGLRRVVDFTLSKFDLESQFEGLFEEMVFIKKKHDE  
IKGTQNTKLSQVSVEMKAQPGTDLTKI LNDMRAQHEALAEKNRREADRYNTMTAELRQQISAGAGQMQA  
SKTEISERKRTLQALETDLHSLKSMKQSLLEMLAETEGTYCMKLSRIQVTISSIEH LAQLKADSESQHS  
QYQQLLGIKTRLEQEIET YRRLLDGEGXXX

>Xenopus1\_06

MSYSSVKGSGGSGKGGYSIESGFNSIRCQLCAARGCNWCCTNCPVSNV FAGQGGGLGGGFGRFGGGSGG  
FGGARYGGGFGGGSGSGFGAGYGGGFGGGSGGGFGGGAKVAYEVTGTGGQYGS SVFGNEKETMQNLNDR  
ANYLDKVNALAEANAELERKIKEWYDKQPTTSDGGKDY NKYSLINELNQKILNAALDNAELALHCENAK  
LAAEDFRLKYESEWTLQAVVSDINGLRKLMDDLTLKS SLESQIESLSEELAYLNKTHDEEIKGTQNTK  
LSQVSVEMKAQPGTDLTKI LNDMRAQHEALAEKNRREADRYNKMSAELRQQISAGVGVQVTSKTETSEL  
KKTQLALEIELQAQIAKKQSLLEMLAETEGSYCMKLSRIQVTISSIEH LAQLKGDSECQRSKYEQLLGI  
KIRLEQEIEMRYKLEGGGNSQTS DVGQRRGGSGTSDTTVRTITVKKIVENVVNGKVVSKEEVIERL

>Xenopus1\_07

MALAHGAYDVTGTGGQYDGGFSGNKKETMQNLNDRLAN YVDKVRVLEAANAELWKIN EWYDKQRSTSDG  
GKDY SKYATLIDDLKLLISTTKDNRGIPLQSDNARLAIDNFR LKYENEQILHHSMEAAINTLHRVIDDL  
TLKS KLSQLESLETEELAYLKKNHDEETKGAPKATRQVSVELKATPGTDLTKI LNDMRAQHEALAEKN  
RREAEDRYEKL SADLKQRI SAGAGRVQTKGSEI SELQRTLRALEIELQS QLAMKQSLEVTVGKTEG SYCR  
KLSRIQVTISSIEH LAQLKADSESQHSQYQQLLGIKTRLEQEIET YRRLLDGEGXXX

>Xenopus1\_08

MTSIRQSRSMGGGNSMVRKSVQTFQRVGSAGGGGFGAGGYGGMGAGGMVMNGVGYGDFEGGYGVE  
CNEGFGAGGFGGGFGGGAGGVYGGGAGGGFGGGAGGGFGGGAGGGFGGGAGGGFGGGAGGGFGGGFGGGF  
GGRGPGGFEGLLATNEKHTMQNLNDRLAN YLDKVALETDNNDLEKKIREWYKLRPESSGGVGTVDYSKY  
LPIEDLRKKIMESTLENAKIILQTDNARLAADDFRLKYENELALRQSVEADINGLRRLVDELTLCKADL  
ELQIESLLELAYLKKNHKEELDALRGGPAGQLTVMENNAAPAVDLTKLNDMREQYETLAEKNRRETEAR  
FNEQSKDIKKEI LAGVQVQSNTEISDLKRS LQGLEIELQS QLAMKQSLEKT LAETEGRFCSQLGQLQN  
LITSV EQLFQLRNDMELQSNEYQLLDIKTRLEQEIET YRRLLEGGGKLLAGMSDGKTPSDSSKSSSR  
TRRVKMVIEEVNGKVISSSVREIEEKH

>Xenopus1\_09

MSLRSSSSYSVQSKSVSGGGFGSGYGASFSGGFSFGGSGYGGSSFGGGFGAGFGGGAASGFSASSAGGFG  
AASASSFSFGGSDKQTMQNLNDRLAAYLEKVRALAEANADLELKIREWYKQRTSGIGAGAKDFSKYF  
DIITDLRSKILFATIDNSRVVLQIDNAKLAADDFRLKFENELALRQSVEADINGLRRLVDELTLARGDLE  
MQIESLLELAYLKKNHHEEMSIAKSSAAGQVTVMEDAAPGTDLTNI LNMRADYETLAEKNRRDAELWF  
NQKSGELKKEIITGVVELVQSSKSEISDLRRSLQSLIEIELQS QLAMKKSLEDSLAETDGRYGAQLQNIQLS

IRSLLEEQLLQIRSDMERQNMAYKQLLDIKTRLEMEIETYRRLLEGELESSSSSVQVITSQSSSSSKDPS  
KTRKVKTIIVEEVDGKVVSSRVEEVEENVK

>Xenopus1\_10  
MTSYRSSASYYSSSSGKGGFGSSYGGSSFGGGFGSGAGSGFSSSGGNFAMAAADSSNLSNFGGNEKHA  
MQNLNDRLASYLEKVRSALEASNVTLLEGKIHDWDYDSKVDAGIGAGSKDYSKYFEIINELRSKIGAAATVGN  
TVTLQIDNARLAADDFRLKFENELALRQSVADIAGLRRVLDLTLARGDLEMQIESLTELAYLKKNH  
EEMSHAKSQSAGKVSVMDDAAGVLDLTLNINNNMRADYEILAEKNRRDAELWFNQKSGELKKEISVGEVQ  
QASKSEITELKRSLSLEIELQSQLAMQSVGNLSEVQGFYSAQLLQIQNTISSLEEQLLQIRSDMEHQ  
NMEYKQLLDIKTRLEMEIETYRRLLEGELEGMQTTVAKASSVESKTESSTRTTMVKTIIVEEVDGKVVSS  
RIE

>Xenopus1\_11  
MTSYRSSASYYSSSSGKGGFGSSYGGSSLAGSGFGGGFGSGAGSGFSSSGGNFAMAAAASSLSNFGG  
NEKHAMQNLNDRLASYLEKVRSALEASNVTLLEGKIHDWDYDSKVDAGIGAGSKDYSKYFEIINELRSKIGAA  
TVDNATVTLQIDNARLAADDFRLKFENELALRQSVADIAGLRRVLDLTLARGDLEMQIESLTELAYL  
KKNHEEEMMHAKSQSAGKVSVMDDAAGVLDLTLNINNNMRADYEILAEKNRRDAELWFTQKSGELKKEISV  
GVEVQVQASKSEITELKRSLSLEIELQSQLAMQSVGNLSEVQGFYSAQLLQIQNTISSLEEQLLQIRSD  
DMEHQNMAYKQLLDIKTRLEMEIETYRRLLEGELEGMQTTVSKASSLESSESSSTTTTTRTRTVKTIIVEE  
VDGKVVSSTVS

>Xenopus1\_12  
MANMYRTIAVDRAISSPGGNYSIIPQTRYAGSVYGGAGGYGTKISKSSSYSSGYGGSSSLLVNTNSDL  
LLNGNEKQTMQNLNDRLATYLEKVRSALEASNVTLLEGKIHDWDYDSKVDAGIGAGSKDYSKYFEIINELRS  
TMVNAEILLKIDNAKLAEDDFRLKFESERSLKI GVEKDIIGLRKLIDDLNLQRIDLEHQYESLQENLAYL  
RKNHEEASVLRNQITGHINVEVDAAPSVDLAKVLADMRAQCEAVVSKIKQDAKQFQFETQIEEVNIQIGG  
NVTELEKHRSSVKEVVRHVQSLLELQSEISKKDALNATLNNINAQYAAQLLHMQTAIKCIEEQLIQIRS  
DMSRQSQEYIILLNIKLRLLELEIETYRRLLEGEDV

>Xenopus1\_13  
MSSSSSFQTVVSSSKVKATRTSSYGGFSSASLSGAGFGGSTATQSSSLSFNNNFGGSDDLLAGWEKHTM  
QNLNDRLAAYLDKVRSALEASNVTLLEGKIHDWDYDSKVDAGIGAGSKDYSKYFEIINELRSKIGAAATVGN  
LQIDNAKLAADDFRMKYENELALRQSVSDVNGLRVLDLTLARSDELQLEGLNEELAFLLKKNHQEEI  
SSIKVGSQVTVEMDAAPAVDLTLLNINNNMRADYEILAEKNRRDAELWFNQKSGELKKEISVGEVQVQ  
SEISELKRQTQTELEIELQALLSMKSSLEGTSETEGRYCLSLSQIQMRISSEIEQLHQIRMDMSRQNEDE  
LRLLDVKTRELEIETYRILLEGELELVNVEKVVQVVEVVKDPKTRKVKTIIVEEVDGKVVSSSVQVEVE  
EKLN

>Xenopus1\_14  
MYKHVVVKGGHVQVGGSSGNYRKISVGGYASSVYAGAGGRNTKVVSTDGSPGELTSRHLIYKTVSIGGNE  
KETMRNLNRLATYLEKVRSALEASNVTLLEGKIHDWDYDSKVDAGIGAGSKDYSKYFEIINELRSKIGAAAT  
LLQMDNATLALDDFKMKLEYELNLGAAVEKDLSELKRVVDDLTMTTRTDLESQIESLKEEMVYLKKNHTQ  
DMVGLHKQEGTIDVEVDAAPSVDLGKTMEDMRSQYEQVLEKQRLAKYGFDRKVEEWNVEVQNTAELEK  
CRKDLSELKHKVQDLEIESQAELSKRKAAGNALDNVNSRYTMELADKQEKIARFEEHLQQTTRRDVGFQIQ  
EFTILFDLKNRLEAEISTYRRLDAEGQ

>Xenopus1\_15  
MSFNSNFHFSSSSSFSETFSKVRISSSSSSSSHSGNSGSRTCISKPNFPSPSGTDFDCTMDFRETLSAPNGK  
ETMQNLNDRLASYLEKVRSALEASNVTLLEGKIHDWDYDSKVDAGIGAGSKDYSKYFEIINELRSKIGAAAT  
KLQMNENAKLAFDAFKRYETEKTRTALEGGDLESRRAMDNLTIVRTDLEMEVEGMKELIYMRMGHEED  
IKLAQFQKKGASVDVKIDAPPSVDLAKTIAEIRKEYETLIEKNRREASEWYSHQXXXXXXXXXXXXXXXXXX  
XXXXXXXXXXXXXXXXXXXXXXXXXXXXXXXXXGLEGTLAETEAANAAGLQKIQATICRMEAELSNVGELERQ  
IEYRALLDVKTRELEIATYRELLEGDKTGGRSRNSEGGGKITITVQDMVNGRVISSKVSIEPKKL

>Xenopus1\_16-HK  
MGGGLGGRSEGLLNVEKQETMQQLNDRLANYLGRVRSLEEENGQFERRIREWYDKQVPYNFDPDFNNFFRT  
IEELQNKILHACTGNANLILQIDNARLTSDDFRNKFESEAAFRMGVEGDMNGLRRVLEELNNGNDQEIQ  
RQNLSEELTYLKNHAEVGSRLTQLGARVNVEVNAAPAVDLNQLVGEIRDQYETIVERNRREANWFLN  
KSEELNQMMSSADQLQTVHTEVIQLRNTVQGLEIDLQSQNSMRSALEGLTADTESRYGGQLSLOQLFLN  
NVETQLGSLRSDLERQNFYKALMDVKTHLEMEIATYRRLLDGEDRQGRSQRSGEVRDMGNSRNRSTVTMV  
EDIKEGFRKA

>Xenopus1\_17  
MSYSLSSSSSRMSSGISRSLSDGIYRAASMGGYGGSGVSMSSAKFTSAAGSGMGFGSGFASGASAGSG  
AFYGASFSSGGDGLSNGEKYTMQNLNDRLASYLEKVRSALEASNVTLLEGKIHDWDYDSKVDAGIGAGSKDY  
TLYTTIIGELRQKILAAATINNSKLVLEIDNARLAADDFRLKFENELALRQSVADIAGLRRVLDLTLARGD  
DLELQIESLKEELIYKKNHEEVESEKQHAAGTVSVELDAVPGVGLLNTLNDLREQYESIADRNRREAE  
AWFLSQVEGLQKEVSSSTQQIQSTKSESTELRRGLQSLLEIELQSQLSAKAGLEASLAETEGRYAAQLFQI  
QNISSMEAQLSDLRSDLERQNFYRLLDIKSRLEQEIATYHQLEGGGLIAGANSSSSGSSSGSTTT  
RVHAIKEESGGKVVSSSTLLKSF

>Xenopus1\_18  
MSFSSSRVGRSTGVYGAAPGLGGYGGSGISKSTVRLTSSALGSNDLSGFGGSGAGSFSTSLAFTNGDG  
LLTGNEKSTMQNLNDRLSNYLEKVRSALEASNVTLLEGKIHDWDYDSKVDAGIGAGSKDYSKYFEIINELRS  
AAFDKNRVLLGLDNARLAADDFKFKYENESHMRLNVEVDINGLRKLLDEMTLSRADLELQIENLKEELT  
YMKKNHQEEMGAKSQQVIGNVNVEMDAPPMDLTKILSEMRENYEYLSMKNRRDLETWYLSQSESLQNKV  
EYITEQTSKSEITDVRNVQGLEAEQLSQYSKKAATEDALADTEERYAMQLSHIQSIIGGIEAQLYDLRY  
DLEHQNHQEHKSLLAIKSHLEAEIATYHKLLEGEQEFISIGDSKSGSGGTATITTTITTVVKEEVESSGQKQ

>Xenopus1\_19  
MASYSVRQTSSSSSYRGLGAPMGAGRMFAKAPSVHGGYGGQGISVSSAKFVSSGIGGGLGGGSYGGGFSS  
GYGAGSGYGAGSGYGAGLSVNVSGDVLVLSGNEKETMQNLNDRDLAMYLDKVRALAEANSGLLELKIREWYEK  
QGPSPSRDYSHYFAIIEDLRGKILDATVDNSKIVLQIDNARLAADDFRTKYENELALRQSVCECDINGLRK  
VLDELTLCRTDLEHQIESLKEELAYLKKNHEEEMNAMRGQVGGQVSVVEVDAAPTVMNKKLAEMREQYEL  
LAEKNRRDAEAWFFSQSEELNKVVATHTEQIQTSKSEITDLRRTIQGLEIELQSQLSMKAALENTLSETE  
ARYGMQLAQIQNVIGSIEAQLADLRSDMERQNHEYKLLMDIKTRLEKEISTYRQLLEGHDAQIGGGKHKD  
AKTGGK

>Xenopus1\_20  
MTMQNLNDRLANYLKDVHAALEANAEELEKKIKDWYNNHRPASSKAPDYGEYFKTIDDLQNKIIAAYANNH  
KAILAVDNTRLTIDDYRLKYENERALRQSAEADISGLRRVMDLTLCKSDLEAQVESLTELAYLKKNH  
EEVKAMQGGATGAVNVEMNVAPSVDLKSKSMADMRAEYKLAERYRREVEEQFQAMTKDLQKQVVASVREV  
QTSKSEITDLRNVLQSLIEELQSQLSMKAALEASLAETEGQYCVKLSHIQELILRVQNNISDIWTQMETQ  
SSEYKLLLDIKSLEQEIATYRELLDAQDIK

>Xenopus1\_21  
MSLRLGSATGKGSVFESSGVSASNSRGRAGGVYGGGAHVVNAGSLRSGYGGHGGHGGSRGVGFSGAS  
AGGVCFDSGVGFHGGESGFGGAGYGGGYGFGAGYMAAGGHRSGFGEPEGLLSLNEKITMQNLNDRLA  
TYLNKVKSLLEEANTDLEKKIRNWYDTHGSPVQEKDYGPYRTIEDLQKILGATIDNGRIVLQIDNAKL  
AADDFRMKYENELILRQTVESDINGLRLLDDLTLNRSDESQLENLKEELAGLKKNHEEEMKALKVQLV  
GDVTVDMKAAPGIDLQKVLGDLRHDYEQIMQKNQKIDIEFWYQEKTAELRKNVSGSTQEIQTNTQVTELR  
RTLQNLIEDLQALSTKAALEASLAETEGRYCQLSQLQALIQNVEAELANIRCEMENQSHEYKILLDIK  
TRLEQEIINTYRNLDDGGQTQFPKGSYDSSSSGQSDKQGGSSYYVRTRVEDGDGKVVSSRDQYHHSYK  
Q

>Xenopus1\_22  
MSSYSIRQTTTSSGSMKGLGGFGGSSSRVSGVYRAPS IHGSGGQNVSISSTRVMSGMGGGYGSCGVVAG  
LGGGMSNYGGYGSYVFGGAGGGLISGSEKYTMQNLNDRLAAYLEKVRSLKANGELEIKIRDWY  
QRQAPGPAADYSHYKTIEDLRNKILSATMDNAGLLQIDNAKLAADDFRTKYETELALRMNVEADINGL  
RRVLDLTLNRSLEIQIESLKEELAYLKKNHEEEMIALRGQATGQVNVEMDAAPSSDLTKTLEAMRIQY  
ENLAEKNRRDVEEWFKKTEELNKEVANSSVMIQSSKTEITDLKRTLQSLIEELQTLQSMKAALEGLAE  
TEGRYCVQLSQIQLISSVEAQLGELRSDMERQSHEYKILMDVKTRLEQEIATYRRLLEGEDAHLSSQKDG  
PKTTRQVRTIVQETVNGNVVSSREDVRKLPY

>Xenopus1\_K117  
MSFSTRSVSQSSRYGVLASPMVNRALS VAGGAQTVRMSSAKLTSSAFAGPSALDVSSFGNNGKETMQNLN  
DRLASYLERRVRSLEQANHELELKI REYCEKKA AIGSPDVSGYINI INLRSQINDASIDNARLVLQIDNA  
KLAADDFKIKYESELAIRTGVESDI IGLRRVLDLTLNKTDLLEIESLKEELIYKKNHEEELAVARAS  
ARGQVDVQVDSAPPVDSLQIMSDVRAQYEGMMEKNRQVEAWYRGQSENLNKEVATNTAALQTSKQITD  
LKRTIQSLEIELQSLLSMKGALGTLAETEARYGAE LNHLQAMITQIELDLQNLRSDAERQSLEYKLLLD  
AKTRLEMEISTYRRLLEGEDTRFSQTETQKAVTIVSKEQSKSSIKKVKTVIEEVVDGKVVSSRVEEVTEK  
S

## B

>Chicken\_K80  
MTNLCKAFSSGSLCSWEASGRMSQGRAGSTSPDSLGHCSFSSVTPSPCGAPYDGGYQSSSYLSIDGRLL  
APVHLDIDTDFHAVREQEKEDIKLLNNGFVTLIEKVQCLEQQNKILTRWNLFLKQDQNSHSES DVKAIYD  
QYMSKMNQEMQALNIEQENLESELTEVLSTMDNFRSKYEDEIRLCSGMEYTFMELKKDLDASTLHRTELE  
VKLSGLQELMDLKKTIIEQELELLTEIKDISVVLGIDNTCKLDLSRIVEEVRAQYEAALRSWEEAEAL  
TRRKLNEGNTQSATYGGHLLDSRREIADLNIQIQKLRSCIVSQKSCQCLYLEENI KEAGEHGEMALKDACA  
KLVKLEALQKSKEDMAHLVKEYQELMNIKLALDLEILTYRKLVEGEESMESPIPTVISTIH SRPKHLS  
ASTLRNSKLFARGTSSANGEMKLNNGNTKPLPSRSHSNLAPEADPYTCSARPKLSSLLTECS

>Chicken\_K7  
MSRSVFSRRAVAVPGVSVRVSSVSRGGGSLNKAGGFGSSSLYNLGSANKRISLGGSSSYSVRSYG  
YGGMGFGGAIAPASAGIQEVTVNQNLLTPLNLEIDPNIQVRKKEEKEQIKTLNRRFASFIDKVRFLQEQNK  
MLETKWLLQDQKTTRSNIVPMFEAYITNLRRLDGLLNDKGRLEGERNMQDLVEDFKAKYEDEINKRT  
TAENEFVVLKQVDAAVMNKVELEAKVDALDTEINFLRSLEYAELRELQAQISDTSVVLMSDNRNLDLD  
SIIAEVKAQYEDIANRSRAEAEQSWYQSKFEALQVTAGKHGDDLRNTKNEITEINRVIQRLQGEIENAKAQ  
RAKMEAAIAEAEERGLAVKDARAKLEEAALQKAKQDMARQLREYQELMNVKLALDIEIATYRKLLEG  
EESRLAGDGVGSVNI SMVSSGGGSGFLGGVVRGGLALGAGMGSGALGFSSGGSTKSYTVTTTSSSTRSF  
RK

>Chicken\_K84L  
MSCSYGTNVGRVGNFSSSVALSRLNQSFRVLCRQRGLGSFSTRSLSGVASSRPRIAVGRCPMPRCGYG  
LGAAGAGLGCAGGAGFYRVGGSSRPCTIVPITVNEKLLQLQLLELDPNVQTMKYQEKEQIKTLNKKFASF  
IEKVRLLQEQNEVLETKWSFLKGQKHGRNTIVPMLEACIGNLKKQLEALGCNRRARLETQLKAVQEALETN  
KKIYEDERSRRSSTEKELIALKKDVECFNLKAEALGAKVGRMEGEFGFLRVLYEEESQQLRAHISDTAVV  
VQMDNSWPNLDGIVANVKAHYEDTACRSRAETEAWCKGKFKELQVTAGRNADSLQEKKREAAELARMVK  
KLSGEVRSKQCKLETAVADAEQRKEMSIKDAKSKLLEAALQKAKQDLARQLWEFQELMNIKLALD  
VEITTYKLLLEGEESRLCAEGGVFINISLPFTA VCHSQGGLAYSPEPSFAGLANGSSRIRSGSTHVKKVVS  
MGKSTM

>Chicken\_K5L3

MSRQCTVRSQGRGTFSAASAFAIPASACSTGFISSRVAQGGSCSTAAGYGGFGGGFSGRSLSYVSGCKRISM  
AGRGSFGFYGPAGFAGTGISCGFGGAFGFGGGMGPGFPAVPTGGIQEVSVNQSLKPLNLAIDPSIQSI  
RKEEKEQIQTLNKNFASFIKVRFLQENKVLTKWALLQEQGHKTVRNNIEPLFEAYINNLRQLSSLL  
ADKENIGGELSKVQSLAEDFKSKYEEEINKRTAAENEFVILKKEVDSTYMTKTELQARLDALLEEIDFLR  
ALYEAELSQLQSQIADTFSVILTMDDNRRSLDMSIIAEVKAQYEDIAAKRSREEAESWYQSRYEELQATAGR  
HGDDLRSRKQEISELNRHVQRRAEIDSVKKQCASLQTAIADAEQRGELALKDARDKLALETALQQA  
DLARQLREYQELMNVKLLALDIEIATYRKLLEGEERCRLS GEGAGAVNISVTRT SVGSGYSGSGCQGFGRSS  
GAGAGLCAGGMGFSSSGQGMAGSCVVGSSSSSMQYISSSSTKRCY

>Chicken\_K5L2

MSRQSTVRIQRGRSGFSAASAIVPGTCRTSFSRSVTRVGGCNAAGSGFARVGGGFGSRSLSYVSGCKRIS  
AAGRGGGFGYGTAGFGGGAGSMLGYGYGAFGGPGFPAGGIQEVSNQSLKPLNLEIDPSIQIRKKEEKEQ  
IKTLNKNFASFIKVRFLQENKVLTKWALLQEQGMKTVRNNLEPLFETYINNLRMQLNLSLSDKGRLE  
GELVNTQYLVDFKFKYEDENRRTIAENEFVTLKQVDASVMNKVELQAKADALTEEINFLRALYEAE  
SQMQTQISDTSVLTMDNRRNLDDLSIIAEVKAQYEDIAANRSRAEAEAWYQTKYEELQATAGRHDLLRS  
TKQEISELNRHVQRRAEIDSVKKQCANLKAIIADAEERGEIALKDAKAKLALEDALQQAADLARQLR  
EYQELMNVKLLALDIEIATYRKLLEGEERCRLAGDGPVNI SVTRT VVGSYGGGNSLSMGGGMSMGNYS  
CSGPGSSALGGSSSVKFFSSSSSRRSYRS

>Chicken\_K5L1

MSRISYRSSTGGMRGFSGSAIVGSGGGTRSSFSSVSVRVGGGRAGGGGFGAGGGFSGRSLSYVNLGG  
SKRISLGLRSGAGVGYFGGGAGFGLGYGGGAGAAALGLGGAGGGGGLGGFGMGGPGFGRGGPGFPV  
CPGGIHEVTVNQSLAPLKLDDPEIQKVRTQEREQIKTLNKNFASFIKVRFLQENKVLTKWALLQ  
EQGHTVTRKSLPLFETYINNLRQLDLSMGERGRLDSELRSMDMVEDFNKYEDEINRRTGAENEFVV  
LKKVDGAYMKNKVELQAKADGLADEINFLRALYEAELSQMQQVSDTSVLLSMDNRRSLDLSIIAEVKA  
QYEDIAANRSRAEAEAWYQNKYEELQVSAGRHGDDLNRKMEISEINRMVQRRLNEIESVKKQCANLQAAI  
AEAEERGERMALKDAKSLAELEDALQAKADLARQLREYQELMNVKLLALDIEIATYRKLLEGEESRLAGE  
GVGAVSVVSSSSGMGYGGGMMGGGLSTGGGLCMGGGLSMGSLGMGGGGGSYTMSSVGGGGFGGGSGS  
YSYGGGNSFSSSSSRGVSSTGGSVRIVSKTTTSSKKTIR

>Chicken\_HBS1

MSRQCYTSSLLGRRGFSASAVCGLRAGSSASAVCPAARRCGLGGFSSRSVCDLGRGQRISFGGSCR  
SAAYAGSVGRCTAYGGGRFVGTVVGFNGCGGYGGLGGYRGLGDGVAMGGYSGGISIGLGGGRSEGIR  
GVSIIHPELLKPLCVGVDPEECQVTRTHEKEQIKNLNNQFACFIKVRFLLEQQNKVLTTKWELLQYVLPAS  
RRNLEPVFENFICNLKQLECVLGERERLENERCLRDVLQYQKCYEDEINKRTAAENEFVVLKQDVC  
LYLTKEELEVVRGLLRQQLFLKCIYAEERAQMDQCQLCDTSVIVQMDNSRDLDMEGIIKSVECCYEEIAQ  
KSKAEVFAFYQTRLEQALQAKDKMACLLRDYQELLNKLLALDIEIATYRKLLEGEESRITGPNPVSVA  
VSGGGTVGECRSLSGIGGKCSVKTGASSGLGGVVSFVSGAGFSARSVDCVPRVGGGFARSAAACVGR  
EVLSGADLQCAAGVGNLVACAGVEQCSPGTVIIPGPGVCGGNRYSTAVRVVTRSR

>Chicken\_HBS2

MSRQAPTVRVSVLGRGFSASEICGRSYAACQPARCAAGAYSRSRVCNLGGSRRI SYVNGVCGNGCFGD  
FGFGGVGYGNAGGRVSLCGPRGYSIVRGYPDRKGEQIQGICIDERLLKPLCVGVDPLEHEIRCEKEQI  
KTLNTQFACFIKVRFLQENKVLTKWALLQYVLPKKGKNELELYFENYICDLRKRDLCLLCEKQKLG  
EACATSQLVEEFKCYEEEINRRTTVENEFVALKDDADCI FLNKEELEVKVDLRRQLLELLKCVFEEERA  
QVDRQLCDTSVIVKMDNRRDLDMESIIKNVECWYQEIQAQSKKEEVDAFYQTRFQELQDKRGKYCDDLQSN  
KCEISELTRMIQKLQCELENVKKQVSCQTSICDVEQRGDCAKLDAREKHVELQNALQAKADELACMLRD  
YQELLNKLLALDIEIATYKTLLEGEESRIVGNPVSVS VSSGYNIPDDCGMLAANAACGYGSLGRRSG  
RHSSQNGGFSRSAGIHPKRVLSSVAKPCVPEVFCQAGGVNCKTGGFSSRGGYPARTVISTASGGLNAR  
MGACQPGGVVSVFNGQCVIRQLAGPPVMVSSPEVVACNNGVGNFVVRDPCVVP

>Chicken\_HBS3

MSQQLAAGRALHGRKFSASSAGGVVSCRRSSAFPSTAPFGRGYGTWSSRSLQNMDCGCKWISSGICASGEC  
GRHGRMLGFHCGGREGIRAVHVNNLLRPLDVKIDPEIQIRIRQERQMRSLNNQFACLIKDVQHLEQQN  
RLLATKWAFLQKHILPSQKNFKHVNTFICSLQRRLDLSLHERGQMELELNNTKLI EDLKCKYEQEVNR  
CTAAENEFVLLKDDADCVYLTKAELEAKLETTLKQQI ELLKCMSAQGTAEMEKSLCSDTSVVKMDNSRSLD  
MEGILRGIELWYEDVAQSKAELDALYRTRYQELEETKRRKQCSSELKSHQOEIEELS FVMQRWQCDLENVK  
KRVSSLRTSVSDTEQRGDRALKDAREKHLELQNALQAKADELACMLRDYQELLNKLLALDIEIATYKTL  
EGEESRITGCPVRVLIITPCNTSSGCSSTLGHGPGTASRCKGSSPGASRASQPGNDGVYHRGTS SAGK  
QCVPSGPRCGCFPRGHQRSCRGKHTCQSSAHVSAAE LCCGTAGSSESSAQPSAPCWIGARSSAGTPCSR  
STTRV

>Chicken\_K78LT

MSHHFFRFQDGNFSSSAHCGTLGSGRGSAMSHWEDDGGQRFGGYGYGYGHYGSRSRLHNLGFRNFST  
GGIYGGDGGWYGRHGGYYDGRYLDLDRDLGRRVYFVGDQGGAGRMYGSSSRGMLSGGLEQQAGQSGHP  
AAGGGIEEVHVNTNLLRPIQVQVDFEFQRMRSDEKEQIKTLNSNFASFIKVRFLQENKVLTKWALLQ  
QQSSRPEESRSITSFFQSYINNLQRQLDMLQSQKQLDPEAYEMLQLVEDYKRRFEDEINKRASKEEYV  
ELKKELDSTYMRKMEFEVVRVEILKQLEFLRCLYEAELSQLQTVVDNTNVLSDMNGREVNMMDGIIIEVR  
EYKEIAQKQKDEVNAMYQGRYQDLQNMNRVNQREQLRYTYQEIQELTRQIQRLQPEIEIVRRENDSRQEA  
IRDAEQRGSSAVKDGKQLQELLENALQQAAREDLARILHDYQELLNKLLSLDVEIAMYRSLLEEEETRIQE  
GSPATVVRVTRSGSSAEFGFRQYGDNLNREKEEMSTDDSNRMTWTEITPGGGREGERRDSGSTYSGREHRG  
GEAGRYHTGRSSGSSSYGYETGGRI SRAGSTSGGGHSSGGFGSSGSGRCSPHGGGLSSGGSSGSGRRG  
SISGEGSSGHGSSSYGSGSGSICGGGSSGSSSGGSSGSGSFGSGSSGGHSSGGFGSSGSGSGRRGSI S  
GGSSGHGSSSYGSGSGSICRGGSSGAGSGSGSFGSGSSSGGGHSSGGFGSSGSGRCSPHGGGLSS  
GGSSGSGRRGSI SGGSSGHGSSSYGSGSGSICGGGSSGSSSGGSSGSGSFGSGSSSGGGHSSGGFGSSSGS

GSGRRGSI SGGGSSGHGSSSYSGSGGSI CRGSSGAGSGSGGSGSGSSSGGGHSSGGFGGSSGSGR  
CSPHGGGLSSGGSSGSGRRGSI SGKEEAQVMGDRAMAVEVEAPSVEEALGPRPEALAVVGRLEVATA  
LEALARALAADLAGEGPFLEAVEAQVMEVPAMAVEVEAPSVEEALALGQDLGVALAAVVRHLEVATALE  
ALVEALAVAAVLTVEG

>Chicken\_K78L4

MSRQSVCRSFGGGSRRGYSSCSAVGGGFGGSGGRSRISSYSSFTSRGTGGGRCGGFSSRSLHNMGGSGR  
ISMGGSYGGYGCRIVLGGGYYGGGFGS IGGGVI GGGVGSFGGVPVGGPGFPGGIQPVQVDSLLRPVHV  
DIDPQIQVKCQEKQIKTLNNQFASFIDKVRFLQQNKVLS TKWELLQQQGPSGPRKNLDVIFENYIQG  
LRRRLESLGQRGELESELQNMQRQYVEEYKTKYEEEINRRTAAENEFVVLKDKVDCA YMTKVELEAKVGA  
LTDEISFLRCIYEEELAQMQTISRDL SVVSMNDRHLDLDS IIEVRRQYEQIAQNSRAEAEAWYQSR  
EELQTTAGRHGDSL RNTKIEIQELTRNVQRLRAE IENVKQKQNLQAAIAEAEERGEMALKDARRKLEEL  
ECALSKDKEELARLLKEYQELLNKIALDVEIAMYRKLEGEENRLCNDPNSNVNVSVVGRTTIAGGRAG  
FGGAGSGVGGVCTVGGGSI IGGSGCVGGGVYNGGFSSSGSRMCSGGGTFIPTGASSVRCVTTTTVKS  
SGVKY

>Chicken\_K78L3

MSRQSACRSYGGGSRRGYSSCSAIGGGFGGGGSRSRISYSSYSSSRGGGGGQCGGFSSRSLHNMGGSR  
GIAVGGCYGGGGRMGGYGGIGGYGRGICGGMGGYGGIGGGMGGFGGMGGGMGGGMGGGMGGGIG  
GGIGGGMGGFPGFPGGIQPVHVDSSLLRPVHVEIDPQIQVKVKEQIKTLNNQFASFIDKVRFLQ  
QNKVLS TKWELLQQQGPSGPRKNLDAIFENYIQGLRRRLESLGQRGELESELQNMQRQYVEEYKTKYEEE  
INRRTAAENEFVVLKDKVDCA YMTKVELEAKVGA LTDEINFLRCIYEEELSQMOTISRDL SVVSMNDR  
HLDMSIIEVRRQYEQIAQNSRAEAEAWYQSRYEELQTTAGRHGDSL RNTKIEIQELTRNIQRLRAEIE  
NVKQKQNLQAAIAEAEERGEMALKDARVKLEEAALSKDKEELARLLKEYQELLNKIALDVEIAMYR  
KLEGEENRLCNDGMSNVNVSVVGRTTISGGRGMGGGFGGSGMGGGFGGSGMGGGFGGSGMGGGFGG  
CGSGGGFGGSSGGSCMGGMYSGGFSSSGSRMCSGGGNFSSGGGSSSIRRCVTTTSVKSSGVR

>Chicken\_K78L2

MSRQSVCRSFGGGSRRGYSSCSAIGGGFGGGGSRSSYSSFSMSRSGYGGGRCGGFSGRSLHNI GSSGR  
IAMGGCYSGGGYGGRMGGFGGGYGLGSYGGMGGGMGGGFGGGMGGGMGGGMGGGMGGGMGGGMG  
GGYGGPGFPGFPGRGGPGI QPVQVDP TLLQPVHVEIDPQIQVKVKEQIKTLNNQFASFIDKVRFLQ  
QNKVLS TKWELLQQQGPSGPRKNLDVIFENYIQNLRRQLDSILAQRGQLESELQNMQQYVEDYKKNYEE  
EINRRTAAENEFVVLKDKVDCA YMTKVELEAKVGA LTDEINFLRAIYEEELSQMOTISRDL SVVSMNDR  
RHLDMDSIIEVRRQYEQIAQNSRAEAEAWYQSYEQLESTAGMHGDSL RNTKIEIQELTRNIQRLRAEIE  
ENVKQKQNLQAAIAEAEERGEMALKDARVKLEEAALSKDKEELARLLKEYQELLNKIALDVEIAMY  
RKLEGEENRLCNDGMSNVNVSVVGRTTISGGRGMGGGFGGSGMGGGFGGSGMGGGFGGSGMGGGFGG  
GMGGMGSGGGFGGSSGGSCMGGMYSGGFSSSGSRMCSGGGNFSSGGGSSSIRRCVTTTSVKSSGVR  
RF

>Chicken\_K78L1

MSRQSSAFKKGFSSSSACLGGKNKVTFTSTVARGCRGPAGNAGGFSSHSLSYSLGGCKSTALGGFGAGGICR  
FGGAGGQGFYGVNGIGIFGGGAGCGFGGGFGGGFGGGFDGGVGGFAQC PPGGIKEVTINQSLTLP LHEI  
DPEIQKVRTQERELKTLNNKFASFIDKVRFLQQNKVLETKWLLQEQSPTSTRSLDPYFEAYISRLR  
KQLDGLSSEKIQLESELKSFQDMVDFKTKYEEEINRRTAAENEFVVLKDKVDGVMNKNVLELQAKLDSLA  
DELNFRNLNLYETELCQMKTVDTSVVL SMDNDRCLDLS IIAEVKAQYEEIANRSRLEAEAWYQSKYKE  
LQATAGKHGDSL RDTKAEISELNRV IQRLRAE IENVKQKCESVQSSIA DAQRGELALKDARDKLELET  
ALKKAKADLAQQLRDYQELMNVK LALDIEIATYRKLEGEECRMSGECQSNVSI SVVGGSSS IGGYGGG  
LCLGGGLGFGSGSRGSCSTGGAGFCYSLGGGFGSSGTGSSV VVGGVGLKNSSVSARRP

>Chicken\_K8

MSVTITRKSVRSSAVPVRFSRSTAGTPTVRMSAASAYGTLSGSRFVGGVLRGPVAVSGGGIAAVTV  
NQSLTLP LNLDIDTSIQQVRKEKEQIKTLNNQFASFIDKVRFLQQNKVLETKWLLQSQQPQRSDLRG  
LFEGYVGT LRRQLEGLQERLRLEAEELGSMQGLVEDFKNKYEEEINHRTEKENEVVLKDKVDDEAYMSKV  
ELESRLSLESLTDEINFLRQLYDELSQMOTQISDTSVVL TMDNDRSLDLS IIAEVKAQYEDIANRSGLEA  
ESWYQTKYELKTTAGKHGDDLRTTRSEISELNRMIQRIQAEIEVLKNQRATLETAIAEAEERGEMALKD  
ARAKLALEAALQKAKDLARQLREYQELMNVK LALDIEIATYRKLEGEESRLESQMNL SIHTRTTG  
SGGFGGGFGSSFTGYTVP PALESAAVPKSRAIVIKKIE TRDGKLVSECADVLTN

>Alligator\_K80

MDTPSKAFSTSSLSGGASGRMSRASSIFAAVDCNGCSPGSTASRNFSSASLSGNRPSAYPPLSVDKTL  
LTPHLLDIDPSFQAMKNREKEEIKVLLNQFVALIKQVQSLELQNKMLTRWDFLKDQDSSSEVDIKCIY  
DEYMRMEQEMKSIDQEKEELESELTKVLDSDMDFRAKYE GEMQLRNSLEYTFLELKKDL DAGTLHRTEL  
EVKLNGLQEHMELKKSVEYQELQELLAEVKDISVVLGIDTRCNLDLHSIVEEVRQYEA LAVWSWKEAEA  
HIWSKLNQVPRSAMYG NHLFNSRREIADLN IQKLRSCIVSLKSQCLSEESIKEAGEQGEFALQDAS  
AKLASLEALQKQKEDVTHLVKEHQQLMNTKLALDVEILT YRKLVEGEESIESPAPT VITSIHSKPKSA  
ATSFSSAASKADPRGRGNPTEKMNLNRGTVEAVLSRSQSDGSASQNTPAQH DGARPKPRSLSNVEGHLE  
KPNQEK

>Alligator\_K7

MSR SVTFSSRSAMPGISQVRVSTVSSSRGVGGAGLGRVGSFGSSSLYNLGSRRSRESPIIRGSSYSVR  
SGYGGGLPAGFGSGLPSPGIQEV T INQNLLAPLNLEIDPTMQKVRQEEKEQIKTLNNKFASFIDKVR  
LEQQNKMLETKWLLQDQKTARSNIAPLFEAYISNLRRQLDGLMNDKGRLEGEELKMNQDLVEDFKNKYED  
EINRRTAAENEFVVLKDKVDGAYMKNVELEARVDAL TDEINFLRSLYEAELQELQTI S DTSVVL SMDNS  
RNL DLS IIAEVKAQYEDIANRSRAEAEAWYQSKFEVLQATAGKHGDDL RSTKNEIAETNRMIMRLQSEI  
DNVKNQRKLEAAIAEAEERGEMAIKDARAKQDELEAALQKAKQDMARQLREYQELMNVK LALDIEIATY  
RKLEGEESRLAGDRPKVSI SMVSSSGSGSGYAGGI GYSSFLGGAMGSGALSFGTGGSSFPVKAYS  
MTTSSSRTSIR

>Alligator\_K84L1

MSCRSYRVQNFSSSSAVLPRNMRPYSVSCQAGGVGYRGLSYFGRSRLSLSGAAPYKPRIAVGRCPPRLRYGY  
EYVLGHGYGNAGFSYRVGGVSGPCPIAPVTVNEQLLQPVKLEIDPTMQTVKFKQEKEQIKTLNKFASFI  
DKVRFLEQQNKVLETKWVFLQNOQRRNTIMPTLDAYICNLRKQLEALGCEGAQLEADLKAHEVMETNK  
KMYEEECSSRRTCANEFEVVLKKEVDCVFLNKAELAEARVESLKDIEIFLKSLEYEEIHMLHSHISDTSVIV  
QMDNSRNLDDGIITEVKAQYEDIASRSRAEAEAWYESKFEELRVTAGRHADNLRDRTKNEIAELTRIQR  
LRGEVGTAKDQRCKLEAAVAEAEQQGELAIKDARCKLTDLETALQQAKADLAHQLERYQELMNVKALDI  
EATYRKLLLEGEEYRLGAEACPVNISVCRSQGGGLICDPDPCIGGGYSATRSMRISGVSCGRGIYSTAM  
GPTVGDMSPCDPEDLMLFNIYHMRPIVNSVNHLL

>Alligator\_K84L2

MSCRSYRISSSGGGMRGFSSSSAVIPRNVKRYRVSTISCHGGGVGYRGLGYFGRSRLGGIASCKPRMAVG  
SCPPLRYGYGLGYGAASFGYGAGGFSGPCPIAPVTINEQLLHPLKLEFDPNLQSVKYQEKEQIKT  
LNNKFASFIKVRFLQNKVLETKWRFLEQQKRYKSNIEPMFEAYIYNLRRQLEVLGDRAKLETELSN  
MQETLEDFKYEESSTRACAEENEFVMLKDDVDCAYMNKAELAEAKVESLIEEITFLKNLHEEIAQLQA  
SISDTSVIVQMDNSRALDMDIIAEVKAQYEDIANRSRADAESWYYSKYEELRETAGHSDKLRNTKNEI  
MELSRVIQRLNGELENAKAQRGKLEAAIAEAEERGEMALKDAKCKLTDLEAALQKAKQDMACQLREYQEL  
MNVKALDIEIATYRKLLLEGEEYRLGGEGVCPVNI SVCRSQGGIVHDTNFCFGGGYTSSSRALFRSGGLV  
SSGGMCSSTAGKSIVTGAGXXXPADGYSAGSGWSSNVKFSSTTSYRAKY

>Alligator\_K5L4

MAQVIKNFSTSSAGIPVGRTSFSSISVSRGGSGGLRQIGGGFGRSRLHSLGGSKRISISGGYHSARSAYG  
YGLGGVYRIGGAGYFVGGGFPVPGSGGIQEVTVNQNLLTPLNLEIDPNIQVRKKEEKEQIKTLNKFASF  
IDKVRFLQNKVLETKWVFLQEHKTARSNIEPMFEAYISNLRRQVEVLGGERIRLDSSELKGMQDVVEF  
RIRYEDEIHKRTAAENEVVLKDDVDAAVMNKVELGAKVDGLTDEINFLRALYEAELAQMSQISETSVV  
LSMDNRRNLDDSIIEVKAQYEDIANRSRAEAEESWYQSKYEELQLTAGRHGDDLRNTKVEITEMSRMIH  
RLHSEIDSVKYEESSTRACAEENEFVMLKDDVDCAYMNKAELAEAKVESLIEEITFLKNLHEEIAQLQA  
SISDTSVIVQMDNSRALDMDIIAEVKAQYEDIANRSRADAESWYYSKYEELRETAGHSDKLRNTKNEI  
MELSRVIQRLNGELENAKAQRGKLEAAIAEAEERGEMALKDAKCKLTDLEAALQKAKQDMACQLREYQEL  
MNVKALDIEIATYRKLLLEGEEYRLGAEACPVNISVCRSQGGIVHDTNFCFGGGYTSSSRALFRSGGLV  
SSGGMCSSTAGKSIVTGAGXXXPADGYSAGSGWSSNVKFSSTTSYRAKY

>Alligator\_K5L3

MSRQSFVQIQSGRKGFSSNSAVIPSACRTSFSSRSVSQSGCGASGGFRRVGGGGGAGFGSRSLYNLGG  
CKRISIAAGSGGFGYAGPFYFGAGASSGFCYGGVGGGGGGVGGGLGLGGPGFGGGMGGPGFPVFPFG  
GIHEVTVNKNLLQPLHLIDPSIQRIRTEEKEQIQTLNKFASFIKVRFLQNKVLETKWMLLQEQGQ  
KTVRNNEIPLFEYIINLRQLNGLVDRGRLEGELEDNTQNLEEDFKNRYEETNRRHDAENDFVTLKKD  
VDGAFMNKVELQAKVDSLIDEINFLRAIYEAELSQMOTQITDTSVVLSDMNNRSLDMDSIIEVKAQYED  
IANRSRVEAESWYQVYEEELQATAGRHGDDLRNTKHEISEINRHIQRLRADIESVVKRQCASLQAAIAEAE  
ERGEMALKDARDKLAQLEDALQKAKADLARQLREYQELMNVKALDIEIATYRKLLLEGEEYRLGAEVNI  
ISVSSAVGTSYGGSGGLGLGGSGGLGIGGGSGFGLGGSGMCMVVGSGLSMGGGLGIGGGSGFSSSSGRG  
SCGLNVGGGSGSSVKIKTTSRRSYK

>Alligator\_K5L2

MTTRTSVRSSMGGGKGFSSSVGLGSGFGGGGGRASFSSVLSRVGGGRAGGFGGGAGGGFGRSRYMYNV  
GGSRKVSYGGGLRTGFGGGYFVGGAGMGGGFGGGGSLALGGGGGGAGFGMGGPGFGMGGPGFYGGGPG  
FGGRGGPGFPICPPGGIHEVTVNQNLLTPLKLEIDPEIQVRVSRQEREQIKTLNKFASFIKVRFLQNK  
VLETKWMLLQEQGQTVTRKTLPLFEAYINLRRQLDLSLGDGPRLDSELRNMQDLVDFKKNYEDEIN  
RRTAAENEVMLKDDVDNAYMNKVELQAKADSLADEINFLRALYDAELSQVHQVSDTSVILSDMNNRSL  
NLDISIISDVKAQYEDIANRSRAEAEESWYQSKYEELQVSAGRHGEDLRSTKMEITEINRMIQRLRNEIDNV  
KKQCANLQAAIAEAEERGEMALKDARAKLADLEALQKAKADLARQLREYQELMNVKALDIEIATYRKLL  
LEGEESRLAGEVGVAVSVVSSSTGMGYGGGSLGGGLGGGLGGLGGGGGGSGYGMGGGGSGYGMGGGG  
SYSMGGGFGMGGMGGRSATSMGGGGGYSGGGMGLSMGGFSGGSGRGLSSGGGSSSSMKIVSKTTSK  
TIR

>Alligator\_K5L1

MSRQSYSMRTGGGKGFSTGSAIITSGNRPSFSSASVGRAGGGGGFGRLLGGGAGGSGGFGTRSLYSLG  
GTRKISLGVGSNLRSGFAGAGGGLGFSGGGGVGFVGGAGGLFLSGGGGGGGYGGYGFVGGGLGFG  
GGPGGGGLVFGGGHSGRGPAGFGSGTPTGTIQEVTINHSLTPLNLEIDPNIQVRKKEEKEQIKTLN  
NKFASFIKVRFLQNKVLETKWVFLQNOQRRNTIMPTLDAYICNLRKQLEALGCEGAQLEADLKAHEVMETNK  
KMYEEECSSRRTCANEFEVVLKKEVDCVFLNKAELAEARVESLKDIEIFLKSLEYEEIHMLHSHISDTSVIV  
QMDNSRNLDDGIITEVKAQYEDIASRSRAEAEAWYESKFEELRVTAGRHADNLRDRTKNEIAELTRIQR  
LRGEVGTAKDQRCKLEAAVAEAEQQGELAIKDARCKLTDLETALQQAKADLAHQLERYQELMNVKALDI  
EATYRKLLLEGEEYRLGAEACPVNISVCRSQGGGLICDPDPCIGGGYSATRSMRISGVSCGRGIYSTAM  
GPTVGDMSPCDPEDLMLFNIYHMRPIVNSVNHLL

>Alligator\_HBS1

MSRQCFSSRGLFSSSAVCGFGRNGSSASVGSWSPGRGYGGFSSRSVCDLGRRTARISFGGGYPSRGYPSGV  
YGGFGIGRCGAYGGGAAYGGHMLGNVCFAGVSHGGFGGHRGAFAGFGGPCRSEGRGVNIHPELLKP  
LAVGLDPAECQVRTHEKEQIKNLNKFACFIKVRLLQNKVLTTKWDLQQCIVPGTRRNLEPLYESF  
ICNKKQLLEHLCDRDKLMCEEKAANHLVDEFKCKYEQINRRTAAENEVVLKDDVDCLHLTKEELEIR  
VALLRQLEFLTCIFAERAQMDQCDCDTSVIVEMDNNRGLDMDSIINSVKCCYEEIAHKSKEAEVAFYQ  
TRLEELHTNRGKCDLRLISQCEIADLKRGIQKLQGELEDGKVKQIGCLETAICDAEHHDGCTLKDAREKH  
INLQALQAKDKLACLRLDYQELLNKALDIEIATYRSLLLEGESRICTGTPACISVVGCGCTIGDNL  
AVGVGRGAARGEVVGSGGGVSMAGGGGFSSRSGECITRMGRLGSRIAVAGFGKGGPVPCGEVFMGAGG  
MGSMGNVVHDEVEHFPGGLGGMGGGACNAGMRASSTMHVMSSGTMPR

>Alligator\_HBS2

MSRPGRLTRSINRQRFSSASDVCGVERRGAYKASPCPPVGRCEVGDYSSNSACTLGGMRRLPHGTGYLS

EGYGAGGHRWAGYRGVDSGRFGSVSSRVDVCGHRGYGTVQGYGTGGYTACKRDGIQRCINKSLLTPLC  
MGVDPQEHQVRSQEKEQMKLNNQFACFIDKVQCLEQQNKALETKNWLLQOHTMPAARKTLEAYFENYIC  
KLKQLECLLGEERQSLNKECVAKKLVDFRCKYEEVINKRMTAEHGFVLAKKDQVDFLNTTEEQEVKVD  
LLKQCLELLNHVFTEERAQMDQCQLCDTSVMVKMDNRDLDMETI IKNVECCYKEIAQKSKEEVDTLYQTR  
FQELQEQRGRFCDLLESNKREIAQLTQLIQELQCELDNVKKQVGLQTDIRDABQHGDFTLQDGRAKHVE  
LQNALQKAKDELASMLRDYQELLNKALDIEIAMYKTLLGEESRICSGTPVTVAVVTSSCDIAEHFES  
AAGIGGPRRGLSSRSTGVQPRRRASSVVRPRVQEGVGCFFSAGLSSRSDFSSQSWGYQSRVASTAGGP  
FGSGGVACCCKGGFVPPKKGEVNSHIAVCQPGSTANFGPGGCVMRHLGSSP I VGEACPGVGGCDTGVVVKP

>Alligator\_HBS3

MSRQLFAGKSFYRPFKFTSASAVCGVGRHRHSGPSVCRPFGRGAGGYSSRSLQNLGGSKNIAACGGGYQS  
GVYGGFVVDYCMYGGWRCGDACYSNEGFGGVSFGGKLGCGPRGHGALGNYGGSCRSEGIYRVRVNEDE  
LQPLCVGVDPQEIQQIRAQEREQIKKLNQFACFIDKVRCLEQQNKVLTGKWNLLQEQVLPCKRNLQHLFE  
NYLCSLQRLDCLLSERQLEPELQNGQKLVLEELCKCKYEQEINRRTASENEFILLKDVDCSYMSKVELE  
AKVDTLRQEIIEFLRCVYAQELHLRDLRDNLDLDMETI IREIECWYEEIAQKSKEEVDAL  
YRTRFQELQETKGRYCNLDLKNHHEITELSRVVRQLQHNLDNAKKEVAQLQTSICETEQRGDCALKDAQG  
KYGELQNALQKAKDELASMLRDYQELLNKALDIEIAMYKTLLGEENRICTGSPVRWSPPLAMSSVIV  
GMEMALEQDVATPLYIKGAALDMEDKAQ

>Alligator\_k78LT

MSQLSPSCSKSGDGGKDFSSCSAHCOSVGVGSSSSSICQSGESRGRGYFYGYGSKSLHNLGGTRRISVC  
DGYQGGGRGYVGCWERYGGWYGRGGFGGGNGFGGGGARFGGICRGGVGGGLGGGDIGRSWGIQGVHVN  
NLLRPVHMEIDPDFQRVRAHEKEQIKSLNDKFACFIDKVRCLEQENQVLLTKWELLQQQGGQTVHRDIE  
PFFQSYICHLRQRDRTLQSQKEELNLEDCKMLQIVNEYKASYEKEIDRRLCTEIEFVNLKKNLDCIYMGK  
MEVGVKVNILREIEFLKCLYAMELSDVQRIADTNVVSMDNCRDLQVEGIIAEIRREYEGLAQKSQAE  
VNAVYQSKYQDLHNTWGRHCDRLRTRQHEIQELTRLIQKRLLDIGDVKKNAQLQEEIADVERRGCCAVS  
DAQETLRLELRCISLKLALHLDLDYQELLNKALDIEIATYRALLEGEECRIEGLPGPIPVINHGT  
WVSGSAGGRYGGFPWCWGGYGGFRGGHCGWGGGRNWGIVGGHCSIRRGFSRSRGGHYSRNIRCSPPNYGG  
SKGGGFSSRSEGNVVCISIRGGEPSFGGSCSGGVGGIFGMGGSCESGGGGHSGVGGSQAGGGGFISGGE  
CSFGDGRYGYGKSDCCVVGYSVGGVGHSGVAVSSKWDGGSSGCEGYSSGGTRFGRSRRGRSSGRNCCV  
GGYSSRRFTGTSGIQISSWTGGRAEGGECTARDGVSVGGSGSWSRGRDCCVIGGDGPGAGVSDGYSSGAG  
GYSSGVYGCYGGREYSGGAIISGEGSSGASVSCSTGYPYGPAGWDHAGGGGCVSGGGGYDSGVTVPIPI  
VGGSSSGVSGCGCGGYSGAGGSLSGERYSFGRGRYGCVSSISGGECSGGDASIGGGHSGSVGYISG  
ARGHSSVNISSDECSGCGSAGGAYSAGAGASSGMERCSSGSGGSSGGVVDICSGSVHSSRVVSSSSGAG  
GSSSGGGCSGGSGGTSSTNTPGAIGHCSGSSGSGGSGRFSGGYSGGGGSGRERYSSRIGGCAS  
STYSPGAGSSGGGLRSGGIGRTGSSGGIGPGYSGGAGGSFSGGGYSCSGGGYGSIRGSYSGGGY  
SGTGGYSGGAGSPGGRYSCSGGGYSSGAGGTSGGVCSGGGGYVSGSEYDSGAGLSSGDVCSSTSG  
GGYSGGGGGSGYDSGAGRLSCGDVVDTSGGYSGGGGGSGYDSGAGRLSSGDVCSISVGGYDSGVS  
GYSGSGAYDSGAGRLSCGDVCRISGGYSGGGGDSGEYSGGADDSGAGRLISGDVCRISGRYNSGA  
ERSEEYSSNGAYDSEAGRLSCGDVCSISGRSPGADGFCSDACSISGGYSGGGGGSGYSGSGEHD  
ETGRLSSGDVCSIGAGGYSGGGGGSGYSGRSRGGYSSGAVSSSVRVCSISGGYSSGAGSSSRGRS  
ISGGDDSGICGGGGYSGGAQGWG

>Alligator-k78L6

MFQQFSSRSGGGRSFVSRAAATVVPGGNRGSFSSASLSRIGRNVGLGGGGFGGGFSRSLHGLGGS  
GIPISFGGSIHGGGLGFGGGGFGGVPFGGGGFLGGGLGFGGGGVVPGRYGRWAGSVGGGLVGGGPGM  
FGGGLACPLPPPGIKVTVNPNLLAPLKLIDSEVQRVTRHEREQIKTLNNKFASFIDKVRFLQONK  
VLETKWDLQGTTRVVSLEPFMEAYINNLQCELENLNRGQLEGEELRNLDLQDVEDFKKKYEEEINRRT  
AIENEFVMSKADADHSFMNKVELQVKVDSLIDEISFLRAFFKAELDQMGGQITDTNVILQMDNRRDLN  
SIISEVKAQYEDIANRSRAEAEAWYQSKFQELQTTAMTHGDDLKTRNEISELTRIQRKAEIDNVKQ  
IAGLQTAIADAEQRGEMALKDARAKLSLQNALQTAKDELALHLLRDYQELMNVKALDIEIATYRTLLEG  
EEMSGEYVDPVSI SVVNSTTSLAGGGGGVGGFSLGGGRGSLGLGLGGGGGGGGGGYGGVGGIGLGLV  
GGGGSSFGHGIGSGSISVGGGGGNGVSVGGGSGFLGGGSSSIKYVSSSSSRKMVR

>Alligator\_k78L5

MALQLRTRKSIIGRSYSSSSVMAGGGGGNRVRSYSSSHGGGQCGGFSRSYGGGGRISSGSYGGGFG  
CRGGGFSGGMIGGGGGYGGMGCIIGGLGGMGGMGGIIGGMGGMGGMGGMGGMGGMGGMGGCFCG  
GGGFSGGPGMGMPIGGGPGMPVIGGGPMGGFGGGIIGGGFGGPRGDPGFPRIQPVQVDPSSLKPVQV  
EIDPQIQVKQNEKEQIKTLNNQFATFIDKVRFLQONKVLSTKWELLQQGHSGPRKDLSSLFESIQN  
LKRQLDSILHQREQLSDLNQMFHVEYKYYEIEINRRATAENEFVVLKDVNDNAYMNKQVLEAKVQA  
LMDEIDFLRHVFEELSOMHTISRDLVSVVSMNTRHLDMSIIDEVRRQYEDIARSSRAEAEAWYQSR  
EELQNTAGRHDNLRNTKQEIQELTRCIQRLRSEIENVKQVRAALQAAIAEAEDRGEMALKDARSKLQEL  
EAALQKDEELARLLKEYQELLNKIALDIEIAMYRKLLEGEERLSQDMSNVVSYK

>Alligator\_k78L4

MGGGIGGMGGMGGGGFSGGSGFGGGGFGGGMGPMIGGGPMGPMIGGGPMDGFGGGGGGPFPRGIQ  
PVQVNPSSLKPVQVEIDPQIQVKQNEKEQIKTLNNQFATFIDKVRFLQONKVLSTKWELLQQGHSGP  
SKDLSLEIYIQNLKRLDLSILDERGQLVSELQKMQGHLEDYKTYEIEINRRATAENEFVVLKDVNDN  
AYMSKVELEAKVQALTDEINFLRYVYEEEMSQMHTISRDLVSVVSMNTRHLDMSIIDEVRRQYEDIAR  
SSRAEAEAWYQSRYEELQNTAGRHDNLRNTKQEIQELTRCIQRLRSEIENVKQHQQLQAAIAEAENRG  
EMALKDARSKLQLEAALQKDEELARLLKEYQELLNKIALDIEIAMYRKLLEGEERLSQDLSNVV  
VGRRTITGHHGSGGGFSGGSGFGGGSGFGGGSGFGGGSGYGGGGCGIIGGGGIGGGGGMG  
GGYGGSCVSGGMISGGYSSGSRGFSGGGSIIGGSSSVRRSNTTTTTKSSGGRC

>Alligator\_k78L3

MALQSCTKSISGSKRGSYSSCSAIGGGGGSRVRSYSSYSSRSGYGGGRCGGFSSRSYGGGGGRISSG  
FYGGYGCRCVGGFGGAMGYGGAGGYGGGGSCIVGGLGGYGGMGGGFGGDFGGGGMGPVMSGFPVGGF  
GGGSRGFGGGFGGPGSGGPFPRGIQPVQVDPSSLQPVHVEIDPQIQVKQHEKEQIKTLNNKFATFIDK



RFLEQQNKVLSWKWELLQQQGHSGPRKDLSSLFENYIQNLRRQLDSIHGQRGQLESELQNMQNYVEDYKN  
KYEDEINRRTAAENEFVVLKDDVDCAYMTKVLEAKVQALIDEINFLRVVYEELSQMOTISRDLSSVVS  
MNSRHLMDSMIDEVRQYEDIARSSRAEAEAWYQSRYEELQTTAGRHGDNLNRNTKQEIQELTRCIQRL  
RSEIENVKQXXX

>Alligator\_k78L2

MALQTYTKSIGGRKCYSSRSVAVGGGGSRVRSYSSYSSRGYGGGRCGGFSRSYGGGGGGRISSGFY  
GGGYGCRGVGFGGGAMGYGGAGGYGGGGSCIVGGLGGYGGMGGFGGGFGGGFGGGFGGGMGFVPC  
FGGGGPGVGFPLGRGGPGYPGGIQQPVQVDPNLMRPVHVEIDPQIQQVKQHEKEQIKTLNNKFATFIDKV  
RFLEQQNKVLSWKWELLQQQGPSRRDLTALYENYIENLRRQLDNVLSQRGPLESQLEHDMQGYVEDYKN  
KYEEEINRRTSAENEFVVLKDDVDCAYMTKVLEAKVQALIDEINFLRVVFEELSQLEQTIISRDLSSVVS  
MNSRHLNLDSDIDEIRAQYEQIAQSSRAEAEAWYQSRYEELQSTAGQHGESLRNTRQEIQELTRCIQKL  
RSEIENVKQCEQLQAAIAEAEREGEMALKDARCKLELECALHKDKELARLLKEYQELLNKIALDIE  
IAMYRKLLEGEECRMSEGSNVNVSVVGRRTTISGGRGFGGGFGGGMGGGIGGGIGGGIGGGIGGGIGG  
PCGMGGPIGIGGPIGIGGFCGPGGAGMGGGCGIGGGIGSGSMVGGYGGSCIGGGMVSGGYSSSGSGR  
GFSCGGGSISSSASSIKCITTTTVKSSGGRY

>Alligator\_k78L1

MSRQSCGLNFAGGSRGSSSSICLGGGNKVSFSAASRGGCGSVRNPIGFGSRLYNLGGCKRISIGGF  
GNSGACGAFGAGGRGGGGFGYGGGLGGFGGGGGGGGGFSDGSGGMFNGWGGPSFPVCPGGIQQEVTVN  
QNLIPLEKLEIDPEIQKVSQEREQMKTLNDKFASFIDKVRFLQQNKVLETKWLLQEQGGTGPHSRS  
LDQLYEVYINSLRKQLDGLTSEKSQLQLELKNCEDLVEDFKTKYDEEINKRTAENDFVLLKDDVDAAYM  
NKVELQAKLDSLADELNLRVYDAELSQMQQTVSDTSVVLSDMNNRNLDLDSIAEVAQYEEIAQKSR  
AEAEAWYQCKYQELQVTAGKHGDSLKDTKAEISEMNRMIQRLRAEINVKKQENLQTSVADAEQRGELA  
LKDARVKLSELEAALQKAKTELTRQLRDYQELMNVKALDIEIATYRKLLEGEECRMSSGDCQSAVSV  
GSNSTSGSGGGGFGMGFGSGSGRIGCNLGGGAAFGGGLCSKHSSTGGFLKTLSELTLDFKCCSSGRS  
QKVLIFRRTI

>Alligator\_k8L

MSFFPTSKGQASYPSSFTYTSPTSTRITNPISSVMRKKDHGNLGSYKRFSWDDQAIVKINQNLDP  
ESGLDPTYHKEKLEKELKTLNQNQFVHLIERVCSLEQHKKVLETKCSILKSQKATPARMENLKYISQ  
LKKHLADQGMKGLHLLEHEIQDIMDENKQYEEEFNRNEKENDFLMKKEMDEAYISQNELEGKLD  
LRDELEFLKNFYDQEMHELQTEVHMYKESVVISMPSQPSLEVDIVSEAQSQYKMAERSCKEAEKAYRD  
RHNKLDKSMGRHGEELQTMKTEINDLTRKSHIQLEIQNLKEQCCKLEDIANADDRYKFPIEEAKNKLH  
MLENAIQKARQDMAHHLREYQELNLTGLDIEIATYRKLLEGEESRLESQGMQNLISHHKFFHHHGGVA  
LREISTLGSSSHPSGASPLESLSEERKPEVEN

>Alligator\_k8

MSVSGSRQSFKSSRYGAPRTFSRSRSTSNFTRASPPVASNARVDARGLRGPAMGLGAGGITAVSINQ  
LLAPLNLEIDPNMQQVRTQEKEQIKSLNKFASFIDKVRFLQQNVLETKWLLQGGQRTTRSNMTGMFE  
AYITNLRQLEGLDQDKLRLESELGNVQGLVEEFSKYEDEINHRTEKENEVFLKDDVDEAYMNVKVELE  
SRLEGLTDEISFLRQLYEEELHQLQSQVSNSTSVVLSMDNRSLDMSIADVRNQYEDIANQSRAEAE  
YKIKYEELRNTASKHGDDLRNTKAEISELTRTIQRMQAEIDAVKQRANLEAAIAEAEREGEMAVRDAR  
KLAELEAALQKAKQDMARQLREYQELMNVKALDIEIATYRKLLEGEESRLESQGMQNLISHHKFFHHHGGVA  
LGRAFGGYNISGYSLSLSSSIYSVNSPLESAAVTKSKAIVIKKIETRDGLVSESSDILSN

>Turtle\_k80

MTSRPNEFSSSSLSWQASWQNRGSSVVTSSSEYDGCSSPGGPASRSFSTSSLGGYTSSSCPSVFINKKL  
LTPRLRLDPTFQERKKQEKDEMKIINDQFASLIGKVQCLEQQNKVLTIRWSFLKDDQNSRSELDIKLLY  
DQYMSKQEMRAVHEREQLESELTEVLKSMDNIRSYEBEIHKRSGLLEFTFVLEKRDLDAGSMHRT  
EVLKQGLQELMELKKAQYEQLELLELAEIKDISIVMGIENKLDLRSRIVEVRAQYEAALFWSWEEAEA  
LTWSKLNEGATHSATYRDQFLSRRGRIAEELTIHQKLRTCIVSLKQCLRLEEDIKEAGNGQLALRNAN  
TKLAELEQALHKGADLVGLVKEYHELMNLIKALDVEILTIRKLVGEESSMESPTCPVSISSIHSSPRHF  
SSISSFGSSQLASRARGNSTDGMTRNGVVAEAVLARSQSGGSANRDADERPSGARPKHRLLSDEHCRE  
ESIPAE

>Turtle\_k7

MSRSVSFSSRSAAAPGFRQVRVSNVSTRGLGGGAGLGRAGGFGSSSISLGSANKRISLGGGSSSYGV  
QSGYGLGAGYGAGAGGGFAGAGIQEVTINPNLLVPLNVQIDPTLQTVRKEEKEQIKTLNNKFASFIDKVR  
FLEQQNKVLETKWLLQDQKTTNSNIAPMFEAYINNLRKQLDGLWLNKGRLEGELEKMNQDLVEDFRNKYE  
DEINKRTAAENEFVVLKDDVDCAYMNVKVELEAKVQALIDEINFLRSLYEAELRELQAQVSDTSVVLTM  
NRNLDMSIIAEVKAQYEDMAKKSMEAESWYQTKFETLQATAGKHGDELNRNTKTEITEITRMIHRLQAE  
IDNVKSQRAKLEAAIAEAEREGERAIKDAMAKQEELEAALNKAKQDMARQLREYQELMNVKALDIEIAT  
YRKLLEGEESRLAGDHAGNVSISVLNNSAGGGYSGAGGYGFGGGIGLGSQMGSGGLSFSGSGSPGGMKAY  
SLRTTSSRRSDRN

>Turtle\_k84L

MSCRYSRISGGGGVNRNFSSCSAVIPRSIRQYSFSTVSSRGGSGVYRGLGYFGSRSLSGVASSKPRMAV  
GSCRSARYGYGNAGLPYGYGGAGFYRVGGICGCPPTITPVQVPHLLQPLNLEIDPNVQSVYQEKQ  
IKCLNNKFASFIDKVRFLQQNKVLETKWFLREQKHQYQNNMPEMFEAYISNLKQLENLGCDRAKLETE  
LHMNDILEDYKRYEIEECNHRTECAENEFVVLKDDVDCAYMNVKVELEAKVQALIDEITFLRRIYEEIEAC  
LQASILDTSVIVQMDNRRGLNMDDIADVKAQYEDIANRSRAEAEESWYQCKYEEELKVTASKHCDNLHSTR  
NEITELNRVIRQLRHGELENVKAQRCKLEGAIAEAEREGEMALKDAKCLAELEAALTKAKQDLACQLREY  
QELMNVKALDIEIATYRKLLEGEESRLCGEGVCPVNI SVCRSQGGIVCDGDPFCFGSSSSSRTLLKTG  
GVLSSGGICDARIGRSIVANLGDVPCAPCVPTGGYSTSSGRSSNVKCVSTTSSYRTKY

>Turtle\_k5L4

MAQKTIISRSGGATRNFSASSAIIPGSRFSFSSISVSRGGGGGLGRVCGGGFGRSFRHGLGGSKRISVSG  
GYRAVRSYGYGLYGGAGYRIGGAGYFGGGFAGGAGIHEVTVNQNLAPLNLEIDHTIQKVRKEEKE  
QIKTLNKFASFIDKVRFLQQNKVLETKWCLLQEQKTAKSNIPEMFEAYINNLRRLQLEALGGERLRLDG  
ELKNMQDTVEDFRIRYEDENKRTAAENEFVVLKDKVDIAYMNVKVELEAKVDALTDENVFLRALYEAELA  
HLQSQISDTSVVLSDMNSRNLDDLGGIIAEVKAQYEDIANRSRAEAESWYQTKYEELQLTAGRHGDDLNT  
KIEISEMNRMIQRLRSEIDNVKQCASLQTAIADAEQRGELALKDAQAKLAELEALQKAKADMARQLRE  
YQELMNVKLALDIEIATYRKLLEGEESRLAGEVGVAVNISVVTSSAGSSYGTGGMGGLVGLGNASGLGY  
GIGSSFSASSGRGLVGGFSTGGSSSSMKIVSKTTSTKKSIRS

>Turtle\_K5L3

MSRQSTIRFQSRKQGFSSASSAIIPNSCRTSYSSRSVSRAGCGAGAGRVVGGGSCFGSRSLYNLGGSK  
RISMAGSSGGFLCGAPGVPVGFAGGAGCGFGGGGAGAGYGLAGPFGGGRVGPGFPVCPGGIQEVTINQ  
SLTPLNLEIDPTIQRVKKEEKEQIKTLNNQFASFIDKVRFLQQRNVLETKWCLLQEQKTKVNNIEP  
FFENYIGNLRRQLNLMNERGRLEGEVNNMQNVVDFKNRYEDEINKRTTAENDFVTLKDKVDSDAYMNV  
ELVAKVDSLTDIEINFLRALYEELELAQMOTQVSNVSVLSDMNNRDLDDLGGIIAEVKAQYEEIANRSRAEA  
ESWYQTKYEELQVTAGRHGDDLNTKHEISELTRIVQRLRNEIDNVKQCANLQAAIAEAERELALKD  
AQGKLALELDALQKAKGLARQLREYQELMNVKLALDIEIATYRKLLEGEESRLCGEGVAVNISVVSST  
VGGYGSRSGLMGSGSGVCIGGGSGLGMGGSGVCVGGGSLGMGGGLCVGGSNFSSGSGRSIGGLSLG  
GGSSSVKFSVTSSTKRSYKS

>Turtle\_K5L2

MSRISMRKSTSGGGSKTFSSGSAGLGGGFGGGGGGRSSFSVSVSRVGGGRAGGFGGGGFGSRSLSL  
GNKRVSYSTGGGGLRSGFGGGGFGGGGSAIFGYGGGAGGGFALGGGGYGLGGAGGGYGLGGPGFGG  
RGGPGFPVCPGGIHEVTVNQSLAPLHLDDIDPEVQKVKVQEREQIKTLNKFASFIDKVRFLQQRNV  
ETKWTLLQEQGQTVKRSLEPLFDAYINNLRQLDNLGERGRLDSELRNMQDMVEDFKNKYEDEINRRT  
AAENDFVVLKDKVDGSYMNAELQAKADALADEINFLRALYEAELSQMQQVSDTSVVLSDMNNRSLDLD  
SIIREVKAQYEEIANRSRAEAESWYQTKFEELQISVGRHGGDDLTKVIEINRMIHRLREIDNVKQ  
CASLQAAIAEAERELALKDARAKLAELELDALQKAKADLARQLREYQELMNVKLALDIEIATYRKLLE  
EESRLAGEVGVVISVVSSTGYSGGSLGGYGGGLSLGGGGGGGYSLGMGGSGFLGGGGGGGGG  
GYGYGSGMSIGGSGFSGSGRGLSGLSSGGRSVSVKIVSKTTSTKKSIRS

>Turtle\_K5L1

MSWQSGSIRSGGSGKGFSTVSAVVPSSHRASFSSVSVSRGSGGFRSLSGGSGFGRSRSLYNLGGTKKISIG  
GGSNLRSGFVGGAGGGFYLGGGHGGGSSFGGGAGGGGLSIGGAAGSGFGFGGSGLGFGGGGFGGGRS  
PAGFGGTLPGMGTIQEVTVNQSLAPLNLEIDPNIQQVRKEEKEQIKSLNKFASFIDKRFLEQQRNV  
ETKWTLLQEQGQKSNKNNLEPLFESYINNLRQLNHLNLRGRMEGELKNTQDLVEDFKNKYEDEINR  
RTAAENEFVVLKDKVDAAAYMNKIDLEAKVDALMDEINFLRRTLYDAELAQLNVQVSDTSVILSDMNNRDL  
LSSIVNEVKAQYEDIANRSRAEAESWYQNKFEELRATAGKHGDDLNTKGEISELNRLTQRLRAEINAR  
NQCASLQTAIADSEDRGELALKDARMKVADLELDALQKAKQDMTRQLREYQELMNVKLALDIEIATYRKL  
EGEESRLSSEGVIPVSYVVSAGVGGAGLGGGGFGGFSAGGGGGFGYGGGSLGLGGGGFGFGSGG  
FGGGSSFGYGGGSLAGGNGFSTGSGKGTGVTSVGVKIVSKTSSSKTIKS

>Turtle\_HBS1

MNRLCFSSGSLGRRCFSSASAVCGLSGGRTSSGVSVPAGRSESGFGSTSLFELGRSQRISYGGGYGL  
GHCAYGGGGYCGAGYSSGAGFGSHFVVGSGAGYGSVCVYGGGGRGSSGFGGYSPIYHFGSGVRYGVGH  
AGRSDGIQAVCIHPELLKPLSVGVDPEEHKIRSHKEKEQIKCLNDQFACFIDKVRCLEQQRNVLATKWDLL  
QQHAVPAKRDLPLVFENYICQLKKQLECLLHADRLEDEEKAVQDLVHEYKSYEBEINKRTHAENEFV  
LKKDVCVFMTEKELEARLLQLRQHFEFLKCFIEERAQLDQGLCDTAVVLEMDNSRDLDSLGIHNSVK  
CYEIAQKSKGEAETFYQTRLEELSTNRGRFCDDLKNIQGEIAELKRLIHKLQGETDKVKKEIACLQTAI  
ADAEQRGDCALKDAREKHIDLQNALQKAKDKLACMLRDYHELNIKLALDIEIATYRMTLEGEETRICTG  
NPTNVAVVSGGHTIGDCRAGFGSVCCPLKGGFNHIGIFASSDGFSSRSAEGISRMGGGYGTRSAVSSG  
RGYSSGSLSGGYSGLGSGGSGGYSYRRVLSDDFSSAGVGGVGGVGGSSGAGAGGDVGYHSSGGV  
SSVGGVCSGSDVASSGDVAVSSGGASGIIHSSVEHFSSGGVSSGGGVYSSGGVSSGGVYSSGGVSSG  
GGVYSSGGGSGGAYSSGTRMVSVSSSRRIIR

>Turtle\_HBS2

MNRQTFASSTVGRKGFSSSTSDVLSGHRTCVASVGPVVERCKVGGYSSRVCHLGGSTRIADVVGCPGSA  
GCYGGYGDGTAWSVYSSGGFSGRVGLCGPRGYGTFGGYADCRSDGIRGVSVNESLLKPLCVGVDPO  
EHQAREHEREQMKTLNNOFACFIDKVRHLEQQRNVLETKWLLQCVPPAPQKNLEQCENYICSLRKQL  
EDLLSDKEQLTCEESASRKLVDDEFKCKYEEIISRTAAETEFVVLKKEADGTLHKEELEVNNTLSKQKL  
EFLRCVFDEERAQMDGQFCDTAVIVKMDNSRDLDTDCIKNVEGWYKEIAQRSKEEVDVLYQTRFEELQD  
QRGRFCEDLERNKHEIAELTRLIQKLQGETDHVKKQIACLQTAICDAEQRGDCALKDARGKHMLQNALQ  
RAKDELACMLRDYQALLNVKLALDIEITTYKLLLEGEESRICLGTFSVSVVTNSNIAGDSGTVVVGS  
CGYSGLSRGSYSSGHRCGSPGGFSSKSLGVCPRSVSVAGSQKFPPEGADFPYPPGGFSRSRSGCISRGV  
VSSVCSHHLPGGVHWCPPGGVSVGGGYGSKVVTSSVGTQVSGGVACSPDGGGYITSSGYPNGVCTVE  
TGGFIIQYLGSSPAGPSTGAVDNSAGPCHTGVPGSCEVVRETGIAL

>Turtle\_K78L4

MNRKFSKSGSGARGFSGRSATTTITSSGNRAGFSSASLSRVGRRSGGYSGGFGSRSLSLGGNKSTSI  
IGGGGFRSLGLFGGGGGFGGGGFGGAGCGGGFGGSSGAGPVLSPGGIQQVTVNPNLLAPLNLEIDPEVQ  
RVKQEREQIKTLNKFASFIDKVRFLQQRNVLETKWLLQEQGTTITKIPIDPLFEAYINNLRRLDLS  
LVDRGRDLDELRNMQDLVEDFRKKFEEIHRRTSAENEFVVLKKEVDAAAYMKMELQAKVDSLIDEINL  
LRAVYEAELAQMGGQIKDTNVIQLMDNNRDLNLNIIAEVKAQYEDIANRSRAEAESWYQSRYQELQVTA  
TTHGEDLKVTRNEISEVSRVIRLKAEDISVKKQIAGLQTAIADAEQRGELALKDARGKLADLQNALQTA  
KDELARLLRDYQELMNVKLSLDIEIATYRKLLEGEESRMSGEYADPVISVVSSTTVAGSGGGVGSYV  
LGGGGGRGSLSLGGGGGLGIGSGSGFGIGGKSGISVGGSGIGLGGSSFGYGGGVTSSGGSSSIK  
YVSTSSSSSKLIR

>Turtle\_K78L3

MSRQLNARAGGCSRFSGSVSAIISNGGRSSCTSLSRGRSRHCVFSGRSRLYNLGGIKSVSNLIGGGWRLG  
GGFGGGTSGGAGGGGGGLFSGGVGGRRSSPGFISICPPGGIQEVTINQNLVPLNLEIDPEIQKVRVQ  
EREQIKTLNNKFASFIDKVRFLQONKVLTKWNLQQQPTSNAGNNLEPAFEAYVGLRKHLDLSLVGER  
GRQDSELKNMQDLVEDLKHKYEIEINRRMAAENEFVLLKDKDLDAAYMKKLEMEAKVAAMTDEINFLRALY  
ETELAQMQRQISDTSVILSMDNRRALDLGIIAEVKAHYEDMANRSRAEANSMYQKGFQELQVTAGKHND  
DLKNSKLEISELTRLIHRLQAELENVKKQCAKLQSAVAETEGRGELTLKDAREKLEVELEMALQKAKEETA  
RLLRDYQELLNLIKALDIEIATYKTLLEGEECRMSGECASAVNISVSSSSGGGSGISWGGGGGGGLSVG  
GGSSSSGGRGIGGYSYGGRRGSSCVKIIISTTSSSKRTTIC

>Turtle\_K78L2

MYLQPCPTPSAGGSRSSYSSCSAIGAGGGGGRRVSSYSSYSSRFGGGGRCAGFGSRLHGVGGGARISY  
GGFGGCRGGGFGGGYGGGAGGYGGGAGGFGGGPCGFGGGAGGFGGGAGGFGGGAGGFGGGMGFGGPGFPG  
FGFPGRPGQPGGIQPVHVDPSLLQFPVNVIEDPHIQQVKTQEKEQIKVLLNQFAVFIKVRFLQONKVLV  
TKWNLQQQGGTIKKDLAPLFENFIQSLRRRLDGLQNKQGLQSELENMQQYVEEYKHKYEDEINKRTA  
AENEFVLLKDKVDNAYMVKVELETRVQGLTDEINFLRFIFEEELSQLQTI SRDLSVVVSMNRRHLDLDG  
IIQEVNRQYIEIAQRRAEAEAWYQSRYEELQSTAGRHDNLRNTKTEIQELTRS IQRMRAEIESVKKQI  
ANLQSAIAEAEKELALDARAKLDLLEHALQKDKADLANLLKEYQDLLNVKLALDIEIAMYRKLLEGE  
ESRIAGGGHVVNSVIGGGGGSGVIGGGFGGSGGGICGGFGGGNIGFGGGSGGGICGGGFGGGGSGG  
SGVVVCGGGYGGRTVGGGGFSSGSRGYGGGGSGICSSGGSSVTRRCTTSFSTKSGSGGY

>Turtle\_K78L1

MSRQFSGQSLGSSIRGFSSSSACFGGGNKVSFSTVSRGGCAGSACSPRFGSRLHNLGKNKRISIGGGF  
GTCGGFGSGGQAGGGFGGGAGSGGGQFSGGLGGCFGGGAGGFGGGWDGPGFPVCPGGIQEVTINQNLIT  
PLNLKIDPEIQKVRKEEREQMKTLNNKFVSVFIKVRFLQONKVLTKWNLQQQGGPKKSLDQLFEA  
YSNGLRKLQDGLLNERRQLDTERKFNQDLVEDFKHKYEEEEINKRTVVENDFVVLKRDLDVAVMSKVELQV  
KLDLSTDEINFLRCLYEAELSMQQTASDTSVLSMDNRRALDLGSI IREVKAQYEEIAQRRAEAEASCY  
QCKFEELQVTAGKHGDSLRDSKSEISELNRMIQRLQAEIENVKQCCERLQTSIADAEQQGELVLKDAKGL  
LAELEGALQKAKADLARQLREYQELMNVKLALDIEIATYRKLLEGEECRMSGECQSAVSI SMAGGSSSTG  
GGLGGGIYLGGGGGSGRIGFSSGSGRGGYALGGGVSVGGGY SAGKGGYSGGGSSSTIAKTTVTSTSVKS  
TSRRV

>Turtle\_K8L

MSVIVNKKYRSPHNFSQSYAFTGHSRTSPVYAISSPGGSKFRGARSPLGLGMSGGVIEGTAAVN  
FNRSLSMSPIGIGLDPEIQRVKAEKEEQIKTLNNKFAHFINKVRTLEQENQVLTKWNLQOQKTPSNME  
KMLKAYINSLQKQLEDLQQRVLESQGNMQDLVEEFKRYEEDENNRSERENQFVLTKKDVEAYIKK  
QELVVKLQSLTDEINFLMELYAKELRELQADVEMSNPVVIVSVDSSPKLDVDSIIAEARVQYKMAENSR  
EEAENKYRITYEQIQEKAGQHGEELRAAKAEINELNMIQRIRAEIAALKEQNAKLEANIVQAEEQKLA  
VADATGKLOKMEHALQKAKEDMVMVQLREYQALMNLKALDIEIATYRKLLEGEESRLDSSMQNLSILTKT  
TGYSGMSTRFPKGFSS

>Turtle\_K8

MSLRITQKNYRSTSSVPTRAFSSRSFTSGPATSTRMSSSYSSYGGSRYGGSIRGSPMGYGLGAGGGITA  
VSVNPNLLAPLNLEIDPTLQHVRTQEKEQIKTLNNKFASFIDKVRFLQONKMLETKWDLQOQKTRSN  
MNLFEAYINNLRQLDGLGQEKLEAELGNMQGLVEDFKNKYEDEINHRTKENEVLLKKDVEAYM  
NKVELESRLSLELTDEINFLRQLYDEELRELQSQVSDTSVVLTMNRRKLDLDGIIAEVRAQYEEANRSR  
AEAENMYKTYEIEIQA VAGKHGDDLRSKTIEINELNMIHRLQSEIDALKGQRASLEAAITEAEERGEMA  
IKDASAKLAELEGALQRAKQDMARQLREYQELMNVKLALDIEIATYRKLLEGEESRLDSSMQNLSIQTKT  
TGYSGLGSAYGGYGGYSSYAGGSYLSKPTLESSPLSRSKAIVIKKIETRDGRMVSETSDVLSN

>Lizard\_K80

MTSRSRDFSRSLSSRSLTSPGASYNVRRGRSCSPSSRYGACCNPTREGEARRNFSSSLTYGHAYPKVT  
INQRLTPLHLEIDPAFQAIRNKEKEEIKTLNNQFASLIGKVQNLQHNQVLLTRWNFLREQDNLSDLD  
IKLLYDQYMNRLRLEIRSIDNEKEQLDAELDEVLADMDNVRNSYEEEINKRTGMEFTTALKKDLNDFL  
HKTELEAKLSGLHAWVELMKNIQEQLELEVMSQVKDVSVVLGIDNRRNPDPHRIVEDVRAQYEAALAIRS  
WEELEALTRSKLNEREVLRSVKYQDHLHRRRAIAELNIIQKMRSCILSLKSLQCLREDNIIKDVGLQGET  
ALNDAKAKLAKLEALHNAKQDLAQLVKYQELMNIKLALDIEILTYRKLMEGEEISMESPPPAVISRIY  
STPKLSSPNFCTTSSYLATRAREDSPPDKMSHSRTSLQSGLSRSQSGGTGVVSGDDLKSHSSRSAGTAD  
GSLRSRSHSSMSSSVSEAFRSTSHRGTLSESGSSRGTSNKSGNFADIEDTTESSVSRSHSHGSGSHRTHSNK  
SGDNPEDRPMSPSGNRGISESCLSRSQSNRSGGLTDSVVFARTDSDGAEQESNYSRSQSHRSVGLSP  
SGFSRIQSEESNIVSGTTHVGDLSGNSNVPKGNASRSQSSRSRDKSDSSLSRIHSGGSEAISEGSFLGS  
NSGSSTSYVEGGLSRSQSEKDFHVSHGSDSYVPAASKTRNAEEAGVLVDDISRNQSGTSTDISGGLS  
RSQSDENEIHGSEDYAETVSRSRSAEDGGVPVGGISRHCQGISRDMSTERHLSRSQSDKNKFRANRSSG  
SYTDSVVSQARSAEDGGVPVGGISRSDRSVEGSLRCSQSGENKFCGTEPVSASSTEGVSRISHSSGSRG  
ASQSSFRTPSIRSADLTDVFMRTSSNAEQEIQEPRSRISHAARESSSESSFRSQSNRSRNFVAESVLA  
RTHSGRSEGLSKSPNDSSQGFVEATAPRSHSHGSGGFAKLSVSTTSNKSRRVSESALSRSPSAGSKDI  
SEDSLRSQSSRSRGGFLRGNSSKESDSNVSGRYVDEKSHREADVLKSCISRSRGTAGRVSRMQSDES  
EGPVETSTPISLHKNRNEGTMEHSLRSHSEDSSEFKATGVSRASEISKVAESEVSPRSSSKDNESSEPE  
LLSRNYSYRCAVESHPICISRTESDI SEAGGTISDAGLSTSYSSSSGEASINNPVYSYSEEQEGNCQYEDV  
SHLHTATDEDVLESVETGDLAKGQSGETATPKPVCMVYEFSSDEDDHPPSGELCYVETSME

>Lizard\_K7

MSQLSYSSRSAAGPAGFSQVRVSSVSSSRGIGGGSSFRKPGGFGSSSLYNLGGSSKRIISLGGVGGGGSSF  
SVRSSYGGGGLSAYGGYGGPLSPGIQEVINTNLLSPLNLEIDPTIQKVRKEEQIKTLNNKFAS  
FIDKVRFLQONKMLETKYSLLEQKTKSNLAPIFETYSNLRRLDLSLMDKGRLEGLRNMQDLVED  
FKSKYEDEINKRTAENDFVVLKDDVDASYMKNVLESKVDGLTDEVNFLREFYEAELRELHNQISDTSV  
VLQMDNRRNLDDLSIIAEVKAQYEEIANKSRAEAEAFYQTKYEAALQVTAGKHGDDLNRNTKTEISDLNRTI  
QRMQAEIENIKNRGKLEAAITEAEERGELAVKDARAKLQELLENALNKAQEMARQLREYQELMNVKMSL

DIEIATYRKLEGEESRLAGDAGSVSMVTLNNTGSSAYGSGSYGSGSYGSGSYGYGIGIGSGMGSR  
SVGFSSGGGGQGSIKTTYSVSSSTSQRSVRN

>Lizard\_K84L1

MSFHSPACGPRNFSSCSAVLQHPGNTSRISDSCSSRISGISCGGAGCFGTRSLGGIGSCGPRIAIGNCP  
PPRCRYSCCGAGYGCYGHSGICMPCSPNITRVTCNQDLEPLNLGIDTTAQATKQEKNEQLCLNSKFA  
SFIDKVFLEQQNLMLKTKWDFLQERKCKSNMPEPMFKEYIANLKKKEQECMECERAQLQAEMKNWREALE  
VNKKKFEEECHRRTCTENEYVSIKKEVDCVFMKSEKEAKVQALMKDLFFYKPTFYQEIHELQSCISDTC  
VTVQMDNSRGLNMDVMEVYRRQFEEISSRSRAEAEAWCRCQYQELKTTAAKHCDNLRHVKEELSEITRV  
VHRLSEVSNVKAQCTKLEEEVAAAEEERGGIAVKDARCKLVELEDALHKAQDMACQLEQYQDLMMKMG  
LDIEITTYKLLDGEELRMDGDCAVNI SVRRSQGAVVGGSDPRPPCGPHVLCGPNKRTGSCDDY

>Lizard\_K84L2

MSSPPSPAKRPSNFTSCSALIPSTESRNYFGFPSTSKGYSSGFKGAGYFSSQSLSGSSSHGPKITGASCH  
PAIYGYGHRGIGAGYGSAGCSYSLYGPGFNQAGIGTSGTTPAIPVICNMTLQPLNLEINSAQAVK  
CQEKNEQLCLNSKFAFCIDKVRFLQHNLMKTKWDFLKEKKCKSNMDPMFHEYISRLRKELERLQWER  
NQLQVEVNNWRDTEMEGNKKYEEYNNRASAENEYVTLKKEVDYIFMEKSEKEAKVETLMQDIFFYKTF  
EEEICEMQSSISDTCVTVKMDNSRDLVACIEEFRCRYEDIASRSRAEAEAWCQCQYQELKTTAAKHS  
NLRNFKDELEELTRTVNRLQAEIANVKAQRCKLEEEVAGAEERGMVDAKCKLFDLEDALHKAQDMA  
CQLEQYQELMHLKALDIEIATYRKLEGEERINDGECAVNISVQRSQGAVVCSNDLIGGPKRGGSIMM  
NGRDTCNPAGYKQSLSSCGAPCAVQSPGGDMCNPPPPQPHGKSGKGNVNVGATPAPCASRG

>Lizard\_K84L3

MNTGGAGAPGQSRITSVTCNESLLKPLDLGIDTEALAEKSETKNEQLSLSKSLASFINKVQLLEQHNLM  
KTKWDFVQEMKQHRSDMEPLFDDHTSRLKKELECLEREKEMQIEHDSQAQTLKKNKRYEEELNKRATA  
ENGFVLLKDLDFAFADKAELEAKVEKLAKHISFLKHIYAQIESELQNCISSETCVMVQLDNRRALDMNRT  
IEEFRRQHEYIASRTRAEEAWLQHQYQELKTTAAKNNDLNVAKKEIQALTRTRAHLESQWITSIKTQRC  
RLEDEVVEAKEHGETAVKDARCKLSDLEEARLAKAKQDMTCQLEQYQSLMNVKMMAMNIEIATYRKLEGE  
CWLNRGDRAVNICVQRSEGAIVSGGNFHHGSGRTPCETKTSKKDVHSDKATPGSSVTAKSSPGDAGGS  
GDVGGSSSSSPVPH

>Lizard\_K84L4

MSCRSYHVSSRGGVVRNYSSSAVFPNRVKNYSAVSTISYKGGSGFGAKGLGFGSKSLCGVASCRPRIA  
LGTYQPVKYGNLGPASLGYGMPFSGNRFGGVSQPRPAGIAPVTVNPHLLQPLHLIDPSVQMVKQQE  
KEQLKTLNKKFASFIDKVRFLQHNLMKTKWDFLQEQKRVKSNIEPLFDGLIHKLKKQLESGLGCDRNL  
ESDLTSSRDILEYRKRKYEDECNRRTSAENEFVTLKDKVDVCIYMHKADLEGKVESLVEEVNFRCLHDME  
LQELHSCISDTSVIVQMDNSRDLVACIEAEVKAQYEDIANKSRYEAEASWYQCKYEEMRATAGKHNHDLR  
DTKNEIMELNRIQRLKAEIDTAKGQRSKLEAAVAEAEERGMALKDAKCKLTELEDALIKAKADMARQL  
REYQELMNVKLALDIEIATYRKLEGEENRLYADSCPVNISVCRTOGGLVCDPDCIPGGYASSSRNFVR  
SGGIQVTSGGGMCSPGLGRNLSAASCIDLGSPLTGGYSTGSAKSSNVKVFVSTSTSFRTKY

>Lizard\_K5L4

MAQKSVRVTKNFSASSAVMPGSRGTFSTVSVSRGGGAGLGHVGGFGRSLHGFGGSKRISMGGYRTARS  
GYGYGLGHGGVYRIVGGSGYGVGAGGIEHEVTVNQNLAPLNLEIDPTIQRVRKEEKEQIKTLNKKFASF  
IDKVRFLQHNLMKTKWDFLQEQKRVKSNIEPLFDGLIHKLKKQLESGLGCDRNL  
RIRYEDENKRTAAENEFVTLKDKVDVDAAFMKNVELEARVDSINDEATFLKSFYDAELAQMHAQVSDTSV  
LQMDNSRNLDDLDSIAEVAQYEDIANRSRAEAEASWYQSKYEELQLSAGRHDLDLHNTKIEISELNRMIQ  
RLHSEIDNVKKQACAGLQASIAEAEQRGELALDKARNKLAGLEALTKARADMARQLREYQELMNVKLALD  
IEIATYRKLEGEESRLAGEVAVNISVHVSSGGMSYGGSSAMGLAGGAGLGYGGGLSMGGTSSISSA  
SGRGLAGSIGSGRSSSMKIVSKTSTTRKSYQS

>Lizard\_K5L3

MSHQATVKIQKGFSSNSAILPSTSRFSRSTVSRGGSCSAGGAGFRVGGGAGFGSRSLYNFGGSKRI  
SGFGGVSGAGYCASIGGGYGLGGSSYGLGGGIGSGFVIGTGFGGPGFPVCPGGIQTINQHLLTPL  
NLEIDPTIQKVRKEEREQIKTLNKKFASFIDKVRFLQHNLMKTKWDFLQEQKRVKSNIEPLFEMYI  
NDLRKLNLNLEDRGELNLELNIQNLVEDCKNKYEDENKRAEAEAEVTLKDKVDVDAAYLNKVELESKA  
DSLNCVNFRLALYEEELAQMHQIISDTSVVLSDMNNRNLDMDSIAEVAQYEDIANKSRAESETFYQC  
KYEELQTAAGRHDLDLNRNKQEI SEINRHIHRLRAEIDNVKKQCANLQAAIAEAEERGELALDKARQKLA  
ELEDALQKAKQDMARQLKEYQDLMNVKLALDIEIATYRKLEGEERLASDASGAVNISVSSVTSRGGGA  
AGCGIYGGGSSLSLGGGSGFVGGGGGIGSGHGIGGGSYSSASGRGIGGGMSLGGGSSSVKSVKYV  
TSQKSYRS

>Lizard\_K5L2

MSRISYRÄSTGGGSRGFTSGSAIVGGGGGGGGGRSSFSYSVSRVGGGGRAGGGGGYGLGGGFGSRSLYN  
IGGNKRISYSTIGGGYRSGFGGGGGFGAGGGGYGAGGGGYGAGGGAGGFGVGLGGGGGLGFGGPGYG  
GPGAGFVVGPGFSGRGGPGFPVCPGGIQTINQHLLQPLKLEIDPEIQRVRTNEREQIKTLNKKFASF  
FIDKVRFLQHNLMKTKWDFLQEQKRVKSNIEPLFEMYI  
EDYKNYEDENKRTGSENEFVTLKDKVDVDAAYLNKVELESKA  
SVVLSMDNRRCLDLNLSIAEVAQYEDIAQRSTRTEAESWYQTYEELQVSAGRHDLDLNRNKTEISELNR  
MIQRLRSEIDSFKKQCANLQAAIAEAEERGMALKDAKHKLSLEEAALQRTKQDLARQLKEYQELMNVKL  
ALDIEIATYKLLLEGEEIRLAEGVGNVGYTVVSSSTSTGYGGGSLALGGGGGGHFGGGGFGGGGGGGY  
GGSGYGLGGGSSYSIGGGSGFVGGGGGIGSGHGIGGGSYSSASGRGIGGGMSLGGGSSSVKIVSKTSTTKM  
AY

>Lizard\_K5L1

MSRQSYSTRAGSGGGSAGKGFSTASAIIPSNRSGFSSLSLARAGGGGGLGGGGLGRITIGSGGGGGGGF  
GSRSLYGLGGAKRISVSRSSNLRSGFGAGGGGGGFGSGSGSAFAGFGAIAAGSGFGFGGGGGGGGGGGY  
FGGGGLGAARSSLGFGGGVIPGGGTIQEVTINQSLAPLNLEIDPAIQEVRKEEKEQIKTLNKKFASFIDK

VRFLEQQNKVLETWKVTLTLDQDQFKTGANKGNLDPLEAFYINNLRKQNLNGLINEKGRDLGELRNMQDIVED  
FKTKYEEEEINRRTSAENEFVMLKKDVAAYMNKVELEAKVDSLTDLNFRLALYEAELAQQAQMSDQAV  
ILSMDNRRDLDLNGIVSEVKAQYEDIANRSRAEAEAWYQTKFEELQATAGRHGDDLNRKGEISELNRLI  
QRIRAEIENARNQCANMQTAIADAEDRGELALKDARAKLIELEALQKAKEEMTRLLREYQELMNVKLAL  
DIEIATYRKLLLEGESRLEFEGEYVNPVSI SVVST SAGGGGGGGGLGGGLGGGLGGLGGLGGGGFGLGSG  
LSFGGGGGSLGSLGSLFGYGGGGGGGLGFGGGGFSSGSGKIGAGSSGVKIIISKTSTSQKSIKS

>Lizard\_HBS1

MTDQEQPYNCSHRMRGFSSASSTGVTYKPPVCPYVATGRSGEGNSSRSFHNFGQAHRI SNGRYRGGGIR  
EIIYINKQLLEPLYLGVDPHDHQVKADEKEQIKDLNNQFACFIDKVRYLEERNQALATKWEKLSQNPVAK  
KDLSPLEENYIITSMRRKLDNLCEKNQLQOEHTMLDLLEANRCKYEEVKKRRTNAENEFIVLKQDQVGI  
FKKQKELEQKKEVLEENIGFLTNTFFSKERATLESQNLNNTSVVVNMDNSRCLDMDGLIQEIESWYQGVVQK  
SKGEANLFYWNQMEDLQSKRSQFYEKLRQNNADIAELNRYVQIMRCQVTEKQKVASLHAALRETKELGD  
HALQDAESKYKDLQNRVQTSKDRLVLRDYLQDLMTKLALDIEIATYKTLLEGEEQRI SAGVPVNVAMV  
NATCALHNPARHLKP

>Lizard\_HBS2

MNICGGPQCFTRRNFFSSASVIGGLGGSQGRYIPVQCQPPGRCGAGGYSSRSLNIGSRSQRIACGGQYG  
GQIYGGMVGQGMGGVGGQGMGGFGCQGMGGQCIQNGQVSMGSPGRSLPGQAMGMGGQVMGM  
PGQGGIGMGGQCIGNQGMGISGQGRGAHQGVPIQVIGVGSQGTGMSYGGGGGGYGGPQSQGGFTGRIG  
SVAGGGGRGEGIRGVCIDERLLKPLSVGVDPEEQKARTHEKEEMKTLLNNQFACFIDKVRSLQKQKVLGTK  
WELLNQVCQPAKKNLEGYENFIATLKKQLECLLSERKLEHEQKNNQELVEEYRSKYEEEEVNRRTAEN  
EFVLLKQDQVGIITKEBELESKVQVLAQLEVLRCVFABEELTQLDTSVILKMDNTRDLHMDLILQ  
NVENWYQNI AHNKSQEAFAFYHNKIAEIQNNRSKFNEELKCNQHEIAELNRVTRRLRDLGNACKQVSNL  
QSAICDAEQRGLDALKDARNKHAELQNAYQQSKDKLASLLRQYQDLNNTKMALDIEIATYKMMLEGEESR  
ICTGNPVSVMVSGGYVPGCEAGMGGA VAYGGAVGRSLEHGVTYSVGVGEGFSSGAGCIHTMGSRSASA  
GSVGRASGVGYGIRHSSSGGSGVGGVGSNVTTKHVVGAGGGRHSSGISIDGSCVSGHHGGVHHVVGAG  
GSGGHSIGSGIGVHTSNVYAVGTGGGHSMSMHGSRSEVRNVHVHGVSSVRKTA F

>Lizard\_HBS3

MMALQMSTARNIMRERGFSSRSAYLGGHRTYAASVRYVVRNGYGVPGFTSQSLANMGVSRRI SCGGYGG  
YGAGCYGAYNFHGGYGSGLGFCGMAHFSPRTYEAVGSYGFPGGYSNSKGNLHEVKVNEKLLQPLHVGAD  
PQEHDAQNQEREEMKNLNNQFACFIEKVRILEQENKALETKNWLLQYAMVPRRNLPEYENFI SNMKYQ  
IDCLLHTREHLANDKNAIQELVEDFKSYEEEEFKRRTAENEFVLLKQDQVDSISLSKTELEGKMNLLRWE  
LEFRKSVYMEEELMQLSGQISDMNILLVQMDNRRDLMDMSI IKNVAAWYQSI AHRKSKEEVNLYADR FQELQ  
EQRGKYLNLDKINQYIEEELTRAVHTLQSDHSNVKQVDALQASICDQVDRGDQALKDAQEKHSDDLALSAL  
QKAKDDL AGLKDYHDLNVLKALDIEIATYRLLLEGEETRLHTGF PFSIDVVRPQYMAN SAGFAVPYGY  
GSMGGGYSNAYGGGYPGISHRCYNRNCSSRSVGECSKPTNNSAATKPSGSADETFSPGTANSRRGASYS  
GGSPTSPGDISSSTEKAFETGVSGAGFSLGSEQEPTRYVQGRRTASGPNRGYFPGYQGHGAI PFR  
AEGLGPRVRAAS IILGYNPGIDMGNTGVSGSISIPAVRGLSLGGGQPCVGF GAP IAVCHAGTVGGLGGICY P  
GPLGAPGMCYPGVGIL

>Lizard\_K78L1

MSQPCVSSGSLSGKRCVTSASTISRGYRGNLSLSSICYTGAGRNGGTYNISHYNIGRSRRLSGSSGGNG  
GNSGVYNASFRDFSSLYSAGSFGYAGVAKPSSFSYSLGAYSPGEGFSSRSLGEGYGTYSYSSGYRNSF  
SSRSLGAGHSKNYGTTFSSRSLGGGVFGSRGLIAGGLFCSSSLGSDAISRHDGRG IHA VRVNAKLLRPL  
CIKVDPEI SRVKEEEREQIKTLNDQFACFIDKVRHLEQQNKLETKWSCLQQQEPMEKQNTHELYQNYIV  
TLKKQLDLDDLEDEQKLEQVFKQDQVVEEYKSYEGVINRRLGAENEFVLLKQDQVDCAYTSKVELEVKVD  
SLRQEQDFHRCVYDTELESLATASDNTNVVSMDNSRDLDMEGIIESVRCQYEEIAQRSKDEVNLYETKY  
KELQTTWGHHCNSLSSSRHEIQELTRLIQRYKADVENGKKQVEALQVAVADHEQQGDCTLKDAKEKLAEV  
EKALQSTKDELARLLRQYQELLVKVALDIEIAMYKSLLEGEESRICNSTPVNISVTGFSNIS IAGGGHG  
GGAGFRRYISGPGRRRHVSNARFTSRSGHPTPKTFGSSRSRGNLPRCTMSSGRECTASPVVPSGEP  
RDFAPLKL GSTASGVSSSRSRNRSGSCSSGRVRMS PNGGVSSIGNVTVSSSYTTHGTTTNTGEEYSS  
RY

>Lizard\_K78L5

MSRQFSSRSFSTGRRGYSFPGSGFRVNGSTSLVPVGGVGASSGGFGSRSLHSLGSKKISMGIVSGGG  
GSGGYFAGGVGGRNLGSLGFSFSTGYGGGLSGVGFGGGACLGGGVALGSGVQGGPAGGFGGGGYGLS  
GPGPLPAPGRIHNVVVKNNLLAPLRVEVDPIQVRVTOEREQIKTLNNKFATFIDKVRFLEQQNKVLETK  
WDLLYQQGT PALRDNLEPLYEAYIDTLRRQFESLTNDKNHLDIELKNTQELVEDFKSKYEDEINKRTACE  
NDFVLLKQDQVDSYMHKIDLGSKADSLTQHIIQFLRALFETELSQVQSQRVDTNVVLMQMDNRRDLDLNGII  
AEVRAQYEDIANRSRAEAEATWYQSKYQELQTQAQKHCDLKTDDIAEMSRVVKLRAEIEIIVKKA VNG  
LQSSIAESEQRGEI ALKDAQKLLDLQSA LTTSSKDELARLLRQYQELMNVKLALDVEIATYRLLLEGEES  
RMSGECTFPVNI SIVISSSTISGGGGVGVSGGRYGVGGGSLSLGGGGSGHINTGGGKISRFSGGG  
LSGSGNIASGGYSYGGSSSIKILPTTSTFSRISS

>Lizard\_K78L4

MSRQFSSRSGGGLRISHGYTSSAVALPGRSKGSFSSISLSQSGRGNLGVGLDGFGRSLYSLGKNKRTS  
LYVGGGGGFLVGGFGTGGGGGGYGGGGYGGGGYGGGGYGGGGYGGGGYGGGGYGGGGYGGGGYGGGGY  
LGGGGGRMAPIVPPGGIQPVSNPSLLAPLNLEFDPEIQKVRVKEREQIKTLNNKFASFIDKVRFLEQQN  
KVLETKLNLQQQGSTATTIHIDPMFEAYINNLRNQLDGLVGDGRGLDGLERNQDLVEDYRKRYEDEIN  
KRTAENEFVDIKKNVDGFMHKEI LGAKADGLTDEINFLRALHEAELSIIQGRISDTNIVLVQMDNRRDI  
DLNSII SEVKAQYEDIANRSRAEAEALYQSKFQELQSTAVNHGDDLKNTKNEIAELSR IQRMKAEIDNV  
KKQIAGLQTAIADAEQRGELALKDARVKLTDLQHALQSAKDELARLLRQYQELMNVKLALDVEIATYRLL  
LEGEECRMSGELTTPVMSVIVSSSSISIGGSSYIGGLGGGGGGGRVSSGGFGLTGGGGGGGGGGGGGL  
GLGIGGGGGGYGVSSGIATGGRSYSSGARGFGGGLTAGGGGAGGGGSSSTKYVSTTSSSSKIVR

>Lizard\_K78L3

MSRQLNAKTFGSGKKFSAGSAIVFGAGRSQRSMGGGSGSYGLYSQSLYNLGGTKSISRSVVPDGLRRGGG  
FGGGGGMFSLGGFAAGVTRNGSFVNNGRNGSGSFYPPGHIQEVTVNQNLLAPLNLKIDPEIQEVRKEERE  
QIKCLNDKFAEFIDKVRFLQONKILETKLNLQOQPMPLKRRKADHTFEAYIHGLRQKLESLSSTERGRL  
GSEWKNMQDLVEDFKRRYEEIEINKRTTAENEFVLLKDDVDLAYMNMELKTRTASLDKEVDVFLRSLYEEE  
QAQMOSQVTDTSIILSMDNSRDLMDMVIIEAEVKAQYEDMANRSRAEVDAMYQSKFQELQLTAGKHDDALK  
NSKTEILELNRLIHRRAETGTVKKQCAFLOQSSIAEAEERGETALKDAREKLTKELENATQKSNEELVRL  
RDYQELLNKVIISLDIEIATYKTLLEGEECRMSGECGGAVNISVVSNSMLGGNGLGRVRLSGGRGGGGG  
SSESSRGIVGIVYSSGGGGSSHGLKIISTTSTSKRTTIR

>Lizard\_K78L2

MSIHTGFQSSKGSRRGYSSCSAIGGGGGGRHTYSCRGFGGGGGMRGQYGSRSRLHNYGGGTRISYGRGY  
GGGMYGGYGGYGGGAGMGGGGFGSGMGGYGGGGMGYGGSGMGGYGGGGMGGFGGGGMGGGFPGGIG  
GGFPGMGGGGGGGGGFPGGLAGGPGGIGSVQIDPSLLRPVNVIEIDPQIQVKNQEKQIKLNNQFAN  
FIDKVRFLQONKVLQTKWQIILQOQTQGRGPMQNLDEYQFLNGLRNQIDQIRSQKQQLMSELQNMQQV  
VEDSKNKYQEINQRTTSENEFVLLKDDVDLAYMNMELKTRTASLDKEVDVFLRSLYEEEQAQMOSQV  
TDSIILSMDNSRDLMDMVIIEAEVKAQYEDMANRSRAEVDAMYQSKFQELQLTAGKHDDALKNSKTEI  
LELNRLIHRRAETGTVKKQCAFLOQSSIAEAEERGETALKDAREKLTKELENATQKSNEELVRLRDYQ  
ELLNKVIISLDIEIATYKTLLEGEECRMSGECGGAVNISVVSNSMLGGNGLGRVRLSGGRGGGGG  
SSESSRGIVGIVYSSGGGGSSHGLKIISTTSTSKRTTIR

>Lizard\_K78L1

MSRQSYGLSIGGSRKGFSSHSVSLGGGNRVSFSTASVARGSSLRVSGGGGFGSRSLYNVGCNKRISGGG  
RGGGFGWGQGGGGFVGVGACYGGGLGGYGFGGDFSGAGGNPFPVCPGGIKEVTINQHLLQPLHLQIDP  
EIQKVRTEEKEQMKTLNKNKFAFIDKVRFLQONKVLTKYKLLQEQPGAIQKHLDPMEAYINNLRRQ  
LECLQNEKRGLDSELKNFQDMVEDYKTKYEEEINKRTQAENDFVILKDDVDLAYMNMELKTRTASLDKE  
VDVFLRSLYEEEQAQMOSQVTDTSIILSMDNSRDLMDMVIIEAEVKAQYEDMANRSRAEVDAMYQSK  
FQELQLTAGKHDDALKNSKTEILELNRLIHRRAETGTVKKQCAFLOQSSIAEAEERGETALKDAREKLT  
KELENATQKSNEELVRLRDYQELLNKVIISLDIEIATYKTLLEGEECRMSGECGGAVNISVVSNSML  
GGNGLGRVRLSGGRGGGGGSSSESSRGIVGIVYSSGGGGSSHGLKIISTTSTSKRTTIR

>Lizard\_K8

MKRTSVRSFSSRSYTPGPVVGSRISTSYASSSYGGSRLGSGVFRGASASLGGGGGGGITAVSVNRS  
LAPLNLIDPAIQVTRTEKEEIKSLNKNKFAFIDKVRFLQONKMLDTKWSLLQNKITRSNMDSMFEA  
YINNLRRQLDGLGQSERVRLDSELGNMQGLVEEFKSKYEDEINHRTEKENDFVLLKDDVDLAYMNMELK  
TRTASLDKEVDVFLRSLYEEEQAQMOSQVTDTSIILSMDNSRDLMDMVIIEAEVKAQYEDMANRSRA  
EVDAMYQSKFQELQLTAGKHDDALKNSKTEILELNRLIHRRAETGTVKKQCAFLOQSSIAEAEERGET  
ALKDAREKLTKELENATQKSNEELVRLRDYQELLNKVIISLDIEIATYKTLLEGEECRMSGECGGAV  
NISVVSNSMLGGNGLGRVRLSGGRGGGGGSSSESSRGIVGIVYSSGGGGSSHGLKIISTTSTSKRTTIR

>Snake\_P\_K80

MTSHSGNFSAGSLTSPEASYSWRRQCSSSHSTRDEACSSPNLGEASKKNFSSSSLTGHGYHYTYPRVSVN  
KHLLAPLHLIDPALQEIIRTEKEEIKTLNQNFAALIGKVQSLQHNQVLLTRWNFLKEQDSSLSLDLIDK  
LLYDRYMNKLNLEIRSIDVEKEQLDSELDEVLASMDVFRSKFEEIEINKRSGLEFTFTTLKDLNDFLHK  
TELETKLSGLHAWVELMTTIEQELEEVMSSQIKDVSVVLGIDNNRYMPDPHRIVEDVRAQYEDLAIRSWE  
EALTRSKLNEREVLSAKYGDHLLNDRRVIAELNIQIQKMRSCIVSLKSQCLQLEDNINKVGLQGETAL  
NDAKAKLAKLEDALHSARQDLAQLVKEYQELMNIKLALDIEILTYRKLVEGEESMESPPAFISKIFSR  
PKSFLPDSIDITNVSDVARSRAKDLTNEMTQSSSLETGLSRSHNGKNVASSNGSFSSCNRRSGGTPDCS  
LSTSYISEGRDIFESSYSQRDNLGSPSRSSSNRSGNFADAEDTMSNSRSYSYRIGSNRSHSKRSGDNL  
ESSRYPGSEIRDSSEGSLSRQSNESGALTETVFARTYSETSDNIQEGNNSGSPSHTSAEFLSSKFSRTQ  
SGESNNSGPRYHRSRKEVDPGNQSQSQGNRDGELTDNTFARSHSGDSSEGLFRSFSYSGTSASYIEGDL  
SRSGDENECRNTHGNEGYKAAVSRINRGIIEGGSQSSRRREGFADTDLMKYQSKESKGSHEDETSFDP  
EEFAGPVLCRTRSAEDGGVPPVGGIIESSSEVSRNSSLGDQNSSTDTVFPQAHTEGTQEDSLNYPSTNT  
TAFVEGVSRSLSDERQSVSKSGFKTPSIKSTLSDSVFVRPTPTSVDEEMCEESVLKIHRSRARESSLET  
NISGDPSPRSEELLPSDLRSLHMKESRQVSDNNPSLRGCGSKSKSESFGSKNQSNRKGGLTESVFAHRS  
DPAKDYFSSQNDGSEGFVKAQVSRINRGIIEGGSQSSRRREGFADTDLMKYQSKESKGSHEDETSFDP  
YGVRYASETNEAVLQSGLSRIEYEQAGSFRRNRSEGRNPVETSTPIQLHRKNEEATEHSFRRSHSEESGS  
FKAADLLSRSSSQESRGISEATISSCGKENEKCTEGMLFRNYSYRCAVTSHPRTESAEAEADIPESELYR  
SPSESGRLLSSPGIYRGRSGEREDESEVAFSRSYSNRDEVAMNNQCIISHDNRNE

>Snake\_K7

MSQLTSFSSRSATAPSNFSQVRISVSSSRGIRGGGFRKPGVFGSTSLYNLGSNSRRIAPSFPVPSFG  
YGGGIQEVINPNLLSSLNLAIDPTIHKIRKEEKEQIMVLNKNKFAFIDKVRFLQONKMLTKWSILQO  
QKTSTRNNTAPVFDAYINNLRRQLDLSLQNDKGRLEGEELKMMQDLVEDFKNKYEDEINKRTTAENDFV  
LILKDDVDLAYMNMELKTRTASLDKEVDVFLRSLYEEEQAQMOSQVTDTSIILSMDNSRDLMDMVIIE  
AEVKAQYEDMANRSRAEVDAMYQSKFQELQLTAGKHDDALKNSKTEILELNRLIHRRAETGTVKKQCAF  
LOQSSIAEAEERGETALKDAREKLTKELENATQKSNEELVRLRDYQELLNKVIISLDIEIATYKTLLE  
GEECRMSGECGGAVNISVVSNSMLGGNGLGRVRLSGGRGGGGGSSSESSRGIVGIVYSSGGGGSSHGL  
KIISTTSTSKRTTIR

>Snake\_K5L2

MSHRANIKIQRGFRSNSAILPNLCRTNWSQSIVGRSGNCGIGRASWGRAGGTGFGSLSLYNLGGPRRIA  
VGGYSGSIGGGYGGYGGVCNGYAVGGGIGGGYGLGGAGFGGGRGDSCFPVCPGGIQKVTVNPNNLLVPL  
KLEIDPTIEKVRKEEIQIKILNKNKFAFIDKVRFLQONKVLTKWTLQKHDKQKTVMSNVEPLFEAYI  
NNLRTQVNDLEKVKVLDGELHTTQNLVEDYKSKYEDEINKRTQAENDFVILKKEVDLAYMNMELKTRT  
ASLDKEVDVFLRSLYEEEQAQMOSQVTDTSIILSMDNSRDLMDMVIIEAEVKAQYEDMANRSRAEVD  
AMYQSKFQELQLTAGKHDDALKNSKTEILELNRLIHRRAETGTVKKQCAFLOQSSIAEAEERGETALKD  
AREKLTKELENATQKSNEELVRLRDYQELLNKVIISLDIEIATYKTLLEGEECRMSGECGGAVNISV  
VSNSMLGGNGLGRVRLSGGRGGGGGSSSESSRGIVGIVYSSGGGGSSHGLKIISTTSTSKRTTIR

>Snake\_K5L1

MSRVSYRSSSSGGANRGTSGSAIVGGGGGGGRSGFSSYSVSRVGGARGGGSSYGLGGFGSRSLNHMGGG  
KRIAYGTVCGLRSGGYYGGYIGGGGGFYGGMGAGGAGYGMGGGPGGFLVGGPGFVRGGPGFPVCPGG  
IQEVTINQHLLQPLNLEIDPEIQRVRSHEREQIKTLNNKFASFIDKVRFLQONKVLTKWELLQRQGTQ  
VQQRNLEPLFENYIANLRKQFDYLVNERGRLDLMELRNMQDMVEDFNKKNYEDENKRTGAENEFVVLKQDV  
DGAYMNKIELASKSDSLNDEIEFLKALFEAELSQMQQVSDTSVVLSDMNNRSLDLNSIAEVAQYEDI  
ANRSRTEAESWYQSKYEELQVSAGRHGDDLNRNTEISELNVRVQRLRSEIDAYKQCANIQAAIAEAE  
RGEALAKDAKQLNELECLQTKQELARQLKEYQDLMNIKLALDIEIATYRKMLEGEEIRLQEGVGNVS  
YSVISNTTTTGYSGSGGLGLGGGFGGGSAGGLGGGFGVIGGGGGGGYAISSGSNYGGTGFSGSFSSG  
GSSYSIGGGRHSSGGGGSSVKIISKSTSTRKAY

>Snake\_HBS1

MSRQISASQRNAQSHFNHYSASSSSWFHSGSKSSRNMSNFGGRRTTSLSCGDHKSCTCGSGIQGVPRRY  
SIQGIHVDPKLLLEPFHVISPEIQKVKCKEMEQMKSLSKFAFIDKVRLEQKNQLELTKWAFLOQQTK  
PPTESLECMFEQYIASLKKLELYLQYEKENLQNDRESAKAQTADCKCKYEEKVKQHVAAEKEIIELRKDV  
DYIFSNNAELEKRVSLLDREIKFLKCVYKKEKQLDKQDQDVVVKMDNSRNLDMNDNIAMVRKQYEEI  
MQRSKAEADKFYQNKYEAAQSKSSSYKWDLNKREQQISELIQQVEKVGQEQISLQKENEELKKTICEAAK  
GGEQASKEGQKYAELVKALQNGKDELASLVRDYQKVLNVKIVLDIEIAAYKCLLEGEERISRDSSSSI  
SISVTNSPCSSQSAKQKCKSEKAEGSCQCKPAGTKISISSDSETKQSEKSSVCKWSTNTK

>Snake\_HBS2

MDQQPFQANLRRSSITAIGCNDEIQINGMQNHSANCSFKRGNSSKSFHSGFRNHRISCYMGHQLKNLRG  
SRMDMRSITDHSFFVDAYNLGYRDIKPKPRYRNEGLELVNINKLLEPLYLGVDPHDHVKVQEKDQMKDL  
NTQFASFIEKVRSLQNRILITKWEELQNKMPKVKDLSTLFDNYIANLRKKIDYMFNEKNLENQQR  
MMQDLIEEYQCRYKEENRKEHLENEFILLKQQVDNEFKQKEREKRELLMENKEFLKYFFTEEHAAILN  
CHEPDTSVVLLNMDNLDVILKNDISWYHNIQARSKEANLIFYQNIQEDLQNKCCQCRESLQKTSDE  
ITELNRLVHLMQSKLDNEKKTAAALQIAIGDIEHKGDHALKDARAKQTELQNRIONSKDQLAVILRDYQD  
LMNTKLALDIEIATYNTMLEGEENRXXX

>Snake\_HBS3

MNIPVGSRLGSSRRFSSASVMGGRSSAPPQPYGRPHGAGGYSSMSLNNFGGSQRISYSQGYGGQIYAG  
VGGQRIQMGQQAMGMGAHAYSGGFGGGYGAECQGGYGGYGRMGSMSSMRSEIRGVSIDERLLKPLSLG  
VDPEEHKARTHEKEEMKILNNQFACFIDKVRSLQONKVLSTKWEELNQQVQPTRKNLEAYYGNFIGSLK  
KQLECVLTEREKLEHEQKNMQLVEEYRSRYEDEVNRRRTAENDFVVLKDDVDCVFLTKEELESKVDVLA  
QLEVLRCIFAEELTQFNHQICDTSVVLKMDNTRALDMDLILKNVEAWYQNIHTSKQEAFAFYHSKIAE  
IQNNRGKFNELKNNQHEIAELNRVVQRLQADTDNAKKQVSSLSQAICDSEQRGDIALKDARTKHLELQT  
AYQQSKDKLACLRLDYQELNLTALDIEIATYKALLEGEESRYITGNPVSVMVSGGYVPGCEPPGMGV  
GVAYGAAAGRGMEHNGFNFDGEGFTTGSAPCIHTMGPRNAGSGGMAAGVNHGMVHGAGLGTAGGVSA  
SSGGYTANVSTKHVMTSGGGRHNSGLSADGNCVNSHHSIHHVSVGATYVSGGSGMGHSSGAGGISGAVF  
GASRGESSGLRNVQVTSVSSSVRKFMY

>Snake\_HBS4

MTHQVSA TRNTFLSGRGFSSVSALGGLGGHRTYVASVRHPVSGGEGVHGFSSQSLSNMGGRGKVAHGGYV  
LGYGVCANHGSPA FVGPVGHYGRPVYDSAGNCGIFGGHNSGRGDGIHGVINEKLLKPLHVGVDPQEHIV  
RDHEREEMKSLNNQFASFIDKVRNLELQNKVLETKWNLQEHVIPAKKSLEPYENFISNMKKQLECLLN  
NQEHLRNENDGIEQLVEDFKCNVEEERKRTDAENEFVLLKDDVDSISLSKSELEKGVHLLSGELEFRRG  
IYAEELAQSLSTNVYDTNILLQMDNSRNLDISDIKSVAEYKKNVAQGSKEEVNFAFYENRFQELQQQRKY  
SOTLKINQQEIA DLTRLVHKLQSEYDIKIKQVNGFQTSVCEIEHQGDCVLKDARDKHI DLQTA VQKAKDD  
LARLLRDYQELNLTALDIEIATYKTLLEGEETRIHLGNPVSIDVIKPGIENAVGSSFSGGYAPLGGGY  
GGGYDMGFGKGYGVGQERSNRNYSRSAGFDQNTGRSNIAPGNRSADA EYYQGRGYSYRNESC SGHPSA  
GMRQYFTEEAGRAGHGPGAGFSRTAYGSGGGRGYGSSTVVGNC PDNGYPRGGYEPGVAAFDGGGW  
YSRAGVPMGGAAGNPASVGI GGAAGGPAGVCYSGPLGTSAGV CYAAPAGTPAGV CYAAPAGTSSGVCYA  
GPVGTSGGLCYPTAVRLF

>Snake\_K78L1

MSRQCCTSKSFNGRRNYISSGGLHAGSNASSFRLLHSSRRYSGANLSSRQGYGAAPFGYSLGPVFGAG  
IAKNEEFSSQSAGTNSQARAAGNQSSGHRHREAFTSQSVGGGNSHGRRYRPEGFSTRSLGCNVRRAVGYE  
CLSRFGEGRGIHTVRINPLQLPRIQIDPEISRVKKEEREQIKTLNDKFVVSFIDKVKHLEQQNKLETK  
WNCLQQQEPVEKANIQPLFENYITSLKQQLQRLNLEREQLEQSQFQDMVEEFKSRYEIEINHRMSAEN  
NFVLLKDDVDIAYSNKVDLEVKVESLRQELNFRVFEAEIESIQANAETNVIIVSMDNSRVLDMEGIIH  
SVRSQYEEIAQKSKDEVNALYENKYKELQNTWGNYCNNLSSGRHEIQELTRMVQRCRSEVESTKKQIDAL  
QTSIADNEQRGESALKDAKLKTEVENNLQSSKDELARLLRDYQNVNLVKIALDIEIAMYKSLLEGEENR  
PISNAPPVNI SVVGSNISVAGGCSYGRITGRRQGYTQRNKNNGSGRSSRSRSDHGSKHALTPRSGDLSKS  
SISGFGQSGSPVVSSTPKNSDLANVGSPPGGYSSKSRGYSSTNTTHISATTVSSK GASGGISVSGS  
YNIQSSGGYSDDYSSLY

>Snake\_K78L4

MNRQFSSRSFSTGRRNYSVSNSGFRVGNSSSTVIGGVGSFGGGFGSRSLYNVGGSKRISMGLASGGGGG  
AHFGRSLGGGLGFSSYSYSGYGGYGGGVALGGGIGLGSVHGGFGGGSGGGYALSGSMPCPPPGRIHNVI  
KNLLTPLHVEVDPEIQRVVQEREQIKTLNNKFASFIDKVRFLQONKVLTKWDLCCQQGSPALRDNLE  
PIYEAFLBALRRQFDSLNDKNHLDIELKNTQELVEDFNKKNYEDENKRTACENDFVVLKDDVDVDSYMHK  
IDLGSKADSLTQYIQFLRALFDAELTQLHSQVKETNVI LQMDNDRDLDSIAEVAQYEDIANRSRAE  
AEAWYQTKFQELQSTAFKHGDDLKTKDEIADLSRIVQRI RSEIEIVKKAISSLSQSSLEAEQREGELALK  
DARTKLLDLQALTSAKDELARLLRDYQELMNVKLALDVEIATYRTTLEGEECRMSGEFETPVNIVSIVSS  
SSTISGGGGGYGVGGSGYAGGGAGYAI GGGSSGLNMGGGGGGGHSHISVGGGKVSRSFSSGSLSGSG  
SLTGGGYTYGGSSMKIVSSTSSSKRLIS

>Snake\_K78L3  
MSRQFSSRSRSGGIRTSTRGYTSSTAVIPGGTKASFSSVSLPRGVKSTGLGGGFSRSLYNLEGSKRISFG  
ISHGGFGGGFGGGLGFGGGGGGFGSGDGYGYGAGGYGLSLGVGSYGGGGRMGPMVSPGGIQKVTVPNPL  
LSPLHLEIDPEIQKVRQHEREQIKTLNNKFASFIDKVRFLQONKVLTKWNLLQOHGSSVPKLSLEPLF  
ENYILNLRRLDLSLIGNRAKLDSDLRNMQDLVEDYRRKYEEEINKRRTAENDFVGIKKDVVDSFMQKVDL  
QAKVDRLLIDEINFLKALHEAELIQIQGQISDTNVVQLQMDNRRDLNLSIAEVKAQYEDIAANSRAETEA  
WYQNKFFQLQI IAVGHGDDLKTIKNEIRELNRLINRLKAETENVIKTISRIQKAIADAERQGLAKDAQ  
VKLNDLQQAIONSKDELARLLRDYQELMNVKLALDIEIATYRTLLEGEECRMSGELTAPVMSVMNSSST  
MSGGSQVSSGGFGLGAGGGGGGSGAGGSLGLTMGGVGGGFGISSGITGGSSYSTGSGYGGGIGGGGRG  
SSSMKYVSTTTSSSSSRKAVR

>Snake\_K78L2  
MSFQAI CQGSKGSRRGYSSCSAFGGGTGGGIRRSYSSCRGYDGGMRGQYGSRSRLHNYGGVTRISYSGSYG  
GSICGGYGGYGGMGGYGGIGGGYGGIGGGYGGIGGGYGGIGGGYGGIGGGYGGIGGGYGGIGGGYGGIGGGY  
PVRVEIDPQIQVKNKFASFIDKVRFLQONKVLTKWNLLQOHGSSVPKLSLEPLF  
QFLNLSRSQIENIRSQKQLTTELOSMQHVEEYKKNYEEEINRRTAENDFVVLKDDVDCAYLSKSNLD  
SRVGALADQINFLRRI FEVEISQYQTGGQDTSVVVSMNNTLNLEGIIDEVRSQYEEIARSSRAEAESW  
YHSQYEAALQNTAGRHGDNLRNTRQEIQELTRNIQRLRSEIEHVKKQXXX

>Snake\_K78L1  
MSRQSFQMSVSGNKGSSSACFAGGQRMFSNVSASRGC SVRSGGGAGFGSRSLYNLNQGNKRISY  
GGVSGFAGFGGGCGGGGSGAGGGY GAGYGFNAFPACPPGGI KEVTINHHLLQPLNLEIDPEIQKV  
RVEEREIDKTLNNKFASFIDKVRFLQONKVLTKWNLLQOHGSSVPKLSLEPLF  
LNERRGFESELNKFNQDLVEDFKNKYEEEINKRRTAENDFVVLKDDVDAAYMNKVELQAKMDALTDIEINFL  
RCMFEAELNQMQSVSDTSVVLQMDNRRSLDLNSIAEVKAQYEDIAQKSRAEAESWYQCKYEELQVSVAG  
RHGDNLRDTEIAELNRTIQRMAE IENVKKQCEKLQASIAEAERELALKDAREKLESELEALQKSK  
EEMARLLKEYQLMNVKLALDIEIATYRKLEGEESRMSQSAVSVSVIGSSGGMGSGFGGGVCFG  
GSSGGFGGFSGSGRGYSVGGGGVCSVGGYGGYSSSCGSAIVKKTSSSSSFMSSGRK

>Snake\_K8  
MMRKNYRNTSSTVRSFSSRSSGPVASSRISTSYSSAGSGFGGSRYGGGASFRGTSAGSLGGITAVSVNKS  
LLAPLNLEIDPAIQQVRIKEKEEIKTLNNKFANLIDKVRFLQONKMLTKWSLLQNQKTRSNMDSMFE  
AYINNRRLQLENLQGERARLDAELGNMQGLVEEFKNKYEDEINHRTEKENEFVLLKDDVDAAYMNKVELE  
SRMECLTDEINFLRQFYDEELRVLQSQISDTSVILSMDNRRSLDLNGIITDVKAQYEEIANRSRAEAERM  
YQIKYEELQTVAGKHGDDLSTKNEINELSRMINRIQSEIDGLKGQRASLEAAITEAEERELAVKDANN  
KLAELESAMQTRAKQDMARQLREYQELLNKALDIEIATYRKLEGEERLESQMNLISIQTKTGTGYSYG  
LSSGFSYGGGYNSSYSSGGYSMNMLPMESSAISKTKAIVIKKIE TRDGLKLVSESSDVL SK

>Frog2\_K80  
MASNAQKSSHTSFVWQQEDMVVRESLFPSPPPSVSCQVISSATNGNHSTLLEETFESKLIKITSIDHSSLH  
SEEAETKLRAALATFNDRIRYLEKQREILLESRWSMIQTEETTQDLEPQYLSYISRLLEEVKNVTQNNHQ  
TQRLLDMMDSVNDMKDFEDELFRRTDVEYSFVELKKDADGRSLEQTELETRQDIKEMI DLMTKTVYKQ  
ELKELMEDSGDISVLNMEQSCPLNLDKVVEEVKAQYERIAAWSRDEAQAALSKNKLAEGVQRVGRYELEL  
KSSREITHLNSKIQRRLSEIQS IQKQCSKLEQDVSLAQTNSNMAIVDANTKVTEIQDVLKAKQDMAKQ  
LRDYQELLHVKMALDVEI AAYNLLLEGEESRLQASAPVNVQHGNVDCAFEPSRIRMHF

>Frog2\_K7  
MAFSSSRQTSFSTRSAVPAASFQMRISSTRSSSGGAGLGRAGGSFSSSSLSNIGGGVVKSVSYGVSSGR  
SGGAGFGGAGFGGAGFGGAGFGGAGFGGAGFGGAVSYPGPIQEVTTINQSL LAPLNLEIDPTIQHVRQEEREQIK  
TLNNKFASFIDKVRFLQONKVLTKWELLQNKSAKASNVGPIFLDAYIANLRRQLDGLTGDKKLEGEEL  
RNMQDLVEDFKNKYEEEINKRRTAENE FVVLKDDVDAAYMNKVELEAKMEALTDIEINFLRALYEAELREL  
QEQISDTSVVLQMDNRRSLDLNSIAEVKAQYEDIAANSRANA EAVYQNKFQELQATAGRHGDDLRTTKT  
EISELNRAMQRLQAEIESVKAQRAKLEAQIAEAERELALKDARTKLAELAEALQKAKQDMARQLREYQ  
ELMNVKLALDIEIATYRKLEGEETRISEGGPVSVSVVNSTSSSMGGSSSGY GAGYGSFGAGGSFSSG  
FGSSSTKFGSGSSGVKYSVTTSSSSRSFRQ

>Frog2\_03  
MSQHSICGSKGYKNFSSVSA CLPKNVSRYSVTSLSSKRGVGHGHRAQPSFSSRSAYNTGSGIHKISVGS  
HSGGGHCGGFNYGFGHGSGFERGFAGGAMNGGIAPVTVNQSL LAPLNLEIDPNIQVRREEKEQIKTLNN  
KFASFIDKVRFLQONKMLTKWAILQEQRTARSHIEPLFEAYIGNLRRQLDCLLGEKSRLEGERKNMED  
IVEDFKRKYEEEEVNRRTAENE FVVLKDDVDAAF LHKAE LQTRVESQTDENVNLRMTFEAEIAQLQGGQIS  
DTSVIVSMDNRRSLDLNGI IAEVKAQYEEIANRSRAEAESWYQSKYEELRLTAGRNGDDLRTKNEVADL  
NRMINLRGEIETVNAQRGKLEGAITEAEEREMATKDAKKLADLEELQKAKQDMARQLREYQELMNV  
KLALDIEIATYRKLEGEERLSEGGAGSVKISVSSSTVGGSHGGGNSYHHESGMSGNGHGCSGKFGGG  
SGFSSMGGAFISRGKHSSVSSSGSKM

>Frog2\_04  
MSVSRQTVYSTGGTKRFSAVSPGGTRSSFSTLSVSRAGGGGGRASYGGYGGFGRSLQNAAGSRRIA  
VSYGAPSHFGFKSSGIESHIGGNYGSDMMSIGMGQPPFGGPFVCPGPGGIQEVTVNQTLLAPLNLEID  
PSIQIRIRTEEREQIKTLNNKFASFIDKVRFLQONKVLTKWNLLQOHGSSVPKLSLEPLF  
QLDLSLEKVRLLDRLQMDAVIDYKKNYEEEINKRRTAENE FVVLKDDVDAAYMNKVELEAKLNALTD  
EINFLRAVYEAETQMQTQISDTSVVLQMDNRRSLDLNGI IAEVKAQYEDIAANSRANA EAVYQNKFQEL  
QASAGRHHGDDLRTKTEISELNRMINLRSEIDSVKKQCAKLQAAITEAEERELALKDARKKLADLEEA  
LQCKQEMARQLREYQELMNVKLSLDVEIATYRKLEGEERLSEGGAGSVKISVSSSTVGGSHGGGNSY  
GMGGGSGFGGSGFGAGSGYAI GGGQSFGGGVS VSGMGGASFSVSSGKMAAFPGSGSSSNVKIISKST  
SSRKL

>Frog2\_05



MSHYKQFSVRSVATSGKPGFSSFSVSKSGGGFSGSSGGGSFGSRSLSYVGSRKVSSVGSASGGGFGAAG  
FGGRGFGGGVGGGAFGGAGGGAFFGGAGGGGFGGAGFGGGGAGFPGGPSVGIQEVTVNQSL  
LAPLNLEIDPTIQKVRLEEREQIKTLNNKFASFIDKVRFLQONKVLKTKWSLLQEQQGQVKGSRKNNID  
PIFDAYINSLKRQLDALQNDKRLDGLLRNMQDLVDDFKNKYEDEINKRTSAENEVVIKKDVAAYMGK  
VBLEAKVDALTDLNLFLRTFFAEELGELQAQISDTSVVLSDMNNRDLDESIIAEVKSQYEDIKKSRAE  
AESVYQGVQELQASAGEQGDVLRNTKSEISELNRKSQRLKAEIENVKQIAKLQASITEAEERGDVLK  
DAQSKLAELEAALQKVKQDMARQLREYQELMNVKLALDVEIATYRKLLEGEFRLNSDVNNVSI SVISSG  
KSSSLGGGGGSGAGFGFGSGGAFFGGSGGAFFGGSGVSVFSGGGGFSSSSSSFGGGVGSVR  
YSSSQSSYRS

>Frog2\_06

MSWSLHQVTTSTGSGKFGSGLSLGGGSRMGINSASASSRLSNSSARFGSRSLLISGSRKVVSVASSGRF  
GAGYGAI SAAGAGGFGGPGSFGSIQVNNINQSLAPLNLEIDPSISVVRKEEREKIKLLNNKFASFIDKV  
RFLEQONKVLKTKWSLLQKQVSKSRSEIESIFNTLITSLRSQDLSLVKDKGLLGGELQVMKDHAENFK  
NKFEELFKRVLADENFVSLKQDVTATYLIQVQLETKQKALDDELAFLRNLYKEELDGLKQQTAGT SVVL  
SMDNSRMLDLGDIADVKAQYEDTTRRSKEEAAYQSKYQQLQLAGQQGEDLKSSKKEISEVNRVQK  
LRNEIESVKKQIASLQVSIQDSEERRGDIALRDAQEKLNLERLALQKAKQEMAQQLREYQTLNVLKALDV  
E IATYRKLLEGEESRITGQVSDAVTVSVFVSGAKSSFDATKRSAGIDTGVKRRGSSGVKII SKTESSSLVS  
LYQ

>Frog2\_07

MNRGQQSFASRSVAGTKSFSSSSSLGGGGLGARGGGGRISFSSASVSKMGGRASGGGGGFIQSGGASF  
SQSLHNLHPLGGTRKTAISSGSRVAGGIGFGGAGGGGFGGAGGGGFGGGGFGGGGFGGGGFGGGG  
GGGGFGDGGFGGGGLGIDGGFGGMNFPVCPGGI QEVTVNQSLAPLNLEIDPAIQKVRTEEREQIKTLN  
NKFASFIDKTRFLQONQVLTQKWEELQEHGQKGVTKRSNIVLFEAYISNLRRSLDLSLNDKHRLES  
RSTQDLVEDYKKNYEDEINKRTAENEFVVLKDDVDGAYMKNVELDCKVDALTDENFLRTLYEAEVQDL  
QQQLSDISVVLSDMNNRDLGDI IAEVKCQYEEIANKSKAEAEACAMKQQQLQATAGQHGDLSKSSKT  
E IADLNRMIQRLKAEIESVKKQCANLQTSITEAEERGLAVKDAQKDLDELQEAALRKAKEEMAKQLHDYQ  
RLMSIKLALDIEIATYKLLLEGEECRISEGYQNPVSI SVISGSTS ISSVGGGFGAGGGGFGAGGGGFGA  
GGGGFGAVGGGYGAGGGGFGAGGGGFGAGGGGGYGVGGAGGGGFGAGGYGVGGGGQFGGGGGYSMGG  
GGGGFSSGSRQGVAIISTTSSSSSSKMN

>Frog2\_08

MSQVRQLSSKPGSCNVRGYTACSIGGGFVGPKNFSSLSAGGNPIITYSSGKLLKSTGSLYCLGGHKRTS  
ISSGRVLGSTLGTSGFGTDSFPVCPGGI QKVTNVI LLQPLNVEIDPNIQKVRSAERDQIKGLNNKFA  
GFIDKVRFLQONQILGTQKWNFLQEKSKLCSRRDTIKPLFDAYITNLQRQLEGLRSEKCRLDGELKNMQ  
DVVEEFKCKYEEIEINKRTCTENEFVALKDDVDILYMKKAELEAKEESLNEINFLRNI FDAELAEQLDCL  
SDINVLSDMNNRDLNGLIAECKAQYEEIAARSKTEAEAAYSKKFQQLKEAAGQHGDNLRSKTEIQD  
LNTMIKRLQSEIECVKQIAGLQAAICDAESRGEATLKDANCKMSELEAVLQKAKEDLAIQLREYQELLR  
VKLALDVEIATYRTLLEGEESRMHGEITNDVKISVYSTKLLGDSNAECISTCNLKS SGI LAGVEAPKCA  
PMCAPKCAQPPKPCGTAYAKLGY

>Frog2\_09

MSQVRKSLSSKPGSCNVRGYTACSIGGGFVGPKNFSSLSAGGNPIIHNHSGKLLKSTGSLYCLGGHKRTS  
ISSGRVLGSTLGTSGFGTDSFPVCPGGI QKVTNVI LLQPLNVDIDPNIQKVRSAERDQIKGLNNKFA  
SFIDKVRFLQONQILGTQKWNFLQDKSKLCSRRDTIKPLFDAYITNLQRQLEGLRSEKCRLDGELKNMQ  
DVVEEFKCKYEEIEINKRTCAENQFVGLKDDVDVLYMKKAELEAKEETLANEISFLRSLFDAELAEQLDCL  
SDINVLSDMNNRDLNGLIAECKAQYEEIAARSKTEAEAA YARKFQQLKETAGLHGDNLKSKTEIQD  
LNTMIKRLQSEIECVKQIAGLQAAICDAESRGEATLKDARCKMSELEAVLQKAKEDLAIQLKEYQELLR  
VKLALDVEIATYRTLLEGEESRMHGEITNDVKISVYTTGKLGSSNAECISTCNLKS SGI LAGVDGPKCA  
TKCISKVPKCAPKCAQSPKPCGTTCTKPSYM

>Frog2\_10

MVTVDPNIKRKAEREQIKTLNNKFAAYIDKVRFLQONKVLKTKWLLQEQQTKGSTKRANLEPLFEK  
YIGDLNKYLSTLINEKGSLEHELKLNQGFVEDYKCKYEEIEINKRTKAENDFVVKKGVDTAYMANRELEA  
KADGVTSEINFLKTLTYAAELSQVHDSVTNTSVLTMDDNRLDLNLEGI IQEVKAQLELSAQRSKMEAEALY  
DNKYKELQRTAEGHSDSIKNSKSEIAELNRRIQRLKAEIESTKQIAGLNQSIAGAEKGNLALKDAEKK  
IQDLEAAEKLLKEDMARQLKEYQELLAAKISLDVEISTYGLMLGGEERMSGQIVNNVNI SVISGGSNVY  
SALGAAAGGIRGGMGGMGSGMGMGDMRLGHSGGRGGHGAEGMGH

>Frog2\_11

MSFSQVSIKRKQTVSSGGGGRGGFSTCSLGAIGGSRAGGSYGSRSVYNLGGKYRTSISAASARGGAGGF  
GGAAGGGFGGAAGGGFGGGFGGGGFGGAGGMMGMMGGMPGFDGDMGFPVCPGGI QQVTVNQSLAPLNLE  
LQPLDLAIDPNVQRVKAEREQIKTLNNKFAAYIDKVRFLQONKVLKTKWLLQEQQTKHSTKRANLEP  
LFEKYIGDLRRYLDTLINERGRLEHELKQDQDLVEEYKCKYEEIEINKRTKAENDFVLLKDDVDAAFMAKT  
DLEARVDGLTSEINFLRTLYAAELSQVHDSVTNTSVLTMDDNRLDLNLSGIIQEVKQYEQIAQRSKMEA  
EALYDNKYKELQRTVEGHGHSIKNSKAEIAELNRRIQRLKAEIENLKKQIAGLNQSIAGAEKGNLALKD  
AEKLLHDLAEAEKLLKEDMARQLKEYQELLAAKISLDVEISTYGLMLGGEERMSGQIANNVSI SVISGG  
SNVYSALGGAAGGMMGGMGSGMIGGGMGDMGSGSCLQSGMSVHGGKYGHGAGYEGGSMHGGSGSFGH  
HGGKTSSSVTSTYTTTKTY

>Frog2\_12

MSFSQVSIKRRQTVSSGGGGGRGGFSACSLGAIGGSRAGGSYGSRSVYNLGGKSRSTISAASARSMVG  
GLGSAAGGGFGGAGGGFGGGAGGGFGGGGFGGGGFGGGHGGGFMFGAGGMMGMMGMMGMMGMMG  
MGMGMPGFDGDMGFPVCPGGI QQVTVNQSLAPLNLEIDPNVQKVKTEEREQIKTLNNKFAAYIDKV  
RFLEQONKVLKTKWLLQEQQTKGSTKRASLEPLFEKYIGDLRRYLDTLNEKARLLQELKLNQDLVEEY  
KCKYEEIEINKRTKAENDFVLLKDDVDAAYMIKTELEAKVDAVTSEINFLRTLFAAELSQVHDSVTNTSVV  
LTMDDNRFNLEGI IQDVKAQLELAAQRSKMEAEALYDNKYKELQRTAEGHSDSIKNSKTEIAELNRRIQ

```
RLRAEIEINIKKQIAGLNQSIAGAEKGNLALKDAEKKLQDLEAAEKKLKEDMARQLKEYQELLEAAKISLD
VEISTYGLMLGGEEGRMSGEIANNVSVISVSGGSSVYSALGGAAGGMGGMGGMGGMGGMGGMGV
MGGMGGMGGMGGMGGMGGMGMSACGYQGGMGMGFEGGSMHGGSSYGHSGGKTSVAIASTTSTTKKT
Y
```

>Frog2\_13

```
MSFSQVSVKHHSGSGGGRRGGFSACSLGAIGGSRSGGSYGSRSVYNLGGKSRTSISAATRSMAGGLG
SAAGGGFGSAAGGGFSAAGGGFSGGAGGGFSGGAGGGFSGGAGGGFSGGAGGGFSGGAGGGFSGGAGGGF
QVTINTQLLQPLNLTIDPNVQKVKTEEREQIKTLNKKFAAYIDKVRFLQONKVLTKWKLLEQGTGKS
TKRANLEPLFEKYIGDLNKYLSLTLINERDRLTQELKNLQVLVEDYKKKYEDEITKRTKAENDFVLLKKDV
DTVYMAKTELEAKVDAVTSEINFLRFLYAAELSQVHDTVDTSVVLTMDNRRDLNLEGIKDVKAQLELC
AQRSKMEAEALFDNKYKELQKTAEGHGDSIKNSKSEIAELNRRIQRLKAEIENIKKQIAGLNQSIAGAE
KGNLALKDAEKKLQDLEAAEKKLKEDMARQLKEYQELLEAAKIALDVEIGTYGLMLGGEEHRMSGDIVSNV
SISVSGGASVYSALGAAAGGMGGMGGMGGMGSGHGGGYGHGGGFSGHGSFGHGGGFGAGHSGHGGHG
KTSVAIASTTSTSKKSY
```

>Frog2\_K8

```
MSIKTTTRVYTRTSSAAPRSGGFSSYSYSGAPAASRASTASFLGSSYGGSSIGGSRFGSGYRSGFGGAGV
GSAGITAVSVNQSLAPLNLEIDPTIQQVRTEEKEQIKTLNKKFASFIDKVRFLQONKMLETKWSLLQN
QKATRSNMDAMFEAYIGNLRRQLDGLGQDKMRLESELGNMQGLVEDFNKYEDEINKRTELENEFVLLKK
DVDEAYMNKVQLERLEALTDEINFLRQLYEEELRELQSQISDTSVVLMDNRRSLDLGI IAEVRAQYE
DIANKSRLEVESMYQVKYQELQASAGRHDLLKNTKAEISELTRYTTRLQSEIDALKAQRNLEAQIAEA
EERGELALKDARTKLAELAALKNKQDMARQLREYQELMNVKLALDIEIATYRKLLEGEESRLESQFN
LSIQTKTVSGVSSGYGGGISSGYGGGISSGYGGGISSGYGGGSSYSSNVSSLPLETSKTSKRSIVVKTV
ETKDRVLSSESDVFSKP
```

**Suppl. Fig. S1. Amino acid sequences of type I and II keratins of sauropsids and frog (*X. tropicalis*).** The amino acid sequences of sauropsidian and frog type I (A) and type II (B) keratins used for comparative analysis of cysteine contents and phylogenetic analyses (Figures 1-4, Suppl. Figure S5) are shown in FASTA format. The sequences are sorted according to species and, within each species, according to the order of the corresponding genes in the type I or type II keratin gene clusters (Figures 1 and 2). Accession numbers and data about the genes are provided in Supplementary Tables S1-S6. Species: chicken (*Gallus gallus*), alligator (*Alligator sinensis*), turtle (*Chrysemys picta bellii*), lizard (*Anolis carolinensis*), snake (*Protobothrops mucrosquamatus*), western clawed frog (*Xenopus tropicalis*).

# A

>Platypus\_K224

MSHSRQKSSSLWFLDLGRGGGGFAGKCKGFLGGGFRTIFGDGERGLLSGNEKITMQNLNDRLATYLDKVRALLEEANKLEFKIEERYEYKFGREAG  
GRGAKRDYKQYFQTIIEELKQKILDATTKSASFVLQNDNVRLAADDFKLYETELALRQVVEADSSGLRRVLDLTLTKTDLQVETLREELAY  
LKKNHAEEMKGLQASAGSDVSVEMNAAPGTDLTKLLNDRMRAQYKLAGQNRREAEAWFHDKSESLQQQISMVTDENSTAKSEMTELKRTLQALE  
IELQSAVALKNSLEGGSSGETETNYRAQLSQTQVQISALEARLLRIRTEMENQSTEHNLQLDVKTRELENIETRYRRLDDEGGHGGGSRTPGNPVK  
EPTKTFLYKTIVEELVDGIVVSSQIRNVHQRSA

>Platypus\_K24L4

MSCLARAAARSGGSGSVRVSGGGSSFSGSRRCMGGGSAYGSGGAGSCRMGGGAGGGFSGGCGSSVVGYYGGGFGGGAGGGFSGGAGGGH  
SAGASGGFYTYGGVGGGAGGGFSGGAGDGLFSGGKQTMQNLNDRLASYLKVRALLEEANTDLEVKIKQWYKFKPGSTVPGSGRDYKQYF  
IIDDRLNKIMAAATIDNAGMVLQIDNARLAADDLFRKYENELYLQSVVEADINGLRKVLDDLTMTSRDLEMEIESLTELAYLKKNHHEEELKGMQ  
GSSGGDVTVMENNAAPGTDLTKLLNDRMRAQYEAALAEQNRKEAEDQFNKQASLHAQISTDVGAAASSAKSEITELKRTLQALQIELQSLMTKSSSL  
EGLTAEATESGYVMQLSQIQHQITSLLEEQICQIRGETECQNAEYEQLLNIKTRLEMEIETRYRRLDGEAGGSSGLASSSTSSSLGGGSRSSVVVDS  
RVGQGRDANKTRVTKTIVEELVDGKVVSSQVSNVSEMVKV

>Platypus\_K24L3

MSCLARAAARSGGSGSRVMSGGSSFSGSRRCMGGGSAYGSGGAGSCRMGGGAGGGFSGGCGSSVVGYYGGGFGGGAGAGAGFGGG  
HGAGAGGGFYTYGGVGGGAGGGFSGGAGDGLFSGGKQTMQNLNDRLASYLKVRALLEEANTDLEVKIKQWYKFKPGSTVPGSGR  
DYKQYFPIIDDRLTKIIAATIEENAKIIISPIDNARLAADDLFRKYENEMYLRHSVEADINGLHKVLDDLNMTSCLKMQFESLTELAFLLKKNHE  
EEMKSMQGTGTDVTVEMNAAPGTDLTKLLNDRMRAQYEAALAEQNRKEAEDQFNKQASLHAQISTNAGATSSAKSEITELKRTLQALQIELQSL  
MSMQSSLESTLADTEAGYVMQLSQIQHQITSLLEEQICQIRGETECQNAEYEQLLNIKTRLEMEIETRYRRLDGEAGGASSGAAVSSSAGAASS  
AGAASRSTASRAAVSFDGASGASLARDPNKTRVTRTIVEDLVDGKVVSSQVSNVSEVRVK

>Platypus\_K24L2

MSCLARAAARSGGSGSARVSGGGSSFSGSRRCMGGGSAFSGGAGSCRMGGGAGGGFSGGCGSSVVGYYGGGFGSLGGGAGAGFGGG  
QGGGAGGGFYTYGGVGGGAGGGFSGGAGDGLFSGGKQTMQNLNDRLANYLKVRALLEEANTDLEVKIKQWYKFKPGSTAPGSGP  
DYRFRFYPIIDDRLTKIIAATIEENAKIIISPIDNARLAADDLFRKYENEMYLRHSVEADINGLHKVLDDLNMTSCLKMQFESLTELAFLLKKNHE  
EEMTVGQSSGGDVTVMENNAAPGIDLTKLLNDRMRAQYEAALAEQNRKEAEDQFNKQASLHAQISTDVGATSSAKSEITELKRTVQALQTELQSL  
MSMQSSLESTLADTEAGYVMQLSQIQHQITGLLEEQICQIRGETECQNSEYEQLLNIKTRLEMEIETRYRRLDGEAGGASSGAAVSSSAGAASS  
AGAASRSTASRAAVSFDGASGASLARDPNKTRVTRTIVEDLVDGKVVSSQVSNVSEVRVK

>Platypus\_K24L1

MRLNDRLASYLKVRALLEEANTDLEIKIKQWYVNLGPGSRDPASGRDYKQYFPIIEDLKNKILTATVDNASVILPIDNARLAADDLFRMKEYENE  
LYLRQSVVEADINGLRKVLDDLTMTSRDLEMQIESLTELAYLKKNHHEEIFTDVGEASSAKGEMTELKRTLQALEIELQSLFATQSSLEGTLADT  
ESGYVQLSQIQHQITSLLEEQICQIRGETECQNAEYEQLLNIKTRLEMEIETRYRRLDGEAGGSSRISGPKSTGSKSISIPPEGKSIQGRDSNKTR  
ITRTIVEDLVDGKVVSSQVSNVSEVRVK

>Platypus\_K25

MSLRLSSGSRRCRPPAGSVRLSASGAGFGAGNGCGVPGIGSGFSCAFGGGSSGGNLSASCSAFVGTGEGLLSGNEKVTMQNLNDRLASYL  
NVRALLEEANADLEQKIKGWYKFKPGSCRGLDHDYSRYFPIIEDLRNQIISSTTCNASAVLQIDNARLTADDLFRMKEYENELALHQTVEADVNG  
RVVDELTLCRTDLEIQYETLSEELTYLKKNHHEEMKALQCAAGGNVNVEMNAAPGVDLTVLLNMRRAEYEDLAEQNRRAEAWFNEKSASLQQ  
QISEDVGATTSARNELTEMKRTLQTELEIELQSLATKHSLECSLTETEGNYCVQLSQIQAQIGALEEQLVQVTEGQKLEYEQLLDIKVYLE  
KEIETYCRIDLIDGEDGACKSGSFKSTGYASGVLASQKLEPSKTIIVVKKVLEEVDQRKSVLTLRLHSLEEKQPSK

>Platypus\_K26

MSFRLSSGSRRCRAGAGPGRLSNTGTGLGAGNGCGVAGVNGFPFCAGGGPSSGGGFCGGVGGGLGGGACSAFIGSEGLLSGNEKVTMQNLN  
DRLASYLNVRALLEEANADLEQKIKGWYKFKPGSCRGLDHDYSRYFPIIEELKNEIVSVTTCNATIVLQNDNARLTADDLFRKYENELALHQS  
VEADINGLRVLDDELTLCTDLEIQYETLSEELTYLKKNHHEEMKVLQCAAGGNVNVEMNAAPGVDLTVLLNMRRAEYEDLAEQNRRAEAWFN  
EKSASLQQQITDDAGATATARNELTELKRTLQTELEIELQSLSAMKHSYECSLSETEGNYCQLTRIQAQIEALEDLQQLQIRTESEGQKLEYEQ  
LDIKIYLEKEIETYCCIDLIDGEDKACKSSCLKSKGYVPGGSGSQSKDSTQTTVVKTVVEELDQRGKVVSLRVHSVEEKSSKISNITMEQVRVPS

>Platypus\_K27

MSLRFSTASRRVGTCCGAGSVRPSAGGPGFAGNGFPFCAGSSGGNPGSASCASFVSGEGLLSGNEKVTMQNLNDRLASYLNVRALLEEANAD  
LEQKIKGWYKFKPGSCRGLDHDYSRYFPIIEDLRNQIISATTSNASVVLQNDNARLTADDLFRKFENELALHQSVEADINGLRVLDDELTLCT  
DLEIQHETLSEELTYLKKNHHEEMKVLQCAAGGNVNVEMNAAPGVDLTVLLNMRRAEYEDLAEQNRRAEAWFNEKSATLQQQISDDAGATTS  
ARNELTEMRRTLQTELEIELQSLATKHSLECSLTETEGNYCVQLSQIQAQIGALEEQLVQVTEGQKLEYEQLLDIKVCLEKEIETYCRILID  
GEDGACFKSIGYGSAGPAHQAKDSSRTTIVVKTVVEEIDPRGKVLSTRVHSVEEKSTKINIKTEPRMPS

>Platypus\_K28

MSLRFASGSRRCRPGAGCGNSNFSCSLGGGPAGGFSGLNGPGGNHIGGSLGNASCASFVSGEGLLSGNEKVTMQNLNDRLASYLNDVRA  
LEEANADLEQKIKGWYKFKPGSCRGLDHDYSRYFPIIEDLRNQIIVSSTTCNANVVLQIDNARLAADDLFRKFENELALHQSVEADINGLRVLD  
DELTLCRTDLEIQYETLSEELTYLKKNHHEEMKVLQCAAGGNVNVEMNAAPGVDLTVLLNMRRAEYEDLAEQNRRAEAWFNEKSATLQQQISD  
DAGAATTSARNELTEMRRTLQTELEIELQSLATKHSLECSLTETEGNYCVQLSQIQAQIGALEEQLVQVTEGQKLEYEQLLDIKIHLEKEIE  
TYCRILIDGDGESCFSKSYVPGGLGSPKDLKSTTLVKTVVEEIDQRGKVLSSRVHSIEEKSSKLSAIKTEQRTPF

>Platypus\_K10L2

MSYRLGSTKDFSSSRSGGGGRSSVSVSSSRGSSVGGGFSLGGGSAAGSYCYGGSSGGGFCSGGFGGGGGGGGGLGGGGYGGGLCGGFGGG  
SYGGGGFGGGYGGGFGGGCGGGGFGGGGGLSGNEKVTMQNLNDRLASYLKVRALLEEESNFELERKIKQWYKFKGSSSTQREPRDYSR  
YYQVIEDLKNQIITLTTDNASVLLQNDNARLAADDLFRKYENELALRQSVVEADINGLRVLDDELTLTKADLEMQLESLEELAYLKKNHHEEMR  
DLQNVTTGDVNVEMNAAPGVDLTELLNGMRAQYEQLAEQNRRAEAWFNEKSSELTTENASVEQMSGHKSEITELRRTLQALEIELQSLQALK  
QSLASLAEETEGRYCVQLSQIQVQITSLLEEQLQIQRAETECQNAEYEQLLDIKTRLENEIQTYRSLLEGGGSSGGYGGGSGGNYGGSSG  
GGSSPGGGYSGGSGGQGNNGFKVSSGSRSSGGGSGTGSTTKGPGTRF

>Platypus\_K10L1

MQNLNDRLASYLKVRALLEEANTDLEIKIKQWYVNLGPGSRDPASGRDYKQYFPIIEDLKNKILTATVDNASVILPIDNARLAADDLFRMKEYENE  
ALVQSVVEVDIAGLRVLEELTLTKTDLDRTELELAYLKKNHHEEIKSDSKTAPGDVSVIIDAAPGIDLTVLLNMRREQYESLAEQNRQEA

EARFTERSEELSVQISTSVREETSTNKSEMAELRRTLQTLLELELKSQIPLKQSLESSLAETEGNFCQALSQIQVLVGSLETQVQQIREETECQNA  
EYEQLLDIKIRLESEIETYRQLLDREGR

>Platypus\_K20L2

MPISRGKFIKRSNSNEAIFINPVFRMPAKQVIFYTPSVYGGAGGWGTRISTSTTQIQYGEGLGAGKLLTGNEKGTMQNLNDRNLANYLEKVRSLQQA  
NSKLEVQIRQWHEKNSTPLGRDRYSYKAIIEELQEQIKNAQINNAQLVQMDNAKLAEDFRKIYETELGMRLSVENDIQGLNKVTDLLTKKA  
RLESEIENLLEELVLLRKNHEEVDTLRKHGATVKKVEVDAAPGPDGAIINEMRDYKESLAKKNIQKAKERYETQTIETQITLNNRELETS  
TTQVKELRRKQCNLEMEQLSLLSQRDSLDLTLAETNTRYEARLAQLQAVLKALKDQLIQVRSESEKQRDQFNTLLDVKNRLEQEIITYRRLLEG  
EDIVTLDSETTTLEERDAKKIRKIRMVVEEVVDGKIVSSKTKEMEETLESGQMISSTPTANLESKLF

>Platypus\_K12L

MWTRQGRPLPQVHALEANTELEGKIRNWEARGPGAIALGTGGDFSKYDPTIEELRNKIIISATIKNAQMVLIQIDNARLAADDFRLKYEGELA  
LRQSVEADINGLRVRDELTLARADLEMQIEGLNEELIYLRKNHEEELQSFQAGGPGQVSVEMDAAPGIDLTLLNDRMRGRYEAMAERNRKEAE  
AWFIEKSGDLRKEISTHSEQLQSSRSEVTDLRRTLQNLLEIDLQSLAIKKSLEDTLAETEGGFCQSLSQMQYQIGNVEAQLTQVRADTERQNSE  
YRQLLNKARLEMEIETYCRLLLEGLAGDSSDENSPPASPRSAQSLDSSKDSKTRKIKTIVEEVVDGKVVSSQMRVEEQM

>Platypus\_K20L1

MPFIHRRHFRDDEDICISPMYRVPGRHLYYALSVYGGAGGWGTRISTGPTPFQYKGEVGMGRLLLGNEKLMQNLNDRNLANYLEKVRSLQQA  
KLEAQIRQWYQKNSTPVDDEDFSSYHQMIIEELQEQIQNAQKNKQVWILKIDDVKLKEENLRKFDNERAMCLSVEGDIQKWTKAIDDLTLMKARL  
EMQVENLLKERVVLKKNYQEEANLRKHGATINVKLDAAPGPDGAIINEMREKYEKLAEKNIKEAKWRLEKLMIELEKQVVDNDKELEVNMI  
KLKELRHKRQNLGIELQSQLCQKKSLEAILGRPKTHCEPELALIQEKLKIFKAQLIQIRSESERQKDFKILLDIKIRLEKEIITYRSLBERGA  
VGPD

>Platypus\_K23

MSSCYGSFQAPPRGGWARPGKIWRAPSVHGGAGGICISVSSSTRPFCGASWERYGGGGFGGGGKRGLLGGNGKETMQNLNERLAAYLEKVRSL  
AANTKLESRILEWHKKRDPDKQNYTVYEENINTLQEQIVDGLKNNAKIVLQIDNARMAVDDFSFKYENELSFNTNDEMEVEALRKILDDLTII  
TTDLEMEVEGMRREELILMKKKHEQEIATHCMPNDFKVNKVNATPGEDLVKILEDMRKEYEVIITKKRDLDTWYKGSASVSQDTGIEVVKTN  
KSDINELRRTFQALEINLQAQRSTKSALEAMLDKARNSCQLQNMQQVISHYETQLAQLRHDLERQNNYKILLGKIKTHLEKEIATYRQLMEG  
EGNGGMDSDSKSTRKESTKSAAPKIKAIQDSVNGRVLVLSQVSEIQ

>Platypus\_K39

MTTILFEDNWTSSHLTNCNPPSHLRSCGWYGEYFNGNEKETMQSLNARLASYLDKVRCLQEENANLECKIQEFCQNQAPAVCPDYLAYFRMI  
EELQKILCTKAENSRVLTQIDNTQLASDDFRTKYKVELSLRQLVEADINGLQRILGKLLCKADLEMQVESLKEELLCRNNHTEEVNSLQCC  
LGNRLNIQVDIAPSVDLNQALEKMRQCYESLLETNRDRIQEWNTQREELNQQIASSSGQLQCCQSEIELRRTVNALIELEAQHSLRNSQEN  
ILTEVKARYSSQLAQVQALIDNVFQLAEIRCDLERQNEQYVLLDVKARLEGEISTYRSLLESEDCKLPSNPCCARESTVSTCPCKPCAIECT  
APTQAACEPCNLCAAPPASLGGKCMPCKTCTPAPRIIVKIFTIIEEIRDGKIVISTQKLVQPCVFYNPQFQV

>Platypus\_K40

MTSACSSSCSPESCCRATDCPSVSTCSTDIPLCPATCGAARCQTPRFLCRSRLSSCYLPPVGHGWRDEWAFNSNEKETMQFLNDRNLANYLER  
VRCLEVENAELECKIREQCEQQIPFVCPDYQCYFNTVENLQKILCTKAENSRVAVQIDNCKLAADDFRTKYEAELSLRRPVEADVGGRRILD  
DLTLCKSDLEAQLESKEDLLCLKKNHEEVENLQAQLGDRLSVELDTAPTVDLNKLLDEMRCQYETVVANNRRAEEWFAVQTEBLNQQQLSS  
AEELHCCQSEIELDRATANALEIELEAQESLKESECTLSETEDRYSSQLAQMQCLIDNVEIQLAEIRCDLERQNEQYVLLDVKARLECEIAT  
YQSLEENEDCKLPCNPSAPNASCTFCDLSEPFVICTVENCQA

>Platypus\_K33a

MPYNCSLPSFSCRSSCATRPCVPPSCQPCCSLPGARNIPANIGTCGWFCGSEFNGNEKETMQFLNDRNLANYLEKVRQLERENAELEARIRQWCQ  
EQVFFVCSYQSYFRTIEELQKILLTKSENTRLVVQIDNAKLASDDFRTKYQTELSLRQLVEADINGLRRILDELTLCKSDLEAQVESLKEEL  
LSLKQNHQEVENSLKCI GERLNVVEVDAAPTVDLNRVLETRCQYEAALVETNRDVEEWFVKQTEELNQQVVSSEQLQCCQSEIIELRRTVNA  
LEVELQAQHNLNRNSLENTLTETEARYSQLAQVQCMITSVEDQLAEIRCDLERQNEQYVLLDVKARLECEIATYRNLLESEDCKLPSNPCATT  
NACGRAIGPCSVTPCAPCTPCMPRSRCGSPNSFVC

>Platypus\_K33b

MPYNCSLPSFSCRSSCATRPCVPPSCQPCCSLPGARNIPANIGTCGWFCGSEFNGNEKETMQFLNDRNLANYLEKVRQLERENAELEARIRQWCQ  
EQVFFVCSYQSYFRTIEELQKILLTKSENTRLVVQIDNAKLASDDFRTKYQTELSLRQLVEADINGLRRILDELTLCKSDLEAQVESLREEL  
LCLKKNHEEVENSLKCI GERLNVVEVDAAPTVDLNRVLETRCQYEAALVETNRDVEEWFVKQMEELNQQVVSSESEQVQSQSEIIELRRTVNA  
LEVELQAQHNLNRNSLENTLTETEARYSQLAQVQCMITSVEDQLAEIRCDLERQNEQYVLLDVKARLECEIATYRNLLESEDCKLPSNPCATT  
NACSTSCGPRPRCC

>Platypus\_K34

MPYNCSLPSFSCRSSCATRPCVPPSCQPCCSLPGARNIPANIGTCGWFCGSEFNGNEKETMQFLNDRNLANYLEKVRQLERENAELEARIRQWCQ  
EQVFFVCPDYQSYFRTIEELQKILLTKSENTRLVVQIDNAKLASDDFRTKYETELSLRQLVEADINGLRRILDELTLCKADLEAQVESLKEEL  
LCLKRNHEEVENLRCQIGDRNLVEVDAAPPVLDLNRVLETRCQYEAALVETNRDVEEWFVKQTEELNQQVVSSEQLQCCQSEIIELRRTVNA  
LEVELQAQHNLNRNSLENTLTETEARYSQLAQVQCMITVNEVAQLAEIRCDLERQNEQYVLLDVKARLECEIATYRNLLESEDCKLPSNPCATT  
NACGRPIGPCAPNPCAPVCPCTPCVPRSRRCGPTSFVR

>Platypus\_K31

MASPCCRSTVGTGSLRGRFSEARAASMLCTAALANVNRPRVGVTPPLGRPSLCPASCRAACPLPGSCNIPANIGNCGNFCGELINGHEKETM  
QFLNDRNLANYLEKVRQLERENAELETKIREWSKQVFPVCPDYQCFRTIEELQKILCTKSENARLVVQIDNAKLAADDFRTKYETELSLRQL  
VEADIGGLRRILDLLTLAKSDLEAQVESLKEELLCCKNHEQEVHNLQCCQGLDKLRIELDTAPPVLDLNRVLGEMRCQYEAAMVETNRNDVEQWFT  
AQSEGLSMQVMSCSEELQCCQSEIIELELRTVNALIELEAQHKMRNCLENSLESEARYSTELAQMQLISNTEDQLAEIRCDLERQNEQYVLL  
LDVKARLESEISTYRGLLESEDCKLPHPCATPAMCTPCAPPACTPKKPCPSSRSACGPCAPPCC

>Platypus\_K37

MTSSCIRTSGSLSSKSGRPLPGGINISSIDVGGRRPGAGVKAASMCLTAALANVNRPRVGVTPPLGRPSLCPASCRAACPLPGSCNIPANIGN  
GNYGEGILINGHEKETMQFLNDRNLANYLEKVRQLERENAELETKIREWSKQVFPVCPNYQSYFRTVEELQKILCNKAESARLIVQVDNAKLAA  
DFRTKHESELARLKLVEADMSGMHRIIDGTTLAKCDLEAQLESLEKQSLKTNHEQEVHNLQCCQGLDKLRIELDTAPPVLDLNRVLGEMRCQY  
EAMVETNRNDVEQWFTAQSEGLSMQVMSCSEELQCCQSEIIELEKCAVNALEIERQAQHKMRDCLENSLESETRYSTELAQMQLISNTEDQLA

EIRCDLERQNOEYQVLLDVKARLEGEIATYRNLESEDCCKLPNCPCSTPASCSPGPPGTPCGPRPGGAPRPPCGPRPACGGMFASAPKESLVGFSA  
AMLLQFFFEMLKASLLTGK

>Platypus\_K38

MASSTGRPKSCKINPSSRSRSGCGPAEGGRRSGGFLVQSNQPSGSRSGACPIGSCPPNRVQPRPNGSPSGSARSFPVASGRPAIPGPRSRDLPAHA  
GPGGWVGEVLPGGKEKTMQFLNDRNLANYLDQVRQLERANAELAKVSWQACQIPTMCSNYQSYFRTIEELQKILCSKAENARLATDVDNAK  
LAADDFRNKYETELSLRQPLEADIGGLRRILDELTLATCDLEAQVESLKEELLCLRNHEEEVNALRCQLGDRLNIEVDAAPPVDLNRVLEDMRQYEGLVENNRDVE  
CQYEMVESNRNDVEQWFTAQSEGLSMQVMSCSEELQCCQSEIIELRRTVNALEIELQAQQKMRDCLDNTLAETDTRYSTELGQMQLI SKTED  
QLAEIRADLERQNOEYQVLLDVKARLEGEIATYRNLESEDCCKLP SHPCATSSSGPPSGTAPPCCPPRAPGPPSTPRPSGTPRNGHRPGAQCSGR  
SYSSGRF

>Platypus\_K32

MASSFCSTGSKVWARAPSVCSGTGATYRPETYLSYFCQPLGCMSSPCRTGGSLPKSFLATTCRSGSRLPGSCPLPCSVGGSGWYCDASLQGS  
KETMQLNDRNLANYLEKVRQLERENTELDAKIRDSQCTQMPTMGPDYQSYFRTIEELQKVLCTKADNARLVVQIDNAKLAADDFRTKYETELT  
GLLSGNEKVTMQLNDRNLASYLDKVRALAEANADLEQKIRDWHLKQSPSSPERDYSHYKTIEDLRDKI MAATI DNNRVVLEVDNARLAADDFR  
LKYENELVLRQSV EADINGLRRVLDDELTLAKTDLEMQIESLTELAYLKKNHEEEMKEFNSQLVGVQNVEMDAAPGVDLTRVLESEMREQYEA  
MAEKNRDABEAWFHKSKEELSKVASSTELITQTSKTEVTELRRTLQGLEIELQSLSMKAGLEATVAETECRYAMQLQIQGLIGSIECQLSELRS  
EMECQNOEYKMLLDIKTRLEQEIATYRSLLEGGQDSKMPGFTSKNGAGVTTGISGVSAGPGRRPSVEPRRP

>Platypus\_K36

MQFLNDRNLANYLEQVRHLEQENAELEAKIRQWGEAQIPYVCPDYQSYFRTIEELQKILLTKADNARLVQIDNAKLAADDFRTKYETELNLRQ  
LVEADINGLRRLLDELTLCKADLEAQVESLKEELLCLRNHEEEVNALRCQLGDRLNIEVDAAPPVDLNRVLEDMRAQYVESLVENNRDVE SWF  
TTQTEELNQQVVTSSSEQLQCCQAEIIELRRTVNALEIELQAQHMRNSLESTLAETEGRYGSQLAQMQLISNVEAQLAEIRCDLERQNOEYQV  
LLDVKARLEGEIATYRRLLEGEDCKLPHPCTPVPTLRTPTPASQVNTQIRTIIEEIRDGKVISSRELQVHRPM

>Platypus\_K13

MSCRLQTSSSGLGGSCRLGGGRSVSSSSSRFVTSGSGGGMCSGFGGGAGGGFGGGFGGGFGGGACGAGGGFGGGFGGGFDFGGALGGADG  
GLLSGNEKVTMQLNDRNLASYLDKVRALAEANADLEQKIRDWHLKQSPSSPERDYSHYKTIEDLRDKI MAATI DNNRVVLEVDNARLAADDFR  
LKYENELVLRQSV EADINGLRRVLDDELTLAKTDLEMQIESLTELAYLKKNHEEEMKEFNSQLVGVQNVEMDAAPGVDLTRVLESEMREQYEA  
MAEKNRDABEAWFHKSKEELSKVASSTELITQTSKTEVTELRRTLQGLEIELQSLSMKAGLEATVAETECRYAMQLQIQGLIGSIECQLSELRS  
EMECQNOEYKMLLDIKTRLEQEIATYRSLLEGGQDSKMPGFTSKNGAGVTTGISGVSAGPGRRPSVEPRRP

>Platypus\_K19

MAFRARNAYVSTAYGGSGPGRFGGATFRAPSIHGSGGRGVSVSSARFVSSGAGGLGAAFGGGFGGGDLGAGGKATMQLNDRNLASYLDK  
VRALAEANADLEVKIRDWYKQGP GPARDYSAYYRTIEELRDKILGATIENSKLVLQMDNARLAADDFRTKYETELALRMNVETDINGLRRVLD  
ELTLARADLEMQIEGLKEELVYLLKKNHEEEMNALSGQVGGQSVSEVDSAPGVDLQKILTDMDRQYEEEMAEKNRDAEAWFNKTEELTREAVLV  
TEQLQTSKSEVTDLRRTLQGLEIELQSLSMKAALEGTLAETEGRYGVQLAQIQALISSIEAQLGDVRMDSERQNRKYLLMDIKSRLEQEI ST  
YRNLEGGQDAHYTNVPSARGL

>Platypus\_K9

MSSRQSTSYSSSKSRSGGGGGGGGRLLSSSSSVRFSGGGGRFCSSGSSYGGGSFGGGSFGGGACGLGGGSYGSFSGGSMYGGSGCGGFGGG  
YSGGYGGGFGGGAGGGFGGGFGGGFGGGLGGGSGGGFGGGFGGGEDGGLSGNEKVTMQLNDRNLASYLEKVRALAEANADLEQKIHWDYQ  
KQSPSSPTRDYSHYKTIEDLRSQIITTTVENNKIVLAIDNTRMTVDDFRMKYEMELNLRQSV EADVNGLRHVLEELTLRSDEMLQLQSLQEE  
LEALKNHEEEMKQMTGQRSGEVSVEMNAAPSIDLTKALNMDRQYEMELNNAKLNKEIEDQYEAQMNKMHQVTSHSQEIQTSSQVTELRTLQ  
GLEIELQSLSTKAALQSLLEETKGRYCVQLAHIQEIQI GALEAQLSEIRGETECQSQYENVLLDIKARLEQEIATYRSLLEGGQDIGNASGGS  
GRGSGSVLVGGGSGGIRGGSFGGGSGTVGGGSGGSSSFGGGKSSQAQGSVIPQPVPVQHEDRHGSLKRY

>Platypus\_K14

MTSCSRQYSSSSSMKGCGLGGGSSRVSSVLAGGSCRAPSAYGGSGFGGMSVTSRFRSSGGACGVSFGGGYSGFGGGSFGGGLGSGFGGGLGGGF  
GGGLGGGFGGGYGGGFGGGFGGGFGGGDGLLAGGKVTMQLNDRNLASYLDKVRALAEANADLEKIRDWYKQRPTEARDYSPYYKTIEDLRN  
KILATATVDNASVLLQIDNARLAADDFRTKYETELNLRMSVEADINGLRRVLDDELTLARADLEMQIESLKEELAYLRKNHEEEMNALRGVGGDV  
NVEMDAAPGVDL SRVLESMRDQYEMAEKNRDAEDWFFSKTEELNREVASNSSELVQSSKTEISELRRTMQLNLEIELQSLSMKASLEGSLEET  
KGRYCMQLSQIQGLISNVVEQLAQLRCEMEQQNQEYKILLDVKTRLEQEIATYRRLLEGEDAHLSSQHTSSSQYTSQGPQSTRDVTSTSRQVRTI  
VKDVHDGKVVSSHEQVLRTRKN

>Platypus\_K16

MTSCSRQFSSSGSTKGCGLGGGSSHVSSILTGGSCRVPSTCGGSGFKGMSVTSRFRSSGGACGVSFGGGYSGFGGGSFGGGLGSGFGGCGYGGSF  
GGGFGGGFGGGFVMDGGLLAGGKVTMQLNDRNLASYLDKVRALAEANADLEKIRDWYKQRPSEDRDYSPYYRTIEELKNKILITATLENAQP  
LLQIDNARLAADDFRNKYEHVLRQNV EADINGLRRVLDDELTLARADLEMQIEGLKEELSYLKKNHEEEMRALRGVGGDVSVEMDAAPGVDL  
SRILSEMRDQYENLAEKNRDAEAWFLSKTEELNQQVTSNSQQVQSSKSEVSELRRLFQSLIEIELQSLSMKASLEGNLEETKGRYCMQLSQIQ  
CLIGNVEEQLAQLRCEMEQQNQEYKILLDVKTRLEQEIATYRRLLEGEDAHLSSQHTSSSQYLSGQSSTRDSSSRQVRTVVKDVRDQGVVSS  
HEQVLRPKH

>Platypus\_K17

MATTTTTIRQYTSSSSSKAGGLGGGSTRSSCRLPGGFSSSVSSRLVSGGGGGGGYAGYTCSLGGSFGGGLGGGFGGGDGLLAGGKATMQLN  
NDRNLASYLDKVRALAEANADLEKIRDWYKQAPGPARDYSAYYLTIEDLKNKILITATVENANILLQIDNARLAADDFRTKYETELALRMSVEA  
DINGLRRVLDDELTLARADLEMQIENLKEELAYLRKNHEEEMNALRGVGGEINVMEMDAAPGVDL SRVLESMRDQYEMAEKNRDAEDWFFSKT  
EELNREVA TNSSELVQSGKSEISELRRNLQALEIELQSLSMKASLEGSLEQETESRYCVQLSQIQGLIGNVEEQLAQLRCEMEQQNQEYKILLDV  
KTRLEQEIATYRRLLEGEDAHLASQYKPKAEASLTTRQVRTIVEEVQDQGVKVISSREQVHQVTR

>Platypus\_K18

MMNFAPSARSYRSSSSYRNVFRSSGSGPRPSSAASIYAGAGGSGSRVSRVFSVGGPSPARFQPRPGALGSGPGLGLGLAGGPPENDKQKMQG  
LNERLASYLEQVRGLEADNHRLEAQIRQHLDNRAPHTQDWT PFFKTIEDLRAEIFA KSVENANLVNIDNARLAADDFRIKYETELAMRQSVES  
DIHGLRVIDDNTNMNRMQLETEIETLKEELLYMKSQHEVEGLQREIAGSGLTVEVDAPKTQDLGQVMAELRAKYEALAEENRKELDKYWSQQ  
IEESTIVMTSRCEVEEKARGEVTDLRRSLQTLDELDTLRNLKGNLEANLQEVEMRYRLQLDQNALMHLEAELAKVRAECQQQAQDYGALLD  
VKSCLVNEIDMYRKLDDGNDDFSRLDALDSKNSNPGIVHSFHKTTRTVVDGKVVSETSDSKVIRH

>Kiwi\_K12

MALSVRTSGSGFSGGFGSSGSGGFGSSLSGSGGGFGSGLGGSYGSLGSGGGFGSGLGGSYGSLGSGGGGGLGSGFASGSGAGFGGGFGT  
GGGGDGGLLSGSKKEMQNLNDRLAAYLDKVRSLLEEANTDLERKIREWYEKNGPGGGIPGSGNDYSKYYP I IEDLRSKI INATIDNARI ILQVD  
NARLAADDFRLLKYENEVALRQSVADINGLRRVLDLTLTRADLEMQIESLNEELAYLKKNHHEELQGFQGGSTAGQVSVEMDAAPGIDLTKLLN  
DMRGQYEAIAEQNRKEAEAWFNEKSGELKREISTNTEQLQSGKSEITDLKRTLQSLIEIQLSQSLAMKKSLEDTLAEETEGGYCAQLSQIQLQIGN  
LESQFLQVRADMERQNAEYQQLLDIKTHLEMEIETYRRLLDGFEVFKIKTIVEEVVDGKVVXKTRKIKTIVEEVVDGKVVASHVKEVEEKM

>Kiwi\_K20

MAFSSQSSQWGSTPRFYPPTPSVTGLTVRKPATQQFQAPSVMYGGAGGYGTRISTSTNYRQGGGKFSNNFQNLNLTGNDELLTGNEKTTMQLNND  
RLASYLEKVRSLERANSQIEKQIREYYEKNTSDISHDHSYPYFKIIEELQNKIGVAQLENARLVLQIDNAKLAADDFRLLKFENEHLLQLNVQNDI  
NGLFRVRDDTLTKSDLESQIESMNEELVFLKKNHEEEVDRLRKQVGGSVNVEVDAAPGIDLATIMENMRLOQYEGMAEKNREEAKERFEKQIDE  
LNQEVAINTEQLQNKTEITERRQTFQGLELELQSHLNMKKSLEDTLAEETAHYSYQLAQIQEAAANVEAQLRQIRADMAGQNNEYSILLDIKT  
RLEMEIATYRRLLEGEDSGHFQVDIATAEAKELELSKIKKIKTIVEEVVDGKVVSSSEVKEIEEKI

>Kiwi\_K23

MSTSQQPFQFFSGLRSGSGCGLAQQGSYRPSADGGASSTHIPPSSARPLWLATGGGASWGGFGEHHGESIFLGGNEKQTMQNLNDRLAAYL  
DKVRSLAANAQLESCIEQWHKTKSHSKRHDNFQYEQSITDMQRQIEDRKITNASILLQIDNANMASEDFRLKYEAEKSRQGVQFDVENLRKE  
LDNLTIVPTDLEMEIEGLREEHILRRKDHEEDMDAHCSSKDFKVNKNAAPPEDLAKILAEIREDYEALIEKNRKSLSWYKESQAAMSLAAI  
PNPEQLQSSENEIKDLTRTLQSLIEIQLQAMSKKHMLDETLDATRNYALALQNMQQIISKCEELSQVRRDIKHQNNQCKVLLGIKTRLEKEI  
STYRLLLEGNVDGTTKRSESNAKEHAGLTNQKIKAIHVDSVNGQVVSSTINEIHQQA

>Kiwi\_K36L

MTSKHYIQTVSSGSAKSGSCVGGGFTRISSVHSGSSRIPGLSYGMKIVSDTSAKLGPSGLETCLSGSFLPTSYGPGFAGWHDDGGIFNSNEKE  
TMQFLNDRLACYLEKVHLEQENADLERKIRDWYDCQVYVCTDFQAFYKTLEDLQQQILCAKTSNAKLVLQIDNARLAADDFRLLKFESQALR  
QTLEADVSGLRRIIDELTLCRADLEMQLLETKEELLCLKKNHEEEASPLRSQLGTRVNVVEVDAAPSCDLNKVLTIEIRCQYEALEDNRKDVESW  
FCTKMEELNQVIVSSGEQLQHCQTEITDLQRTIQGLEIELETQLSMKSTLECTLQETENRYASQLVQLQSLITSKEAQLAELRCNMRQNEQYR  
ILLDVKTRLECEISTYRRLLDGEDCKIPCFSRLTETAPVSPITTKIRTITEEIKDGRVISSHEQVQHCPPV

>Kiwi\_K15

MTTSFRQSSSSTYGGGFGGGSSSRLCSIRTGGSCRAPS IHGGSGGRGVSVSSARYVSSVSGSYGGGLCSGLSGSYGGGYGGVVALQSLGWG  
ASCDFGGGAGFGGGAGFGGGDLFGGGDGLLSGNEKITMQLNDRLAAYLDKVRALLEEANADLEVKIRDWYQKQAPTS PERDYSHYKI IEDLR  
DKILAAITDNSRIILEIDNARLAADDFRLLKYENELFLRQSVESDINGLRRVLDLTLARADLEMQIETLKEELAYLKKNHHEEMKEYKNLSGT  
VNVEMDAAPGIDLTRILSEMREQYEAALAEKNRKADEAWFFQTDELNREVATHTQQIQTSKSEITELRRTFQGLEIEIQLSQSLMKGLEANLRD  
TESRYCAQLAQIQTITLITNVEEQLSELRCDMERQNEQYRMLMDIKSRLEQEIATYRQLLEGGQDSQMSGWSKEAHLSSGRVIRISMEDSIDGKVV  
TREKFFP

>Kiwi\_K19

MASYSYRQTTSSVSGGLGSSARLGGGFRAPSIHGGSGGRGVSVSSRVFVSSGLGSGVGGGYGSSSFSFGGFGGGYGGCLGSGDGLLSGNE  
KTTMQLNDRLASYLDKVRLLEEANSLEIKIRDWYQKQGGPARDYSYKYTIEDLREKILAAITDNSKIVLQIDNARLAADDFRLLKFETEQA  
LRMSVEADVNLRRVLDLTLARADLEMQLLETKEELAYLKKNHHEEMKALGGQVQVSEVDSAPGIDLSKILADMRDQYEHMAEKNRKDAE  
AWFHKTTEELNREAVANTEQLQSSKSEVTDLRRTLQGLDIEIQLSQSLMKAALENTLADTEGRYGVQLAQIQAALIGNIEAQLAELRADMERQNSE  
YKILMDIKTRLEQEIATYRQLLEGGQESQMFSSLSATADKDGKDLADGKKY

>Kiwi\_K9L1

MSCSIKRTSSISYRSGGGGHCAGSAGRSSASSRRYASSVIGGGSYGGGASSISYGGSLCAGGFGGGMGGGFGGGLGGGFGGGFGGGG  
VFLGGNEKVTMQLNDRLASYLDKVRRLEEENAELEHHIREWYRQKAPSVSKDYSSYYQTIEQLQNIISATVDNNKLLLEIDNSKMTADDFRM  
KYESELVIRQSVADINGLRNMLDELTLVRSSLESELEALQDELIALKRNHEEEMRQLQSQTGGDVSVVNAAPGIDLTKTLNDRNEYEQIIE  
RNRREVEQWYEVKMEEVNRQVTSNEDIQTSSHQLTELRRMQNLEIEIQLQALSTKSSLENSLAETESRYSLLLQIQGQINSVEEELASIRCE  
MEGQNYEYKMLLGIKTRLEQEIATYRALLQEGQDLDLTSQAGVQGGGSSSHSYSSSYSHSQAQYGEKGTGQSRVC

>Kiwi\_K9L2

MSCSIKRTSSISYRSGGGGHCAGSAGRSSASSRRYASSVIGGGSYGGGASSISYGGSLCAGGFGGGMGGGFGGGLGGGFGGGFGGGG  
VFLGGNEKVTMQLNDRLASYLDKVRRLEEENAELEHHIREWYRQKAPSVSKDYSSYYQTIEQLQNIISATVDNNKLLLEIDNSKMTADDFRM  
KYESELVIRQSVADINGLRNMLDELTLVRSSLESELEALQDELIALKRNHEEEMRQLQSQTGGDVSVVNAAPGIDLTKTLNDRNEYEQIIE  
RNRREVEQWYEVKMEEVNRQVTSNEDIQTSSHQLTELRRMQNLEIEIQLQALSTKSSLENSLAETESRYSLLLQIQGQINSVEEELASIRCE  
MEGQNYEYKMLLGIKTRLEQEIATYRALLQEGQDLTASQAGLQGGGRSSSHSYSSASYSHSQSGEMTGQSRVC

>Kiwi\_K9L3

MSCGTSSTSIKIGGGSSGGGGGGCGGGGGGSSGRRSGGYSSVSSRYTSSGGGFGSRSYGGGSRSSYGGGFSSGSCGRISRSSYG  
GRMSGSGFGGGMGSGMGGGFGSGGGGFGGMMGGYGSCLGGGGGFGGGYSGGGFSGGGGFGGGGFGGGGFGGGGFGGGGFGGGGFGGGG  
LLSTNEKLTMQLNDRLASYLDRVGRLEENAEHLERLIREWYRQKQPTGTQKDYSSYYRTIEELQNIIVGASVDLNLKILLDINTRMTVDLDFRLK  
YETEYTLHQSVASDINGLRPLDQLTLARSDELQFESLKEELIYLLKKNHEEEMRGLQTQSGGDVNVENATPGINLMEKLNEMRCEYERLIEN  
NRREVESWYETKMEEVNQVHSSGQEIQSSNQI SELRREYQSLIEIQLSQISMVDSLQSNLEDTERRYNMQLQIQGMIGPLEEELASIRCEM  
ESQNEEYKMLLGIKTRLEQEIATYRALLQEGQHNIITIPGGMGGMGGMGGGRI GGGYSSGGGSGGGSGGSGGSGGSGGSGGSGGSGGSGG  
GGSCGI GGGAGAGLGGSGGGCITGGGGGGISGVSSSHSSYSSSSQSQSCSGGTQYGRKSF

>Kiwi\_K9L4

MSSGFYGGMSSGGYGGRMSSGGYGGMGCGSMGGGFGSGGSGFGGGYGGSGFGGGGGGFGSGGSGGGGNTGFLSNDEKLTMQLNDRLAS  
YLDTVRNLKENTQLEQLIREWYKQGPAGKDYSHYYGTIEDLQNLVTAAVETNRMLLDLNDTRMTAEDFRIKYETEYGLRQSVADINQLR  
PLMDNLTGRSDLEMQFESLKEELISLKNHEEEMKSLQTSQSGDVNVENNAAPGEDLLKKNLDMRQEYESIQKNREEVERWYKMEEVSSQ  
VHSSGQBLESSNQIISALRREYQSLIEIQLSELMSVNSLQSNLEDTERRYNMQLQIQGMIGPLEEELASIRCEMESQNEEYKMLLGIKTRLEQ  
EIAQYRALLEEGQHNIITTSQGGAGDGSASGRRHGGISYSSGRGTSGGSSWSSGGGSSGGRSMESGYGRTSGGGSGGIRGACGRISGGGG  
SGGGGGKSLSHSSSSHSQSGNSCESQGGPLKLCLEGNKTLERGATMEEVSEAIKTMKSGRMEWDLGI IQFGNSKLAETLQIRAGKISATLQVL  
QAASAPAHNRPTLRRANQLLPTSHRQAGSRPTISEACKSSEELRPAGAFPCRNDLPPCKTLQEKWMPLSYNTVVVVTSTRHGLVFLQAGIQAC  
MSHFPGYCANQSCSDGRAVVDASDLERIWDSLQMD

>Kiwi\_HAS1

MSCNIKETITVSSKGRSSGGSCIGGGGGGARISSYIGSGRGSRSYCGGVNYGGGLSVGSLAGGSYGGGNCYGNLGLFGLGGVGVVGGGLG  
GDCLLSSCDEKVTMQLNDRLASYLKVKCLEKENAELECRIREWYATQGLSCEPRDYSYKYI IEDLQNIIVCATIDNNKIIILDIDNSRMAAD

DFRVKYETELALRQGV EADINGLRQVLDQLTLCRSDLEAQL ELSREELCCLKKNHEEEMNCLRKQSTGDVSV EVNACPGPDLRQI LEDLRCQYE  
TLIARNRKEVEDWYECKIEEVNREVITSQGVEVETCNNQVTELRRQLQALEIDLQALQSQRNNLESSLAETECQYNTLLGELQNIQITVEQQALAE  
IRAEIECQNQEYKTLLDVVKCRLEQEIQTYRCLLEGGQQDLIHGGGIGVGTGVGGVIRTSHTYTTTSSSHCQPQVPPCKTGDIIQVTCRRICD

>Kiwi\_HAS2

MSCTIKQTTSGLRGRTSGGSCVIGGGGSGGVRISVSSGRYTTTCGIGGSRGFSGRSYCGGVNYGGGLSTGSLVGGNYGGGLGAGVLGGC SGIG  
FSGGSVRFGGGIGGGIGGGIGIGLGGGVAGGGFSGDGI LLSGDEKVTMQLNDRLASYL DKVRCLEQENADLECRIREWYAKQGPFCPRDYSC  
YYKEIEDLQNIQVATIDNNKII LNIDNSRMTADDFRVKYETELALRQGV EADINGLRQVLDQLTLCRSDLEAQL ELSREELCCLKKNHEEEMC  
CLRKQATGDVSV EVNACPGPDLRQI LEDLRCQYETLIERNRKEVEDWYECKVSEISSALTFPG

>Kiwi\_HAS3

MGKQLNAGSGTGGSF GATQQACPTFFGSGGSICTRGLGGGFTRANAGCGEGILLANNEKATMQLNDR LASYL DKVRLLEGENTDLECKIREWY  
AKVGPSCPRDYSCFHKEIDDLQNIQILCAAMEANKIVLNI DNNRMTADDFRVKYETEC SLRQNV DADL CNLRPILDQLASCKTDLQLQFEALTE  
EMCCKLTNHEEEMSLRKQATGNVSV EVNACPGPDLRQI LEDLRCQYETLMERNRKE TEQWYACKVEEVNLEVITSSQIE SNNKQVTELRRQL  
QALQINVQAQLNMKENLESSLAETECHYKNYLAELQSQISCV EQLRAEIRAEMECQNQEYKTLLDVVKCRLEQEIQTYHCLLEGGQQDIVYADYR  
QTRA

>Kiwi\_K14L1

MATTVRQYSSSTSLKGF GGGSSRLSSARLGGGYRAPSLSGRASSYSVSSRTV SGLGSLGGGFGGTYCSSIGGGLSGFGGGYGGSFSGSGFS  
FGGGYGGSFSGFGGGFGGGYGGSFSGGEGILQAGEKATMQLNDR LAAYL DKVRALEEANTDLEVKIREWYKQAPGPRDYSPYYRTIEEL  
RSKVLVTVDNANLLQIDNARLTADDFRTKFETE QALRLSVEADINGLRRVLDDELTLARADLEMQIENLKEELAYLKNHEEEMNAMRGQVGG  
EISVEMDAAPGIDLTKILTEMREQYETLAEKNRRDAEQWFFSKTEELNREVAINTEQLQSGKTEITELRRTIQSLEIDLQSQSFSTKALESSLA  
DTEARYGTQALQQLV LITSVEEQLAELRCDMERQNHRYRLLDVKTRLEQEIATYRRLLEGEDAHMTSHMREVPVTRQIR TIVEEVQDGKVIS  
SREQVQSPR

>Kiwi\_K14L2

MATTVRQYSSSTSLKGF GGGSSRLSSARLGGGYRAPSLSGRASSYSVSSRTV SGLGSLGGGFGGTYCSSIGGGLSGFGGGYGGSFSGSGFS  
FGGGYGGSXPSSTIVFLGPMCVQGF CARMVTQPVCLYHGTRETANVCTRGLPCCTRCLAQAQEP LPSLAMATTVRQYSSSTSLKGF GGGSSR  
LSSARLGGGYRAPSLSGRASSYSVSSRTV SGLGSLGGGFGGTYCSSIGGGLSGFGGGYGGSFSGSGFGGGFGGGYGGSFSGGEGILQA  
GEKATMQLNDR LAAYL DKVRALEEANTDLEVKIREWYKQAPGPRDYSPYYRTIEELRSKILAAATVENANIVLQIDNARLAADDFRTKFETE  
QALRLSVEADINGLRRVLDDELTLARADLEMQIENLKEELAYLKNHEEEMNAMRGQVGG EISVEMDAAPGIDLTKILTEMREQYETLAEKNRRD  
AEQWFFSKTEELNREVAINTEQLQSGKTEITELRRTIQSLEIDLQSQSLSTKALESSLADTEARYGTQALQQLV LITSVEEQLAELRCDMERQ  
HRYRLLDVKTRLEQEIATYRRLLEGEDAHISSQYSSAMSSHSGRDVMTTSRQVRTIVEEVQDGKVVSSREQVALTTR

>Kiwi\_K18

MSFSRSTVYSSSYR PVSSQSI VSTRFPPLSSAASVYAGAGGSGSRISISRTSSLSSGGIYEARI GGYGAGIGGYGARMSSLLSGSGV VQN  
EKETMQDLNDR L ATYLDKVRSL EQENHLEIQIRDFMQKKGPSHSHDWSHYWEVIEDLRSKIFD ATVDNARTVLQIDNARLAADDFRVKYEAELA  
IRLSVENDIMGLRKVIDDTNMARLQLEGEIESLKEELIFMKNHHDVKS LQAQIANSVLTVEVDAPK SQDLGKIMAEIRAQYDALAQKNLEDL  
EKQWQQITESTIEITQSKEVDTAHTAVELRRTVQLEIDL ELSLRNQRGGL EASLLEVENRYAMQELNGLILRVEAELTQVRGELQRQAE  
EYQALLNIKDKLEAEIATYRKLIEGGEEFSLRDALEKETTTSTVQRSTQKIVDGVVSETKELKVRTY

>Ostrich\_K222

MELSQLNEIRANYETLITRNQIKII ISTRTQLEEATI KRMDRDAEALKAARAE LSEARRQWHHMOMEIESLHAVEKGLERSLRATEQQYHMQ  
LNEAEIESLEKELQEVRRGIEKQLQEHEILLNTRMKLEEEIATYRSLLEQEENRFRCSIPDQKDDKPTTSKIAFTLPSSGVKRETEKVELV  
SKQAILDGNIMKESAEAHGTIQTEKVDEVIKEWEGSF FKNPRLRKKSVSLRFDLHLAATDEGCLHTKQKTLPIEVRLVMRRSCSIPSIKP

>Ostrich\_K12

MAFSGRTSGGSRQFSSRSGLGGGSMRMSSSSSGGGFGGSGFGFGSGSGGFGAASMLGSGSGFSGGFVSGSGGGFGSSSLGSGFGGGFGSGLGG  
YSGSLGSGFGGGFGSGSGSGTGF GGSFGTGGGGSGGGDGLLSGSKKETMQLNDR LAAYL DKVRSLEANNDLERKIREWYKNGPGAGI  
PGSGNDYSKYYP IIEDLRNKIINATIDNARIILQVDNARLAADDFRLKYENEVALRQSV EADINGLRRVLDDELTLTRADLEMQIESLNEELTYL  
KKNHEEELQGFQSGTAGQVSVEMDAAPGIDLTKLLNDRMRGQYEVIAEQNRKEAEAWFNEKSGELKREISTNTEQLQSGKREITDLKRTLQSL  
EIQSLAMKKSLEDTLAETEGGYCAQLSQMLQIGNLESLELQVLRADMERQNAEYQQLLDIKTRLEMEIETYRRLLDGESAGQGVTFESSPLTG  
SKSQTSQSLDSSQDPTKTRKIKTIVEEVVDGKVVASHVKEVEEKI

>Ostrich\_K20

MAFSNRSFQRGSSSHFHPAPVSVGLTVRRTAIQKLAQPSVYGGAGGYTRISTSTNYGQFGGKFSNNFQLHITGNDEL LTGNEKTTMQLNDR  
RLASYLEKVRSL EKANSQIEKQIK EWEKNTSDIRHDSPYFKI IEDLRNKIGVAQLENARLVQIDNAKLAADDFRVKFENEHLLQSVQNDI  
NGLLRVLDLTLTKSDLESQIESVNEELVFLKKNHDEEVDRLRKQVGGTVNVVEVDAAPGINLATIMENMRKQYEEAEKNREEAKEQFEKQTED  
LKQEVAINIEQLQSQKREITERRQTFQGMELQLQTHLNMKKSLEDTLAETEARYSHQLAQIQEAVANLEAQLRQIRADMAAQSN EYVLLDIKT  
RLEMEIATYRRLLEGEDSGCGSGTKLSKIKKIKTIVEEVVDGKVVSSQINEIEEAI

>Ostrich\_K23

MSISQPFQFFSGSLRGSSCGGLAQGGSSYRPSADGGASSTHLSFSSARPLRLATGGGAPWGGFGEHHGESIFLGGNEKQTMQLNDR LAAYL  
EKVRSLEAANAQLES CILEWHKTKSHSKRHDNFNYEQSVTDMQRQIEDGKITNASILLQIDNANMASEDFRLKYEA EKSRRQGVQFDVENLRKE  
LDNLTIVTTDLEMEIEGLREEHILRRKDHEEDMDAHRSSQDFKVNKVNAAAPPENLAKILAE LRDDYEAIEKNRKSLSWYKEQSAAMSLAAI  
PNPEQLQSSENEIKDLTRTLQSL EIELQAQMSKHMLEDTLADTRNYALALQNMQQIISKCEEELSQVRHDIKHQNNQYKVVLLGIKTRLEKEI  
STYRLLLEGNVDGTTTRKSESNIKGSPLFGSL

>Ostrich\_K15

MTTVYRQSSSSTYGGGFGGGSSSSRLSSIRTGGSYRAPSIIHGSGGRGVSVSSARYVSSVSGSGFGGGLCSGLSGYGGYGGGSGALQSGFGWG  
AASGFGGAGFGGGLDFGGGGLSGNEKITMQLNDR LAAYL DKVRALEEANADLEVKIRDWYKQAP TSPERDYSHYKIIEDLRDKILAAI  
IDNSRIILEIDNARLAADDFRLKYENELFLRQSVESDINGLRRVLDDELTLARADLEMQIETLKEELAYLKNHEEEMKEYKNQLSGTVNVEMDA  
APGIDLTRILSEMREQYEA LAEKNRKA EAWFFQTDELNREVAHTTQIQTGKSEITELRRTFQGLEIELQSQLSMKAGLEANLRDTEARYCA  
QLAQIQALITNVEEQSELRCDMERQNE YRMLMDIKSRLEQEIATYRQLLEGGQDSQMSGWSPKDDSI AVSLPDPFSDIARNIAYLFDSHAETES  
PFLLESHILCAKTNNAKLVLQIDNARLGADDFRTKIPCFPRVTD SAPVSQITTKIRITIEEIKDGRVISSHEQVQHCPP I

>Ostrich\_K19

MASYSFRQTTSSVSGGLGGSSVRLGGGSFRAPSIHGGSGGRGVSVSSARFVSSGLGSGVGGYSSFSNSFSGGFGGCLGSGDGLLSGNEKTTM  
QNLNDRLASYLKVRLEEANSLEIKIRDWYQKQGGPARDYSFYKTIEDLREKILAATIDNSKIVLQIDNARLAADDFRTKFETEALRMS  
VEADINGLRRLVDELTLARTDLELQIENLKEELAYLKKNHHEEMSSALGGQVAGQVSVSEVDSAPGIDLKILADMARDQYEHMAEKNRKDAEAWFO  
NKTEELNREVAVNTEQLQSSKSEVTDLRRRLTQGLDIELQSQLSMKAALENTLADTEGRYGAQLAQIQALIGNMEAQLAELRAEMERQNSEYKIL  
MDIKTRLEQEIATYRQLLEGQESQ

>Ostrich\_K9L1

MSCSIKRTSSTSYRSGGGAGLCGGSSRSVSSARRYASSVIGGGSYGGGACISYGGPVCAGSLAGGFGGGLGAGFAGLGAGFAGGDDVILS  
GNEKVTMQLNLERLASYLKVRLEEENAQLEHYIREWYRKQAPSVDYTSYYQTIEQLQNQIISATVDNNKLLLDIDNSKMTADDFRMKYEN  
ELVIRQSVVEADINGLRNLLDDTLVRSLSLESELESKDELMAKRNHEEEMRQLQSQGTGGDVSVEVNAAPGEDLTKTLNDRNEYEQIIEERNR  
EVEQWYEVKIEEVNQVTSSSQDIQTSSSHQLTELRRMQNLEIELQAQLSTKNLENSLAETESRYGCLLQIQQINSVEEELASIRCEMESQ  
NQEYKMLLGKIKTRLEQEIATYRALLQEGQQDIVVSVQAVQGGGSSSHSYSSSTSYQYDGTGQSRVC

>Ostrich\_K9L2

MSCSIKRTSSTSYRSGGGAGLCGGSSRSVSSARRYASSVIGGGSYGGGACISYGGPVCAGSLAGGFGGGLGAGFAGLGAGFAGGDDVILS  
GNEKVTMQLNLERLASYLKVRLEEENAQLEHYIREWYRKQAPSVDYTSYYQTIEQLQNQIISATVDNNKLLLDIDNSKMTADDFRMKYEN  
ELVIRQSVVEADINGLRNLLDDTLVRSLSLESELESKDELMAKRNHEEEMRQLQSQGTGGDVSVEVNAAPGEDLTKTLNDRNEYEQIIEERNR  
EVEQWYEVKIEEVNQVTSSSQDIQTSSSHQLTELRRMQNLEIELQAQLSTKNLENSLAETESRYGCLLQIQQINSVEEELASIRCEMESQ  
NQEYKMLLGKIKTRLEQEIATYRALLQEGQQDIVASQGTQGGGSSSHSYSSASYSQSQSGDVIDRCRQ

>Ostrich\_K9L3

MSCGKSTSTIKIGSGGSGGGGGGGYGGGGGGSSGCRSGGYSSVSSRRYTSSGGSGGFSGRSFGGGGSRSTYGGGFSSGSCGRISRST  
YGGRMSGGSGGGGLGCGSMGGGFGSGGGGGTGGGYSSLGGGGFGGGYSGGGFSGFGGGGSGGGSGFGGMGLGEDTGLLSTNEKLTMQNLND  
RLASYLDKVRGLEEENAHLERLIREWYQKQPTGTDKYSQYYRTIEELQNQIVGASVDLNKILLDIDNTRMTVDVDFRLKYETEYTLHQSVASDI  
NGLRPLLDQLTLARSDELTFESLKEELIYLKKNHEEEMRGLQTSQGGDVNVEVNATPGINLMEKLNEMRCEYERLIENNRREVSWEYTKMEE  
VNQQVHSSGQEIQSSNQISELREYQSLEIELQSQISMVDSLQSNLEDTERRYNMQLQIQGMIGPLEEELASIRCEMESQNEEYKMLLGKIKT  
RLQEQEIAQYRALLEEGQDLTIPIGGGLGGGLGGMGGGRLGGGGYSSGGGSGGGGSLGGYGGGGSISGSGMGGMGGGGMGGGSGGGSGC  
IIGGGGGGLGGGSGGGSSIVGGGGGRLSGGVSSSHSYSSSSQSQSCGGGTQGHGRKSF

>Ostrich\_K9L4

MSCGSKQTSSKSLRSGSGGSASSCGGGGSKYSVSSRRHTSSRSVSGGGRISGSSCGGGSSRSYGGGMSGMSSSCYGGGMSGGYGGRMCGC  
SMGGGFGSGGSLGGGYGNGFGGGGGFSGGGFSGGSFSSGGFGGNGMFLSNDEKLTMQNLNRLASYLDTVRNLEKENIHLEQLIREWYQKQ  
GPTGTDKYSHYGTIEDLQNLVTAAVETNRMLLDLDNTRMTAEDFRKYEYETGLRQSVVEADINGLRNLLDNLTLGRSDLEMQFESLKDDELIG  
LKKNHHEEMKSLQTSQSSGDVNVEVNAAPGEDLLKELNDRMKEYESIIQKNREEVETWYESKMEEVSQVHSSSQELESSNQIISALREYQSLE  
IELQSELMSVLDLEEDTERRYNMQLQIQGMIGPLEEELASIRCEMESQNEEYKMLLGKIKTRLEQEIATYRALLEEGQHNIITSSQGGGGG  
SAGGGRHGGISCSGRGSTGGGSSWSSGGRSSGGRSMEEYGRSTTGGGESGGGIRGGASGRISGGGDSGGGGEGKSCLSPSSSSQSQSGYSC  
ESEGKKNKRLCLQGNKILERGATMEEVSEAIKTMKLSFRKSEN

>Ostrich\_HAS1

MSCNIKETITVSSKGRSSGGSCIIIGGGGARISSYIGSGRGSRSYCGGVNYGGGLSVGLAGGSGYGGGSCYGNLGFGLGGVGVVGGGLGGD  
CLLSSCDEKVTMQLNDRLASYLKVKCLEKENAELECRIREWYATQGLSCEPRDYSCYKEIEDLQNLQIVCATIDNNKILLDIDNSRMAADDF  
RVKYETELALRQSVVEADINGLRQVLDQLTLCRSDLEAQLSLESLREELCCKKNHEEEMNCLRKQSTGDVSVVEVNACPGPDLRQILEDLRCQYETL  
IARNKEVEDWYECKIEEVNREVITSGQEVETCNQVTELRRQLQALEIDLQAQLSQRNLESSLAETECQYNTLLGELQNQITCVEQQLAEIR  
TEIECQNQEYKTLLDVCKRLEQEIATYRCLLEGGQDLIHGGGIGVGTGVGGVIRTSHYTTTTSSSHCQPQVPCKTGTIDQVTCRRICD

>Ostrich\_HAS2

MSCSIKQTTGSLRGRSSTGGSCVIGGGGGVRISSVSSGRYTCGIGGSRGFSRSYCGGVNYGGGLSTGSLVGGNYGGGLGAGVLGGCSGIGF  
SGGVSFRGGGIGGGTIGVGGVAGGGFSGDGIILSGDEKVTMQLNDRLASYLKVRLEQENADLECRIREWYAKQGFPEPRDYSCYKEI  
EDLQNLQIVCATIDNNKILLDIDNSRMTADDFRVKYETELALRQSVVEADINGLRQVLDQLTLCRSDLEAQLSLESLREELCCKKNHEEEMNCLRKQ  
ATGDVSVVEVNACPGPDLRQILEEMRCQYETLIERNRKEVEDWYECKIEEVNREVITSGQEVETCNQVTELRRQLQALEIDLQAQLSQRNLEA  
SLAETECRYNNHLAELQSQITCVEQQLADLRAEMECQNQEYKILLDVKRLEQEIHTYRCLLEGGQDLIQGGIGQSSGLGGVARTSGVGGG  
SIIRTSHTYTSSSQMPSCAAAEIQVPCRRICD

>Ostrich\_HAS3

MQLNDRLASYLKVRLEGENADLERKIREWYTKVGPSCPEQDYSCFHKEIDDLQNLQILCAAMEANKILLNTDNNRMTADDFRVKYETEGLR  
QNADADICNLRPVVDQLASCKTDLQFQFEALTEEMCCLKTNHEEEMSLRKQVTDVSVVEVNACPGPDLRQILEDLRCQYETLMERNRKEETEOW  
YACKVEEVNLEVITSSQEIENKQVTELRRQLQALEINVQAQLNMKENLESSLAETECRYNKYLAELQSQISCVQWLAEIREEMECQNQEYK  
TLLDVKRLEQEIATYRCLLEGGQDIVYADYRQTRA

>Ostrich\_K14L1

MATTVRQYSSSTSLKFGGGLGGSSRSLSSVHVGGGGYRAPSVSGRSTSSYSVSSRTVSGLSALGGYGGSYCSSVGGGLGSGFGGGYGGSGFGSG  
FGGGFGGGFGGGVGGGEGILQAGEKETMQLNDRLAAYLDKVRLEEANTDLEVKIREWYKQAPGPDRDYSPYKTIIEELRSKILAAATVENAN  
IVLQIDNARLAADDFRTKFETEALRRLSVEADINGLRRLVDELTLARADLEMQIENLKEELAYLKKNHHEEEMNLRGQVGGEISVEMDAAPGID  
LTKILAEEMREYETLAEKNRRDAEQWFFSKTEELNREVAINTEQLQSGKTEITELRRTIQSLEIDLQSLMSKAALEGTLADTEARYGTQLAQL  
QGLITSVEEQLAELRCDMERQNHDIRILLDVKTRLEQEIATYRRLLEGEDAHISSQYSSAMSSHSGRDVMTTSRQVRTIVEEVQDGKVVSSREQ  
VALTTR

>Ostrich\_K14L2

MATTVRQYSSSTSLKFGGGLGGSSRSLSSVHVGGGGYRAPSVSGRSTSSYSVSSRTVSGLSALGGYGGSYCSSVGGGLGSGFGGGYGGSGFGSG  
FGGGFGGGFGGGVGGGEGILQAGEKEKTKNVNDRLAAYLDKVRLEEANTDLEVKIREWYKQAPGPDRDYSPYKTIIEELRSKVLVATVDNAN  
LLLQIDNARLTADDFRTKLETEALRRLSVEADINGLRRLVDELTLARADLEMQIENLKEELTYLKKNHHEEEMNLRGQVGGEISVEMDAAPGID  
LTKILAEEMREYETLAEKNRRDAEQWFFSKTEELNREVAINTEQLQSGKTEITELRRTIQSLEIDLQSLMSKAALEGTLADTEARYGTQLAQL  
QGLITSVEEQLAELRCDMERQNHDIRILLDVKTRLEQEIATYRRLLEGEDAHMSSHYASQSVREAPVTTTRQIRTIVEEVQDGKVISSREQIHQSP  
R

>Ostrich\_K18

MGGSLLSGSGMVQNEKETMQDLNDRLATYLDKVRSLQENHKEIQIRDQKQKGPSSRDWSHYWEVIEDLRNKIFDQATVDNARTVLQIDNAR  
LAADDFRVKYEAELAIRLSVENDIAGLRKVIDDTNMRALHLEGEIESLKEELIFMKNHEDEVKSLQAQISDSALTVEVDAPKSDLGKIMAEI



RAQYDALAQKNLEDEKQWGGQITESTIEITQSSKDVDTARSTVVDLRRTVQTLIDLESLRNQKAGLEANLLEVENRYAMQMEQLNGLILRVE  
AELAQVRGELQRQAEYQALLNKKKLEAEIATYRQLLEGGEFSLRDALEKETSTVQTSTQKIVDGKVVSETKEVKVRY

>Zebra\_finch\_K12

MALSVRTSGGPRQFSSRSRGGGSLRISSSSGGGGFGGSLGFGGGSGGGFGAASLLGSSSGFGGGFGGGLGGSYGSLGSGFGGGLGSGFGSS  
SGAAFSGFGGGLGTGFGGGFSPAGAGDGGILSGSKETMQLNDRLAAYLDKVRSLLEDANTELEKIREWYEKNGPGTGPSSGNDYSKFYPL  
IEDLRNKIINATIDNARIILQVDNARLAADDFRVKYENEVALRQSSVNEADINGLRRLVDELMTMRADLEMQIESLNEELAYLKKHHEEELQGIQS  
SELGQVSVEMDAPGTDLTKLLNDRMGQYEVIAQDNRKEAEAWFNEKSGELKREISTHTEQLSGKSEITDLKRTLQSLIEIQLSOLAMKKSLE  
DTLAETEGGYCAQLSQIQMIGNLESQLFQVRADMERQNAEYQQLLDIKTRLEMEIETRYRLLDGEFVSAQAATFESSLTGSKSQTQSLDSS  
QDPTKTRIKTIVEEVDGKVVASHVKEVEEKI

>Zebra\_finch\_K20

MAFSTNSTQWSTSSRVQSPAPSVSSTSRKMSIQKIQAPSVYGGAGGYTRISASTSPGQGLRGLSGLSITGSDVLLAGNEKSTMQLNDRLA  
YLERVRSLEKSNLSIERQIREWYEKNTTSIGQDYSSYFKTIDELRNKISAAQMENSRLVLQIDNAKLAADDFRLKFENEHLRQSVESDITGLL  
RVRDDLTLTQADLWESQIENITDELVLFLRKNHEEDRDLRREASSVNVAVDAAPGIDLAAMENMRKQYEEMAEKNRQEAKEHFQKQTAELNQS  
VALNIEQLEVQRKEITERRQVFNLELELQSLTMTKQTLGTLAEATEARYSYQLDQIQGAISSLEAQLRQLRADMEANSEYSILLDVKTRLEM  
EATYRRLLEGEESGHLEEISLAVDAEKESKFKKIKTIVEEVDGKVVSSSEVREFEEMK

>Zebra\_finch\_K23

MQAHKCFRIDQEARFVMTQSCCCHSSKGNHRKRAKAAQRRRGCSVLGSGTWSGIHTGLSMSTSQGPFQQLFSGSLRGSAGGLAQGGTSYR  
ASSADGGASSTHPFSSARPFWLAAGGAPWGGFGEHYGESIFLGGNEKQTMQLNLERLAAYLDKVRALAEANAQLESCILEWHRTKSHGKRHDFN  
QYEQNVDTMQRQIEDSKI TNASILLQIDNANMATEDFRLKYEAERKRRQGVQLDVENLRKELDGMTIITTDLEMEIEGLREEHILRRKDHEEDM  
KVLAEEMRQYEALEKRNKDAEAWFFTTDELNREVAHTQIQITGKSEITELRRTLQSLIEIQLSOLSMKAGLEANLRDTEGRYCAQLAQIQV  
KHMLDTEADTRNYAAALQNMQQIISRCEELSQRVHDMKQNNQYKVLGKIKTRLEKEISTYRLLLEGNADGTARKSETKEHSGLSNRKRLA  
IVHDSVNGEVVSS TINELPPQA

>Zebra\_finch\_K15

MATSFMSSTSTYGGFGGAGGSSSRLLSVRVGGTCRAPSIHGGSGGRGVSISSARYVSSSGGCGFGGGYGGGFGGAVCGFGGSGFGGSGF  
GGGFDFSGGAVAGDGLLSGNEKITMQLNDRLASYLKVRALAEANSELEVKIRDWYQKQAPTS PARDYSNYKIMEDLDRKILAAITIDNSRVI  
LEIDNARLAADDFRLKYENELFLRQSVESDINGLRRLVDELTLRSTDLLELQIETLKEELAYLKKHHEEMKEYSKQLSGTVNVEMDAAPGIDLT  
KVLAEEMRQYEALEKRNKDAEAWFFTTDELNREVAHTQIQITGKSEITELRRTLQSLIEIQLSOLSMKAGLEANLRDTEGRYCAQLAQIQV  
LITSVEEQLAELRCDMERQNEKMLMDIKSRLEQEIATYRQLLEGQDSQLSGLNPKDAFGSSGRVRSAGDDVRSRSTDRRNQ

>Zebra\_finch\_K19

MASYSFRQTSSMAGGPGASSLRFGGFRAPSIHGGSGGRGVSVSSARFVSSGLGSLGGYGGGSGFSSFSYGGGLGGDGLLSGNEKATMQSL  
NDRLASYLEKVRALAEANSDLETKIRNWKQKQGPS PARDYSPYFKTIEDLRDKILDATIDNARIVLQIDNARLAADDFKTKFETEQLRMSVEA  
DINGLRRLVDELTLRDLLELQIEGLKEELAYLKKHHEELSTLRGQVAGQVSVELDSAPGIDLSKILADMRDQYEHMAEKRNKDAEAWFHSKT  
EELNREVAVNTQEQSSKSEVTDLRRTLQGLEIQLSOLSMKAALEGTADTEARYGAQLAQIQGLVGSIEAQLAELRADMERQNTYKILMDI  
KTRLEQEIATYRQLLEGQESQMFGLSLGTADKRDKH

>Zebra\_finch\_K9L1

MSCSIKRTSSTSYRSGGGGGGACGGSSMSCRRYASSVIGGGSYGGAAACGGYGGGLSMGSLSMGSLGGGFGGGSAGICGPGDGLLSGNEKVT  
MQLNDRLASYLKVRALAEANAQLEHHIREWYRQKQAPSVKDYSSYQTI EQLNQIIISATVDNRMILDDIDNSKMTADDFRMKYENELGIRQ  
TVEADINGLRNILDGLTTTRSALECELESLRDELIALKRNHEEMRQLQSQGTGDVSVVNAAPGEDLTKILNEMRDEYEQIEKNRREVEQWY  
EVKIQEVNQVTSSSQDIQTSSHQTELRRMQNLEIQLAQQLSTKSSLENSLAETESRYGRMLQQIQAINCIEBELASIRCEMGGQSQYKYM  
LLGIKMRLEQEIQQYRALLQEGQDGLVSGQAFQGGGKSSQSYASYSHSQCQDMSSGQSRVC

>Zebra\_finch\_K9L2

MSCSIKRTSSTSYRSGGGGGGACGGSSMSCRRYASSVIGGGSYGGAAACGGYGGGLSMGSLSMGSLGGGFGGGSAGICGPGDGLLSGNEKVT  
MQLNDRLASYLKVRALAEANAQLEHHIREWYRQKQAPSASKDYSSYQTI EQLNQIIISATVDNRMILDDIDNSKMTADDFRMKYENELGIRQ  
TVEADINGLRNMLDDTLVRSLSLESELSKDELIALKRNHEEMRQLQSQGTGDVSVVNAAPGEDLTKILNEMRDEYEQIEKNRREVEQWY  
EVKIQEVNQVTSSSQDIQTSSHQTELRRMQNLEIQLAQQLSTKSSLENSLAETESRYGRMLQQIQAINCIEBELASIRCEMGGQSQYKYM  
LLGIKTRLEQEIQQYRALLQEGQDGLVSVQAFQGGGKSSQSYASYSHSQCQDMSSGQSRVC

>Zebra\_finch\_K9L3

MSCGTSSTSTIRISSGGGGGGGGGRCSSGGGGGGGSGGYSMSRRYTSSGGSGGFSGRSFGGGGSRSSYGGGFSSGCGRISRSSYGGRMS  
GGSYGGMSSCGMGGGLSGGGGFGMGGYGGGGYGGGFSFGGSGGFGGGSYGGGFGGGMFGDSSGLLSTNEKLTMQNLDRLASVMDK  
VRRLEEENSQLEQLIREWYKQAPSQSKDYQYRTIEELQNIQVGNVLDLNRMLLDMNTRMTVDDFRLLKYETEYTLHQSVASDINGLRPLLD  
QTLRSRDLQFESLKEELIFLKKHHEEMRGLQGSQGGDVNVVNAATPGINLMEKLNEMRCEYERLIENNRKEVESWYETKMEEVNQVHTS  
GQEIQSSNQIISLRLVQINTAPGEDLTKLKNEMRQYEAIIQKNRAEVEKWEYSKMEEVQVHSSSQEIESSNQIISVLRREFQSLIEQLSQI  
YRALLEEQDQDLVPIPAGMGGMGGMGGMGGGRIGSGGYSGGGRRGGGMSGGYGGGSGMGGMGGGSCGGMGGGSGGGMGGGSGGGMGG  
GSGGMGGSGGGGIGGGGGRTSGGVSSSHSYSSSSQSQSCRGSESQYGRKSF

>Zebra\_finch\_K9L4

MSCGSKQPLKSCLRGSSGGGSSYSSASRTVTSRTSGGGRFSGSSCGGGSSRSCAGGSAYGRSSYGGMSSSSWGGRLGGACHGGMGHSS  
MGTGFRSGSGFGGGYAGFGGAVGFGSGSFGSGGFHGGNVGILSYDEKLTMQSLNDRLASVYMETVRNLEKENAQLEQLIREWYKQGP IGPDK  
YSHYGGQIEELQKQIMAAAVETHKVLDDLNTKMTAEDFRIKYEMESGLRQNVEGDLNLSRPLLDNLTLTKSDLEMQFESLKEELIDLKKHHEE  
EMKLLQSSNGDVNVQINTAPGEDLTKLKNEMRQYEAIIQKNRAEVEKWEYSKMEEVQVHSSSQEIESSNQIISVLRREFQSLIEQLSQI  
SLIDSLQSNLEDTERRYNMQLQIQAMIGPLEEELASIRCEMESQNEEKMLLGIKTRLEQEIQQYRALLQEGQHGISTSQGAGGGSSGGGGH  
GSSGGGSCWSSGGRSSGGKTTGGSYGRSSSSSSGGGGSGGRTGGGTCGKTSGGGGSSGGGGKSCLSRSSSSSQSQPGDSCESPGLRKEE

>Zebra\_finch\_HAS1

MSCNIKETITVSSKGRSSGGSCIGGGGARISSFGIGSRGFSGRSYCGGVNYGGGLSVGSLAGGSYGGGNCYGNLGFGLGGVVGGLGGD  
CLLSSCDEKVTMQNLDRLASYLKVKCLEKENAELECRIREWYATQGLSCEPRDYSCYKEIEDLQNIQVCAITDNNKIILDI DNSRMAADDF  
RVKYETELALRQSVNEADINGLRQLDQTLCRSDLEAQLESLELCLLKNHEEMSLRQKSTGDVSVVNAAPGEDLTKILNEMRDEYEQIEKNRREVEQWY  
IARNRKEVEDWYEKIEEVNREVITSGQEVETCNQVTELRRQLQTLIEDLQQLSQRNLESLSLAETECQYNTLLSELQSQITCKVEQQLAIEIR  
AEIECQNQEYKTLDDVKCRLEQEIQTYRCLLEGQDQLIHGGGIGTGGGVIRTSHYTTTSAHCQAQVPPCKTGDIVTCRRI

>Zebra\_finch\_HAS2

MSCSIKQTTSGLRGRSTGGSCVIGGGGGGARISSVSSGRYTS CGIGGSRGFSGRSYCGGVNYGGGLSTGSLVGGNYGGGLGA AVLGGCPGMGFS  
GGSARFGGGMGGMGVGLGGGGFAGDGI LLSGDEKVTMQLNDR LASYLDKVRLEQENADLECRIREWYAKQGPFCPRDYSCYKIEIDLQN  
QIVCATIDNNKIILNIDNSRMTADDFRVKYETELALRQSV EADINGLRQVLDQLTLCRSDLEAQLESREELCCLKNHEEEMCLRKQSTG DV  
SVEVNACPGPDLRKILEMRCQYETLIERNRKEVEDWY ECKIEEVNREVI TSGQEVETCNNQVTELRRQLQALEIDLQAQLSQRDNLES LAET  
ECRYNNHLAELQSQITCVEQQLADLRAEMECQNQEYK ILLDVKCRLEQEIHTYRCLLEGGQQDLIQGGIGQSSGLGGVARS SGI GGGGI RT  
SHTYTSSAQIPSCAAAEIQVPCRRICD

>Zebra\_finch\_HAS3

MSCTVRQVVTTCQGRAS TGSNAAGTGRRVSSASSGRHAA YDMGAVVGSFSGGSVSEGLLGKQLSAGS AAGGSFGATQRAC S ALGFSGGVCTRG  
GFPRAGAGCGDGI L FANNEKATMQLNDR LASYLDKVRLEQENADLECKIREWYAKVGPICEPRDYSCYHKEIEDLQNL I LCAAMETNKI L LN  
IDNNRMTADDFRVKYETECGLRQNV DADINNLRPVLDQLASCKTDLQLQCEALTEEMCCLKTNHEEEMSCLRKQATG DV SVEVNACPGPDLRKI  
LEDLRCQYETLMERNRKE TEQWYACKV EEVNLEVV TSSQEI EESSNKQVTELRRQLQALEINVQAQLTMKENLES LAETECRYNKYLAELQNI  
SCVEQRLAEIRAEMECQNQEYKTL L DVKCRLEQEI QTYHCLLEGGQHD IIGSAGRGVGAAPAGRSTGLKGS L CQPCLP

>Zebra\_finch\_K14L1

MSTTVRQYSSSTSLKGF GSLGGSSRVSSVRVGP GGYRAPS VHGGSGSYSVSSRVV SGLGGAFFGGSYCS SAGGALGAGFGGSFGAGFGAGFGAG  
FGAGFGAGFGGGDGI LPAGEKETMQLNDR LAAYLDKVRAL EEA NTDLEVKIREWYKKGPGPDRDYS PYYRTIEELRNKILSATVENANIVLQ  
IDNARLAADDFRTKFE TEQALRVNVEAD INGLRRVLD ETL SRADLEMQIENLKEELAYLKKNHEEEMTALRGQVGG EISVEMDAAPGIDLTKI LADM  
REQYETLAEKNRRDAEQWFFTKTEELNREVA INTEQLQSGKTEITELRRTIQSLEIDLQSQLSTKAALEGLTADTEARYGTQLAQLQMLI  
TGVEQLAELRCDMERQNH EYRVLLDVKCRLEQEIATYRRLLEGE DAHSSQYSSAMSSHSGRDVM TSSRQVRTIVEEVQDGKVVSSREQVALT  
TR

>Zebra\_finch\_K14L2

MSTTVRQYSSSTSLKGF GSLGGSSRVSSVRAGP GGYRAPS VHGGSGSYSVSSRVV SGLGGAFFGGSYCS SAGGALGAGFGGSY GAGFGAGFGAG  
FGAGFGGGDGI LPAGEKETMQLNDR LAAYLDKVRAL EEA NTDLEVKIREWYKKGPGPDRDYS PYYRTIEELRNKILVTTVENS NLLQIDNA  
RLTADDFRTKFE TEQALRVNVEAD INGLRRVLD ETL SRADLEMQIENLKEELAYLKKNHEEEMTALRGQVGG EISVEMDAAPGIDLTKI LADM  
REQYETLAEKNRRDAEQWFFTKTEELNREVA INTEQLQSGKTEITELRRTIQSLEIDLQSQLSTKAALEGLTADTEARYGTQLAQLQMLI  
TGVEQLAELRCDMERQNH EYRVLLDVKCRLEQEIATYRRLLEGE DAHSSQYSSAMSSHSGRDVM TSSRQVRTIVEEVQDGKVVSSREQITQAAH

>Zebra\_finch\_K18

MSFSRRTVYSSSARS GGIGTLGLTGLTGLTGLTGP GRRSAPLGSAA SVYAGAGGAGSRI SVTRTLSSSAYGAA YGAGYGAGYGAGYAGLGG S I L  
LGGSGAVANEKEAMQDLNDR LAYLEQVRRLEQENRRLE TQIREFMARKGPSAHDWSPQWELIEELRDKILES MVENARTV LQIDNARLAADDF  
RVKFEAELAIRLSVSDS IAGLRKVLDDTNMTR LQLEGDIEALREELILLRKDHEQEVDLRAQVSSQALTVEVDAPRSQDLGKVLGELRAQYDT  
LAQKNLEDELEKQWQQI TETTLEVTQSTKDL DVARGTVGALRRSLQTLEIDLEALRNQ NAGLEAALAEAEARAGAH LAQVQLQVSAEAEELRDV  
RAQLQRQNEQHRELLGLKDRLEAEIATYRQLLEGS DGFSLRDALDKETTATTACMGTTQHLVTE TREVKVRTY

>Nanoranal\_02

MSCHWKSGSVRSVSSVSHRIS SLVGD LAIASDHFAVGNHGANDGL LHGGEKETMQLN IRLASYLDKVALEDANADLETKI KEWYIKHQPKV  
EDYSPYFRIIEELKCKILSES NENARI V LQIDNARLA AEDFKIKYENELCLYQSVESD ICGLRKVLD E LTFAKSALVPQFESLQEELECMKKNH  
EALHFAFKGERADV NVMNAVPGVDLAKLLNDMRAQYEQIAEQNRQKAADWFNEKSAEINQEISHSSEMVECHKTQLTELRRTLQELEIELQAQ  
LAMKKSLECSLAETERCYSTQLAQLQVVVGNVEEQLSQIRNDRERQNAEYKLLLDIKTRLEKEIET YRRLLDGEPWHCKEVH I PVKEASKTRKV  
TTIVEEVNGRIVSQKNVATEEKLKN

>Nanoranal\_03

MQLN IRLASYLDKVALEDANADLEAKI KEWYLKHQAKTVPGDY SKYFSAEDLKNRILVETTENARI V LQIDNARLAADDFRIKYENEVLLH  
QNVEADICGLRRVLDLDTFTKSNLEPQLBESLKEEIECLRNHEEEMNALRGQKGDVNVEMDAAPGIDLTKLLSDMRSQYEBIEAEQNRQKAEQWF  
REKSAELNHEISHSSEMVECHKTQLTELRRTLQELEIELQAQ LAMKKSLECSLAETERCYSTQLAQLQVVVGNVEEQLSQIRNDRERQNAEYQ L  
LMDIKTRLEKEIET YRRLLDGEPWHCKEVH I PVKEASKTRKV

>Nanoranal\_04

MQLNDR LASYLNNVQDLEDANADLES KIKAWYEQHCNDNKQVKDY SKYFKI IEDLKKQIQ AATLDNARIVLQVDNARLAADDFKMKFENELSL  
RLNVEADINGLRKVLNLSLAKCDLEAQIQSLTEEIGCLKKNHEEEMKSF LGVTGQLSVMNNAAPGNDLTKILNNMRADYESLAEKNRREAEAQ  
FIEMSRVLKQEISSGTELIQSTRNEIIDLKR SVQSLEIELQAARAMKTTLESSLAETEGSYCLQ LGHIAKISNLEEMLCQVRTEMESQGI EYD  
HLLDIKTRLEKEIET YRRLLDGEPWHCKEVH I PVKEASKTRKV

>Nanoranal\_05

MSCQKPCAPSRLSVGGNYGTSVCSFPFRAGATCGAQSFGAHQSGGAFGDFGVGSLSGGAVGNFSAGYFGGDGLLCGSEKETMQLNDR LASYL  
NKVQDLEDANADLES KIKAWYEQHCNDNKQVKDY SKYFKI IEDLKKQIQ AATLDNARIVLQVDNARLAADDFKMKFETELSLRLNVEADINGLR  
KVLNLSL ICDLEAQIQSLTEEIVCLKKNHEEEMKSF LGVTGQLSVMNNAAPGNDLTKILNNMRADYESLAEKNRREAEAQFNEMSRVLKQEI  
SSGTELIQSTRNEIIDLKR SVQSLEIELQAACAMKTTLESSLAETEGSYCLQ LGHIAKISNLEEMLCQVRTEMESQGI EYDHLDDIKTRLEKE  
IET YRRLLDGEPWHCKEVH I PVKEASKTRKV

>Nanoranal\_06

MQLNDR LASYLNNVQDLEDANADLES KIKAWYEQHCNDNKQVKDY SKYFQI IEDLKKQIQ AATLDNARIVLQVDNARLAADDFKMKFENELSL  
RLNVEADINGLRKVLNLSLAKCDLEAQIESLTEEIVCLKKNHEEEMKSF LGVTGQLSVMNNAAPGNDLTKILNNMRADYESLAEKNRREAEAQ  
FIEMSRVLKQEISSGTELIQSTRNEIIDLKR SVQSLEIELQAARAMKTTLESSLAETEGSYCLQ LGHIAKISNLEEMLCQVRTEMESQGI EYD  
HLLDIKTRLEKEIET YRRLLDGEPWHCKEVH I PVKEASKTRKV

>Nanoranal\_07

MPGGISVGGQRGGFSNGSLGAFSYGGGDGILQAGEKETMQLNLSRLATYMDTVHALED SNAELEIKITNWDYTHKLPVNDYTKYYSIEALKDK  
IFSATLANNHLTVQSDNARLAADDFRVKFDSERCLYQGVESDANGLR KVLDDLTLDKSSIESQIESLREELAYCKKKHVLEMKDLQGVSDVTV  
QMDAAPGVNLIKILNDTRAQYEH LAEENRRKAE E EYSQKVELNSEISHSSEQIESVKSVDVMDLRRTM QNMEIELQTQLAMKNSLENSLEETED  
RYCDQLAQIQDKITGLE DQLGHLRNDLETSREYKLLLDIRNKLENEIDMYRTLLEEEG

>Nanoranal\_08

MQLNDR LASYLNNVQDLEDANADLES KIKAWYEQHCNDNKQVKDY SKYFQI IEDLKKQIQ AATLDNARIVLQVDNARLAADDFKMKYENE  
FALRRSVEADINGLRKILDELKFRISELQLEIESLTEEIVLLRNHQE EIKGSQGGVGDVNVELNNAAPGNDLKEINNLREQY EAMAENRKRK

AEEQFKKASEGLKKEISTGVEQISTSKSEISDLKKTLLQALEIELQSQWSMKKSLEENLSQTEGQYCMKLSQIQAQIASIEQQLAQLRADMECQT  
AEYEELLDIKTKLENEIETIRRLLEGER

>Nanoranal\_09

MSYAQMSTRSVKVGVSVGGYSGGGSHGQCQFGGDFSQAGGNYQVASFQAGGFGQAGGFGYGGGFEFCGQAGGGYGGAGGAGGAGGASF  
GGGGGFGDAGFGGGDSFLSGNEKQTMQNLNGLRGSYLDKVRQLEAANAIEYEQKIKEFLEKQRSGGTKEAGKDYTKYFTI IADLQSKI IAA  
TN DNANLVLQSDNARLAADDFKMKYENEFALRRSVEADINGLRKVLDDLTMRKSDLELEFEGLTEE IAVLRKNHQEIKGSQGGVGDVNVNELNAA  
PGNDLLKEINNLRQYEAMAENRKAEEQFKKASEGLKKEISTGVEQISTSKSEISDLKKTLLQALEIELQSQWSMKKSLEENLSQTEGQYCMK  
LSQIQAQIASIEQQLAQLRADMECQTAEYEELLDIKTKLENEIETIRRLLEGEDAHLRSASLRLS

>Nanoranal\_10

MAFYKAESMQFSGGSGQCGVGGMQGGYQVGGYQAGYQCGGQGFQKVFAYDAAQCQFGGGAVGGGFGGGAAGGGYGGGAAGGSYGGGA  
AGGGYGGGAAGGGYGGADAGYGGGEMFFSGNEKQTMQNLNDRFATYLDKVRQLEAANVLEKKIKEFLDKQRAGSTTGEKDYSPYFKTIEDLK  
AKIIVAFNNNTIVLQIDNARLAADDFKMKYENELTLRRAVEADIVGLRKLIDDLTSLKSDMESQVESLVQEIATLTKKNHDEEVKGGQTTVGD  
VSVEMNAPGSLLKKNMNDREQYEALAEKNRKAEEQFKKASEGLKQIQVVTTEKTKSEVSELKKTLLQALEIELQSQLAMKKSLEETLQ  
TEGQYCAKIAQIQMIRITAVEEQLTQIRSEMECQTAEYEDLLDIKTKLEAEIATYQKLMQDGR

>Nanoranal\_11

MAFYTSQSSSGGAYGGGLVMNGEGFGEFCDFGGGEGSSTGFGGQVRFSSGGFRAGAGGGGGGGGGGGGGYGGGAGGAYGGSAGGGYGG  
SAGGGYGGGAGGGYGGYGGAGGGGFGGGGFGAGSGLLSTNEKQTMQNLNDRLATYLDKVKTLLEEDNAEYERKIREWYEQRPGSSGTGAGATDY  
SKYFDI IDDLRSKI LAATIENSKLILQIDNARLAADDFRKYENELSMRQSVREADINGLRRLVDELTLRSDELQIEALAEELSYLKKNHQEE  
MGTLAGSQSQSLSVEMNAPGIDLTKI LNDMREQYEALAEKNRKAEEIQFLQSSSELKKEITAGLAETQTKSTEMTELKRTLQSLIEIELQSQLA  
MKRGLEQTLAETEGRYCSQIAKLQDIIGGVEDQLSQRFDTERQSEERYQLLDIKSRLEKEIEQYRVLLDGEGGGSGFISSSSSTTQKTSGSVGS  
SKDSSKTRKVMTIYEDIVDGKVVSSTKTEHLQKM

>Nanoranal\_12

MQNLNDRLASYLEKVRLEAANVELETKISQWYEQVQIGAGNAANDYSKYFDTINDLRSKILAATVDNSTILLQIDNTKLASDDFRQKWEYEQ  
SLRQNVADINALRKVLEDELTLRSGDLELQIESLSEELAYLKKNHHEEMQVSRSSAAGQVEVQMDATPGVDLTSILDDMRANYEALAQNRKDV  
EAQFQKKSSELKELSANVEEVQSSKTEVSDLRRTLQGLEIELQSQLAMKKSLEDTLADIDGRYGAQLQQLQVIGGLEAQLQQRSDMERQST  
EYRELLDIKTRLEMEIETIRRLLEGE

>Nanoranal\_13

MQNLNDRLASYLEKVRLEAANTELEIKIRDWYEQVQVSGVGGKDYKYFEVIEDLRSKILSATIQNSRIVLEIDNARLAADDFRKYENEV  
ALRQSVESDINGLRKVLDELMLSRGDFEIQIESLLEELAYLRQNHHEESQVAKGSAAGQVSVEMDAPPGIDLTKI LNDMREGDYEALADKNRKA  
EAWFAKSGSELKKEISVQVEQVQSTKGEISDLRSLQGLELELQSQLAMKKSLEDTLADIDGRYGAQLQQLQVIGGLEAQLQQRSDMERQST  
EYRELLDIKTRLEMEIETIRRLLEGEIDQFSSQSSSIVTESRSSSTATKTRKVKTIIEEVVDGKVVSSVQVEEENMN

>Nanoranal\_14

MASRFSSSAYQVSSSGGGYGGYGGSSSYGGGGGGSYGGGSGGGSYGGGFASGGGSYGGGFASGGGSYGGGFGGYGGGSGGGFSFGGGG  
AGSGGLGSFSGGQKQTMQNLNDRLASYLEKVRLEAANTELETKIREWYEQVSGGVSAGKDYKYFYDIINDLRKILAATIINDSRIVLQIDN  
ARLAADDFRKYENELALRQSVREADINGLRKVLDELTLRSGDLELQIESLSEELAYLKKNHHEETQIARGSAAGQVSVEMDAVPGIDLTKI LND  
MREDYEMADKNRDAEAWYASKSGELKKEISVQVEQVQSTKSEISDLRRTLQGLEIELQSQLAMKKSLEDTLADTEGRYGGQLQQLQVIGGLEA  
EDQLIQRSDIERQSMERYRELLDIKTRLEQEIETIRRLLDGELGXVQKISLTHFCILDSKKDPTKTRKVKTIIEEVVDGKVVSSRVEVEEKM

>Nanoranal\_15

MSNRFSSASSYQTSSSGGGFGGGFGGSSYAGSYGGYGGSSGGGSGGGGFSFAGGSANFAGNDKQTMQNLNDRLASYLEKVRDLEAS  
NSELEIKIRDWYDQVQVAGAGAGKDYKYFDTIDDLRGIIFDALLNSKLVLQIDNARLAADDFRKYENELALRQSVESDISGLRRALDDLT  
MSRGDLEIQFESLAEELAYLKKNHHEEMQIARSATGQVNVEMDAAPGIDLTKLNDMRADYELADKNRREAEALFAKSKELHQEISAGVQV  
VETTKSELTDLRRSLQGLEIELQSQLAMKKSLEDTLAEITDGRYGGQLQQLQVIGGLEEQQLQQRSDMERQSMERYRELLDIKTRLEMEIETIR  
RLLEGLDVTSTENRPQYLYXXHFLIFISDPTKTRKVKTIIEEVVDGKVVSSVQVEVEEKM

>Nanoranal\_16

MSTSSYQVRSSSHKMASNRSGSYGGYSSASLSGAGFGGGLMSQSTSANYASSGFGGSDGLLLGGEKHTMQNLNDRLANYLKVRDLEVANAEL  
EKKIREWYEQHSATNNSQSRDYSKYFNI IEDLKNRI IATTENARVVLQIDNARLATDDFRMKYENELCLRQSVESDINGLRRLVDELTLGRSD  
LELQIESLTEELAFKKNHQEEMSAYKGSTGQISVEMDAAPGVDLTKI LNDMRADYELADKNRKAEEASFLKKSSELKKEISVQVQVQVSTRT  
EISDLRRTLQSLIELELQAIQISMKNSLEGTLEETEGRYCAQLNQLQNISSIEEQVQVSRSDMERQKAEYVRLLDIKTRLEMEIETIRRLLEGE  
GSAIQQTTSQASVSDSKDPTKVRKVKTIIEEVVDGKVVSSVQVEVEEKM

>Nanoranal\_17

MYSQVAFKKNVSVKTVSHGTSIGGINYRKVTSGGYQAVSYAGAGGLTRVSGVLQHTVHSGSPLQHKGRETRIFGNEKETMNNLNDRLASYID  
KVHSLSESNVHLEAQIRDWYSKNTGNTERNDDHNFQVIKDLRNQIISATVENATITLKI DNTRLAADDFRIKFENEQALRLLTEKDTIELRKA  
DQLTLARAELEMQIEGLNEELVYLKKNHTEEVNIRKQSSGSVDVEVDVAPTNLGKAMEDMREYAKMIEKQRLAKFWFDKKLEDWNEEVHV  
NTTELEKYRKDLTEVKQTVQNLIEHSQAEFSKKNAAEATLGNVKDQYAMQLTDLQENITHVESMLQQTTRDVNHQISEFTLLSLKTRLEAEIA  
TYRSLDGGTRECDDLEWLRCMDQMSVDCRAETKCRNKKGRDDTWTSWNQIRQVVRGWSTVMMKFRVRLVERCTKWQARSKVRFPRLYTRSR  
TLKCRITYQEQQHS

>Nanoranal\_18

MAFTQVSIKRLGSIIDRSPNPLGLYSNVATTRYAGSVYGGAGGYGTKISTGSGFGSGGYSNLQISTGSDVLLAGNEKETMQNLNDRLATYLDKV  
RSLEKANSDIEIQIKEWYIKNSGVVERDYSSYFKAIEGLKNQIILNATTDNARILLQIDNAKLAADDFRKYETEQLVRFVGEKDIAGLRVIDD  
LSLTRGDLELQIENLQEBELAYLKKNHHEEVTALRQVGGTVNVEMDAAPSVDLAKVLSDMRLECEVSEKIREDARLQFETRIEAVHREITVST  
GELEQFKTTITEMHRNIQGLEIELQAEQSKRDGLAATLDNVKAQFASRLAEIQRAISNREAQLMQIRTDMGRQAHEYEILLNIKIRLEMEIATY  
RRLLEGEETR

>Nanoranal\_19

MSLWRVDDLVTRKRDQNGHRLIHGNRKASADFCPSQKDVLIKLNDRLAAYLERVRTLEESSQLEEKIKVSEKRATGHDHSSYLKTIIDLES  
QIRSAKANAGLWLNIENTKTAADC FKEKYVAELTLQDTIKDDVKKLKAASGLQMETRCLEVEEQILTGELKNLMQDHKEEREHLLQEKSKRK  
VNVEVDSVLPTELGALEKMRQYKAIANHHQQHYESLLEKVVWRTMLHLKVL

>Nanoranal\_20

MSLYSSKFLSSCTSINGGIGEPHGSSSYSMGTGNLSRSLSSSLGRIDFTKDYLNDSLLSGNEKHTMQNLNDRLASYLEKVRSLLEANAEELE  
KKIIDWQKNKSQNKKKDYSSYEKAIADLQTLQNGHVNGAKLTLQOMENAKLALDDFKRKYDTEKAFRAVLETDVEGLRRVMDNLTIVRTDLEMD  
VEGMRKQLIYMRKSHHEEDMRLAQAKQKQGSTVNVEVDAPKADLAKCIAEVRKDYEAIIANNRKEAEEWYTHQSTTVQKEVNTHTALQSSKNQT  
RELKRTLQNLLEIEMQAELESKKQGLENTLDETOCHAGAQLQKIQELICQMENELSKVRNDRQSNYKILLDIKSRLENEIGTYRRLIDGNNSR  
YNYVYTNRKVKTIQDMVNGRVVNSRISEIPQKI

>Nanoranal\_21

MSVKLSQRSSSGSLRGLGSGSCGVGRI SNVRTGGSYRASSVHGSGSRVMGSSYGVGGLGCASGGSISLGLGGAGGYGSFGYGSAGGLGSG  
FGFGGGSFASGGESIININEKETMQVLNDRLASYLHKVRSLEDENSQLEKKIREWYEQVYPTSPDFNPFYFRITIEELQHKILQANATNASILLQ  
IDNARLAADDFRTKFKENEAAALRMGVEADISGLRRVHDELQLSKRDLEMQHONLNDELNFKKNHEEEVLSLRSQLGAKINVEVDAAPAVDLNRV  
LTDLRSQYENMMEQNKAEKLFHDKSDELNQOMTSSSQIQTFNTEVLQQLHTFQNLIEDLQTNMSKTALENTLADTEARYCAQLSQLQEMI  
NDVEVKLAELRCDLERQNFYEYKTLMDVKTHLEREAIATYRQLMDGEDIQRETIIRRRSLQQTILSVLQIPLLPPTV

>Nanoranal\_22

MQHLNDRLASYLDKVRSLEQENAQLERNIQEWYERNQPSALPNFSSFFRIIQELQGGQISSTSLDNARITLQIDNARLAADDFRNKYEMERQLRC  
SVEADVNGLRILLEELNRDINCNLQAQVGNLQEEELQOMRRNHKEEVNALQAQLGARVSVEMNAAPSADLNRTLSEIREQYENLMEQNLREVETIF  
QQRTEELNRDVASGSEQLQSVQTEVIDLNRTVQTEIEIELQSQLSMTSALENTLAEATEATFGAKLAQLQCLINSVESQLAQIRSDLERQNEQYRI  
LMDQKTHLEMEIATYKRLLDGHHSHSKAHHGTSHSNHHQSV

>Nanoranal\_23

MEKVPGINQLDKVKFRPQAFSVVTPLLDPLMETVILVAICLKSQVTMVLVMDLQITIMEDPTLLANMDYHMVYLMVYMLLIMEDHIFPSMEV  
PILLIMEAPTDFIAEVLIVLIIILPMPSPMEVPIKSIMATTEIEPPVYMEGQEEETMQHLNDRLASYLDKVHSLEQENAQLERNIQEWYERNQPSAL  
PNFSSFFRIIQELQGGQISSTSLDNASITLQIDNARLAADDFRNKYVMERQLRCSVEADVNGLRILLEELNRDINCNLQAQVGNLQEEELQOMRRNH  
EEVNALQAQLGARVSVEMNAAPSADMNRALSEIREQYENLMERNMREVETIFRQRTEELNRDVASGSEQLQSVQTEVIDLNRTVQTEIEIELQ  
QLSMTSALENTLAEATEATFGAQLAQQLQCLINSVESQLAQVRSDLERQNEQYISILMDQKTHLEMEIATYKRLLDGQAFAGDVSLILSKSTCDVA  
DRLHLRWLYNMETLMEAAHILYREDREWNEIASSQGEYSELPGRRVEQSAAVVKMMRSLSTPAQCQHIAGPLSN

>Nanoranal\_24

MQHLNDRLASYLDKVRSLEQENAQLERNIQEWYERNQPSALPNFSSFFRIIQELQGGQISSTSLNNASITLQIDNARLAADDFRNKYEMERQLRC  
SVEADVNGLRILLEELNRDINCNLQAQVGNLQEEELQOMRRNHKEEVNALQAQLGARVSVEMNAAPSADLNRTLSEIREQYENLMERNLREVETIF  
RQRTEELNRDVASGSEQLQSVQTEVIDLNRTVQALEIEIELQSQSFRSALENTLAEATEATFGDQLAQQLCLINNVESQLAQIRSDLERQNEQYRI  
LMDQKTHLEMEIATYKRLLDGHVFWRNVPDESIKLSPEVFWCLSSSYVTSIGCFIQANLAWDMNKIHPDPYTIHIQKCNGTIIAAGGVI FVR  
FQDHQKVIQFGPYLQELRFRSHSLGSLVQPLQHPKAMQQRERDPRGHFFLPQAMFDEYPPHDTFMRFPYHEWGGRRGGGIGGKSSYFCIYVVLV  
YRVLQKLLIESPKRTERSQSQVKGQVGGMVRQ

>Nanoranal\_25

MQHLNDRLASYLDKVRSLEQENAQLERNIQEWYERNQPSALPNFSSFFRIIQELQGGQISSTSLDNARITLQIDNARLAADDFRNKYEMERQLRC  
SVEADVNGLRILLEELNRDINCNLQAQVGNLQEEELQOMRRSHKEEVNALQAQLGARVSVEMNAAPSADMNRALSEIREQYENLMERNLREVETIF  
RQRTEELNRDVSSGSEQLQSVQTEVIDLNRTVQSEIEIELQSQLSMLKSALENTLAEATEATFGAQLAQQLCLINSVESQLAQVRSDLERQNEQYRI  
LMDQKTHLEMEIATYKRLLDGHDIQ

>Nanoranal\_26

MQHLNDRLASYLDKVRSLEQENAQLERNIQEWYERNQPSALPNFSSFFRIIQELQGGQISSTSLDNARITLQIDNARLAADDFRNKYEMERQLRC  
SVEADVNGLRILLEELNRDINCNLQAQVGNLQEEELQOMRRSHKEEVNGLQAQLGARVSVEMNAAPSADMNRALSEIREQYENLMERNLREVETIF  
RQRTEELNRDVASGSDQLQSVQTEVIDLNRTVQTEIEIELQSQLSMKSALENTLAEATEATFGAKLAQLQCLINSVESQLAQVRSDLERQNEQYRI  
LMDQKTHLEMEIATYKRLLDGHDIHHTSSHNFLGSDGSHHTMKAHHGTSHSNPHHTPLGSASFRHNLAWGMNKIHQDPYTVDTIEIMQGYGLVS  
DMFITIGWW

>Nanoranal\_27

MQHLNDRLASYLDKVRSLEQENAQLERNIQEWYERNQPSALPNFSSFFRIIQELQGGQISSTSLDNARITLQIDNARLAADDFRNKYEMERQLRC  
SVEADVNGLRILLEELNRDINCNLQAQVGNLQEEELQOMRRNHKEEVNALQAQLGARVSVEMNAAPSADMNRALSEIREQYENLMERNLREVETIF  
RQRTEELNRDVASGSEQLQSVQTEVIDLNRTVQTEIEIELQSQLSMKSALENTLAEATEAFAQAQLQCLINSVESQLAQVRSDLERQNEQYRI  
LMDQKTHLEMEIATYKRLLDGHDIHHTSSHTFLGSDGSRWPSGSSSRQNLARDKVVQDPYTVDTCEIMQGYGLVRDMLISIGANFTLEAWIQTG  
NSSVRMAVLVTATTVVGFPPYSGSGVRCQWSAFTNTTSLGLK

>Nanoranal\_28

MQHLNDRLASYLDMKVRSMQENAELEARNIQEWYKRNQPSALPNFSSFFRIIQELQGGQISSTSLDNASITLQIDNARLAADDFRNKYEKARQLRC  
SVEADVNGLRILLEELNRDINCNLQAQVGNLQEEELQOMRRNHKEEVNALQAQLGARVSVELDAAPSADMNRALSEIREQYENLMERNLREVETIF  
RQRTEELNRNVASGSDQLQSVQTEVIDLNSTVQTEIEIELQSQLSMKSALENTLAEATEATFGAQLAQQLCLINSVVSQSVRSDLKRQNEQYRI  
LMDQKTHLEMEIATYKRLLDGHDIHFLFMRPPVSASSRQNLAWDMNKIHHDTPYVDTIEIIFLFRPPVSASSRQNLAWDMNKIHHDTPYVDTI  
EIM

>Nanoranal\_29

MQHLNDRLASYLDKVRSLEQENAQLERNIQEWYERNQPSALPNFSSFFRIIQELQGGQISSFLDNARITLQIDNARLAADDFRNKYVMERQLRC  
SVEADVNGLRILLEELNRDINCNLQAQVGNLQEEELQOMRRNHKEEVNALQAQLGARVSVEMNAAPSADMNRALSEIREQYENLMERNLREVETIF  
RQRTEELNRDVASGSAQLQSVHTEVIDLNRTVQTEIEIELQSQLSMKSALENTLAEATEATFGAQLAQIQCLINSVESQLAQVRSDLERQNEQYRI  
LMDQKTHLEMEIATYKRLLDGHDIHHTSSHTFLGSDASHHTMKAHHGTSHSASFRQNLAWDMNKMHDPYTVDTIEIMQGFGLVRDMFITIGV  
NFTLEAWIQTGDSVVRTAVLVTTTIIIVGFPYGGVRSVSVRHLH

>Nanoranal\_30

MSYSNKQNSQSEKHKGSKILSQITSLSLRGRKDNAGTWRPI SFQVQKPSASATVTKHHSFTHGANYGFTNSSFGKEVSLNRESKHHILLPTNEK  
ETMRILNDRLASYLEKVRSLLEENAHLEKKIRDWDYDTHNPQMLPDFSHYFAEMEELQRKISSSTSLDNASITLQIDNARLAADDFRNKYEMERQL  
RCSVEADVNGLRILLEELNRDINCNLQAQVGNLQEEELQOMRRNHKEEVNALQAQLGARVSVEMNAAPSADMNRALSEIREQYENLMERNLREVET  
IFRQRIEELNRNVASGSEQLQSVQTEVIDLNRTVQTEIEIELQSQLSMKSALENTLAEATEATFGAQLAQQLCLINSVESQLAQVRSDLERQNEQY  
RIILMDQKTHLEMEIATYKRLLDGHDIHHTSSHKFLGGSDGT

>Nanoranal\_31

MNHSQHKSLSSTSFKASVPVRSHSPKLSVHHGISHFSHHGGYHKVHHTAHNTHGGSSKPIMFSSKHSSFPHGYYGNVHGVHNNDSHFNSIGS  
HSSWKNDGFLNVNEKETMQLLNDRLATYLEKVRSLQENAEQMEKKICEWEHKEVHSSMPDFQHYKYTIEELQNKISATSLDNARLVLEIDNARL  
ATDDFKNKYELEIRLRFTVENDLKLGRMVLEGLNIERGDQVQLECLQDEVLMQKHHHEEDVSSLRNQLGSRINHVDAAPSVDLNRVLCVRE  
QYENMMEKNLKEVESIFILRSEELNRQMASGSEQLQSVQTDLIDLKRCQLEIQLSLSMKSALLECTLAETEATFGSOLIQLQSLIDNVEDQ  
LSQVRSLELRQMYEYKILMDQTRLEMEISTYKKLMEADIHVPEHHPIHQEKIYKEISHGSSKHISTQEYDHGKGGHQTKEPSH

>Nanoranal\_32

MQHLNRLATYLEKVRSLQENAEQLEARNIREWYERNQPSFPDSSGFFRTIQELQSQISSASTENARIVLQIDNARLASDDFKNKYEMEMRLRS  
SVESDVNLRRVLEELNRRERCDLESQVQSLQEELLQMKRNHEEVNLSRAQLGARVNVVEVDAAPSVDLNQSLSEIREQYENLMDRNRDVENMF  
LQRTTEELNREMASGSEQLQSVQTEVIELRRSVQTEIQLSLSMKSALLECTLAETEATFGAQLSOLQCLINNVESELAQTRGDLERQNHYYKI  
LMDQKTHLEMEIATYKRLLDGHDCKVSPSC

>Nanoranal\_33

MKNSSAASPMPFKYGSFYFPEQGGFNSTHSGPSTLKTFFHESNGMTLGRAYKNLYEHSSKSDHKRVNSPTRGGSYNSYHGETFDHCSSSSANGNL  
WYKEIAHSPGHSYNMQSGGAHNSKNGRKSNSLKFINERETMOFLNERLASYLEKVRTLEQNGQMERRISEWYENNAPALPSSQFLKFTIEE  
VQKKIFAATVENANIALQIDNSKWATDDFSNKYEIEVLRNNGVADVKGLQGIIEVLHKEKLDLEFQVQELQEEVQEMKKNHEEVNLSRGLG  
ARVSVLEDAAPSIDLNSVLSDIREEYENLMERNLRDVEAMFLARTEELGCQVEPGSENVQSVQIEIIDLKRSVQNLIEDLQSQNLNMLALQDNL  
TETEANYSSELAQLQRMINNAESELQVRCDLERQNIYKILMDQKNLLETEIATYKHLLEGQDSCVKNKADSIASDITTTSTDPESNPTECHPA  
VKHSSEASC

>Nanoranal\_34

MQMLNDRLLSSYLDKVSALEQENAEQLEARNISEWYANNAPSSLPDSSQYFRIISDLQSQIAAATMENARIVLQIDNARLTADDFREKYEMLSISN  
NTEADINALRRVLEGLNRDNCDEMQVQNLQEELQEMKRNHEEENCLRAQLGARVNVVLENAAPSIDLNRALTEIRDEYENLMERNLSDVEDMF  
RQRSEELNRQVTSGSEQLQSVQTEVIELNRTIQTEIQLSLSMKSALLECTLAETEATYNSQIAQLQAMINNVQCQLTQIRSDLERQNYEYKI  
LMDQKTHLEMEIATYKRLLDGHNHIVSDYGMSSGKHGWRVTEEDDHTSASTYQMLLDKTSANSKEMPPQAPIADSSSPYMDSAGGYDLGFT  
HSIAMNHREKYRYSLARSYKNI SRMGSPVLQMSRPHHGLTRFSSHGGCSKSTGQSQFFYYGELHESHRRSYMYDKVDSKAFHGSSKAFKLS  
GHHATSYGCKALQDTKNLFPVSHGYNVHCHNTYLRNSREYDKCKNHSIFDFN

>Nanoranal\_35

QKKTMIHLNERLSSYLEKVHSLQDKERFEKKIAKWEYENNAPGMPADLSKYFKTIQELQNIISTVFTNNVGIIRNIDNARMAVDEYNNKYEVEL  
ILKTSIDADVNWLHVLDFGNDQSVKLDSEADLQEQEMLKIRRDSEQDINFLTSQLGTRVSVVEVVSASADLNNALSGIREEYELMEKNLRKI  
ENLFLQRSEKLNQKVTSGSEQLQSAHTELDIVKHSQLEIQLSLSMKSALLECTLAETEATYNSQIAQLQAMINNVQCQLTQIRSDLERQNYEYKI  
EYQLLMDKTHLEMEIATYKRLLDGHDCKVSPSC

>Nanoranal\_36

EKEIMQLLNERLSSYLTKVRSLEMEMAQLDRKIFEWYASYQPKTPPDGTHYRILIDELQNKIAEAAIENAWMLLETDNARLAADDYKTKLEMEQ  
TLASNVEMDIQKLERVLEGLWGEAAERGMQVRSLOEERDLRNNSEEVIESLSQLGARINVELNAAPSIDLNEALSEIREEYELMERNLGEA  
ANMFLGQSEELTREMEEFGSEELQSIETELIELKRCMQALEIELQSELSLKSALLECTLAEMEATFGSKLAKLQCLINGLESDLAQIRSDLERQNH  
EYRTLMDQKNHLEMEIATYKRLLDGHDIE

>Nanoranal\_37

MSHSNIHSSSRSLIDLGHCGGKGGSSHISHHHGGLPAVHHKSSISHHGHHYKSPSVHGVKTRVSVFSTHSSSGHGHGLRSGHGGHGHGSNLSVA  
GGHHQWKNAGFLSINGKETMQLLNDRLATYLEKVRSLQENAEQLEARNIREWYANNAPSSLPDSSSHYFRTIQELQNVSTANVDSARIILQIDNA  
QLAADDLKSKEYEMELNLRNNVEADVASLRKALEDINMQRQDLEIQLRCLQEELLQKKNHEEENCLRAQLGARVNVVLENAAPSIDLNRVLCVRE  
RDQYENLMERNLKEVESIFLARIEELNSEMSSGDEQLQTVSNELIDLKRTAQTEIQLSLSMKSALLECTLAETEATFGSOLIQLQSLIDNVE  
SQLGQIRSDLERQNHDKYKILMDQKTHLEMEIATYKHLLDGHDIEYVKTSL

>Nanoranal\_38

MSYKTFQPFRRGFYRAGREYLGYPYRSHTSSSDVKKPKYISHNVPPYRIHQVHVGSGGSGIRHSSSGQRDVMGNAHGFRNDHKIRQSSNRTGWT  
NSKLFNFDEKKTMQSLNGLRLESYLENVKQMEENVIEKKEICEWEKHSVMYVDFSSYLHTVTDLQDQILLATEFQIASLVKQISNGHTTADDF  
RNKEEMNFKMRTLAEKDLCDHTGILETINMEKQNLNANIQLNEEBLQQLMKTSEEBIKCLQAQLGTRVNVVEVEMTPSIDLNKALSEIRKEYESH  
MERNLSDIESKFDLTSELSMSSSIDQLQFQSNIAIDLKQKTLAEALKKQMSISVQNSTFMEINEGYSSQLKYHQVDVIDINELQMEIISQ  
KVKQLNVEYELNANTKIFLEKEIATYKHLLEGQTTKYV

>Nanoranal\_39

MNQTVKQVKSSTQGRSQASSYNQTVRRTGVSVSYHGGRRHQAHGGHIRAPSVHGGSGGKISISIRHFSHGHSFGSVHSSGHNFHVQSTHGV  
FKNDGLLSFNEKETMQLLNDRLATYMDTVCTLEQENSQLEARNIREWYKNEPNGLPDCNKYYRTIQELQRISEASIQNAKVFLLDMNAKLAD  
DLLNKYELESNLRNIESDVKGLHRVLERLNMEMGDLQMCVCNLQEELQELRKTHEEVNCLRTQLGARVSVVEVNAAPCKDLNNTLSKIRQEYE  
NLMDRNLNEVEAIFLARSEELNSEMVFGEQIQSVSSDLIELKRRVQTEIQLSLSMKSALLECTLAETEATFGSOLIQLQSLIDNVE  
TRFDLEQQNTAYKILMDQKNHLEMEIATYKHLLEGHHIHASVHSNNTEIHHGVKVLTKQVHQANVQLTKAQVHQAK

>Nanoranal\_40

MCGSGSTENRSGFSTYSLESYSGKNDGLFSMNTKETMMLNDRLATYLEKVASLEMENQRLEKIKVWYKKNVPPQLPDNSKYLKVIIELOKE  
ILDARIKNNRVFLHIDNARLAGDDLQTKYNMELSLHNTIEADVVDLRKGLDGLTLERCELEFQLEQLSEDLILLKKNHNEEVNLDKEQLGARIEH  
VEVDVAPAKDINKVLASIRNEYESLMERNLKDVEKWFVTQSEELNSQMVSGAEHLQTVKYEVIDLNHTIQNLEIDLQTLQNTVG

>Nanoranal\_41

MSFSFSQSGGVSSRLSDGIYRAASVHGGYGGSRISMSGGSARSGLGGGAGFGGGAGFGGGAGYGGGSSFSASMSAGSGGDGLLSGN  
GKYAMQNLNDRLATYLDVRSLQANNDLEVKIRDWYAKQGSATVREQSFAGFYTGIDELRDKIFVATINNSKMIIEIDNARLAADDLFRKLFEN  
ELSLRQSVENDINGLKRVLDDLTMTRSDLELQIEGLREELAYLKKNHEEVEGKKEQAAGTVNVVELDAVPGIDLLRNLNELREQYEHIAKNNR  
EAEALFLSQAEALQNEVVTNTQQAQSVKSESTDLRNQLGLENELQSLSVKAGLESSVANVEDRYAAQYIQIIGGIEAQLADLRSDLERQ  
NQEYTTLLDIKSRLEQEIATYHQLMEGEGGK

>Nanoranal\_42

MSYSYAHSSSRAGSGLSSRISSGVLGSSSVHGGYSGSGISQSVHRLASSGFGGSSYGGSSGSGFSNIIASSGEGIFSGNEKYKQNLNDR  
SNYLDKVKCLEEANTELEHKIHDWYEQGSVTVREQSYSHYHTTIEELREKILAAATNDNHQITLAIIDNARLAADDLFLKYENELHMRMGVESDI  
QGLRRVLDLTLARSDELQIENLKEELAYLKKNHEEEMSDRGKQMSGTVNVEMDAAPGTDLCKTLGDMREQYEHIAKNNRDAEAWFVAQSES

LQKEVVSNTQQAQSSKTEITDLRRTMQGLEIELQSQHSMRAGLEASISETEGRYAAQLNHIQSVIGTLEEQLSNLRSELEHQNVAYRTRLLDIKA  
HLEAEITTYRKLLEHDQSTGASHKESKGN

>Nanoranal\_43

MSYSSRQTSVTSYRGLSGIGGGGRVSVFKSPSVHGGYGGQGVSVSSARLVSSYGGGLSGSGGGFSSGGGFSSGGGYSSGGGYSGGGYGS  
SFSVSTSGDGLLAGNEKETMQLNDRSLTYLDKVRDLETANSDELVKIREWYEQGSPTRDYGHYFKVIEDLRDKILGATIDNSRIVLQVDNA  
RLAADDFRTKFENELALQASVEADINGLRRVLDLTLARADLELQIETLKEELAYLKKNHHEEMNSLRGQVGGQVSVSEVDSAPGTDMTKILSDM  
REQYEHLDADKNRDAEAWFLSKTEEINTEVAVHTEQIQTSKTEITDLRRTLQGLEIELQSQLSMKASLEGLTSETEQRYGAQLAQIQARISNLE  
AQLTDLRSDMERQSYEYKQLLDIKTRLEQEIITYRQLLEGHDTF

>Nanoranal\_44

MAFYSSSSSYRTSGSSGGAKGPGCRNSVSVFSKYAPSGAGGAFGGNVGYCQAGDLGAGYDGEFAGVGYGGGASVGGGAGAGFGGVCSGFGGGA  
GAGFGGGANAGYGGGANAGYGGGANAGYGGGAGAGFGGGYGFNGGGFGEGLLAVNEKQTMQNLNDRNLANYLDKVRSLNANAELEKKIREWYE  
KQSPVSKTADYSQYFKTIEDLRAKIFAATKENNKVILIDNTRLTDDFRKLYENELVLRQSVLEADINGLRRVLDLTLKSDLESQIESLNEE  
LYMKKNHHEEMKLGQAAGSVNVMNAAPGLDLSKILADMRADEKLESEKRYKESEEMFLAKTKELQVQVVTGVQEVQTSKTEITNLKHTLQ  
SLEIELQSQLSMKASLEASLADTEGRYCAQIAQIQDLIAKLEELADLRNQLEMQTSYKMLLDVKSRLQEIYAKYTQLLDGQDFK

>Nanoranal\_45

MSVKQGVKGLGSSGNSVRASSVRVCSGTQSHGGFYGGGAGGSLAGGYGGYGFSSGSGFGASSGFGHGGGPGFGIGGGHSGFGYQDQGLLNF  
NEKNTMQLNDRNLASVLDKVDLEQANAELEKKIRQWYESHGPKPSQDYSHYFKTIEEIQKKIHDATIDNGRITLQIDNARLAADDFKLYENE  
LFLRQTVEADINGLRRVLDLTLRSRDLQAENLKDKEKAMKKNHEEDMKALQGVQGTNNVDLNPTEGIDLQKILGDMRHYESIMAKNKD  
MEDWYRVQTEELSQKMKKETHVKSTQTEITDLRRTFQSLIEDLQAQISMKAALGLTAEETEGRYCMKLAEIQNMIQKVEEELANIRCDMSNQS  
QEYQILLDTKARLEKEINTYRSLLDGQGTQISKGSQDYSSGSQSDKTGGSYNVRIRTEDSDGRVISTHDQKYQSGYRK

>Nanoranal\_46

MSSRSIQGLSGFGSSNRMYMASHRVPSIHESGKNIYFSTSRSLSEVNLGSLNGLGGGLGELGYFGGGFGGGDGLGGREKETMQLNDRLAT  
YLAHVHLEKANAELIKIREWYEQAPSTSYDYSQYKAIEDLRNKIHSATFDNASLILQIENVKLAADDFRTKIETEHALRLNVEADINGLR  
KILDDLTLNRSRDLQVLESLKEELVYLLKKNHEEMNALHGEAHGTVSVMDAAPAVDLTKILAEVRDKYETLSEKNRKEAEDWYFKKTEELNRE  
VASHSEQIQSSITESTDLKRTLQSLIELELQMLSMKSALEGLTAEETESQYCVKLSQIQDLISGIQDLAELRSDIERQNYKIIMDMKTHLEQ  
EITTYRRLLEGEDVQ

>Nanoranal\_47

MASYSISQSSSTSGSRGLSGGGLGGSSRVSMGYRTPSIHGGSGGKNISISTSRMSSGGSLGCSLGGGLGGAGGGYGGSYSSNFGYSGSGF  
GGYGGGFGGGGGGLGGDGLGGGEEKETMQLNDRNLASVLDKVRSLQANSELEIKIREWYEQAPSPSRDYSQYYSIIEDLRNKILNASVP  
NASVVLQIDNAKLAADDFRTKYETEHALRLNVEADINGLRRVLDLTLRSRDLQVLESLKEELAYLKKNHHEEMIALRGQVTVSVMDAAP  
AVDLRSRILSEMRDQYEVMAKDNKRDVEGWYIKKTEELNREVASHSEQIHSKTEITDLRRLQGLEIELQTLQSMKSALEGLTADTEGRYCVQL  
SQIQDLIGSVEAQLAELRSDMERQSYEYKILMDVKTRELEQEIATYRRLLDGEDVKISYKESPQTSRQVRTIIEETVDGKVISSSERVQKAKY

>Nanoranal\_48

MMSFSARSINQSGHFGGGRAGVSRARSVAGGAASVSMSSSTSFNMAAPAFGAGFAAQASNFASGKETMQLNDRNLRSYLERVRCLEKANSBLE  
VKIREFYERKSAISAFDPSGYDITISKLSRQIQGATIENARHLQIDNAKLAADDFKMKYEAELAIRQGVVEDIGGLRKADELITNRSDELE  
IEGLKEELIYLLKKNHEEELAVSQGRIGGQVNVEMDSTPQVDLSKVLAGVRDQYQMMEKNRQEVETWHRGQSENLRQEVVALGQQSFQVKNSEVT  
DLRRTSQTLELELQSLNMMKRALBGLTSETEARYGTEIAQLQSLISQLEIDLQVQRSDAEHQSHHEYKTLNLIKTRLEQEIATYRRLLEGEDASM  
TSVFNQSYVKIISKEEAQSSSTQIKVKTVVEQVVDGKVVSSSVKQKAKTTP

>Nanoranal\_K18

MSFSNAYSALRSNRPFAYPQPMVGGSSAASVHAGAGGSGSRISVSRGATVSGSGFGGGSGFSGGSGAVSSGMGLGGVQNEKETMQLNDRNLAS  
YLERVRSLESVNQKLELQIRQHMEKKGPTKDWAPYFKTLEELRKQVDFRDLTNSQLVLQIDNARLAADDFRVYKSEYAIRLSVETDIGGLRKV  
IDDTNISRLNLENEIESLKEELIFLKKSHEDVNEVHAQIASSSLTVEVDAPKTQDLGKVMSEIRAQYDTMAQKNREDAEKWYQAKVEEHTMQV  
SQDTEALRSSKTTVTELRSLQSLIELETLRNQKQSLGSLNNTENRYAMELEILSAQLQALEGELTQVRNDCQRQHQHYQIILNAKIRLESE  
IQTYRRLLDGDDFSLQDALSASNVSTTQTVKVVITTTQRIIDGK  
VVESNDTHVLES

>Axolotl\_K24L3

QVMQNLNERLASYLDKVRALAEANTELETKIRDWYQKRQGSAAAGSADYSKYQIIDDRAKISAATIDNARVLLQVDNARLAADDFKLYEN  
ELAMRQSVLEADINGLRRVLDLTLMSRSDLEMQIESLTELAFLLKKNHHEELQGVSSAAGQVSVEMDAAPGNLTKILNDRADYALADKNRR  
DAEAAFMKQTGELKAAISQEVSSVQSSKSEVSLRRTLQGLEIELQSQAMAMKSSLESTLAETEGRYGAQLCQMQRISSELEQLMLRADMQQQ  
SMEYQQ

>Axolotl\_K24L2

NEKQTMQLNDRNLSSYLEKVRALLETANADLEIKIRDWYAKQITSGTISPDHDHKNFFETINDLRSKIKSPVDNARMVLQIDNARLAADDFRK  
YENELYFRQSEIADISGLKRVLEEQNMSRAELEVQIETMTEELTYLKTNHEEELQALQQAAGQVNVIEDAAPGVALTKRLKDMRTDYEALTER  
NRMEAEQWFIQKSMELKREMTKGVVEVQTTTTEVSEQRRLAQSVESTEMQSOLAMKKSIEDSLIETENRYGVQLMQIQLIISTTEELGQVRGDM  
ERQRSEYQQLLDIKVRLEMEIETTYRRLDDEEG

>Axolotl\_K15L1

IEELRAQLFQSTTSRTILEVDNARLAEDFKMKYENELAMRQSVLEADINGLRRVLDLTLMSRSDLEMQIESQKEELAYITKSHEEVEGEMRTKM  
TGQVSVEMDAAPGLDLTKVLTREMQYEFMADKNRREAEATFIASSELQKQEVLANVEVQVSGKGEITEIRRMQGGSEIELQSQYSMKVGLEAS  
LSDTEARYGAQLLQIQSVISGYEAQLINLRSDMEQSSLEYKTLDDAKNQLEMEINMYRQLE

>Axolotl\_K24L4

NEKQTMQLNDRNLASVLDKVKALEDGNGELEKIRDWYEKHRPGSASGDPGRDYSKYPIIEDLKKKIIAATLENACKMLQIDNARLAADDFKL  
KYENELCMRQNVLEADINGLRRVFDLTMCKSDLEIQLESLTEELAYLKKNHHEEMKSLSGGATGEVTVEMNAAPTDLKALNDRMRGQYEAIAE  
KNRSEAEARFQESKELKKEVSKGVEVQVQSTKTEISDLRSMQALEIELQSQLAMKRSLEETLAETEGRYCSQLNKIQTISGLBEEQLNQIRMD  
MENQSSYQMLLDIKTRLEQEIQTYRRLDDEEG

>Axolotl\_K15L2

SGAGGLFSSGGGFSSGGGFASGGGYSSGGFSGGGFSGGGGAGESSGGLLGGNDKHVMQNLNERLASYLEKVALESSNTELEGKIRAWYDKQG  
ASGATATQRDYGHFYKTI DELRNQIMESTIGNSKVLEVDNARLAAEDFKLYENELGMRQNVQDINGLRRVLDDELTMRSRDLEMQIENLKEE  
LAYLKKHHEEEMEMTKQMSGVSVEMDAAPGNDLTKVLTEMREQYEFMADKNRREAEAQFIASSEQLQKDVVANVQVQVSGKSEITEIRRSLO  
GLEIELQSQLSMKAGLEASLSETEGRYGAQLHQIQSVISGLEAQLINLRSEMEHQNQEYKTLDDVKNRLEMEIDMYRQLLDGQDAKSATWTSSA  
AKGGSSSSSATTKTSSSTQVVRTIVTEEVNGKVSSQ

>Axolotl\_K17L

EKATMQNLNDRLASYLKVRSLQANSKLEMQIREWYEQKQPGPSRDYSPYKYTIEELRSKILAATLDNARTLLQIDNAKLAADDFRNKYETEL  
GLRMSVEADINGLRRVLDLTLARSMEINIESLKEELAYLKKHHEEEMNALRQVGGQVNVEMDAAPATDLSKILSDMRSQYELMADKNRKA  
EAWFFSKTEELNREVATHSQEIQSSKSEITDLRRTLQGLEIELQTLQMSKSALEGTLAETEGRYCMQNLQIQGMSINVEAQLGELRSDMERQGH  
EYRILLDVKTRLEMEIATYRRLLE

>Axolotl\_K19L

SEKETMQNLNDRLGSLDRVRSLEVANTDLEQKIREWYEQKQPSPTRDYSHYFKTIEELKEKIFNATVDNAKVVLDQVNDARLAADDFRSKFENE  
QALRLNVEQDINGLRRVLDLTLRSTDLQEMQIENLKEELAYLKKHHEEELGAMSGQVGGQVSVVEMDAAPSVDLGRILSEMREQYKEMADKSRRE  
AEEWFFTKTEELNKEVASHTQEVQTSRTEITDLRRTMQGLEIELQSQLSMKASLEGTLAETEARYGALQIQGMI SHIEAQLGDLRSDMERQN  
QYKMLMDIKNRLEMEIATYRQLLE

>Axolotl\_K23L

NEKETMKNLNERLASYMDKVQELQEANKELEVKICDWHARQATRGKRDYSTYEKTIADLQTIQIVTGRMDNARLTQMDNAKLAEDDFTTKHRE  
KAARMALEFDVERIRKLLDDMTIVKTDLEMEVEGLRKDLLCMKHEHEEEMSTLRAQQRSSNVSVELNAKPSHGLSKILKEVREYEAIIIEKYSR  
EAGAHYKEQAKSFQEVSTNTEYLENDNKEALELKRAYQDLQIELQAEISRKSGLERTLEETECNFAVDLQRKQSVFQLEEEELNLRDQLAQ  
QNEHQTLDDIKNRLENEITTYRHLLLE

>Axolotl\_K15L3

TNYSAGGGSGLGKDGFGGRDHQHRQTFSSVHGSQAGAGSGFGGGCYGGSSYSGGSSYGDFFSSGARRSSLPVNEKVTMQDLNDRLASYLEKVKTL  
EETNHALEVKIQEFQRGPRTVLEQSWKTYEDTINPLKEKIKDMIISNGQKTELEDNIRLTADDFRTKYEMEVSLRRTVEDDINGLKEKQQAEL  
GSSMLDQEMTSLQEEISDLKKNHEEELAEMRSQMEGTLNVEVDSAPSVDLNRITANMREDYERVIKHKHQEAEEAWYQSQVEAQHVEVVKTTQDV  
QTSKSETRELQKQCQSLHAELDALHSVKASLEMAVGATEARYQEKVHQIAMRAAQVEAQLAALRGDLVQGNQDYQNLFNIVKLEAEIATYRQL  
LEG

>Axolotl\_K18L2

FTASSPVKNFSSAGVINGAVKVNDEKTMRCNLNDRLASYLEKVRYLEKTNQELEIKIQDKMKADAPVFRDHGPFVFAQAHALSQEIATIASQENAR  
LMLSIDNAKLAAGDFRMKWETEAAIQLSVERDIAALRGVDEHVLGSLRAQMSLEDELHFLKQNHKEEMDAMKESVANSKVDVEVDVAVRGP  
DLASILADVRSQYEEIVKKNKEADALFQTKVDSLMMQVEQDTKASENAKEELTQRRRLQSLIELESLNQTNALRGNLEASLTYRNDMDG  
LQESISRMEAELEAIQRNMQSEKFEYEAALLRIKETLETEIAVYRRLGEGEEESKI PPPKEPEPTTKKIVKVVTQTLVDGKVI EESSEVEEFE  
VKKK

>Axolotl\_K24L1

SSQSHSGGFSSSAMSSGFGAGSSFFSTSGAGSGGGGFSFGGGGAGFSLGGGDDKQVMQNLNDRLASYLKVRSLQANSKLEMQIREWYEQKQPGPS  
RDYSPYKYTIEELRSKILAATLDNARTLLQIDNAKLAADDFRNKYETEMHMRQNVQDINGLRRVLDDELTMRSRDLEMQIENLKEE  
LAYLKKHHEEEMHSTAGGSDVSVEMDAAPSLDLLQTLNSMRADYEA MAEKNRQEAEDMFKRKAELNREI AVEVQAVSTGRSEMSELKRT  
LQGLEIELQAQLAMKKSLEQT

>Axolotl\_K9L

SHILAAADIENGLILAI DNTRLTADDFKLYENELFFCQAVDADNGLRRVLDDELTVTKSDLEMQIESLTHEELVALKKNHEDELKEGSQQQEAG  
SVNVKMNAPGVDDLKALNVMREDEYKLSAKYRKEAEDQFQAMSKDLVQVATDSQATHSVKSDASSLRQSLQSLIEIELQSQLSMKASLESTLA  
ETEGRYCMQNLQIRISQVEEELGDLRADMENQSSSEYQMLLDIKARLEQEI STYRSLIE

>Axolotl\_K18L1

LQRQSIGFQRFGLSSASMHAGAGGQGARISVSRVSTVGSFGGGGSGFGGGYGGGSSGFSLSGSGNEKETMQDLNDRLASYLKVRSLQANSKLEM  
QIREWYEQKQPGPSRDYSPYKYTIEELRSKILAATLDNARTLLQIDNAKLAADDFRVKYEAEALARTSVEMDIAGLRKVIDDTNMSRLN  
MENEIESLREELIFLKKHHEDEVRLNQAQIASSGLTVEVDAPKTDQDLGKIMAEIRAQYDVLAQKNREDAERNFORQVEEVTIEVTRNTEDLQAS  
RTVTVDLRRTLQGLEIELESMSRLKANLEDTLDRTEGRYGMVDHINNMILRLEEDLTQVRNDQQRQAQDYQSLNLIKMKLEAEIETYRRLLDG  
GDEFTLQDALSSSNASSTQMVKKVIITTTQRVVDGKVVV

>Caecilian\_K23

MSSSRPFWSSSGSVKGGEGRLIHIDSSYSTSSVHGGAGGSRVSVSTARPLASSGLGWGSSGNFFGGGSAHVLFNTDKETMQNLNARLASYLEK  
VQSLEKANAEELEKIKKHEERTPQNKRDYSKYEKI IADLHAQIANGRLNARLTQMDNAKLAADDFKLYETEQTLMRAIEADVNGLRKLLD  
DLTIVRTDLEMEVEALRRELILMKMVHEQEMDALQARQSRSTVDVQVAAPSVDLTKILAEMRQYEAIEKNREAAASWYKQKSTMQQEVTT  
NTEALESSRKEVNQLKRTLQSLIEIQSELSKCKSLENTLAETQANYAVKLNQVTVICQLEELANVRIDIERQONEYKILLDIKSRLNEIA  
TYRQLLDGDDVRTDTSEFSKETNRKVKTIQVDVIDGRVSSKVVSEIHK

>Caecilian\_K117

MASFSSRSFSQSFSQDTSVRGPQVGLLSSSQKGGRRAFVVGAGGTGARISSSSASFVKAGIGGGYGSFAFGIGGGFVVGFAAGVLAKDRGSL  
SMNEKETLQNLNRLATYLEKVRSLQANSKLEMQIREWYEQKQPGPSRDYSPYKYTIEELRSKILAATLDNARTLLQIDNAKLAADDFRNKYETEL  
NELRVRVGLVEADNSGLRKLVDLTLKSNLEMQIEGLQEEVIHLKKNHEEEMANLRSQGGSVSVELDSTPGIDLTQIMADMREQYEMIKKNR  
EVEAWHTAQSEALNREVATHTAEAIQTSKGTITDLRRSIQGLEIEMQSGISMGSLSTRSETRYAIIQLQQLQDSISRLEAGLQFVRADASR  
QAIEYTLQDLVDKNRLEAEIATYRHLDDDEDSSKSSVYELQKVSSIISSRGKSSGRPY

>Caecilian\_K17L

MSTSYSIRQTSSTSGSSMGLGGFSGGSPRFSSVHLENY GAPNMFAGGGRVGSASKSRLVSGLGAGFSNGYGGDFISSYGVGGDVFLPGEKE  
TMQNLNRLASYLKVRSLQANSKLEMQIREWYEQKQPGPSRDYSPYKYTIEELRSKILAATLDNARTLLQIDNAKLAADDFRNKYENELALR  
MSVEADINGLRKVLDELTLTKADLEMRIESMKEELIYLLKKNHEEEMNAFRQVGGGRVNVVEMDAAPSVDLTKILAEMRNQYETIAEKNRKDAEDW  
FFSKSEELNKEVATHAEQIQTSKSEITDLRRTLQGLEIELQTLQMSKAALEGTLAETEGRYCMQNLQIQDLISSVEAQLADLRSDMERQSYEYK  
ILMDVKTREMEIATYRRLLDGEEISGSGKDVVSQTTTRKVRTIIEHVDGKIVSSREQVHHSTY

>Caecilian\_K19L







MSCGSGFGGLRAFSCVSAACGPRPRGCCISAAPYRGVSCYRGLTGFGRSRLGGFCGGYRAGCGRSFGYRSGGVCGPSPPCITSVSVNESLLAPLN  
LEIDANAQGVKHEEKEQIKCLNSKFAAFIDKVRFLFQQNKLETKWQFYQNRKCCESNLEPLFDGYIETLKRELECEVADRGRLESELYHVQEV  
LEGFKKYYEEVFLRATAENEFVALKKVSDVDCAYLRKSDLEANAESLTEEINFLRALYEEEEIRVLQAHISDTSVIVKMDNSRELNMDCVIAEI  
KAQYDDIATRSRAEAESWYRSKCEEMKATVIRHGESLRRTKEEINELNRMIQRLTAEVENAKCQNSKLEAAVTESEQQGEAALNDAKCKLAGLE  
EALLKAKQDMACLVKYQEVMNKSLGLDIEIATYRRLLEGEERLCEGVGAVNVVLSRGGVVCGLDCTTGARPVTTGGVCSAPCSGNLVVSTG  
GPCVPCGPGSPVGSFSAAGSCGLGGSGVSGCISYVGVSCVSTCRCK

>Platypus\_K83L2

MSCGSYCAGSGLRAFSCVSAACGPRPRGCCISAAPYRGVSCYRGLTGFGRSRLGGFCGGYRAGCGRSFGYRSGGVCGPSPPCITSVSVNESLL  
TPLNLEIDPNAQGVKHEEKEQIKCLNSKFAAFIDKVRFLFQQNKLETKWQFYQNRKCCESNLEPLFDGYIETLKRELECEVADRGRLESELYH  
VQEVLEGFKKYEEVFLRATAENEFVALKKVSDVDCAYLRKSDLEANAESLTEEINFLRALYEEEEIRVLQAHISDTSVIVKMDNSRELNMDCVIAE  
EIKAQYDDIASRSRAEAESWYRSKCEEMKATVIRHGESLRRTKEEINELNRMIQRLTAEVENAKCQNSKLEAAVTESEQQGEAALNDAKCKLAG  
LEEALLKAKQDMACLVKYQEVMNKSLGLDIEIATYRRLLEGEERLCEGVGAVNVVCSRGGVVCGLDCASGARAVTTGGVCSAGCGGNVVVG  
TGGGCVPCGGVSACSARSCTTSCNR

>Platypus\_K83L1

MACGSGFGFRNFGRSALVPRFGDRCCISAAPYRGVSCYRGLAGFGRSRLGGFCGGFRAGCGRSFGYRSGGVCGPSPPCITGVSVNESLLTPLN  
LEIDANAQGVKHEEKEQIKCLNSKFAAFIDKVRFLFQQNKLETKWQFYQNRKCCESNLEPLFDGYIETLKRELECEVADRGRLESELYHVQEV  
LEGFKKYYEEVFLRATAENEFVALKKVSDVDCAYLRKSDLEANAESLTEEINFLRALYEEEEIRVLQAHISDTSVIVKMDNSRELNMDCVIAEIK  
AQYDDIASRSRAEAESWYRSKCEEMKATVIRHGESLRRTKEEINELNRMIQRLTAEVENAKCQNSKLEAAVTESEQQGEAALNDAKCKLAGLEEA  
LLKAKQDMACLLKEYQEVMNKSLGLDIEIATYRRLLEGEERLCEGVGAVNVVCSRGGVVCGLDCATGARPVTTGGVCSAPCSGNLVVSTGGP  
CAPCATPAPCGPGGSCSGSVGVGSYGLGAFGFGKC

>Platypus\_K85L2

MSSRAPRLSAGCGAGALSRSRAVVPRAHSCISAVAYRSGGVPIPRGSLGGAVSSRIAGGRGRSLGAGPGFGYRSGGVCGPSPPCITAVTVNESL  
LTPLNLEIDANAQGVKHEEKEQIKCLNDKFAAFIDKVRFLFQQNKLETKWQFYQNRKCCESNLEPLFDGYIETLKRELECEVADRGRLESELS  
HMQEVLEGFKKYEEVFLRATAENEFVALKKVSDVDCAYLRKADLEANVEVLMEEISFLQALFEEERLLQSQISDTSVIVKMDNSRELNMDCV  
AEIKAQYDDIASRSRAEAESWYRSKCEEMKATVIKQGENLRRTKDEINELNRLIQRLTAEIENTKQQRSKLEAAVAEAEQQGEVAVSDAKAKLA  
GLEAALQKAKQDMAQLREYQELNLIKALDIEIATYRRLLEGEESRLCDGVNSVNICVSRSGGVVACGLDSSVSRGTTISSGTSCPTSRGVS  
CSSARSVRFA

>Platypus\_K85L1

MSCRSYRISSSGCVSRFTSSSSAVAPRVGDRCCISAAPYRGVSCYRGLTGFGRSRLSVAAGCPRI SMGGYRPGCGRSFGYRSGGVCGPSPPC  
ITVSVNESLLTPLNLEIDPNAQGVKHEEKEQIKCLNSKFAAFIDKVRFLFQQNKLETKWQFYQNRCCQSNMPLFNGYVETLKRELECEVADR  
SGRLVSELNMQEVLEGYKYYEEVFLRATAENEFVALKKVSDVDCAYLRKSDLEANAETLTEEIDFLRSLYEEEEIRLLHSQISDTSVIVKMDNS  
RELNMDCVVAEIKAQYDDIASRSRAEAESWYRSKCEEMKATVVRHGESLRRTKEEINELNRMIQRLTAEVENAKCQNAKLEAAVAEAEQQGEAA  
LNDKCKLAGLEAALLKAKQDMACLLKEYQEVMNKSLGLDIEIATYRRLLEGEESRLCEGVGAVNVVCSRGGVTCGGFSCSTTPGRQISTGSS  
MSGGSYTMAMPDSCAPCLPRGPGFSCGSSRSVRFA

>Platypus\_K84

MSCRSLISSRRCTSGFSSCSALAPQASSCQRISTVSCRSGVSGRRAFAGFGSRSVAVSFGSCSPRMAVASSFPGRGCGFGGGYGGSYRLGRAG  
FGYRSGGVCGPSPPCITAVTVNESLLTPLNLEIDPNAQGVKHEEKEQIKGLNFKFATFIDKVRFLFQQNKLETKWRFMQQKSSRSNLEPLF  
ETYIRTLQRLDASAADRARLESEYSQIQGVLEGFKNKYEEVGFRAAENEFVALKKEVDMAFLNKADLEANLTLVQENHFLRTLYEEEEIRL  
LQSQISSETSVIVKMDNSRLDLDLGI IAEVKAQYEEIAQRSRAEAESWYQSKYEMRIAAGQHNDLSLRNSRNNINELNRQIQRLRAEVEHAKAQR  
CKLEAAVAEAEQQGEAALNDARAKLMDLEAALQKAKQDMARQVREYQELMNVKLALDIEIATYRRLLEGEESRLCEGVGPVNI SVSSRGGVVC  
GTESPTTTTSSYTRSGACFSSSSGSRVASARSSGCGLSLGRSRVSVGASRGACGVSVDTCPCVPVSGGFSSGSGRSSSGRFVSVSCSSRR  
AQC

>Platypus\_K82

MSCRSPSTPRCGSRFSFSSCSAVLPRPGSRVYLSRGPACRAGGYRALGCFASRSLCNVGTGKPRVAAVSCLPSRGGFGYRAGGACGTGPCIAPVT  
INESLLIPLELEIDPNVQRVKDEKEQIKCLNNKFASFIDKVRFLFQQNKLETKWVFLQEQKCCQNNLEPLFEAYISTLRRQLECVVGDHGR  
EABLSGMQEVLESYKRYEELSRLPCAENEFVALKKVSDVDCAYLRKADLEANLTLVQENHFLRTLYEEEEIRLQSQISSETSVIVKMDNSRDL  
LDGVI AEVKAQYDDIASRSRAEAESWYQCFEELRVDSAGKHCDTLRSKNEILEMNRILQRLQEQEIDSTKGRCKLEAAVAEAEQQGEAALNDA  
KCKLAGLEAALQKAKQDMACLLKEYQEVMNKSLGLDIEIATYRRLLEGEESR

>Platypus\_K75

MSRQSTVTFQTGGRKGFSAASAVTPSAGRTRISSVSVSRSGAGGGGGGLAWTCCGGGGFGRSRLYGLGGSKRVSISGGGFRGGYGGRAGGGGG  
YGLGSLGGGGGGGGGGFPVCPGGIQEVTINQSLAPLNLQIDPTIQRVREEREQIKTLNNKFASFIDKVRFLFQQNKVLDTKWELLQQQG  
TKTVRQNLPLFDAYISDLRRQLDVTVAERGRDSELSMQLDVEDDFKAKYEDEINKRTAAENEFVALKKVSDVDCAYMNVKVDLEAKVNSLSD  
EINFLRVLYEAELSOMQQTQISDTSVVLMDNNSRLDLDLSI IAEVKAQYEDIAQRSRAEAESWYQTKYEELQVTAAGRHDLDLNTKHEISEMNRMIQR  
LRSEIDSVKQCASLQTAIADAEQRGEMALKDARAKLVLDLADALQKAKQDMARQLREYQELMNVKLALDIEIATYRKLLEGEERLCEGVSPV  
NVSVVTTMSSGYGSGSYGLGSGSGHGLGGGGSSYSYTTSGGHSGLGGSGHGLGVAGFSAGSGRFGSGGGSSVVKFVSTTSSSRKSYKH

>Platypus\_K6aL

MSCKSTVTMHSSGRRGFSAAALAPGACRTGFSSLSVSRSGAGGSGFGRVCGGGAGGAGFGSRLYNLGGSKRISISAGGCGYGGRGVGVSGFG  
SGFGGGGGGGGGGSGMGGGGGGGGFPVCPGGIQEVTINQSLAPLNLQIDPTIQRVREEREQIKTLNNKFASFIDKVRFLFQQNKVLDTK  
WQLLQQGTQKTVNQNLEPLFESYISNLRRQLDSILSERGRDSELRGMQDLVEDDFKAKYEDEINKRTAAENEFVALKKVSDVDCAYMNVKVELTAKV  
DSLMDLEINFLRALYEAELSOMQQTQISDTSVVLMDNNSRLDLDLSI IAEVKAQYEEIAQRSRAEAESWYQSKYEELQVTAAGRHDLDLNTKHEISE  
EMNRMIQRLRSEIDHVKKQCANLQAAIADAEQRGELALDKARAKLEEAALQKAKQDMARQLREYQELMNVKLALDIEIATYRKLLEGEERLCEGV  
SGEGVGPVNI SVVSTVSSGHGGGGVCSGYGLGGGSLGGLSVGGSSFSSSSGRCLGGGGSGSTGSSSVRFSTTSSSRKSYKH

>Platypus\_K5

MLRQSSVSFQSGGRKGFSAASAVTPSASRTSFSVSVSRSGGGGGGAGFGRASACGPGFGSRLYNLGGSKRISISGGYRSGFGRAGGGGG  
YFGGGGGGGYFGGGAGSGFALGGGAGGGGGGGFPVCPGGIQEVTINQSLAPLNLQIDPTIQRVREEREQIKTLNNKFASFIDKVRFL  
LEQQNKVLDTKWELLQQQGTQKTVRQNLPLFESYISNLRRQLDSILNERGRDSELRGMQDLVEDDFKAKYEDEINKRTAAENEFVMLKKVSDV  
DAAYMNVKVELTAKVDSLMDLEINFLRALYEAELAQMQTSVSDTSVVLMDNNSRLDLDLSI IAEVKAQYEDIAANRSRTEAESWYQTKYEELQVTAAGR  
HDLDLNTKHEISEMNRMIQRLRSEIDNVKQCANLQAAIADAEQRGELALDKARAKLEEAALQKAKQDMARQLREYQELMNVKLALDIEIATY  
RKLEGEERLCEGVNPNVNI SVVSTVSSVSGYSGGGSGFGLGGGLGGGSGYSYSSGGHSLGGGLSVSTGGGFSAGSGRGLGGGGGG  
SGSSGSSVVKFVSTTSSSRKSYKH

>Platypus\_K71

MSRQFNCKSSKGSFSGRSAILPGGRGASSGSYRAGSKATAAAGVVGFGSRSLSYSLGGTRSISLNVAGGGGTRSSGYGFGAGAGGCGPGRVRA  
SGFAGSMFGSVALGPACPPSSCPPGGIHQVTVNQSLQLPLDVKVDPEIQKVRTQEREQIKVLNKKFASFIDKVRFLQEQNQVLETKWDLQLQDL  
SNCKNNLEPIFEGYISNLRRQVEGLNGDRVRLDSELRSVRDLVEDFKKRYEEEINRRTAAENEFVVLKKDVAAYTNKVELQAKVDSLDEIKF  
LKCLHEAEIAQIQSHISDTSVILSMDNRRDLDLDSIIDEVVRVQYEDIAALKSKAEAEALYQTKFLEQLVAGRHGDDLKHTKNEISELSRLIQRI  
RSEIENAKKQCANLETAIADAEQRGDALCDARAKLDLLEGALHSAKEELARLLRDYQELMSVKLALDVEIATYRKLLEGEECRMSGDFPSSVS  
ISVISSTSGPSGTGYRPSAVSGGYAVSSGYAVSGGYAVSGGGSSSSGARAGEARRGSASDFKDALAKGSSLSVSPTRKSPR

>Platypus\_K72

MSRQLSCRPNRERGLDSSLSAVLARKGSSSSGSYRAGPKVAGAGVVGFGSRSLSYSLGGTRSISLNVAGGCARSSGYGFGAGAGGYGPGRVRA  
SGFAGSMFGSVALGPACPPSSCPPGGIHQVTVNQSLQLPLDVKVDPEIQKVRTQEREQIKVLNKKFASFIDKVRFLQEQNQVLETKWELLQDL  
NNCKNNLEPIFEGYIGNLRRQVEGLSGDRVRLDSELRSVRDLVEDFKKRYELEINRRTAAENQFVLLKKDADAAYTNKVELQAKVDSLDEIKF  
LKCLYDAEIAQIQTHVSETSVILSMDNRRDLDLDSIIDEEVRSQYEDIAALKSKAEAEALYQSKIQELQLAAGRHGDDLKHTKNEISELNRLIQRI  
RCEVTNVKQCANLETAIADAEQRGDALCDARAKLDLLEGALHSAKEELARLLRDYQELMSVKLALDVEIATYRKLLEGEECRMSGENPSSVS  
ISVISSSGGGGYRPSAVSGGYSASLAGSPAGGARGDAKVKVPNTSEPKDVLVKTASGGGSPAKKTSR

>Platypus\_K73

MSRQLNCRPAGERLFGSGCSAVISSRVSSSTASFRAGVKGSCAGFGSRSLSLGGSSRRISISAAGGVSRSGSLALGAGAGTGLVGGRGAGFVGT  
VFGSAGLGPLCPSVCPGGIPQVTVNKSLLAPLHVQVDPEIQKVRTQEREQIKVLNKKFASFIDKVRFLQEQNQVLETKWDLQLQDLNCKNN  
LEPIFEGYISNLRRQVECLNGDRVRLDSELRSMDLVEDFKKRYENEINRRTAAENEFVVLKKDVAAYTNKVELQAKVDSLDEIKFLKCLYE  
GETAIQIQSHISDTSVILSMDNRRDLDLDSIIDEVRLQYEDIAHKSKEAEAEALYQNKIQELQVAAGRHGDDLKHTKGEIIELNRLIQRI  
RSEIGNVKKQCANLEMAIADAEQRGDALCDARAKLDLLEGALHSAKEELARLLRDYQELMSVKLALDIEIATYRKLLEGEECRMSGEPNSVSI  
SVISSSSGAGAFSVGFGSTSGYSYKAGATDVKTKAGCSSEAKESKAPGAVSLPKKNPR

>Platypus\_K74

MSRQFTYKSGVPGKGGFSGCSAVLPGGRGASSGSYRAGPKAAGAAGVVGFGSRSLSYSLGGTRSISLNVAGGGGARNSGYGFAGAGGYGPGRV  
RASGFAGSMFGSVALGPACPPSSCPPGGIHQVTVNQSLQLPLDVKVDPEIQKVRTQEREQIKVLNKKFASFIDKVRFLQEQNQVLETKWDLQLQ  
DLNCKNNLEPIFEGYISNLRRQVEGLNGDRVRLDSELRSMDLVEDFKKRYEEEINKRTAAENEFVVLKKDVAAYTNKVELQAKVDSLDEI  
KFLKCLYEIEAQIQSHISDTSVILSMDNRRDLDLDSIIDEVVRVQYEDIAALKSKAEAEALYQTKFQELQLAAGRHGDDLKHTKNEISELSRLIQ  
RIRLEIENAKKQCANLETAIADAEQRGDALCDARAKLDLLEGALHSAKEELARLLRDYQELMSVKLALDIEIATYRKLLEGEECRMSGESNS  
VSISSVSSSTATSAGGFLSSASAYGYRPGSAGGGFGCVTGGGCTPRGDVRTSKGSAGEFKDTLTKAPALSSPTKKTTR

>Platypus\_K2L2

MSRQLGWKSRSGGFTSGSAVLTGGRRTSSSSFVCRPGRSRRSAGSGTFTSKLSVSLGGTKSISTSVAGGLGALDVGLGGGLVSGLSAGGL  
LGAGRPGGFGPACPPGGIQAVTVNQSLQLPLDLKVDPEIGNVKTQEREQIKVLNKKFASFIDKVRFLQEQNQVLETKWELLQVNTTTTQTS  
SALFEAYISLQKQVVDVLAQRTQDSELRITQDRVEEYKKKFEDEINSRTNAENDFVLLKKDVAAFMVKVDLNTKVEGLQREIEFLKVFYEA  
ELSEVQRNVSDTSVVLSDMNRRSLDLDSILQEVKAQYEEIAQRSKAEAEALYQYKQELQVSVGKHGDDLKVVKTEISELNRTIQRRAEIEHV  
KKQCASVQEAILEAEQRGERTVKDAQAKLVEEALQMAEDLARMLRDYQELLSVKLSLDVEIATYRKLLEGEECRMSGDFSSNVSVVKS  
SSTQGLSQSSLGSGRGGPYVPDGLLVSKSNSSTSRNTVSSSVSGSDSVSISGVQDSSSRSLRRSSEVGTDRDSPASLVK

>Platypus\_K2L1

MSRQLSCSSRGGGGRGFSSGSVVLVSGSRRVASTSCMMRRGGGGGGGFCGAGGGGGFGSRSLSLGGSKSISMSVAGSGGGGFGRGGGG  
GGFGGGGGGGGGGGGGGGGGGGFVGGGGGGFGLGGGGFGLGGFGRPGGPVCPGGIQEVTVNQSLQLPLDVKVDPEIGNVKTQEREQIKTLN  
NQFASFIDKVRFLQEQNQVLETKWELLQVNTTKRTNLEPIFEAYISLQRHKSLSGKTRLESELSLQELVEDFKKRYEDEINKRANAEN  
EFTVTKKDVDSFVMKVDLQAKMDDLREIEFLRVLYDMELSQMHQSVSDTNVLSMDNRRSLDLESIISEVKAQYEEIAKRSMEAETLYQSK  
YQELQVTAGSHGRDLKQTKMEISELNRMIRLQGEIAHVKKQCKSISDAVAEAEQHGERALQDAAQKMGLEAALQKAKEDLARLMKDYQDLN  
VKLALDVEIATYRKLLEGEECRMSGDYPSQVTVSVSSSVSMTSGVSGSGGGGGFSGGGGSSGGGSGGGYSGGGGSGGGFGSGGGGRVGS  
GGVGGSSSGTKVSVSRPH

>Platypus\_K1

MIRQFSSKSSYQSGGGGGFSSGSAGVGGRRVTSSSSSVRRSTGGRYGGGGGFCRGGAGGGGGFGSRSLSVSLGGSKSISMSVAAGGGHFGGF  
GGGGGGGGGGGGGGGGGGGGGGGGGGGGGGGGGGGGGGGGGGGGGGGGGGGGGGGGGGGGGGGGGGGGGGGGGGGGGGGGGGGGGGGGGGGG  
IDKVRFLQEQNQVLETKWELLQVNTTTRTNLDPIFEAYISSLRHQIDTICKDRSRLDSELKNMQDLVEDYRAKYEDEINKRTAAENEFTVTK  
KDVAAYMTKVDLQAKVDSLQVEINFYKVLFDALSQMQTHISDNTNVLSDMNRRSLDLDSIISEVKAQYEEIAQRSKAEAEALYQHKYQELQV  
TAGRHGDSLKNTKTEISELNRMIRAEIENVKQIASLQQAADAEQRGEAALQDQGLQLEEVLOKTKKEELARLLKDYQELMNVKALD  
VEIATYRKLLEGEECRMSGDFQDNVSVSVNNTVSMSSGGGGGGFGRGGGGGGYSGGGGGYSGGGGGYSGGGGGYSGGGGGYSGGGGGYSGGG  
GYSGGGGGGGGLGGGRSGSGGGGGGGGGGGGGGGGGGGGGGGGGGGGGGGGGGGGGGGGGGGGGGGGGGGGGGGGGGGGGGGGGGGGGGGGG  
GYSGGGGGGGGGGGGGGGGGGGGGGGGGGGGGGGGGGGGGGGGGGGGGGGGGGGGGGGGGGGGGGGGGGGGGGGGGGGGGGGGGGGGGGGGG

>Platypus\_K77

MSRQYSSKSACGGGRRVFSARSTMAFRGTGRTGVSAGRVGRCGSGGGGGGGYGSRSLYNLGGTKSISVSVAGAGYGRGGSCGGGGGGGGGG  
GSGSLGGGGGGGGGGGGGGGGGGGGGGGGGGGGGGGGGGGGGGGGGGGGGGGGGGGGGGGGGGGGGGGGGGGGGGGGGGGGGGGGGGGGGG  
NTTTRTNLDLSEIAYIASLRRQLDCLNSERMQRDSELRSMDQVVEDFKSKYEEEINRRTAAENDFVLLKKDVAAYMSKVELQANVESLMREL  
EFLKCLYESELQMQTHISDNTNVLSDMNRRSLDLDSIIAEVKAQYEEIAQRSKAEAEALYQHKYQELQVTAGRHGDDLKSKMEISELHRVIQ  
RLQAEITNVKQIGHVQTSISDAERGERALQDAAQKLELETAQQAQKAKEELARLLRDYQELMSVKLSLDVEIATYRKLLEGEECRMSGELQSP  
VSVSVQSSHTTISGGGGGGYGGGGYSSSVRGSFGSGGGGGSYRGGSSGGGGSSYGGGSSVRGGSGISRSRGGVKSAGGNSRVQIIQTSTNTSSKR  
IFE

>Platypus\_K76

MSRQATLATASKSGSSGGASRTFSGRSAVVTSSSTRTSGRSAGAAVSGSMSACAGYGGGGGGFGSRSLSLGGNKKISISVAGGVSAGGGGGG  
GRSGGRMGGAAGGGGGGGGGGGGGGGGGGGGGGGGGGGGGGGGGGGGGGGGGGGGGGGGGGGGGGGGGGGGGGGGGGGGGGGGGGGGGGG  
NKFATFIDKVRFLQEQNQVLETKWELLQVNTTTRTNLDPIFEAYISSLRHQIDTICKDRSRLDSELKNMQDLVEDYRAKYEDEINKRTAA  
ENEFVVLKKDVAAYMTKVELEAKVESLSEVNFLKALYDAEMSQVHSETSDTSVVLSDMNRRFLDLDSIIAEVKAQYEEIAQRSKAEAEALYK  
TKLGELESTAGRHGDDLKSTKSEISELNRMIRLRAEIESVKKQNTNLQTAIADAEQRGELALCDANAKLVELKAAALQAKDDLARLLRDYQEL  
MSVKLSLDIEIATYRKLLEGEEYRMSGECQNEVSIAMVSSHSSSSSAAGGAGGAGGIRGGIAGGVSSSVSGGSRVSSSTVSSSVSGGSSRA  
VGGGLSSGAVTSVGGSAVAGGTSSSSSRVAPASGLTQRATTKF

>Platypus\_K3L2



MHKRALLSPCRAQVHLFSLLLLAPGQHLCSFILAVASIPNQKPA MSRQSTVRIQRGRSGFSTASAVVPNTCRTSFSRSRVTRVGGC NAGSGFAR  
VGGGFGSRSLYNVGGCKRISVAGRGGGFYGSAGFGGGAGSVYCGGGFGMPVNTGYGYGAFGGMGPPFAGGIHEVSVNQSLKPLNLEIDP  
SVQRIRKEEKEQIKTLNNKFASFDKVRFLQEQNKVLETKWLSLLEQEQMKTVRNNIEPLFETYINNLRMQNLNSLSDKGRLEGEVNTQYLVED  
FKKKYEDEINRRTVAENE FVTLKKD VDATYMNKVELQAKADAMSEENFLRALYEAELS QMQTQISDTSVILTM DNNRNL DLD SII SEVKAQYE  
DIANRSRAEAEAWYQTKYEELQATAGRHGDDL RNTKQEI SELNRHVQRLRSEIDNVKKQCANLKA AIADAEER GELAL K DARAKLAELE DALQQ  
AKADLARQLREYQELMNVKLALDIEIATYRKLLEGE ECR LAGDGV P VNI SVTRTTITGTGYGGGNSLSMGGGVC SMGNSFSCGSGP SVSNTAFGA  
GSSSSMNFVSSSSTRRSYRS

>Kiwi\_K5L2

MSRISFRSSTGGMRGFSGSAIVGGSSGARSSFSVSVSRVGGGRAGGGGGFGAGGGFGSRSLYNLGGSKRISYSSVGGGLRSGAGGGYSFGG  
GAGYGVCYGGGAGAGFLGGAGGGGGYGLSGSFGVGGGFGGRGXXXXXXXXXXXXXXXXXGPGFVCPGGIHEVTVNQSL LAPLKL D DPEYQKVR  
THEREQIKTLNNKFASFDKVRFLQEQNKVLETKWTLLEQEQHTVTRKSLLEPLFEAYINNLRQLDSL MGERGRLDSELNMQDLVEDFKNKYE  
DEINRRTGAENE FVTLKKD VDGAFMNKVELQAKADSLADEINFLRALYEAELS QMQQVSDTSVVLSMDNNRNL DLSI IAEVKAQYEDIANRS  
RAEAEAWYQNKYEELQVSAGRHGDDL RNTKIEISEINRMIQRLRNEIDSVKKQCANLQAAIAEAEER GEMAL K DAKAKL TELEDALQKAKADLA  
RQLREYQELMNVKLALDIEIATYRKLLEGEESRLAGEVGVAVSVVSTSSGMGYGSSGMGGGLGMGGGGGGSSGYSMSSSSGFGMG  
GGSGALGGGXXXXXXXXSFGSGRGISSTGSSMRIVSKTTTTSKTIR

>Kiwi\_K5L1

MARSGGGGGFGRLLIGGGGGGSCAGFGSKSLYNLGGTKRISIGVSSFRAAFGGGAGSSGLSGGAGGGLGLGLSGGGGGGLGGFSGGLGG  
GRSLGGFVGGPPVGTIQEVTVNQSL LAPL NLEIDPNIQVVRKDEKEQIKTLNNKFASFDKVRFLQEQNKVLETKWTLLEQEQKNNTKGTM  
DPLFEAYINNLRQLASLLNERGHMDGELKNMQDLVEDFKNKYEEEEINQRTAAENE FVTLKKD VDAAYMIKVEL EAKVDAL TDELNFLRALYDA  
ELAQLSAQVSDTAVILSMDNNRDL DLSIIAEVKAQYEDIANRSRAEAEAWYQTKFEELQATAGKHGDDL RNTKGEISELSRLIQRIRSEIENV  
RSQCATLQTAIGDSEER GELAL K DARAKMIELE DALQKAKADMARQLHEYYQELMNIKLALDIEIATYRKLLEGEESRLS GEGLNPIGYSVSSS  
SGMAGGGGGFGLSLSGGALEVEDLVSEVVVVVSEVDMEEVVLAWEEAAVLSQVVMATEEEEECATLQTAIGDSEER GELAL K DARAKMIELE  
DALQKAKADMARQLHEYYQELMNIKLALDIEIATYRKLLEGEESRLS GEGLNPIGYSVLEAEAVVEATALEVEDLVSEVVVVVSEVDMEEVVLAWEEAA  
VLASQVVMATEEEEEVAAG

>Kiwi\_HBS1

MSRQCYTSSSLLGRRGFSSASAVCGLGRGNSSASVCPQVGRRCIGGFSSRSVCDLGRGQRISFGGNCRSVYGGAGVGRCGVAYGGGRFGVG  
TVIGFGNCGSYGGLGNRYRGLGDGVAIGGYGGGIGIGLAGGRSEGRVSIHPPELLKPLCVGVDPEECQVRTHEKEQIKNLNNQFACFIDKVRLL  
EQNKVLTWKWELLQQYVLPASRRNLEPVFENFICNLRKQLECVLGERERLENEERCLRDVLQVEYKCKYEDEINKRTAAENE FVTLKKD VDCLY  
LTKEELEVRVGLLRQQLLEFLKCIYAEERAQLDCQLCDTSVIVQMDNSRDL DMEGIIKSVECCYEEIAQSKAEVEAFYQTRLEELHSSRGKFC  
DLRNNQSEIAELNRMIQKLQCESDNVKKQIAALQTAICDAEQRGDCALKDARQKLDLQ TALQQA KDKMACLLRDYQELNVLKALDIEIATYR  
TLLEGEESRICTGNPVS VAVVSGGGTVGECRTLSGIGGKCTVKTGGVSSGLGVVSSFGVGGTGF SARSVDCLPRVGGGFARSAMVSCVGREVIS  
GADAVQCSPSVANLGSVVCAGVEQCNPGGVVIIPGAGVCATGNRYNTAMRVVTR

>Kiwi\_HBS2

MSRQAPTGRSVDLGRGFSSAEICGRS YAASACQPVRCGAGAYSSRSACNLGGNRRISYVNGVCGTGCYGEFGYGGVYGSVGGRVGLCGPRGY  
SIVRGYPRKADGIQGIICIDERLLKPLCVGVDPLEHEIRCQEKEQIKTLNTQFACFIDKVRFLQEQNKVLETKWGLLQQHVL PPKGKNLELYFE  
NYICDLRKHLDCLLCEKQKLGSEECATSQLVEEFKCKYEEIINRRTTVENEFVALKKDADDCIFLNKEELEVKVDLLRRQLELLKCVFEEERSQV  
DRQLCDTSVIVKMDNNRDL DMSI IKNVECWYQEI AQKSKEEVD AFYQTRFQELQDKRGKYCDDLQSNKCEISELTRMIQKLQCELENVKKQVT  
CLQTSICDAEQRGDCALKDAREKHIEMQNALQKAKDELACMLRDYQELNVLKALDIEIATYKTLLEGEESRWVTE SLFLFPWMSLQA

>Kiwi\_HBS3

MVGLRGRSCKSEGLCRGHINKNLQPLCAKIDPEIQHIRMQEREQMKSLNNQFACFIDKVRHLEQENRVLATKRDL LQKQVMP SQNKLKHV FDS  
FICSLQRQLD LLLHERGQMEPERNDMEKLV E VFKCKYEQEVTRHTAAKNFILLKDDVDCVYLTAELEAKLET LRQETEF LKCMSAQEIAELE  
KSLCDTSVIVKMDNSRGLAMEGILKSIECRYEDIAQKSKAELNVLYRTRYQELEBAKGRLYNELKSHQQEIEELS FVIQRWRDLENMKKQVSS  
LQTSVCDTEQRGDALCKDAREKHIEMQNALQKAKDELA YMLRDYQELNVLKALDIEITTYKTLLEGEERRGYSIVRGYPRKADGIQGI CIDE  
RLLKPLCVGVDPLEHEIRCQEKEQIKTLNTQFACFIDKKNFP

>Kiwi\_k78LT

MNRQFSRFGDGFSSFSAHCGTLGSGRSSALSRCDDNNRGEERYGGYGYGSRSLHNLGGFWNVSLCGGYRGEGRYGRCLGFGRRHLGTGF  
GRRECPVGA FQGGQAGPGI KEVHVNTSLLRPVHVQIDPEFQVRVRSDEKEQIKTLNNKFASFDKVRQCLEQQNQALMTKWELLQQQSAQPEESRS  
IASFFKSYISSLQRQLETLQNQKEQLDPEAYNMLRFV E DYK KRFEDENKRMCKE EEFVELKKELD SA YMGKMEFDV RV E ILKQELEFLRCLYE  
AELS QLQTVVGN TDVILSMDNHREL NMDGII E EVRREYEGIAQKS KA EVD DMYQGRYQDLQDMVWNYREQLRNSYQEI QELTRIQRLRPEIEI  
IRKKNASLQEAIRDADQCGNSAIKDGHEKLEHALQAKDELARLLHDYQELNVLKALDVEIAMYRSLLEEEETRYVQTIHPG

>Kiwi\_k78L5

MAVDMDELVALVEAMEEELAALEEVSLIQOVKQEKKEIKNLNNQFASFDKVKQPCIGSLPVEALEAGVEGAT ALALPSVVALEEDVDCAYM  
TKVELEAKVGALTDEINFLRAMYEEELAQMQTISRDL SVVSM DNNR YLDLDSII E EVRRQYEQIAQSSRAEAEAWYQSQYEEQLSTAGRHGDN  
LRNTKIEIQELTRNVQRLRTEIESVKKQNLQAAIAEAEER GEMAL K DARAKL E E L E C A L Q D K E E L A R L L K E Y Q E L L N I K I A L D V E I A M Y R K  
LLEGEESRLCGDGI SNVNVSAVGRTTIAGGRAGGF GAGSGMGGGVCVVGGSITGGSCGVGGGILGGGFSSTGGFGAGSGMGGGVCVVGGS I  
TGGSCGVGGGILGGFSSGSRMCSSGGGSGFGPGGGSSVRRCVTTTTVKSSGVKY

>Kiwi\_k78L4

MSRQSVCRSFGGGSRGYS SCSAIGGGFGGGGSRRTSYSSYSTSRGFGGGGRSGGFSRSRLHNI GSSGRIAMGGCYGGGGYGSRMSFGGGFGG  
MGGGGMGGMGGYGGGGYGGGGMGGGGMGGFGGGG MGGFGGGPGFGGPGFGGPGRGGPGI QPVQVXXXXXXXXXPVHVEIDPQIQOV  
KNQEKEQIKTLNNQFASFDKVRFLQEQNKVLETKWELLQEQGSPGRKNDLVIFENYQNLRRQLDSILAQRGQLESELQMQYVEDYKNKY  
EEIINRRTSAENE FVTLKKD VDCAYMTKVELEAKVGALTDEINFLRAIYEEELS QMQTISRDL SVVSM DNNR HLDLDSII E EVRRQYEQIAQS  
SRAEAEAWYQSQYEQQLSTAGRHGDNL RNTKIEIQELTRNVQRLRTEIENVKKQNLQAAIAEAEER GEMAL K DARAKL E E L E C A L Q D K E E L  
ARLLKEYQELLNKIALDVEIAMYRKLLEGEESRLYGE GMSNVNVSVVGRTTVSGRGGMGGGFGGSSGMGGGFGGSSMGGGFGGSSMGGGFGG  
GGSSMGGGFGGSSMGGGVCIGIGGYGGGSGFGGSSGIGGMHSGGFSGSGRMCSSGGGNGFSSGSSSVRRCVTTTTSVKSSGVRF

>Kiwi\_k78L3

MSRQSACRSFGGGSRGYS SCSAIGGGFGGGGSRRTSYSSYSTSRGFGGGGRSGGFSRSRLHNTGSSGRMAMGGCYGGGGYGSRTGLGGGFGG  
MGGMGGFGGGMGGFGGGMGGGGMGGFGGPGFPGGIHPVQVDSALLRPVHVEIDPQIQOVKNQEKEQIKTLNNQFASFDKVRFLQEQNKVLETK  
WELLQQQGPSGRKNDLVIFEDYIQNLRRKLESLVQRGELESELQSMQYVEDYKTKYEEIINRRTAAENE FVTLKKD VDCAYMTKVELEAKV  
GALTEEINFLRAMYEEELS QMQTISRDL SVVSM DNNR HLDLDSII E EVRRQYEQIAQSSRAEAEAWYQSQYEQQLSTAGRHGDNL RNTKIEIQ

ELTRNVQRLRTEIENVKQKQQLQAAIAEAEEREMALKDARVKLEELCALQKDKKEELARLLKEYQELLNKIALDVEIAMYRKLLEGEESRL  
YGEGMSNVNVSVVGRRTTVSGGFGGGSSMGGGVCIGGGYGGGSGFGSSSIIGGGMHSGGFSGSSGRMCSSGGGNGFGSSGSSSVRRCVTTTSVK  
SSGVRF

>Kiwi\_K78L2

MSRQSACRSFSGGSSRRGYSSCSAIGGGFSGGSSRSRTSYSSYSTSRGFGGGRSGGFSRSLHNTGSSGRMAMGGCYGGGGYGSRTGLGGGFGG  
MGGMGGFSGGSGGGMGGGGMGGGFGGPGFPGGIHPVQVDSALLRPVHVEIDPQIQQVKNQEKEQIKTLNNQFASFIDKVRFLQONKVLSTK  
WELLQQQPGSPGRKNLDVIFEDYIQNLRRKLESVQQRGELESELQSMQQYVEDYKTKYEEEINRRTAAENEFFVVLKDVDCAYMTKVELEAKV  
GALTEEINFLRAMYEEELSQMOTISRDLSSVVVMDNRRHLDLDSIIIEVRRQYEQIAQSSRAEAEAWYQSQYEQSQSTAGRHDNLRNTKIEIQ  
ELTRNVQRLRTEIENVKQKQQLQAAIAEAEEREMALKDARVKLEELCALQKDKKEELARLLKEYQELLNKIALDVEIAMYRKLLEGEESRL  
YGEGMSNVNVSVVGRRTTVSGGFGGGSSMGGGVCIGGGYGGGSGFGSSSIIGGGMHSGGFSGSSGRMCSSGGGNGFGSSGSSSVRRCVTTTSVK  
SSGVRF

>Kiwi\_K78L1

MKTLNNKFASFIDKVRLEEQONKVLKTKWLLQEQQHGTGPNKNDQFFEAYVNGLRKQLDGLSNEKHQLEAELKNFQDLVEDFKSKYEEEEIN  
RRTAAENDFVLLKDVGVYMNKVELQANVDALADEINFLKCLYEAEELSQMQQVSDTSVVLSDMNNRKLDLNSIIAEVKAQYEEIAKRSQMEA  
ECWYQCKYEEELQATAGKHGDSLKDTKTEISELNRMIQIRAEIENVKQKQETLQASIVDAEERGEVALKDAKAKLTELALQKAKADLTRQLR  
EYQELMTVKLALDIEIATYRKLLEGEESRMSGECQSAVSICK

>Kiwi\_K8

MSVTVTRKTMSTPIVSGRSFSSHSYTTNPSVVRMSTASVFGAYGGSRYGAGLYRGPAAVPSMGGSSITAVSVNQSLTLPNLEIDPNIQVRKKEE  
KEQIKTYEEEEINHRTEKENEKGWVRRRCGAEELGPHVRRARAQPCVPVPPQELRELQSQISDTSVVLSDMNNRSLDLDSIIAEVKAQYEEIASRS  
RAEAESMYQIKYEEELKTTAGKHGDDLNRTRTEINELNRMIQIRAEIENVKQKQETLQASIVDAEERGEVALKDAKAKLTELALQKAKADLTRQLR  
EYQELMTVKLALDIEIATYRKLLEGEESRLESGMQNLSIQTKTGYSGGYGGGFSGFRSGFDGSGYGGGSGGFGSSFSSTSYSGPPSAL  
ESSAATKSRAIVIKKIEIETRDGKLVSESSDVLPN

>Ostrich\_K80

MTNPCKAFTSGSLCSWEVSGKMSGRKAASSTSSDCQGRSSPTGVASNSCDSLIIHRDGRNHHFSYPSFSDIGRLLVPLHLDIDPDFQARRQKEKE  
DIKLLNNQFVSLIGKVCLEQQNKILTRWNFLKQDQNSHSESDIKAIYDQYMSKMNQEMKALNYERENLELELTKVLDTMDNFRSKYEDEIRL  
CSGMEYFTTELKDLDASSLHRTELEVLLHGLQDMLDLKTIYEQELEELLTEIKDISVVLGIDNTCKLDLSKIVVEVRAQYEAALALRSWEEAE  
SLTRRKLNEGNTQSATYGGHLLDSREIADLNIQIQKLRSCIVSQKSCLYLEENIKEAGEHGMALKDAKAKLVKLEEAALQKSKENMAHLVKE  
YQALMSIKLALDVEILTYRKLMEGEESMESPIPTVISTIHNSPKQSSSALRNSKVFARGTGSTNSETPNPKGGSTKMLPSRSHSNSSAAPEAD  
AYISEAQPKYNSPSIKECS

>Ostrich\_K7

MSRSVSFSRVAVPGVSQMRVSTVSSSTRGGGASFRAGGFRPGLYTRGSASNRISLGRGGSSYSVHSGYGGGLMGFGPAGIQEVNINQ  
SLTLPNLEIDPNIQVRKKEEKEQIKTLNRRFASFIDKVRFLQONKMLETKWLLQDQKTSRNIAPMFEAYINNLRHQLDGLLNDKGRLEGE  
LKNMQDLVEDFKNKYEDEINKRTAAENEFFVVLKDVDAAYMNKVELEAKVDALDDEINFLRSLYEAEELRELQAIQSDTSVVLSDMNSRNLDLDS  
IIAEVKAQYEEIANRSRAEASWYQSKYEAALQVTAQKHGDDLNRKNEISEINRMIQRLQSEIENAKAQRKLEAAISEAEBERELAIKDAKAK  
LEELEAALQKAKQDMARQLREYQELMNVKLALDIEIATYRKLLEGEESRLAGDGFNVNISVVSSSGGGYSSSSGLGGGIGGGLSLGAGMGS  
GALGFSSGGGSKSYTLTTSSTRRSIRK

>Ostrich\_K5L4

MSRQCAVRNQSKIGFSAASAYIPNTCSSTSFCSRVSQGGSCGTTAGFRGYGGGFGSRSLYSLGGCKRISVAGRGGGFGYGPAGFGAGSGIACGF  
GGAAGGAFRFGGGMAGPFPALPAGGIHEVSVNQNLKPLNLEIDPNIQSIRKDEKEQIQTLNKKFASFIDKVRFLQONKMLETKWLLQEQG  
NKTVINNIIEPLFETYINNLRQLNLLADKENLAGELNKVQSLAEDFKNKYEEINKRAAVENEFFVILKKEVDAAAYMTKTELQARLDLVEEID  
FLRALYEAELSQMOTQISDTSVILTMNDRSLDMSIIAEVKAQYEDIANRSRAEASWYQSKYEAALQVTAQKHGDDLNRKNEISEINRMIQRLQSEIENAKAQRKLEAAISEAEBERELAIKDAKAK  
LRSEIDGVKQKCVSLQTAIADAEERGELALKDARAKLAELDALQKAKADLARQLREYQELMNVKLALDIEIATYRKLLEGEESRLAGDGFNVNISVVSSSGGGYSSSSGLGGGIGGGLSLGAGMGS  
NISVTRTGYSGNCLTLGGSSGLGVGGGVCAGGTGFGSSGQGMARSCVGGSSSVKYSTTSSTKRCY

>Ostrich\_K5L3

MSRQSTVRIQRGSGFSTASAVVNTCRTSFSSRSVSQVGGCAGSGFARVGGGFGSRSLYVGGCKRISVAGRGGGFGYGPAGFGGAGSVYGC  
GGGFGMPVNTGYGSAFSGGGMGGPFPAGGIHEVSVNQNLKPLNLEIDPSIQIRKKEEKEQIKTLNKKFASFIDKVRFLQONKMLETKWLLQEQG  
QEQGMKTVRSNIEPLFETYINNLRMQLNLSLSDKGRLEGEELVNTQYLVDFDKKYEDEINRRTVAENEFFVTLKDVDAAYMNKVELQAKADALS  
EINFLRALYEAELSQMOTQISDTSVILTMNDRSLDMSIIAEVKAQYEDIANRSRAEASWYQSKYEAALQVTAQKHGDDLNRKNEISEINRMIQRLQSEIENAKAQRKLEAAISEAEBERELAIKDAKAK  
LVQRLRSEIDGVKQKCVSLQTAIADAEERGELALKDARAKLAELDALQKAKADLARQLREYQELMNVKLALDIEIATYRKLLEGEESRLAGDGFNVNISVVSSSGGGYSSSSGLGGGIGGGLSLGAGMGS  
VPVNISVTRTTIGTYGGGSSVGMGGGVCMSGNSFSCNGPGVSTTLGAGSSSVKVFVSTTSSTRRSYRS

>Ostrich\_K5L2

MSRISFRSSTGGMRGFSGSAIVGGSGGARSSFSVSVSRVGGGRAGGGGFGAGGGFGSRSLYLNKGGSKRISYSSIGGLRSGAGAGYGFGG  
GAGFGVYGGGAGAGFGLGGAGGGGGLGSGFGLGGPFGGRGGPFPVCPGGIHEVTVNQSLAPLKLIDIDPEIQKVRTQEREQIKTLNKK  
FASFIDKVRFLQONKMLETKWLLQEQGQTVTRKSLEPLFEAYINNLRQLDLSLMGERGLDSELNMQDMVEDFKNKYEDEINRRTGAENEFF  
VVLKDVDAAYMNKVELQAKADSLADEINFLRALYEAELSQMQQVSDTSVVLSDMNNRNLDLNSIIAEVKAQYEDIANRSRAEAEAWYQNKYE  
ELQVSAGRHGDDLNRKNEISEINRMIQRLRNEIESVKQCANLQAAIAEAEEREMALKDARAKLAELDALQKAKADLARQLREYQELMNVKLALDIEIATYRKLLEGEESRLAGDGFNVNISVVS  
LALDIEIATYRKLLEGEESRLAGEGVAVSVSVSTSSGMAYGSSSLGMMGGGLCVGGGGGGGGYSLSSGGGSENGGLSYGGGSSFSGSGSR  
GISSTGGSVRIVSKTTTSSKKTIR

>Ostrich\_K5L1

MSMARSGGGGAFFRLSGGGGGGGGSAAGFSRSLYLNKGGSKRISIGVSSFRAAFSGGAGGSSGLGSGGGGSGYFGSGGAGGGLGLGLGGG  
GGGGGGGSGYFGGAGGLGFGGGGGGGGGGGGGVGGGLGQEVNTINQSLAPLKLIDIDPNIQVRRKDEKEQIKTLNKKFASFIDKVRFLQONK  
LETWLLQEQGQKNTGKNLDPLFEAYINNLRQLASLNNRGRMDGELKNNMQDLVEDFKNKYEEINKRRTAAENEFFVVLKDVDAAYMTK  
ELEAKVDALDDELNFRALYDAELAQLSAQVSDTAVILSMNDRDLDSIIAEVKSQYEDIANRSRAEAEAWYQNKYEAALQVTAQKHGDDLNR  
TKGEISELSRLIQRIRSEIENVRNQCATLQTAIGDSEERGELALKDARAKMELEDALQKAKADLARQLREYQELMNVKLALDIEIATYRKLLE  
GEESRLSGLNPIYSYVSSSSGMAGGGGGGGLSLSGGGGGSLGLGGGGGSGFGLGGGAGGNYSGSGGGLGLGGGSLGGGGGGGSGALG  
LGGSSSLGIASGHYGGGGGGGLSTGGGNFSSGSAKTNPGVKIVSKTSSSKSIKSQSLKNAVQPE

>Ostrich\_HBS1

GNSSASVCPVGRRCIGGFFSSRSVCDLGRGQRISFGGSCRSVYGGAGVGRVAYGGGRFVGTVIGFNGCSYGLSRYRGLDGVITIGGY  
SSGVLGAGRSEGRVSIHPELLKPLCVGVDPEECQVTHEKEQIKNLNNQFACFIDKVRFLLEQQNKVLTWKWELLQQVYVLPASRRNLEFPVFE  
NFCINLRKQLECVLGERERLENEERCLRDLDVQEYKCKYEDEINKRTAAENEFVVLKDDVCLYLTKEELEVRVGLLRQQLFELKCIYAEERAQL  
DCQLCDTSVIVQMDNSRDLDMEGIKSVECCYEEIAQKSKAEVAFYQTRLEELHSSRGKFCDDLRRNNQSEIAELNRMIQKLCQESDNVKKQIA  
ALQTAICDAEQRGDCALKDARQKLDLQALQAKDKMACLLRDYQELLNVKLALDIEIATYRTRLLEGEESRICTGNPVSVAVVGSGGTVGECR  
TLSGIGGKCAVKTTGGASSGLGAVSSFGVGGTGFARSVDCLPR

>Ostrich\_HBS2

MVCLHGRSCKSEGLHRVHISENLLQPLYVKIDPEIQHIQMQEREQMNSLNNQFACFIDKVRFLLEQQNKVLETWKWELLQQVYVLPKKGKNELELYFE  
NYICDLRRLDCLLCEKQKLGSEECATSQLVEEFKCKYEEIEINRRTTAENEFVVALKKDADCFILNKGELEVKVDLLRRQLELLKCVFEERAQV  
DRQLCDTSVIVKMDNRRDLDMESIKNVCEWYQEIQAQKSKKEVDAFYQTRFQELQDKRGKYCDDLQSNKCEISELTRMIQKLCQCELETVKKQVT  
SLQTSICDVEQCDCALKDAREKHIELQNALQKAKDELACMLRDYQELLNVKLALDIEIATYKTRLLEGEESR

>Ostrich\_K78LT

MQEVTTNQNFAPLSLDIKPEIWKVQKLEKEQIKTLNNKCTSFVDSRYEEIEISSCLAEDGSVVLKDILPWIQVHVNTSLLRPVHVQIDPEF  
QRARSDEKEQIKTLNNKFASFIDKVCQLERQNALMTKWELLQQCTQPEESRSIASLFRSYISNLQRQLETQNKQEQLDPEAYNMLRLVEDY  
KKRFEDENKHMCKEEEFVELKKELDSTYMGKTEFDVVRVEILKQELEFLRCLHEAELSQLQTVVGNIDVILSTDNHRELNMDGIEEIRREYDG  
IARRSKAEVDAMYQGRYQDLQNMVNVHREQLRNTYQEIQELTRHIQRLPEIEIVRKNNTSLQEAIKDADQRGNSAIKDGQEKLDLEHALQQA  
KDELARLLHDYQELLNKALDVEIAMCRSLLEEEETRIQGSPTRI SVAALLEGGGHPLEVEEAAQVTVVVALLEEEEAATGLRVEAMGLEEEEA  
LVVGAPALAVEDPPLEGEAMGLEEEEALEEEEGDMGLEVAVVLTGVV

>Ostrich\_K78L

MSRQSI CRSFGGGSKRGYSSCSAIGGGFGGSGGRSRIYSYFSFSTRGTGGGGHCGGFSRSLHNMGGSGRISLGGSYGGYGCRIIGGGFGGSGYGG  
GICSFGGGVIIGGGIGSFGGSVRGGPGFPGGIHPVQVDPSSLRVPVHVEIDPQIQVVKCQEKQIKTLNNQFASFIDKVRFLLEQQNKVLTWKWELL  
QQQGTGPRKNLDVLFENYIQNLRRKLESLVGQRGQLESELQSMRQYVEDYKTKYEEIEINRRTAAENEFVVLKDDVCA YMTKVELEAKVGALT  
DEINFLRCIYEEELSQMOTISRDLVSVVSMDSRHLDLDSIIIEVRRQYEQIAQNSRAEAEAWYQSRYEELQSTAGRHDGSLRNKIEIQELTR  
NVQRLRTEIENVKLNQQLQAAIAEAEERGMALKDARKLELESAQDKDELARLLKEYQELLNKIALDVEIAMYRKLLEGEENRLLCGDN  
LSNVNVSVVGRRTIAGGRAGGFGAGSGMGGVCAVGGGSCVGGGILSGGFSSGGGFFASSGSSSVRRCVTTTTTKSSGVKY

>Zebra\_finch\_K80

MTNPSSAFSSGSLSSGEAAARMSPDGGASDGHGVSVDGHGVSVDGHGVSVDGHGVSVDGHGSPGSHGHGSPGSHGHGSPGSHGHGSPGSH  
GHGSPGSHGHGSPGILQSSPGSDGHGSPGSHGHGSPGILRSGPGILRSGSPRSPPLPGQGLPPAVRLDIDTEFQAVRQEKEDIKVLLNNQFVTLI  
EKVQSLQKQKILITTRWNFLKQDQNSHSDSDIKAIYEQYVSKMNQEMKALNYEQENLESELTKVLTMDTFRSKYEDEIRLCSGMEFTFMELKK  
DLDVSTLHRTELEVKLGLELLELKKTIYEQLELELLEIKDISVVLGIDGCSRDPDLGRIVEDVRAQYEAALALRSWEEAEALTRKRLTDSSSQ  
SGSFGHLLDSREIADLNIRIQKLRSCIVSQKSQLYLEEHIREAQVEGQESTRLDAKAKVAGLEEAALQRSREHMAQLVREYQELMNKIALDVE  
EILTYRKLVEGEENSMEQPIPTVISA VHSRPKPLSASTLRNSRLFAQSGHVEPSRGGPGRAQVDPGTAATRTQPKFSSGAAGECS

>Zebra\_finch\_K7

MSRSVTFSSRSAAAGPALSQLRVSVSSGRSSALGRGFGSASLYSLGSAGRAS PATGSSFGARSYGFGGSLSPGGIQEVTVNQSLTPLNLEI  
DPSIQVRKEEKEQIKTLNNKFASFIDKVRFLLEQQNKMETKWSLLQEQKTTNRNIAPMFETYISNLRRQLDGLADKGRLEGEELKNMQDLVED  
FKTKYEDEINKRTAAENEFVVLKDDVDAAYMNKVELEAKVDALDTEINFLRAFHEAELNELQAQISDTSVVLSDMNSRNLDLDSIIAEVKAQYE  
EIANRSRAEAEASWYQSKYEAALQVTAGKHGDDLNTKNEITEINRVIQRIQGEIENAKAQRAKLEAAVAEAEERGMALKDARAKLEEAALQK  
AKADMARQLREYQELMNVKLALDIEIATYRKLLEGEESRLAGDGVGNVNI SVVSSSGGGYSSSSGFLGAGIGGGLSLGSGMSSGALGFSSGGS  
TKSYTTTTSSSRVRK

>Zebra\_finch\_K5L4

MSRQCTVRSRLGRTSFSAASACIPNASSSLCLRVPVQAGSCGATTGYGRFIFGGFGRSRLHSLGECQRISVAGRGGVSYGPAGFGTGTGISYGF  
GAVAGPFGGPGFPVAVVGGIHEVSNVQSLKPLNLEFHPKIKSIRKDEKDIQTLNNKFASFIDKVRFLLEQQNKVLETWKWELLQEQNKTV  
RKNIEPLFDTYLNNLRRLHSLMTDKENLAGELSKMHSIAEDFKNKYEEEVNKRADVENEVFTLKKVEDTAYLDKTKLQARLDSLTEEIDFLRA  
LYEAELSQIQSISDTSVILTMDNRRNLNMEGIIAEVKAQYEEIANRSRAEAEASWYQSRYEELQATAGRHDGDDLNTKQEI SELNRHIQRLRSE  
IDSVKKQVTAQTAITDAEHRGELALKDARTKLEDLETALQKAKADLARQLREYQELMNVKLALDIEIATYRKLLEGEESRLAGDGVGNVNI  
TRTTSGMGGYGRSCLSPSSGAGGEVCAGMGMYISGSGYGTGGSGVGGSSSSFKSISTSSSMRGY

>Zebra\_finch\_K5L3

MSRQSTVRIQRGRSGFSAASAMVNTCRTSFSSCVTRLGSCNAGSGFARVGGGFGSKSLYNVGGCKKISVAGRGGSFYGSAGFGGGTGSVYGG  
FGGAPANLQYGYGAFGGGPGFPAGGIEHVSINQSLKPLNLEIDPNIQIRIREEKEQIKTLNNKFASFIDKVRFLLEQQNKVLETKWSLLQEQGM  
KTVRNNEPLFETYINNLRVQLNSLLDKGRLEGEELVNTQYLVEDFKKKYEDEINRRTIAENEFVTLKDDVDASYMNKVELQARADALSEEINF  
LRALYEAELSQMOTISDTSVILTMDNRRNLNLDLSIIIEVKAQYEDIANRSRAEAEASWYQTKYEELQATAGRHDGDDLNTKQEI SELNRHVQRL  
RSEIDSVKKQCANLKAADAERGELTLKDAKAKLALEDALQAKADLARQLREYQELMNVKLALDIEIATYRKLLEGEESRLAGDGVGNVNI  
SVTRTTVTGTYGGGSLSMGNSFNCGSVPGVGTTLGAGSSSMKFVSSSSTRSYRS

>Zebra\_finch\_K5L2

MSRISFRSSTGGGMRGFSGSAIVGGGGGTRSSFSSVSVRVGGGRAGGGGFGAGGGFGRSRLYNLGGSKRISYSSVSGGLRSGAGGGYSFG  
LGYGGGAGAGFLGGAGGGGYGVSGFLGGPGFGRGGPGFPVCPGGIHEVTVNQSLLAPLKLDDIPEIQKVRTQERQIKTLNNKFASFID  
KVRFLLEQQNKVLETKWTLLQEQGHTVTRKSLEPIFEAYINNLRRQLDSLMGERGLDSELRSMDMVEDFKNKYEDEINRRTGAENEFVVLKDD  
VDGAYMNKVELQKADALADEINFLRALYEAELSQQMQVSDTSVVLSDMNNRNLNLDLSIIAEVKAQYEDIANRSRAEAEAWYQNKYEELQVSA  
GRHGDLLRNTKIEISEINRMVQRLRNEIDSVKKQCANLQAAIAEAEERGMALKDAKAKLTELEDALQKAKADLARQLREYQELMNVKLALDIE  
IATYRKLLEGEESRLAGEGVAVSVSVSSSGMGYGGGSLGGLMGGGGSSSYTMSSSGFGGGGSGGLNLYGGGSSFSGSSRGIS  
SSTGGSVRIVSKTTTSTKTIIR

>Zebra\_finch\_K5L1

MNRTLMSRAGGGGRSYSAASAIIPSSNRAGFSSVSVARSGGGGGFGRLIGGGGSSSGGGGFGSRLYNLGGSKRISIGVSSFRAAFGSGA  
AGGSGLGGGGVGGWGLSGGAGGGLGLGLGAGGGGFGGGAGGLGYGGYGGGGGFGPGLGLGGFPVGLGGGRNPVFGSGGPGVGTIQE  
VTVNQSLLAPLNLEIDPNIQVVRKDEKEQIKTLNNKFASFIDKVRFLLEQQNKVLETKWTLLQEQGQKNSGKSNLDPLFEAYINNLRRQLANLL  
NERGRMDGELKNMQDLVEDFKNKYEEIEINRRTAAENEFVVLKDDVDAAYMNKVELEAKVDALSDELNFLRALYEAELAQLSAQVSDTAVILSM  
NRRDLDLSSIIAEVKAQYEDIANRSRAEAEAWYQTKFEELQATAGKHGDDLNRNTKGEISELNRLIQRIRSEIENRTRNQCATLQTAIGDSEERGE  
LALKDAKAKMIDLEDALQKAKADMARQLREYQELMNVKLALDIEIATYRKLLEGEESRLSGEGLNPIISYVSISSGSIAGGAGLGGGFGGLSLS





SRAEAEAWYQSQYEQLOSTAGRHDNLRNTKIEIQELTRNIQRLRAEIEVKKQNNQQLQAAIAEAEEREMALKDARLKLLEESALQKDKKEEL  
ARLLKEYQELLNKIALDVEIAMYRKLLEGEENRLCNDTMSNVVSVVGRITTVSGRRGMMGGGFGGSGMGGGFGGSGMGGGFGGSGMGGGMMGG  
GGICGGSSFGGSGMGGSCMGGGMYAGGFSSGSRMCGSGGGSSSVRRCVTTTSVKSSGVRF

>Zebra\_finch\_K78L1

MTSPLPFGTDQLPVIKRGTOQLLPQDLALLASQAPASAFCEFWGLFTMSRQSCALGRGFSSSSSVFSGSKNVMFVSGVPRGGCRGSGAAGGFS  
SRSLYSLGGTKSTSLGGFGGAGACRGFGGAGAGFGGGYAGCFGGGPGSGFGGGFDGGMGGQGFPPCPPGGIREVTINQSLLAPLNLEIDPE  
IQKVRTQEREEIKKLNDFKASFIKRVRFLEQQNRVLETKWKLLEQGGTGTGSRNLDPPFFETYISGLRKQLDCLSSSEKQLQELTELKSFQDMVED  
FKTKYEEIEINKRTAAENEFVLLKDDVDGAYMTKVELQKGLDLSDEINFLKCLYEAELSQMQQVSDTSVVLSDMNNRSLDLDLSIAEVKAQYE  
EIANRSRLEAESWYRCKEYELQATAGKHGDSLKDKTIEISELNRVIQIRAEIESVKKQCETIQTSIADVEQRGEVALKDARDKLALELETALQK  
AKTDMARQLREYQDLMNVKLALDVEIATYRKLLEGEECRMSGECQSSVSI SVVGGSSSVSGSYGSGMCLGGGGIGFGSGKSCSMGGAGLCSL  
GGSGFAGGGFGLSGLSNSVVGSGTVLKNSGPTSRP

>Zebra\_finch\_K8

MSVSIQRQPLRSSAVPGRSFSRSFTAGPVLGPGYGLRGGSGGLGGPSWVPGAGGGITAVTINRSLLAPLDVAVDPELQELRREEKEQIKTLN  
DKFAAFIDKVRFLQONKLELTKWGLLRQPPRSALGGLLEGYAGTLRRQLEGLGQERQLRAELSHVRGLVEEFKAKYEEIEINHRTEKENE  
VLLKDDVDDEAYMSKVELESRLESLTDEINFLRQLYEEELQELRAQVSDTAVVVSDMNSRQLDMAGVLAEVRAQYEDIAGRSRAEAGLYQVKYE  
ELKTAAGKQGGDLRQTRSQIQELNRRIQRIQAEIEALKNQRSGLEAAVAEAEERELALRDARAKLAGLEGALAQAKQDLARQLREYQELMNVK  
LALDIEIATYRKLLEGEESRLEAAVQNLISHTKTSGYLGGFGGGFGGGFGGPFSTVSVSSGYVPPPPPESTAPLKSRAIVIKKIEIETRDGKLV  
ESSDVLES

>Nanorana\_K80L

MASFSNAFSYDVPVQSLNGQNHPSPALSETYATESCTTTTNGSHASQSFEEVFKSKLMVSDTQTTVSQDDAEAKLSSALMSFRDKILY  
LEKQRELLQERWSIVQVEDTSEIDLEPIYLSYISRLLAQVNSVNKQNNQTQSSVLDMMDSINAIKDKYEDFNTRTDMEYAFVDLKKDVEDACSM  
DKTELEVQRHLHDFIELLTTIYEHELKEVMEESSGDISVLLNMDSGCPLNFQNI VKEIKERYESIAAKSREEAQAALSKKLQQGVLAGRYETE  
LENSRSQISQLNSQIPRLRSEVLSVQTQCMNLEQKQVSVAKMKSSAALKDANAKLAEVQEAALQKAKQDVARLIREYQDLMNVKLALDIEI VTYKK  
LLEGEIEIRLNSPTVVNVHCETEVRPQRSRNSSSSWSVHSSKSDY

>Nanorana2\_02

MSYQKGFSTRSAIPQGGVSSVRSIQTRTSSGAGLGRPANWSSSSLSNVGSRKSVSYGVSSGRSGVGGGSLYIGIGGGSGFGGGGGYGGGQGT  
GPGIHEVTINQSLLAPLNLEIDPNIQVVRKEEREQIKTLNKKFASFIKRVRFLEQQNKVLETKWDLQNKSSKASNIAPMFEAYIANLRRQLD  
TLINDKGRLDGEFRNQDLVEDFKNKYEDEINRRTAAENEFVLLKDDVDGAYMKNVLEAKVDALDTEINFLRALYEAELRELQAQISDTSVVL  
SDMNNRDLNLSIAEVKAQYEDIAAKSRAEAEESTYQYKQELQATAGRHGDDLRTKTEISELNRAIQRLQAEIENVKAQRAKLEAQIAEAE  
RGELALKDASGKLEELQAALQKAKQDMARQLREYQELMNVKLALDIEIATYRKLLEGEESRLAGEVGVAVSMVNSSSSSGGYGGSSFGGGS  
YGGSSLKFGSGGGSSSISYAMTTSSSSKSSMRY

>Nanorana2\_03

MTHKQYRKSQVNRNFSSSSLCAPGNASGFSVSSYRRGPFSGRSRLYNAGSLGGRMSVASYHPVRGSGYGGGLGSLRVRGGAGSAFSCRVGGYSG  
GGVGGGFGAGGYPVGGGFGVGGGIGGYGAGFSPVGI TPVTVNQNLTLPLNLEIDPNLHSLRKEEKEQIKTLNRRFASFIKRVRFLEQQNKML  
ETKWTLLQEQKTVKSHIEPYFEAYLNNLRRQSEGLGGEKARLEAELKMNQDQDVEDYKNKYEDEINKRTAAENEFVLLKDDVDGAFMKNADLEAK  
VGMRLDEINFLQQIYQIEIDQLHAQISDTSVSVSDMNSRDLDMESIIAEVKAQYEDMAKKSRTAEASWYQTRYELRISVGKHGDDLRTKNEI  
AEHNRMSRIKGEIENVKSQRAKLEAAIAEAEERGEAAIRDAKNKLVLEDAALQKAKKEMARLLRDYQELMNVKLALDIEIATYRKLLEGE  
MAGDGGSVSISVSSSTGGVIGGGYDGGSGFYHGGSGFSSGSRGLAGSRFSSGSTMSSSGGYITGGIHSSTGGTVHPGGYSSGGSSSVN  
VTKTSSTRKI

>Nanorana2\_04

MKQKDPEDLKVGLKLSKEGETVGSRKS GGEGKRRKLPTRFRDTEKAGPGAVGGAKEPMKHGGVVRGALLRDREAIWRQAIPIITFNMTGGIKA  
TWYEQFWFKTAGPELSRERASLGLLARKRETAETATKCPALTCLSLVTISASVRAFRI SRTLIDVCEAAGRNGDIATGRPPVSLRETYHV  
TAALSKYFDLMSRWPNLMNEEERSAARPRTGCCNSGSPCSKMSVGSFHLGKAGHGHGHGFHDFGGSYSGGITPVTVNQSLAPLNLEI  
DSNIQVRVTEENKQIKGLNKKFASFIKRVRFLEQQNKMLETKWDLLEQKQARQIEPLFEAFIGNLRRHLDLSECESARLEAERSMEDMMEG  
FRKRYEEEMNRRTAAENEFVLLKRDVDAAFMNAELQAKADALDTEISFLRGLYDAEISQLQAQISDTSVIVSDMNSRDLDLDSIAEVRAQYE  
EIANRSRAEAEAMYQSRFDDLRMASGRNNDLESRNEIAELNRAIQALKEIVCAKSRQAALAAINEAEERGEAAIRDAKNRAIQALKEAALQK  
AKQDMARQLREYQELMNVKLALDIEIATYKMLLEGEHRLTSDGNVNICK

>Nanorana2\_05

MSVGSYCSGKSGHSGSGFIVGLGRGVGGQCGGITPVTVNQGLLAPLNLEIDPSIQRVRTTEEKDQIKGLNKKFASFIKRVRFLEQQNKMLETKW  
LLQEQRARCQIDPLFEAFISNLRRQLESLECEGARLAAERNMSEGTVEELKRYEDEVNRRRTAAENEFVSLKRDVDAAFMNAELQAKADSLT  
DEINFLRRLTYDAEISQLQAQISDTSVSVSDMNSRDLDMGSI IAEVRAQYEEIANRSRAEAEAMYQSRFEDMRMAAGRNGDLQNSRNEIAELNR  
TIQRLRGEIECAKSQRAALESASEAEERGEAAVRDAKNKLALEAALQKAKQDMARQREYQELMNVKLALDIEIATYKMLLEGEYRLASDG  
HVNLFYTPALEENTIRGDMEDTMDNNTI I IKEDSPRSAMSPK

>Nanorana2\_06

MSVGSYCSGKSGHSGSGFIVGLGRGVGGQCGGITPVTVNQGLLAPLNLEIDPSIQRVRTTEEKDQIKGLNKKFASFIKRVRFLEQQNKMLETKW  
LLQEQRARCQIEPLFEAFINLRRQLESLECEGARLAAERNMSEGNVEELKRYEDEVNRRRTAAENEFVSLKRDVDAAFMNAELQAKADSLT  
DEINFLRRLTYDAEISQLQAQISDTSVSVSDMNSRDLDMDSMIAEVRAQYEEIANRSRAEAEAMYQSRVSDLRMAAGRNGDLQNSRNEIAELNR  
TIQRLRGEIECAKSQRAALESASEAEERGEAAVRDAKNKLALEAALQKAKQDMARQREYQELMNVKLALDIEIATYKMLLEGEYRLASDG  
HVNLFYTPALEENTNRGDMEDTMDNTI I IREDSRPRAMSPK

>Nanorana2\_07

MSVGSYCSGKSGHSGSGFIVGLGRGVGGQCGGITPVTVNQGLLAPLNLEIDPSIQRVRTTEEKDQIKGLNKKFASFIKRVRFLEQQNKMLETK  
WGLLQEQRARCQIEPLFEAFISNLRRQLESLECEGTRLAAERNMSEGTVEELKRYEDEVNRRRTAAENEFVSLKRDVDAAFMNAELQAKANS  
LTDEINFLRRLTYDAEISQLQAQISDTSVSVSDMNSRDLDMGSI IAEVRAQYEEIANRSRAEAEAMYQSRFEDLRMAAGRNGDLQNSRNEIAEL  
NRTIQRLRGEIEFAKSQRAALESASEAEERGEAAVRDAKNKLALEAALQKAKQDMARQREYQELMNVKLALDIEIATYKMLLEGEYRLAS  
DGHVNLFYTPALEENTIRGDMEDTMEETMDNTI I IREDSRPRAMSPK

>Nanorana2\_08

MLGMATRYNIPSPVQVPIVLDQKDIRCQSEVIVQEKVMDLVLVGLVVELEDNVEESPLLLFVQTVGNIVGLGRGVGGQCGGITPVTVNQGL  
LAPLNLEIDPSIQRVRTTEEKDQIKGLNKKFASFIKRVRFLEQQNKMLETKWGLLQEQRARCQIEPLFEAFISNLRRQLESNHNWVVICPVNTF



MNAVTSGRITMMSHIQRSAGATKPKASAGDFCGAKGFSSCSTGGGYGKANYSSSSLIRSGGPGSYSVRLGAGRSNYGTSSLYCSGGSKRISIATG  
TNGGISTVKGKLSFSGERFPLCRGGIQQNVTVNQILLQPVKADIDPNFQKVRIOEREQIKTLNKKFASFIDKVRFLQKQKILETKWKFMEQES  
KLANMKDNKIPLFEVYISCLQRQLDITKNEKCRLEGDLKNNMQDVVEDFKAKYEEIINKRANAENEFVSLKKDVSLEYMQKTDLGKQDALVDE  
LNFLKTLFDAEVAEMQARISNTNVI LTMDDNRRDLDLGVDVVAEAKAQYEEI AARSRAEAEESNYARQFQQLKDTLGQHGDNLDHRNEIQELNGMI  
RRLHGEIDCVKQIQICALETAISDAEGRGEVALKDAKAKLSELEAALQKAKEDLAVQLRNYQELLNVMKALDLEIATYRKLLEGEECRIHGEVDN  
NVTMSVYSSAGKVAIPSLSCVAGSCSVPRSSAAGAGYSSILKSSNTGASGCGTGTCHINSKVANATGGITALLSTHTTKRAY

>Nanorana2\_19

MLYEEEINKRANAENEFVSLKKDVDCLYMQKTDLGKQDALVDELSFLKTLFDAEVAEMQAQISNTNVI LTMDDNRRDLDLGVDVVAEAKAQYEEI  
AARSRAEAEESNYARQFQQLKDTLGQHGDNLDHRNEIQELNGMIKRLHGEIECVKQICALETAISDAEGRGEVALKDAKAKLSELEAALQKAK  
EDLAVQLRNYQELLNVMKALDLEIATYRKLLEGEECRIHGEVDNVTMSVYSSAGKVAIPSLSCVAGSCSVPRSSAAGAGYSSILTSSNSGASS  
CGTGTCTNINSKVANATGGITSLMSSTRSKRAY

>Nanorana2\_20

MSNLKMQSGGGGSRGFSVCSLGGGRSGGRSSSFASQSLHNAQCLGGRKRTSVASSVRVGSYGGGAFGGSGGGGAGGYGGGSGGYGGGAG  
GHGGGAGGGGGAGGGGGAGGYGGGSGFGGGVGFGGGAGGYGGGQGGDPGFVCPGGIQQVVSINQSLKPLNVEIDPNIQKVKTEEREQIK  
TLNKKFASFIDKVRFLQKQKILETKWHLLEQEGSGKSGKNNLEPLFENFINILNRQLDLSLSEKGRLDNDLKGQEMVEDYKYYEYEDINKR  
TAAENEFVVLKDDVDAAFMVKTDLEIKVDLYTDELNFLRITLYDAVRMPSNVFKHTMSGQVSVNSVSVVGGGSSAGGSGFGSGYVGGGSGYGV  
GGGSGFGVGFVGGVGGGSGYVGGGSGYVGGGNCYVGGGQGSNGYNQSSSTKSSVAVSKTVTSSVKQSY

>Nanorana2\_K8

MSIKMSKVTYRTSSSAVPRSSGFSFSSYSGGPVGARASTGFSFLGSSYGGGARFSGSYRTAYGGGAGAGSAGITHVSVNQSLAPLNLEIDPN  
IHIVRTQEKQIMTLNKKFASFIDKVRFLQKQKILETKWGLLQNKITRSNIDGMFEAYINNLRQLDLSLQEQKORLESELGNMQGLVEDFKN  
KYEDEINKRTEMENDFVLLKDDVDEAYMNVQLEARLESLETDENFLRHYEELRELSQISDTPVLSMDNRRDLDSIAEVKTYEEIA  
NKSRAEVEGMYQLKYQELQASAGRHDLDLNTKTEISELNRYITRLQSEIDSLKQARANLEAQIAEAEERGELAMKDARSKLNELEAALQKAKQ  
DMARQLREYQELMNVKALDIEIATYRKLLEGEESRLESIGQNLISQTKTTSVSSYSGGLQSSYTGGLQSSYTGGLQSGYGGGLGSSYMYASSA  
NSSPLETSRTRKRSIVVKTIVETKDRVLSSESSDVFSK

>Axolotl\_K8

TAVSVNQSLAPLNLEIDPSIQEMRTQEKQIKTLNKKFASFIDKVRFLQKQKILETKWGLLQNKITRSNIDGMFEAYINNLRQLDLSLQEQK  
KMKLENELGNMQGMVEDFKNKYEDENKRTAENEFVLLKDDVDAAFMNVQLETSVDALSDEINFLRGYEMELHEMOKAVTDTSVVLSMDNRR  
RSLDLSIIADVKAQYEEIANKSRADAENMYQIKYQELQTSAGRYGDDLSTKNEIAEMNRGINRLQAEIDALKNQRANLDAIIAEAEERKLA  
VADARSKLAELEAALQKAKQDMARQLCEYQELMNVKALDIEIATYRKLLEGEENRLESIGMNVNIQTKTSAQVNSAYGGSGYGGGSGYGGG  
GTSFGGSGFSNAFSGGSYAVNASPLESSRTKRTVLVKTVETKDGKVTSESSDYFNKP

>Axolotl\_K7L

VTFNQSLTPLNLEIDPTLSDVRKEEREQIKTLNKKFASFIDKVRFLQKQKILETKWELLQNKQSSKTSNI PAMYEQYINNLRQMDGLCNDK  
GRLDGELRNMQDMVEDFKNKYEDENKRTAENEFVLLKDDVDAAFMNVQLETSVDALSDEINFLRGYEMELHEMOKAVTDTSVVLSMDNRR  
ALDLSIIAEVKAQYEDIANRSRTEAESHYQSKYQELQENAGKHGDLRRTKNEISELNRMIQRLQAEIENVKKNQRKMEGSIACEERELAL  
KDAREKLAELAEALQKAKQDLAQARDYQELLSCKLALDIEIATYRK

>Axolotl\_K5L1

VTINQSLSPNLNLEIDPTIQVRTEEREQIKTLNKKFASFIDKVRFLQKQKILETKWLLQEQGHKTKSNVEPMFETYINNLRQIDALGNE  
RHRLDADLRNMQDMVEDFKNKYEDENKRTAENEFVLLKDDVDAAFMNVQLETSVDALSDEINFLRGYEMELHEMOKAVTDTSVVLSMDNRR  
RHLNLSIIAEVKAQYEHIANSTRIEAETWYQTKYEELQSSAGRHDLDLSTKAEISELNRMIQRLRSEIDNVKQCEKQLQHAISEAEERGELA  
LKDARKKLADLEAALQKAKEDMAHQLRDYQELMNVKALDLEIATYRK

>Axolotl\_K5L4

VTINQSLSPNLNLEIDPEIQKVRTEEREQIKTLNKKFASFIDKVRFLQKQKILETKWDFLQEHGQGGSKRDNLEPMFEAYCENMRRQVERLT  
SDRSRLDNEHRNMQDMVEDFKNKYEDENKRTAENEFVLLKDDVDAAFMNVQLETSVDALSDEINFLRGYEMELHEMOKAVTDTSVVLSMD  
NRRSLDLSIIAEARAHYEDIANKSRAEAEESTYASKFQQLQAAAGQHGHDHLKSSKTEISELNRITQRFKAEIESVKKQCANLQTAIAEAEERGE  
LALKDARKKLAELAEALQKCKEEMARQLKEYQDLMNVKALDLEIATYR

>Axolotl\_K80L

EVRDLERQNKILEAQSLKDRNSYKSNANQIMQVSSNNLKQKIDNLLREKEKLETELANMEALLKDLKNRYEDEINRRNQLENDVLTKKDLD  
DYLQKVDTESKLDSTSDENYLRQLFDEEIRELESQVHNAEITVELDNTRELEMKQVMEEVKQYQAMAQKQQAEEHMYKSKLDDIANEAQR  
HNEDLKNVNEISELTRIQRGNGEIDALKNQRNTLENAIGMAEDKGEQAMRNTKDNIELEEALKRAKQDMAGKVREYQDLMNTKLALDIEIA  
TYRKLLEGEETRLIGPAVQTMYSVAVDRLAGSLMQLDLPISMASTNVSSGFSAPANTNVSFNYSA  
PVSANPAPTKPKVMIKTIETVNGQRISSESS

>Axolotl\_K5L2

TQVTVNQSLLPVYTPDFDHTVSDVKKKEEREQIKTLNKKFAAFIDKVRFLQKQKILETKWDLQGGGKTGSTSKSNIDPLFEAYISSMRRQLD  
GLNNDHGRGLDGLRKTQDVEDFKNKYEDENRRTAENEFVLLKDDVDAAYMNVQLETSVDALSDEINFLRALYETELAEVQGNATD TAVIL  
SMDNRRNLDLKSLIADVKSQYEAIALKSSQQAEEAGYQYQQLQSAALQYGDGAKTTKSEISELNRMIQRLRAEIEENVKQCANLQTSAAEVED  
RGEHALQDARSKLNELEAALQKAKQDLALQLRDYQELMGIKALDMEIATYR

>Axolotl\_K5L3

VTVDPQLQTPFNVEIDPEIQKVRTEEREQIKDLNKKFAAFIDKVRFLQKQKILETKWLLQEQGGITTSQSRDNIPIFEEYISNLRQQLLEGL  
NGDRGRLDGELRMTQDMVEEFKQKYEENRRTVAENEFVMLKDDVDAAYMAKVELESKVDITSDETSFSRTFLDAELSQQAQISDTSVILSM  
DNNRVLDLSIIAEVKSQYEEIANRSRNDALTYRFKYEELQSSADQHVLDVLRNTKNEISELNRMTQKLVKVEIENVKQKISKLQTAITEAEERG  
ELALKDAKEKLSDEAALQKAKEDMALQREYQELLNKLSLDEIATYRK

>Caecilian\_K8

MSLVTKKQYRMSSSGPRPAGGFSFSSSPAIGSRVSTAPFALSTAGSRYGSGYRLGYSGPAAGAGGITAVTVNPSLLAPLNLEIDPTIQHVRT  
QEKDQIKTLNKKFASFIDKVRFLQKQKILETKWLLQSKVTKSNTDGMFDAYICNLRQLDALGQEKFKLEAELSNNMQGLVEDFKNKYEDEN  
NKRTMEMENDFVLLKDDVDEAYMNVQLESRLLEGLTDEINFLRQLYEELRELSQISSETAVVLSMDNRRNLDLDSIIADVKAQYEDIANRSRAE  
AEKMYQIKYEELQVSAGRHDLDLRTKSKQIAEMTRMITRLQSEIDALKQRTNLEEAIKEAEEQGEALALKDARGKLALEETALQRAKQDMARQL

REYQDLMNVKLALDIEIATYKLLLEGEENRLESQMTMNVTQTKTYSGLLSSAFSGSGGYVSGGLSSAFSGSGGYFPTNNYIVNSSPLESTKTKTKRT  
VVVKTVETKDRVLSESSDVFSKP

>Caecilian\_K80

MAFSFSESEAFSERRNLSDFTTSTPEMNGYTAGASVNGEADSRSSSTYSHSSAITHVTEHKTQLKSSLLKRSSTTKRVTIQEKGTEETESLNDKLN  
SFTEKQLILEQQKQMLEDRWTHLQEQEISQSNQIDMEPLYQTYISKLLKDVTKINKENNDIQSKLTGMMDSDVDFKDYEDFNTRIDLEYSFV  
QLKKDLDSISLNDTQLDLETQVNEVQGTIQLMKSIYEEEMKDLKNNIKDISVLEMDNRCTVDLEGIKVDVREYEAIAAKSREDAEALCKAKLINE  
KAAKAGKYGNLDIKRSRSDITDLNMKIQKMRSEMLAMQDQSIHLENAITESKENGESATKDAEAKLAELESALQKAKQDIARQVREHQELMNIKL  
SLDMEIVTYKLLLEGEESRMQVPTAAIISVQGTGPSRSLQKGRASEWEGRPNPEPRKKNHSKNLLIKAIEHHTQVHSK

>Caecilian\_K7L

MSFSQRSVITYSSGGVVRGGGFTAGSAIPGIRQVRVSYAYSSSGGSGFARPGSFTSSSLQNFSGTSKRISYGVGSRPGLGFGGGAAGFGGGFVG  
TGLVPGQGIQVFINQNLTPMNLIDPSIQIVRKEEKDQIKTLNKKFASFIDKVRFLQEQNKVLETKWELLQNKTSKTSNVCPYFETYILLNL  
RRQLETLANEKRLGELKMNQDMVEDYKKNYEDENKRTTVENDFVVLKDDVDAAYMNKVELEAKADSLNDEINFMRALCEAELRELQTIQISD  
TSVLLSMDNRRALDLSIIAEVKAQYEDMNVKSRAEAETLYQHKEYEELQMTAGRHGDDLRNTKTEISEMNRMIQRLQAEIENMKQRKLEASI  
AEAEERGERLALNDARSKLAELEAALKKAKEDMARQLREYQELMNVKALDIEIATYKLLLEGEESRLTGDGVGSVSVVNSSMGSSGLGGGSG  
YGVSFSGMGSSGLNFGGGIGGGSGAMKYSVSTSSSRSSYKR

>Caecilian\_K5L1

MSFYHQSTSGSSTRKGFSSASSAIIIPGTRTSYSSVMSRSGGGGGGSGFRVGGGAQSFGRSRLYNVGGSNRISIGGGIGSRYGSAGAASGLGWG  
GAGGSFVLGNAPFGGSPGFPVCPGGIKEVTINQSLAPLNVEIDPAIQIRIRTEEREQIKTLNKKFASFIDKVRFLQEQNKVLETKWNLLQEQG  
HKTTKANTDPLFEVYITNLRRLQLES LGNDGIRLQSDLRVQDGVEDWKNKYEDENKRTAAENEFVVLKDDVDAAYMNKVELESKADALDDELN  
FLRNLHEAELQMQTQISDTSVLSMDNRRALDLSIIIEVKAQYEDIANRSRAEAESWYQTKYEELQVAGRHGDDLRNTKTEISELNRMIQRL  
LRSEIDNVKQIANLQAAIADAEQRGELAIKDAKNKLALEEDALMKAKQEMANQLREYQELMNVKALDVEIATYKLLLEGEESRLSGDGVGAV  
SISVNSSSGSGYIGGGSGLGFGGGMLGGSSISTGGGRIGGYTSSSFSGGGGGSSVKIVTKSSSHSRF

>Caecilian\_K5L2

MNRKVFSSRSVAVGGRSFGSGASISQGGPRFSQGNVSSRSLHELGGTKKISCSVAGNAPSVFASRGSYGVASGFGAGGFGGAGGGGGAGG  
FGGGGLFGGGGPGFPVCPGGIQEVTINQSLAPLNLEIDPTIQRVTRTEEREQIKTLNKKFASFIDKVRFLQEQNKVLETKWNLLQEQGQTT  
TTRNRLEPYFESYIANLRKQLDGLQNDKNRDLGELRNMQDSVDDFKNRYEDENKRTAAENEFVVLKDDVDAAYMNKVELEGKLDALDDEIN  
LRSLYELEIGNMQTQIADTSVLSMDNRRALDLSIIIEVKAQYEDIANRSRAEAESWYQTKYEELQVAGRHGDDLRNTKTEISELNRMIQRL  
RAEIEENVKHCANLQNSIAEAERGERALKDARDKLALEAALKKAKEDMARQLREYQELMNVKALDVEIATYKLLLEGEESRMSGEIANPVS  
VSVVSSNTTTGGGAISGGYGGGFGVGMGSGGGIGFGFGGGSSSISGFSRGGSGNSGVKIIISTSSSSYSQRLH

>Caecilian\_K5L3

MRRSQSYSTSGVSMGGKGFSSVSVGMGMSAGGMRSGGGGGGRVFSFSSASVSHVGRSGGGLGRVGSAMGCRSLGGTKSTCITTSVSRGGGGG  
GGGHASGIIIFGGGAAGSGFGGGAGGAGFGGGAGVGFGGGFGGGGFGGGGFGGAGFPGGAGGMMAGGPGFPVCPGGIQPVSINQSLTLP  
LHLEIDPQLQKVRKEEREQIKTLNKKFASFIDKVRFLQEQNKVLETKWSFLREHTTKTGTRDNIEPMEFAYISNLRRLQLEALKNDRGRLEGE  
KNMQDLVEDFKRKYEDENKRTAAENEFVVLKDDVDKAYMDKVDLEVRVDTLTDHINFLRALYDAELQEVHGQLSDTSVLSMDNRRALDLSGL  
IAEVKAQYEDIAARSKAEAEVGFETKFKQQLQQAAGQHGDLSLRNSKTEISDLNRQMQRMAEIESVKKQIAKLQAAIAEAERGERALKDARAKL  
AELEAALQKAKEEMARQLKEYQDLNMVKS LLDIEIATYR TLLEGEESRMAEITNEVSI SVVSSQTSVSSGGAGGFGAGGAGGFGAGGGGGSV  
GGGAGGFMAGGGGLGGVGGY GAGAHLSGGGGGFGAGSGGGFVSGSSFSSSSRGGGGGRSSGAHMVSSSSSTSSKKMY

>Caecilian\_K5L4

MRRSQSYSTSGVSMGGKGFSSVSVGMGMSAGGMRSGGGGGGRVFSFSSASVSHVGRSGGGLGRSLGCRSLGGTKSISISTGYARGGGGGGG  
GGGHASGIIIFGAGAGGAGFGGGAGGAGFGGGAGVGFGGGFGGGGFGGAGGFGGAGFPGGAGGMMAGGPGFPVCPGGIQPVSINQSLTLP  
HLEIDPELQKVRKEEREQIKTLNKKFASFIDKVRFLQEQNKVLETKWSFLREHTTKTGTRDNIEPMEFAYISTLRRRLETLKNERGRLEGLD  
NMQDLLEDFKRYEDENKRTAAENEFVVLKDDVDNAYMKVLEVRVDTLTDHINFLRALYDAELQEVHGQLSDTSVLSMDNRRALDLSGLI  
AEVKAQYEDIAARSKAEAEVGFETKFKQQLQQAAGQHGDLSLRNSKTEISDLNRQMQRMAEIESAKKQIAKLQGAIAEAERGERALNDARQKLA  
EAEALQKAKEEMARQLKEYQDLNMVKS LLDIEIATYR TLLEGEESRMAEITNEVSI SVVSSQTSVSSGGAGGFGAGGAGGFGAGGAGGFGAG  
GGGFGVGGGAGGYMAGGGGLGGVGGYGTGGGGFGAGSGGGFVSGSSFSSSSRGGGGGRSSGVAIVSTSSSSSSSKYIKPNV

>Caecilian\_K5L5

MSLRQSSQASMRKGFSSASSVGGVSGGRRGGFSSSSASQVGGGHRASAITNRSLYNLGGNKRTSIYPPSASSIQGGGSAGGGSMGFVGGAG  
GTGFGGFGSAAGGGGFGGAGAGFGGGAGVGFGGGFGGGGFGGAGGFGGAGFPGGAGGMMAGGPGFPVCPGGIQPVSINQSLTLP  
ETKWSLLQDQSHKTSIKRDNMTPLEAYISNLKRLDLMLDKRGLVGLKNNMQDLAEFFKRYEEMNKRTAAENEFVVLKDDVDNAYMKVLEVRVDTLTDHINFLRALYDAELQEVHGQLSDTSVLSMDNRRALDLSGLI  
LEAKVHSLTDKINFLR TLTYDAELTEVQQLSDTSVLSMDNRRALDLSGLIAEVKAQYEDIAARSKAEAEVGFETKFKQQLQQAAGQHGDLSLRNSKTEISDLNRQMQRMAEIESAKKQIAKLQGAIAEAERGERALNDARQKLA  
EAEALQKAKEEMARQLKEYQDLNMVKS LLDIEIATYR TLLEGEESRMAEITNEVSI SVVSSQTSVSSGGAGGFGAGGAGGFGAGGAGGFGAG  
KNDISDMNSRIKRLQSEIETVKKQIAKLQAEIAEVEQRGELALKDARTKLALEAALQKAKEDMAHRVKEYQALMNVKALDIEIATYR TLLEGE  
EECRMAEITINTVSI SVVSSNSAISGEQFGSGGGGGHSGFGTGQGGSSRIGVGGMQSGSVSVSSSSSKKHQML

>Caecilian\_K5L6

MMRQSQSSHQVQKQSFGRSVAGGSMRVQNVGGGARGFSACSGGGGGRSKIIMGSGNRAGGMSSASLFLGGTKRTSVCSNSSVRRGGGAVAG  
GGFGGGVGGVGGVGGVGGGIGVGGGAGFGGGAGGFGGGAGGFGGAGFPGGAGGMMAGGPGFPVCPGGIQPVSINQSLTLP  
RTEEREQIKTLNKKFASFIDKVRFLQEQNKVLETKWAFLEQNTQKTGTRDNIEPLFQTYISNMKRQLDKIIGERSRLDSDLKSNQVVLVEDYR  
KYEDENKRTAAENEFVVLKDDVDTAYMKVLEAKVYGLTDEINFLRQLHDTLQEVSGGLSDTSVLSMDNRRALDLSGLIIEVKAQYEEIA  
AISKAEEAVCDNKFRQLQATAGAGNTIKNSKNEISDLNRQMQRMAEIESVKKQIASLQTAIAEAERGERALNDARQKLA  
DMAHRLKEYQNLMSKLSL DVEIATYR TLLEGEESRMSGEISSTVSI SVVSSSSVSGGGSGGYGGASGGMGGASGGYGGASGGMGGASGGYGG  
ASGGYGGASGGFGGQSSSKGYSQGGSGSSSYSSMAVSSSSSSSKKQSY

>Caecilian\_K5L7

MMRQSQSSHQVQKQSFGRSVAGGSMRVQNVGGGARGFSACSGGGGGRSKIIMGSGNRAGGMSSASLFLGGTKRTSVCSNSSVRRGGGAVAG  
GGFGGGVGGVGGVGGVGGGIGVGGGAGFGGGAGGFGGGAGGFGGGAGGFGGAGFPGGAGGMMAGGPGFPVCPGGIQPVSINQSLTLP  
VEIDPNIQKVRTEEREQIKTLNKKFASFIDKVRFLQEQNKVLETKWAFLEQNTQKTGTRDNIEPLFQTYISNMKRQLDKIIGERSRLDSELKS  
MQVLVEDFKRYEDENKRTAAENEFVVLKDDVDAAYMNKVLQEARVGLTDEINFLRHLYESLELQEVSGGLSDTSVLSMDNRRALDLSGLIA  
EVKAQYEEIAAISKAEEAVCDNKFRQLQATAGAGNTIKNSKNEISDLNRQMQRMAEIESVKKQIASLQTAIAEAERGERALNDARQKLA  
LEAALQKAKEDMAHRLKEYQNLMSKLSL DVEIATYR TLLEGEESRMSGEISSTVSI SVVSSSSVSGGGSGGYGGASGGMGGASGGYGGASGGMGGASGGYGGASG  
MGGASGGYGGASGGMGGASGGYGGASGGYGGASGGFGGQSSSKGYSQGGSGSSSYSSMAVSSSSSSSKKQSY

```
>Caecilian_K5L8
MMRQSQSHSQVQKQSFSGSRVAGGSMRVQNVGGGARGFSAACSAGGGGRSKISMGSGNRAGGMSSASLCFLGGTKRRTSVCSNSNVRGGGVVAG
GGFGGGFGGGVGGVGGVGGVGGGAGFGGGAGFGGGAGAGGFVGGAGPGFGGPVPGGPFVPCPPGGIKQVTINQSLTPLNVEIDPNIQKVRT
EEREQIKTLNKKFASFDKVRFLQQNQVLETKWAFLEQENTQKTGTRKRDNIEPLFQAYISNQKRQLDKIIGERSRLDSELKSMQVLVEDFKKKY
EDEINKRTAAENEFVVLKDKDVAAYMNKVQLEARVDGLTDEINFLRHLYESELQEVSGGLSDTSVILSMDNRRDLDSLGI IAEVKAQYEEIAAI
SKAEAEAVCDNKFRQLQATAGQAGNTIKNSKNEISDLNRQMQRMKSEIESVKKQIASLQTAIAEAEKRGEAALNDAKKKLADLEAALQKAKEDM
AHLRKEYQNLMSKLSLDVEIATYRKLLEGEESRMSGEISSTVSI SVVSGSSSVSGGSGGYGGASGGMGASGGYGGASGGMGASGGYGGAS
GGYGGASGGYGGASGGFGGQGSSSKGYSQGGSGSSSYSSSSMAVSSSSSSKQSY
```

```
>Caecilian_K5L9
MSFQIGKSKCGNANRVSFSSSSVSRASYGGSGRGSYSSRSLINLGRSKQISLGGGGSSRFSARSYGFGGGAGGVFAGGISGGLGGGIGGG
YGGSPGFVPCPPGGIQEVTINQSLAPLNLEIDPAIQIRIQEEREQIKTLNKKFASFDKVRFLQQNKVLETKWALLQEQQSPRGGTNRNLDLP
IFVAYINKLKRQLDNITNDRSRLNSELKNMQDVVEEFKKKYEDEINKRTATENEFVVLKDKDVAAYMKKVDLQSKVDSLVEINFLRALYEAEL
SQMQTQVSDTSVILSMDNRRDLNLDLSIAEVKAQYEEIANRSRAEASWYQSKYEELQVTAGRHGDDLRSTKTQISELTRMMQRLKSEIEILKK
QIASLQAAVSEAEERGELALKDARKKLSDLLETALQKAKEDMARQLREYQELLNKLDLVEIATYKLLLEGEECRMSGEHGSAVSISVSSSSG
SRGGIGGSIGSGIGSGIGGSISGGIGGGSYGSYGGGFSSGSRGGTSIVKKTYYSSQSSSKRY
```

**Suppl. Fig. S2. Amino acid sequences of type I and II keratins of platypus, birds, and amphibians.** The amino acid sequences of type I (A) and type II (B) keratins used for comparative analysis of cysteine contents are shown in FASTA format. The sequences are sorted according to species and, within each species, according to the order of the corresponding genes in the type I or type II keratin gene clusters, unless this order is currently unknown (axolotl and caecilian). Accession numbers and data about the genes are provided in Supplementary Tables S7-S13. Preliminary names and accession numbers of zebrafish (*Danio rerio*) keratins are provided in Supplementary Table S14. Keratin amino acid sequences of species shown in Figures 1 and 2 are not included here but in Suppl. Fig. S1. Species: platypus (*Ornithorhynchus anatinus*), kiwi (*Apteryx australis*), ostrich (*Struthio camelus australis*), zebra finch (*Taeniopygia guttata*), Nanorana/Tibetan frog (*Nanorana parkeri*), axolotl (*Ambystoma mexicanum*), caecilian (*Microcaecilia unicolor*).

**A**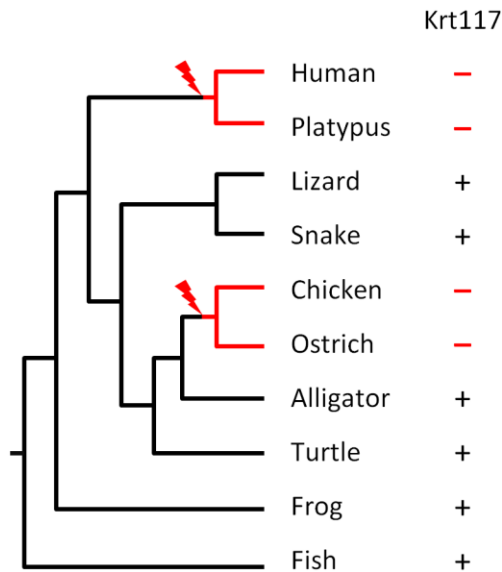**B**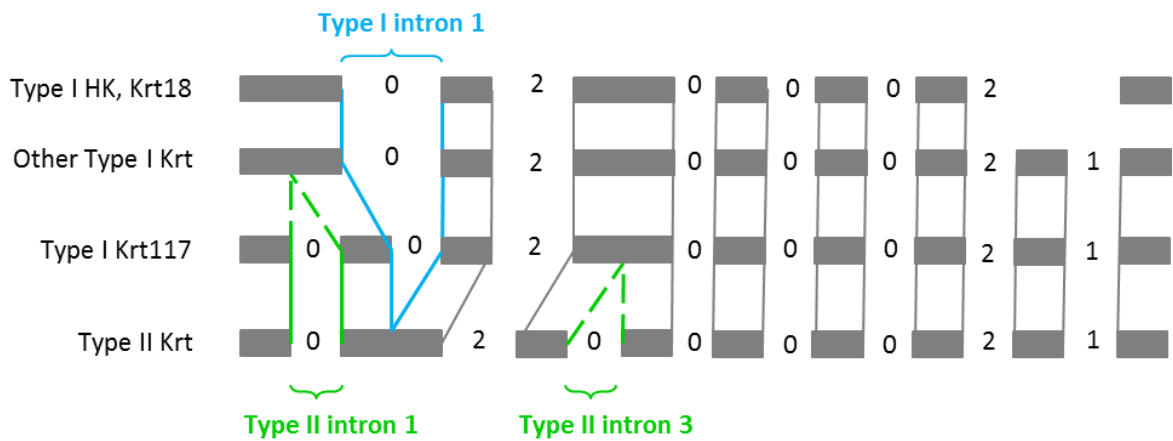**C**

```

1                               80
Fish_K117  M--SVPFTQQGFSSSSLGGWMLDSPCIVPQRYSHSMYGGAGCFRTRISQGLYFNS-----SCSAGGDWDP
Frog_K117  MSFSSTRSISQSARFGVFASPGVNRARSVA-----GGASTVMSSANMTSSAFA-----ASPFEVGV
Allig_K117 MA-SSLS-RNLFVCFVGPQGPLRNWISAAGLQ---PGLLSIHGGAGSIGSYLSSASDAFVKCVPGGSYEPGIGSGASGIGL
Turtle_K117 MA-S-FS-RS----GVTLGPRLSWVRVVGQQGGVPGGLGVCGGAGSTSSRLFSGSDGIVG-----PGLGGGARPEGL
Lizard_K117 MS-TTFSSRSLSFSGSVRGP RSGSTLSIARPQTASNIYGV MNSLPPSAKDTMA-----RRYPETDI
Snake_K117 MP-TTFSSHMS-SGSIQGPGRGRRLLALGRPQAVPSIHRVIRDKTRL SYGD-----GQGFMDTNI
<----- encoded by exon 1 ----->

81                               160
Fish_K117  ASNGGKFTMQNLNDRDLACYLEKVRSLNKNRELQLNIDEFRVKTTYI-TKDYANYFSLISDLKKKITRSCSENQNLQLQI
Frog_K117  TSNNGKETMQNLNDRLSNYLERVRSLELANHELEKIREYLDKKAAVGSM DVSGYYKTINLRSQINDATIDNTRLVLSI
Allig_K117 LGMNEKDTMQNLNDRDLAAYLERVCSLEEANGQLEQRIQELQVKKTLARHYDPS SCFSTIAELRSQIQDESVRNSQLTLQL
Turtle_K117 LSMNEKDTMQNLNDRDLAAYLETVRSLEEANGQLERQIREVYAKRAQAGCQDLSGYFSTIAELRSQIQAASTNAQLLILQI
Lizard_K117 LDINQKGTMQNLNDRDLAAYLGRVHSLAESNAQLEQNI REYYAKRASAGGPDLSGYFNTLSELKAKIEQETLNNAGLLRI
Snake_K117 LDMNEKGTMQNLNDRDLAAYLDKVL SLEKSNMQLEQNIQEFYTKQTSTGTHDMSAYFNAMIQKSEIQKETLKNAGLLQLI
<----- encoded by exon 1 -----> <----- encoded by exon 2 -----> <- enc. exon 3

161                               240
Fish_K117  ESSRLAAEDFKMKSEMEINMRTTVEADLLDVRFRDGLTTLTMSLELTLLEGLNEERIIPMDREHDEEMEERRRRGAGEVKV
Frog_K117  DNAKLAADDFKIKYESELAIRTGAESDIAGLRRVLDLTLNKTDLLELDIESLKEELIYLKKSHEEELAVVRS SAKGNVDV
Allig_K117 DNAKLAADDFRMKYEAELATRLGVESDIKGLRKVLDGLTEARASLQVQIESLKEELTYLQQNHGEEVVALQGH LGGSVSV
Turtle_K117 DNATLAADDFRVKFESELAIRRGESDVAGLRKVLDEVTL SRASLQEEELGSLQEE LAQLQKNHGEEAALQGR LGGSVSV
Lizard_K117 DNAKLAADDFKVKLESEVAIRLSLEGDVNLGRKVLDDVNASRASLQVQVDNLQEEELVYLKRNHEE EVASLQGR LGGTVNV
Snake_K117 DNARLAADDFRVKLESEVAMRLSLEGLDGLGRKALBELN ASRASLQVQADNLQEEELACLKRNHKEEVASLQGH LGGTVNV
<----- encoded by exon 3 -----> <----- encoded by exon 4 -----> <- enc. exon 5

```

```

241                                                    320
Fish_K117  EVDDSGSCDLEKVLAEMRQYEIMIKNNKKEIEKWYQKNIKALEEKIRIFTTEVETHRSEISVLKRSYQSLEITRQSLCT
Frog_K117  QVDSAPPVDLAQIMTDVRAQYESSMMEKNRQEVEAWYRGQSENLNKEVAINTALQTSKSEITDLKRTIQSLEIELQSLLS
Allig_K117  EVDASPGINLVKTLAEIRDQYEDIIEKNQREAEAWHKQQCEFTTQEVATSSSEALQAARTKATELKRIVQSLEIEFQMLQS
Turtle_K117  EVDSAPGVDLVKTLAEIRDQYEDVIERNHREAAAWHKEQCETVAQEVATSAEAVQGARTKLTELRRVVGLEVEQLSLS
Lizard_K117  EVDSMPGVDLQKVLAEIRDQYEDVMEKNRQEAEALHKAQCDAINQVADSSEALQAAQLKITELRRLAQALEIELQSLRS
Snake_K117  EVDSMPGTDLQKVLGEVRDQYEGVMEKNRQEAEALHQSQCDALNQEVSSTEALQSAQMKMVELKRLAQALEIELQSLWS
----- encoded by exon 5 -----><----- encoded by exon 6 -----

321                                                    400
Fish_K117  EIECWQONICAVNKQTSAQLSCHQSVITALETKLQQMKACITEHRIKHDTVLELKTRLEGEIAEYRRLLEGEGCEHKAL-
Frog_K117  MKNALEGTLAETEARYGSELNHLQAMITQVELEMQNLRSDAERQSFEYKLLLDIKTRLEMEIATYRRLLEGE--DNRFSQ
Allig_K117  TKEALEGTLAETESHYGVMAQLQNLVAGKEAELAQLRTDTQRQANEYQHLLDLKTRLEVEIATYQHLLEQ--EVRSEA
Turtle_K117  MKEALEGTLAETRAGSGAELEQLRECVARKEAELAQLRTDTQRQAEEHQLLDLKTRLEMEIATYRRLLEGD--DVRSDA
Lizard_K117  TKIALEGTLVETESRYGMELSRLRELISARESELFQLRSEAQRQAEDYKRLMDIKNKLEQEIATYRRLLEGE-----LDT
Snake_K117  MKEALEGTLAEVESHYGLELSQLQNLVAREAELLQLKSDAQNQAEDYKRLMDIKNRLEQEIATYRCLEGE-----SES
><----- encoded by exon 7 -----><-----

401                                                    452
Fish_K117  VIKQVTEEVAEQKPHIE-----KRVKIIVEELVDGQVVSSVDIQVHDVE
Frog_K117  TETQK----DVTIISKEQTKSSIKKVKTVIEEVVDGKVVSSRVEEMTEKL-
Allig_K117  KSP-KQEILPEA--VSKAPT--RRIKTLIEELVDGEVVSSCIEEVEHPL-
Turtle_K117  KSPVRQ-TPPEA--VNSSPTS--RRVKTVIEELLDGRVVSSRTEEVEHPL-
Lizard_K117  EPP----SPPEHT-----TS--RRVKTVIEELVDGQVVSSRVEVEQPL-
Snake_K117  EPL----TTPPEPS-----VS--RRVKTVIEELVDGKVVSSRMEEVEHQL-
exon 8 --><----- encoded by exon 9 ----->

```

**Suppl. Fig. S3. *Krt117*, a keratin gene with a unique exon-intron structure, has been lost in mammals and birds.** (A) The presence (+) or absence (-) of *Krt117* was mapped onto a simplified phylogenetic tree of vertebrates. Gene loss events (flash symbols) were inferred from the distribution of *Krt117* in extant species. (B) Exon-intron structure of *Krt117* and other keratin genes. Exons are depicted as grey boxes. The numbers between the exons indicate the phase of splicing of the intron. Homologous splice sites are connected by vertical lines. Intron 1 of type I keratin genes is not conserved in type II keratin genes, whereas introns 1 and 3 of type II keratin genes are not conserved in type I keratin genes. *Krt117* has the same introns as other type I keratins but, in addition, it has an intron at a position homologous to intron 1 of type II keratins. Note that the lengths of exon symbols are not proportional to the lengths of the exons. (C) Amino acid sequence alignment of K117 proteins. The segments encoded by the different exons of the *Krt117* gene are indicated below the sequences. Residues identical in all species are shown with red fonts, and weakly conserved residues are shown with blue fonts. The alignment was made with the Multalin program. Species: alligator (*Alligator sinensis*, abbreviation: Allig), fish (guppy, *Poecilia reticulata*), frog (*Xenopus tropicalis*), lizard (*Anolis carolinensis*), snake (*Protobothrops mucrosquamatus*), turtle (*Chrysemys picta bellii*).

>Ami\_K78LT

MSLLSPSCCKSGDGGKDFSSCSAHC GSVGVGSSSSSI CQLGESRGGKGYFGYGYGSKSLHNLGGTRRISV CNGYQG  
GGRGYGV CWERYGGWGYGRGGFGGGNFGGGARFGGI CRGGLIGGGLGGGDIGRSWGIQGVHVNGNLLRPVHVEI  
DPDFQVRVRAHEREQIKSLNDKFA CFIDKVR CLEQENQVLLTKWELLQQGGQTGVHRDIEPFQSYI CHLRQORD  
TLQSQKEELNLED CKMLQIVNEYKASYEKEIDRRL CTEEFVNLKKNLD CIYMGKMEVGKVNMLREEIEFLK CL  
YATERSDVQRIAQDTNVVVSMDN CRDL DVEGIIAEIRREYEGLAQKSQAEVNAVYQSKYQDLHNTWGRH CDRLRT  
RQHEIQELTRLIQKRLRDI GEVKKKNA CLOEEIANAERHG CCAVSDAQEKLGE LRC SLLKAKDNLAHLRLDYQEL  
LNVKMALDIEIATYRALLEGE ECRITEGLPGPIPVINHGTWVSGSAGGRYGGFPWC WGGYGGFRGGH CGWGGGIN  
WGIEGGH CSIRRGFSSRSGGHYSRNIR CSPPNYGGSKGGGFSSRSEGGNVKVC I SRGGEP SFGGSC SGGVGGIFG  
MGGSC ESAGGGHGSVGGSQGGGGFISGGE CSFGDGRYGYGKSD CCVVGGYGSVGGHSGVAVSSEWGGSSGSE  
GYSSGGTRFGSRRGGRSSGRN CCVFGGYGSRRTGTSGIQISSGWTGGSAGGGE CTARDGVSGSGGSWRSRGRD CC  
VIGGDGPGAGVSDGYSSGAGGYSSGVYGC CGGREYSGGAI ISGEGSSGASAS CSTGPYPAGWDHAGSGG CVS  
VGGYDSGVTAIPIVGGSSSGVGS CGSGAGNLSGERYSFGGRGYG CGVSSISGGECS CGGDASIGVHSESV  
GYISGARGHSSVNIGSDE CSTG CGSGGGAYSAGAGASSGMER CSSGVGGSSGGVVDI CGSGVHSSRVVGSSSGAG  
G CSSGGC SGGSGGHTSGSTNTPGAVGH CSSGSGGS CFFSGGYSGGGGGSGERGYSSSRIGG CASSTYSPRAG  
GSFGGGLRSGGIGRTGGSSGGIGPGGYGFGAGSSSGGYS CGSGGYG SIRGSYSGSGGYSGGTGGYSGAGGS  
PGGRGYS CGSGGYSSGAGGSTSGGV CSSGGRYGS SGEYDSGAGGLSSGDV CSTSGGYSGGGSGGYSGSGG  
YDSGAGRLSSGDV CRISGGYDSGVGGSGYGS SGA YDSGAGRLSSGDV CRISGGYSGGGDSGEYGS SGA D  
DSGAGRLISGDV CRISGRYNSGAERSE EYSSGNEAYDSEAGRLS CGDVC SVSGRSPGADGF CSGDAC CSISGGY  
GSGGGSGGYSGSGAHDSETGRLSSGDV CSIGAGGYSGGGSGGYSGSGAHDSETGRLSSGDV CSIGAGGYG  
SGVGGSGGYGSRSDGYSSGAGGSSVRV CSISGGYSSGAGGSSRGRERSISGGYDSGI CGGGYSGGGYGS  
VGGYSSGEVGGSTTGGISGGGEYSGTGGS CEVSGSVGGSLGTTGYSSGVGESSGGIGP CGSGHGVS VGRGY  
SGSIGAGDYSGHGDSC EVAGSGSGLGGSSGAGASGGGGYSPGGTSSGDVGGSSGEGVGC SGGFGS IGRNYS  
SGGYSSGPGGYSGAGGST CEGEDYGFGRGSPGGGGGSGEAGS CSSGRYSGVGGRS SGGY CSSEGGSSGGR  
YSGVGGSSRIGSSGGGGRYSSGGEYTSRGSWISGGRAS CGSGRYGPGAWGYSGAGGSSSRVYGS CGGGYS  
SGGRWSSGWAGSTGGEYSSGAGRHGSSSGRYSSFSGHAGS CLGDYGSRSWGHYEGRGS SGGSSGWGGC GP  
GGTSSGVGGHSLGETGSPGGIGS CGSGGGSSGGGLGPGSGGFD SGAGGSSSGVCS ISGGGYSGGVGTGSEG  
V CSIDGGYGS SGGHSGIGSSSGGV CSISGGYGS SGGYSGEGGSGFGSGGYSGVGGSSSGVCTIDGG  
GYSGSGHGSGIGSSSGGVCTIGGGEYSGSGGYSSGGGSGSAGGYSGAGGSSSGVCTIGGGEYSGSG  
GYSSGGGSGSAGGYS CGAGGSGSGTGGEYSGSGRYSC GGISGGTGSGRYGYGGGSYSGRLSSRGSSTR

>Asi\_K78LT

MSQLSPSCCKSGDGGKDFSSCSAHC GSVGVGSSSSSI CQSGESRGGRYFGYGYGSKSLHNLGGTRRISV CDGYQG  
GGRGYGV CWERYGGWGYGRGGFGGGNFGGGARFGGI CRGGLVGGGLGGGDIGRSWGIQGVHVNGNLLRPVHMEI  
DPDFQVRVRAHEKEQIKSLNDKFA CFIDKVR CLEQENQVLLTKWELLQQGGQTGVHRDIEPFQSYI CHLRRQORD  
TLQSQKEELNLED CKMLQIVNEYKASYEKEIDRRL CTEEFVNLKKNLD CIYMGKMEVGKVNILREEIEFLK CL  
YAMELSDVQRIAQDTNVVVSMDN CRDL DVEGIIAEIRREYEGLAQKSQAEVNAVYQSKYQDLHNTWGRH CDRLRT  
RQHEIQELTRLIQKRLRDI GDVKKNA CLOEEIADVERRG CCAVSDAQEKLRELRC SLLKAKDNLAHLRLDYQEL  
LNVKMALDIEIATYRALLEGE ECRITEGLPGPIPVINHGTWVSGSAGGRYGGFPWC WGGYGGFRGGH CGWGGGRN  
WGI VGGH CSIRRGFSSRSGGHYSRNIR CSPPNYGGSKGGGFSSRSEGGNVKVC I SRGGEP SFGGSC SGGVGGIFG  
MGGSC ESAGGGHGSVGGSQAGGGGFISGGE CSFGDGRYGYGKSD CCVVGGYGSVGGHSGVAVSSKWDGSSGCE  
GYSSGGTRFGSRRGGRSSGRN CCVFGGYGSRRTGTSGIQISSGWTGGRAEGGE CTARDGVSGSGGSWRSRGRD CC  
VIGGDGPGAGVSDGYSSGAGGYSSGVYGC CGGREYSGGAI ISGEGSSGASVSC STGPYPAGWDHAGGGG CVS  
GGGGYDSGVTVIPIVGGSSSGVGS CGCGGYSGAGGSLSGERYSFGGRGYG CGVSSISGGECS CGGDASIGGG  
HSGSVGYISGARGHSSVNIGSDE CSTG CGSGGGAYSAGAGASSGMER CSSGVGGSSGGVVDI CGSGVHSSRVVGS  
SSGAGGSSSGGC SGGSGGHTSGSTNTPGAIGH CSSGSSSGGGSRFGSGGYSGGGGGSGERGYSSSRIGG CAS  
STYSPGAGGSSGGGLRSGGIGRTGGSSGGIGPGGYGSGAGGFSGGGYS CGSGGYG SIRGSYSGSGGYSGGTGG  
YSGAGGSPGGRGYS CGSGGYSSGAGGSTSGGV CSSGGGYVSGSGEYDSGAGGLSSGDV CSTSGGYSGGGGS  
GGYDSGAGRLS CGDVVDTSGGYSGGGSGGGYDSGAGRLSSGDV CSISVGGYDSGVGGSGGYSGSGAYDSGAGR  
LSSGDV CRISGGYSGGGDSGEYGS SGA DSGAGRLISGDV CRISGRYNSGAERSE EYSSGNGAYDSEAGRL  
SCGDVCS ISGRSPGADGF CSGDAC CSISGGYSGGGSGGYSGSGEHDSETGRLSSGDV CSIGAGGYSGGGGS  
GGYGSRSGGYSSGAVGSSVRVCS ISGGYSSGAGGSSRGRERSISGGDDSGI CGGGYSGGAQGWX GYSSGE  
VGGSTTGGIPGGRGYSGTGGS CEVSGSVGGSLGTTGYSSGVGESSGGIGP CGSSHGVS VGRGYSGSIGAGD  
YSGHGGSC EVAGSGSGLGNSGAGASGGGGYSTGTTGSSGDVGGSSGEGVGC SGGFGS IGRDYSGSGYSSGP  
GGYSGAGVST CEGEDYGFVGRGSPGGGGGSGEAGS CSSGRYSGVGGRS SGGY CSSEGGSSGGRYSGVGG  
SRIGSSGGGGRYSSGGEYTSRGSWISLGRAS CGSGRYGPGAWGYSGAGGSSQVYGS CGGGYSSGGRSSSG  
EMGT CSSGRYDSGAGGYSPGGRGSSGWAGSTGGEYSSGAEGSSGAGRHGNSGRYSSFSGHAGS CLDGC GSW  
SWGHYEGRGS SGGSSGWGGC GPGGADSSGVGGHSLGETGSPDMGS CGSGGGSSGGGLGPGSGGFD SGAGGS  
SSGGVCS ISGGGYSGGVGTGSEGVCS IDGGYGS SGGHSGIGSSSGGVCS ISGGEYSGSGRYSGAGGSS  
SGGVCS ISGGEYSGSGGYSSGGRGSGSAGGYSGVGGSSSGVCTIGGGYSSSGGFGSGRGGSGSAGGYS  
CGAGGSGSGIGGEGSGSGRYSC GGVSGGTGSGRYGYGGGSYSGRLSSRGSSTR





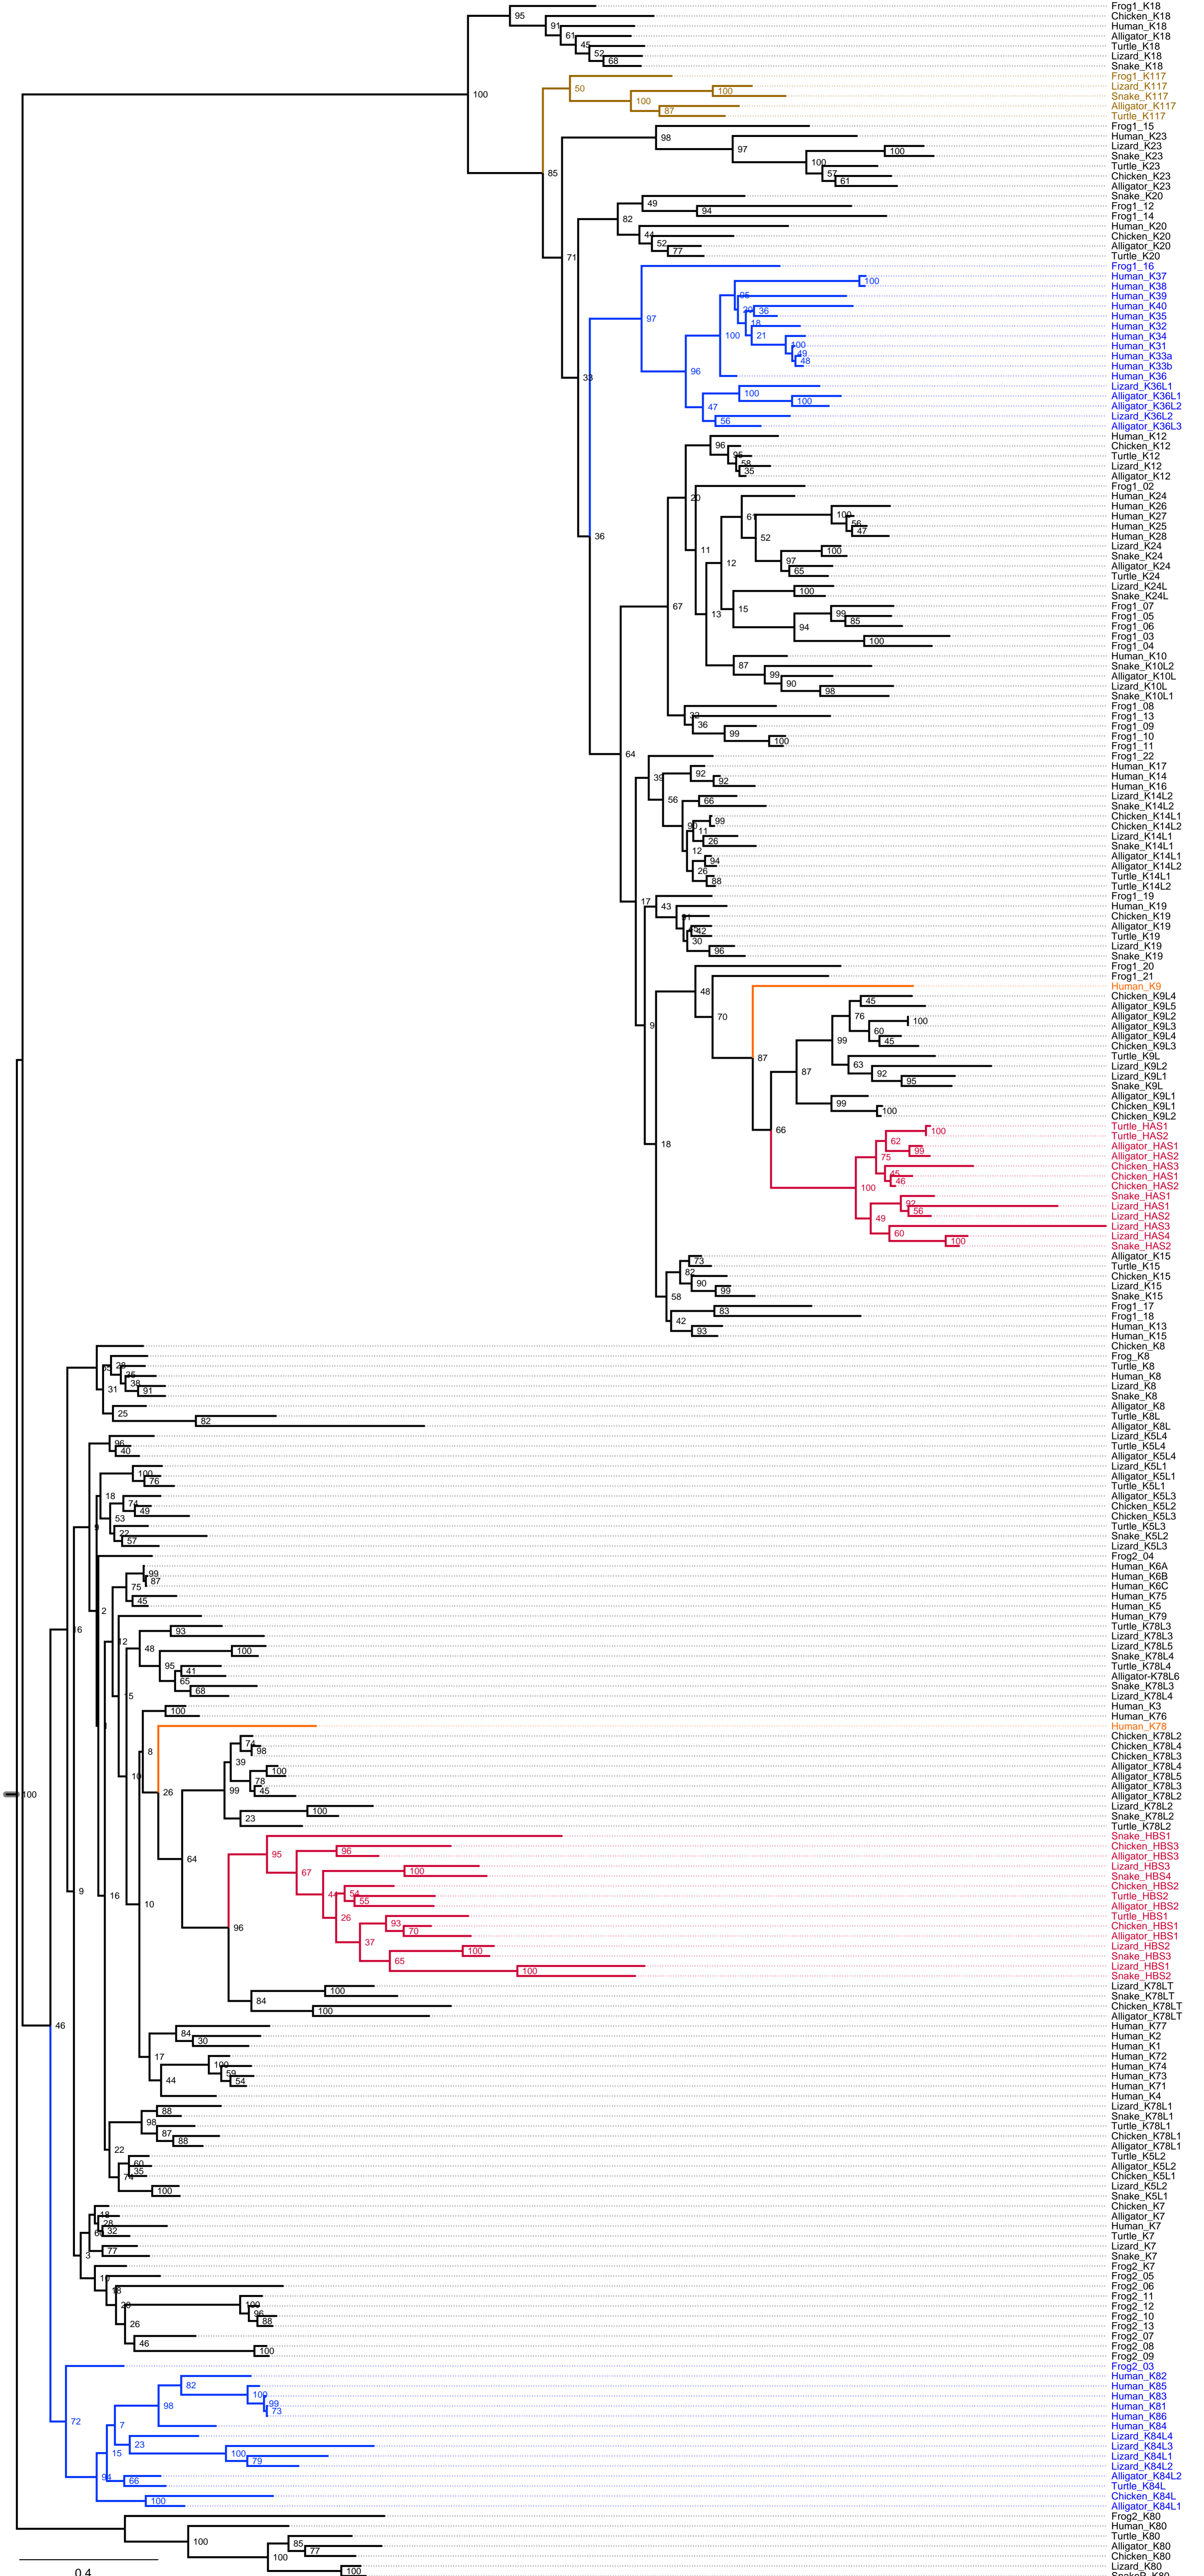

Suppl. Fig. S5. Maximum likelihood phylogenetic analysis of type I and type II keratins of tetrapods. The phylogenetic tree was generated with PhyML. Hair keratins and orthologs are indicated with blue fonts and lines. Saurospid-specific cysteine-rich keratins (HAS, HBS) are shown with red fonts and lines. Bootstrap values are indicated. Bayesian phylogenetic inference yielded similar results. Amino acid sequences: Suppl. Fig. S1. Accession numbers: Suppl. Tables S1-S2.

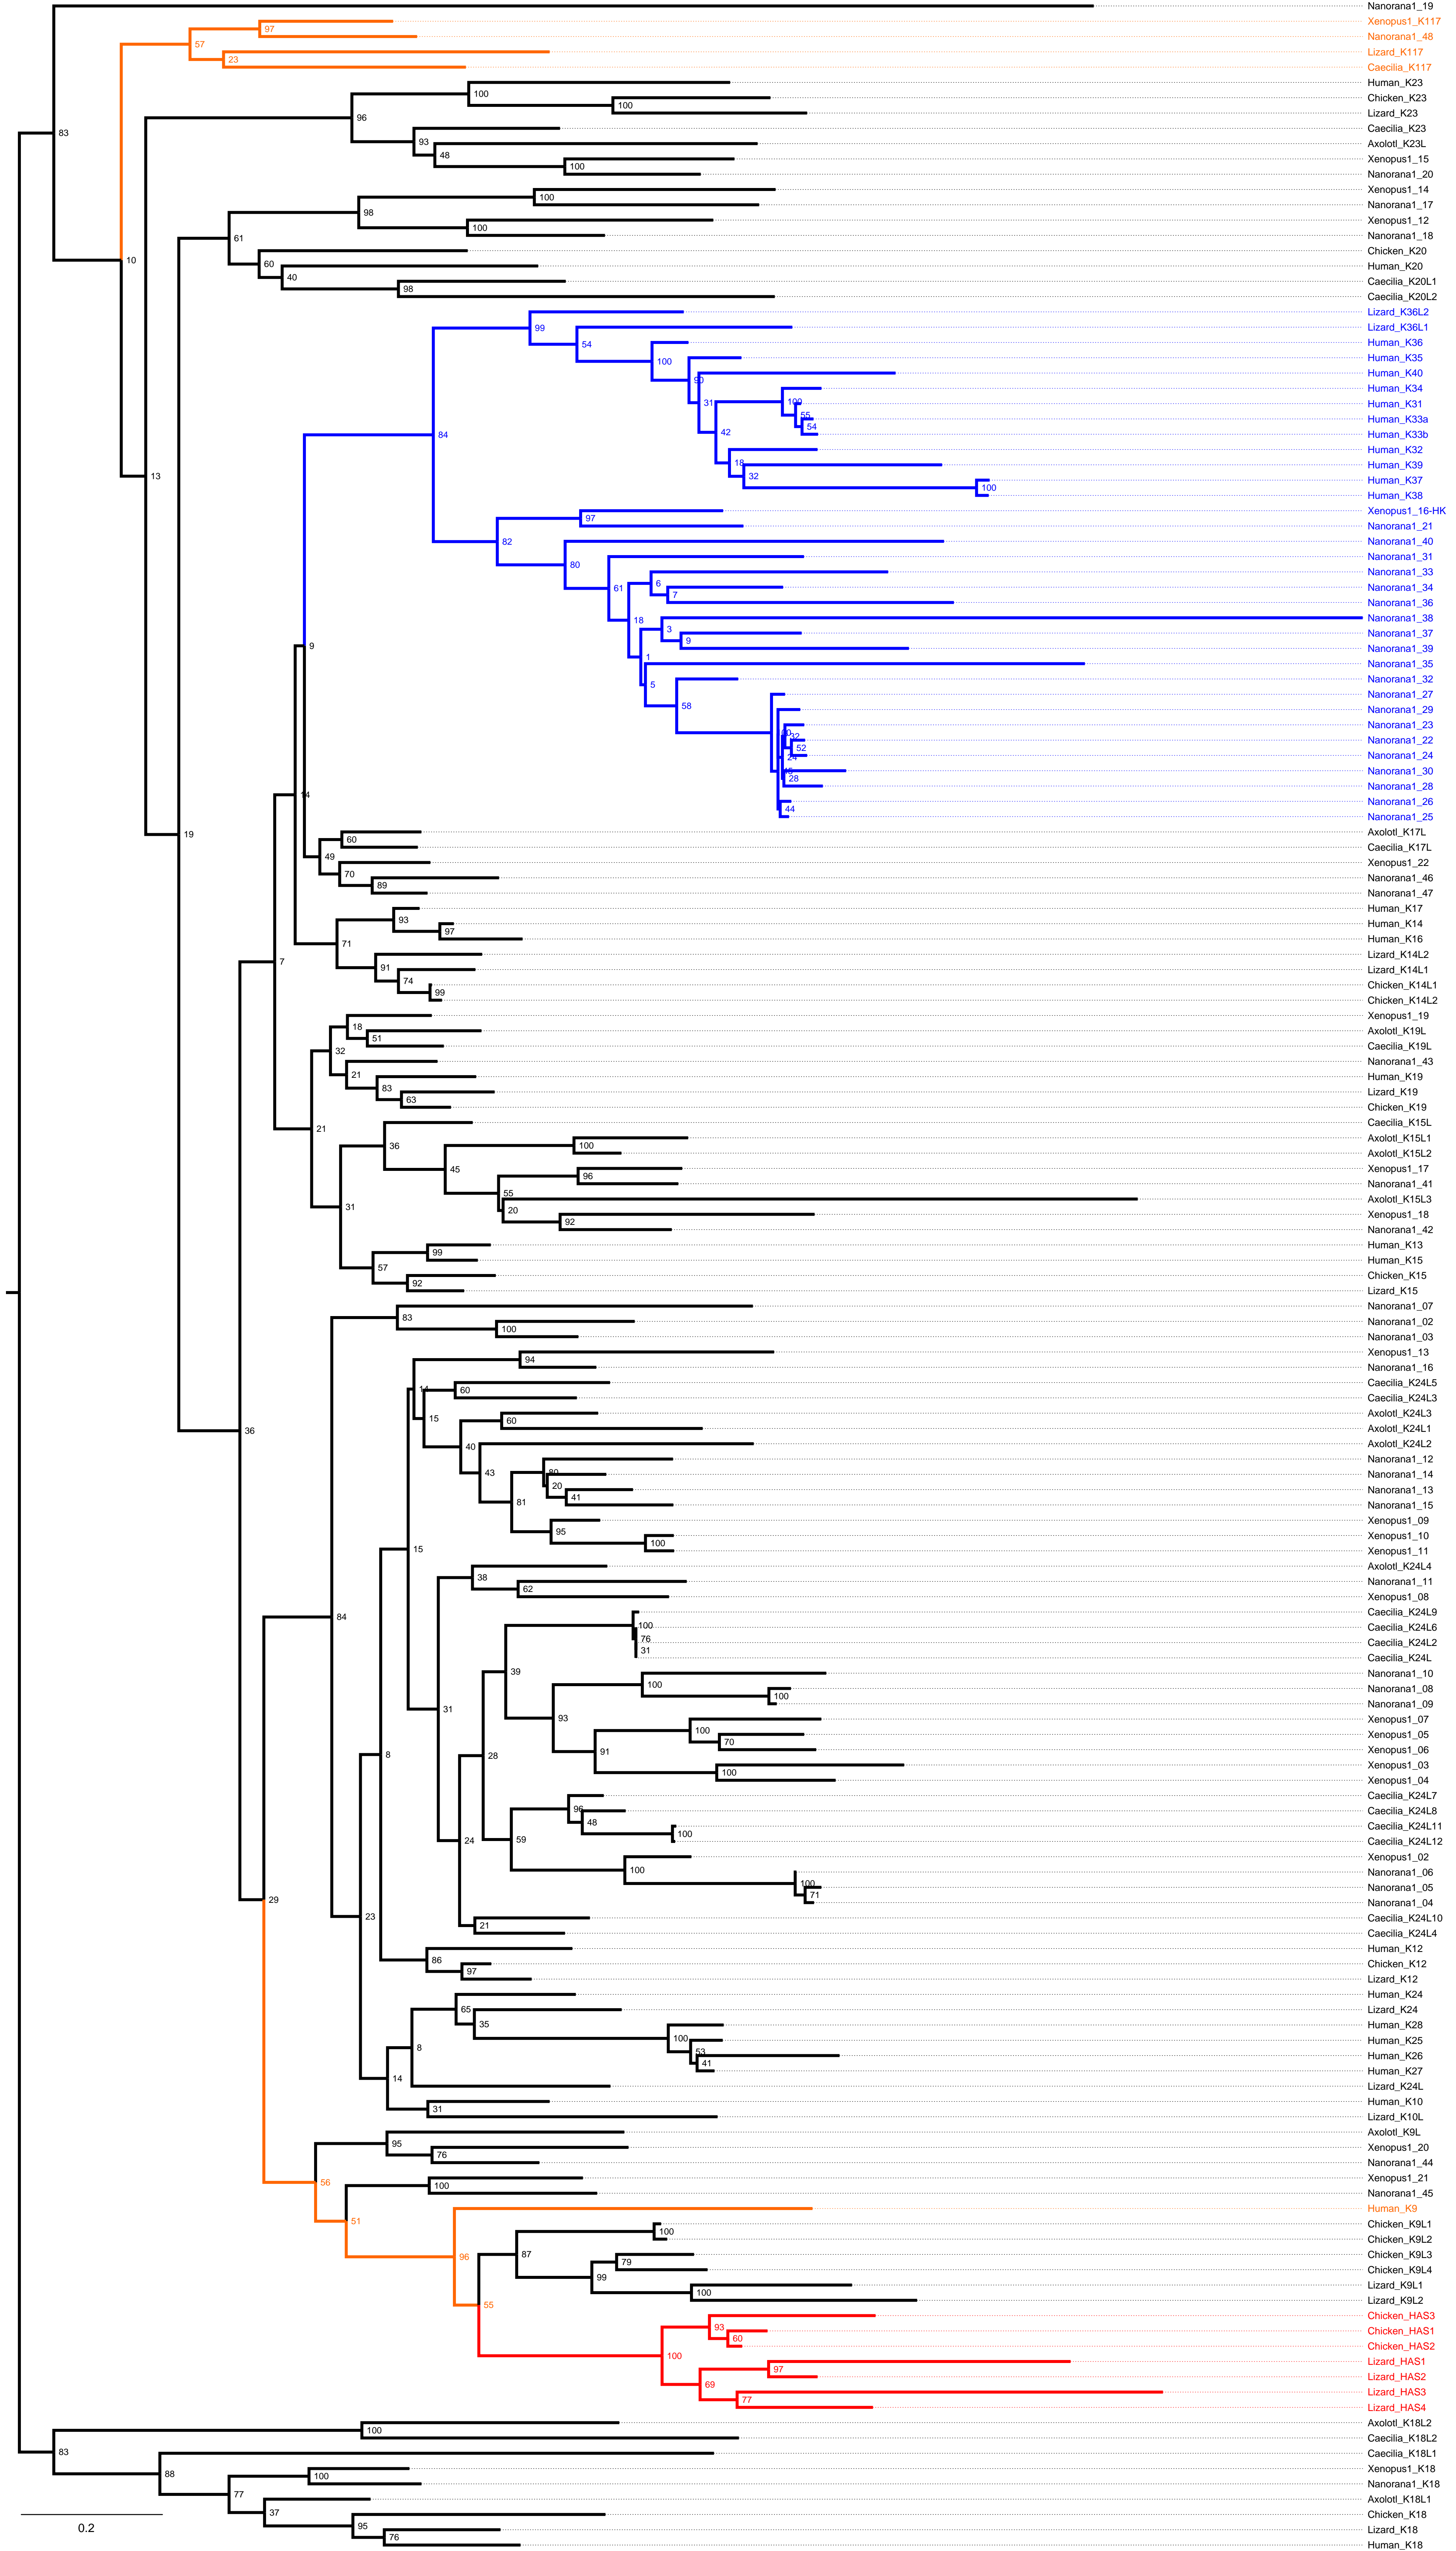

Suppl. Fig. S6. Maximum likelihood phylogenetic analysis of type I keratins of amphibians (*X. tropicalis*, Tibetan frog, axolotl, caecilian), chicken, lizard, and human. The phylogenetic tree was generated with PhyML. Sauropsid-specific cysteine-rich keratins (HAS) are shown with red fonts and lines. Hair keratins and orthologs are indicated with blue fonts and lines. Note that hair keratin orthologs of Xenopus and Nanorana have a low cysteine content. Bootstrap values are indicated. The scale bar represents substitutions/site. Bayesian phylogenetic inference yielded similar results. Amino acid sequences are provided in Suppl. Fig. S1 and S2. Accession numbers and information about the genes is shown in the Suppl. Tables S1-S13.

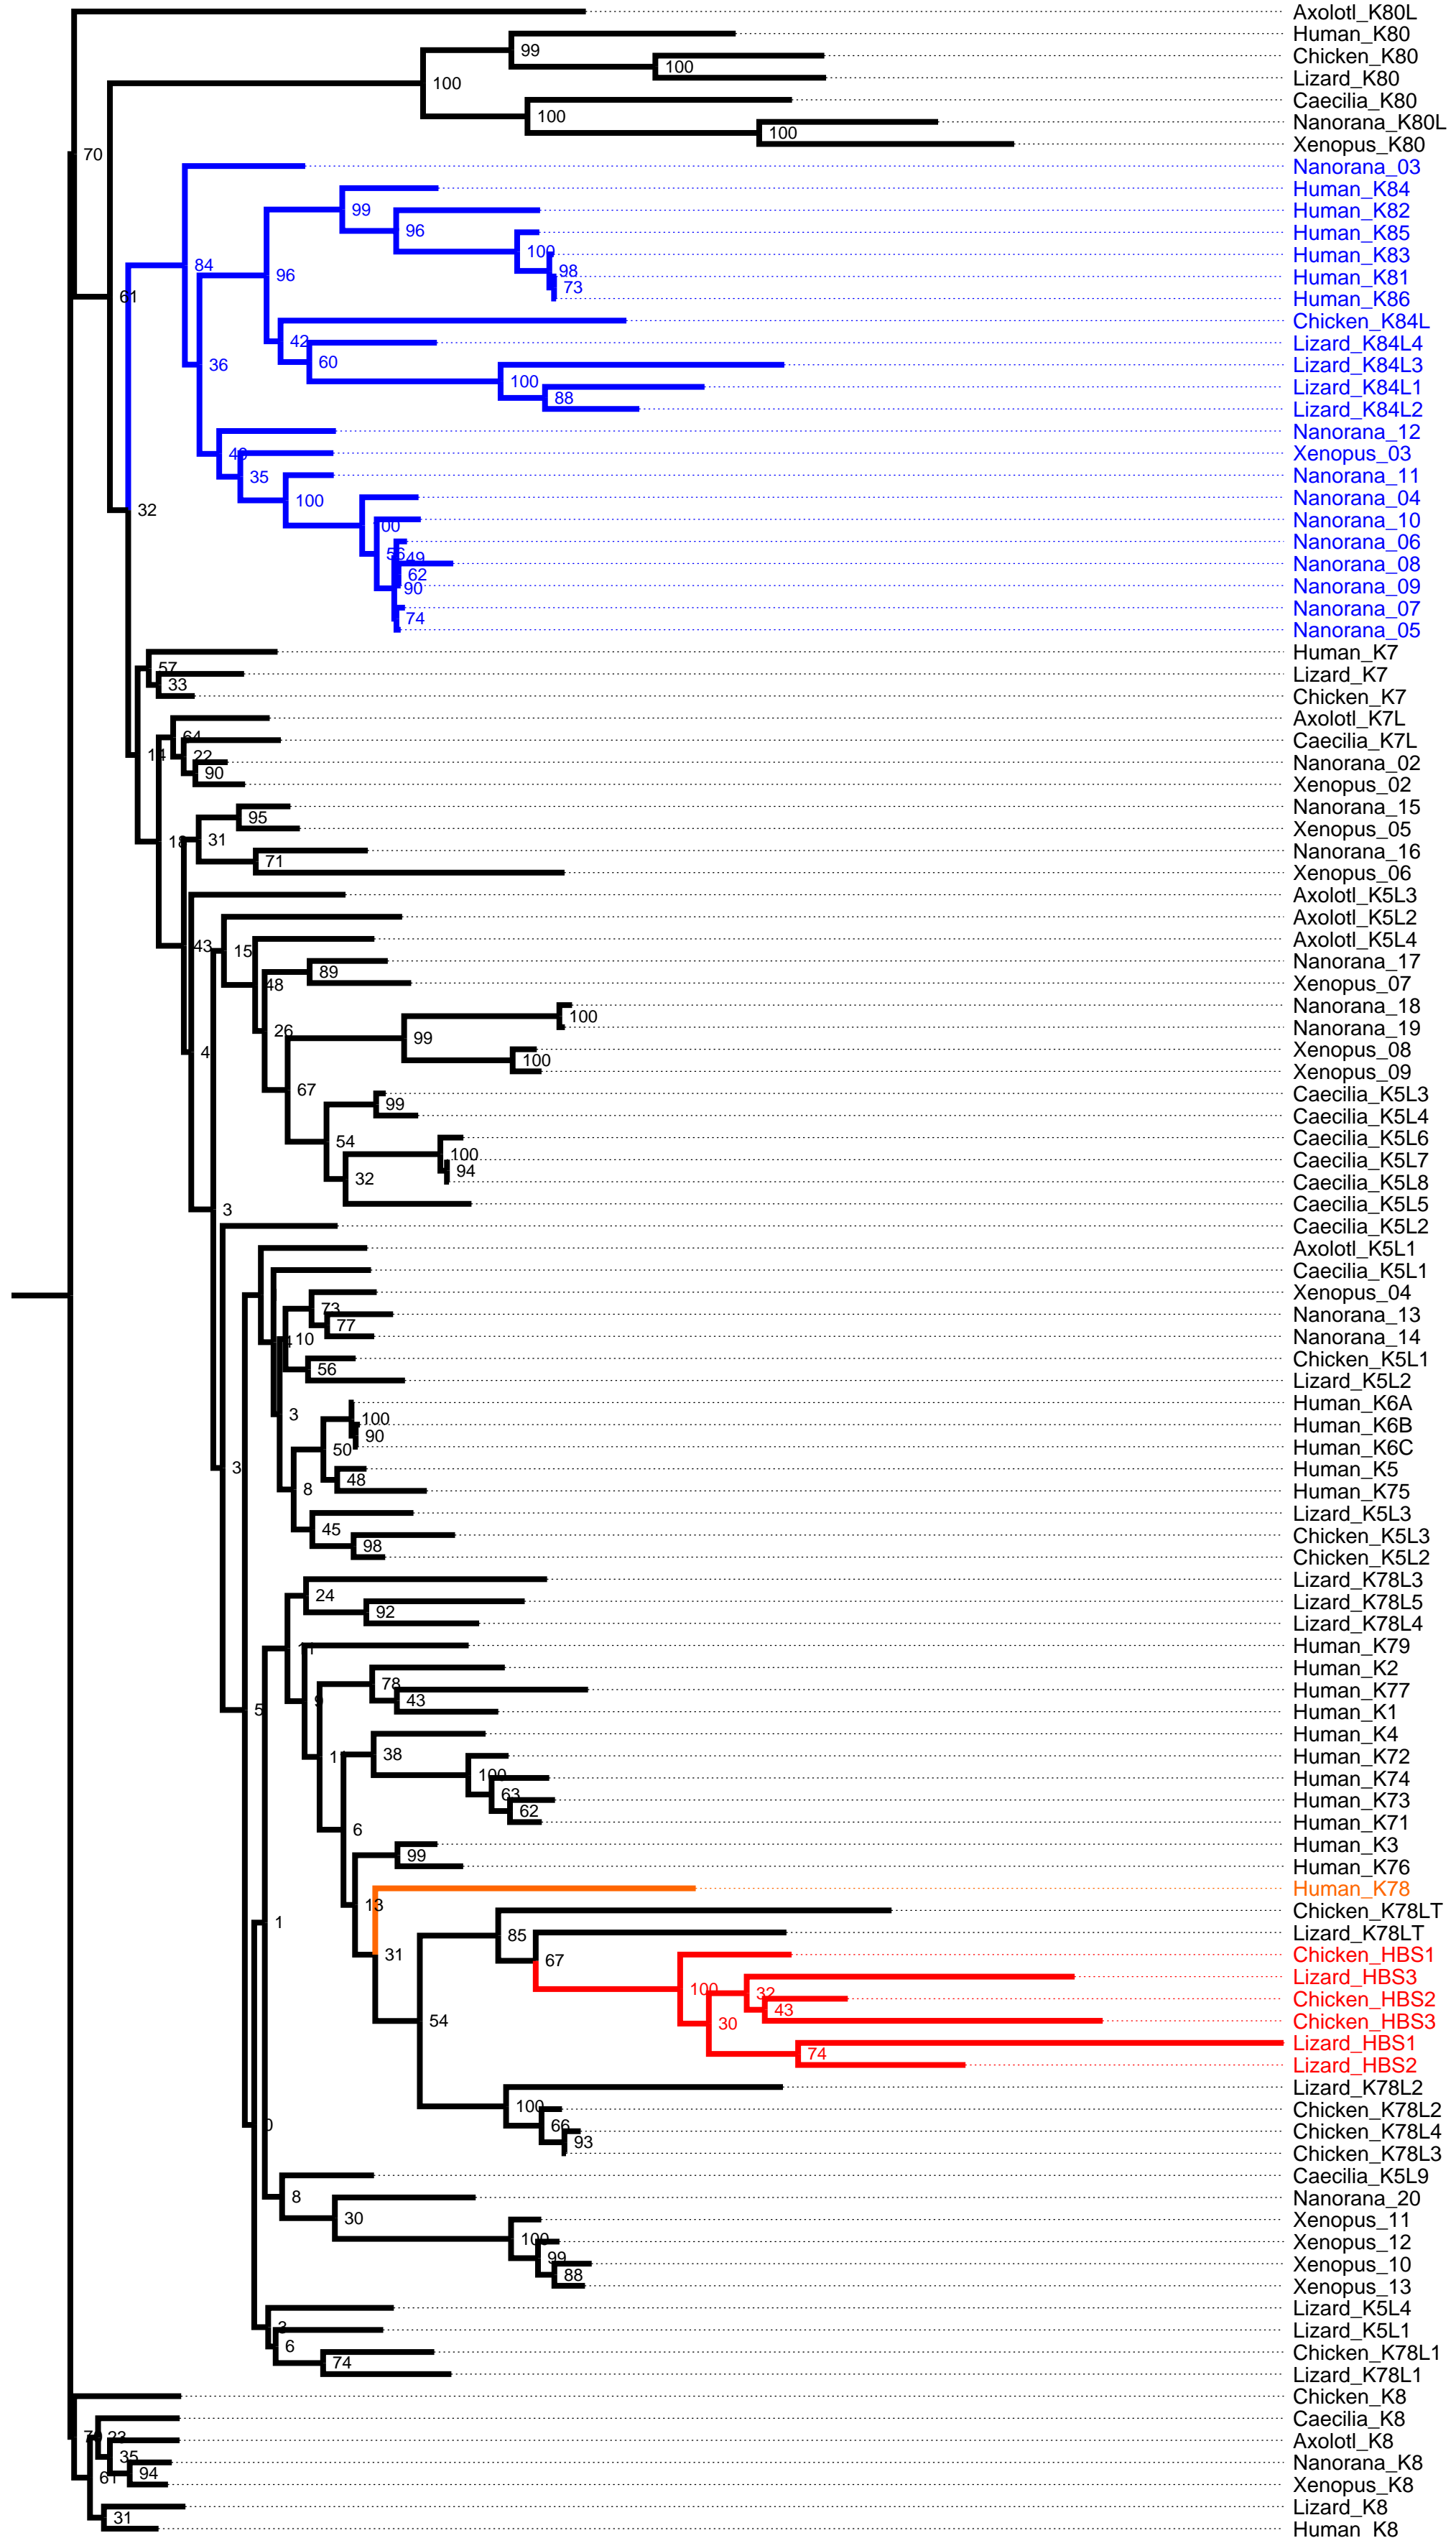

Suppl. Fig. S7. Maximum likelihood phylogenetic analysis of type II keratins of amphibians (*X. tropicalis*, Tibetan frog, axolotl, caecilian), chicken, lizard, and human. The phylogenetic tree was generated with PhyML. Sauropsid-specific cysteine-rich keratins (HBS) are shown with red fonts and lines. Hair keratins and orthologs are indicated with blue fonts and lines. Note that hair keratin orthologs of *Xenopus* and *Nanorana* have a low cysteine content. Bootstrap values are indicated. Bayesian phylogenetic inference yielded similar results. Amino acid sequences: Suppl. Fig. S1 and S2. Accession numbers and information about the genes: Suppl. Tables S1-S13.

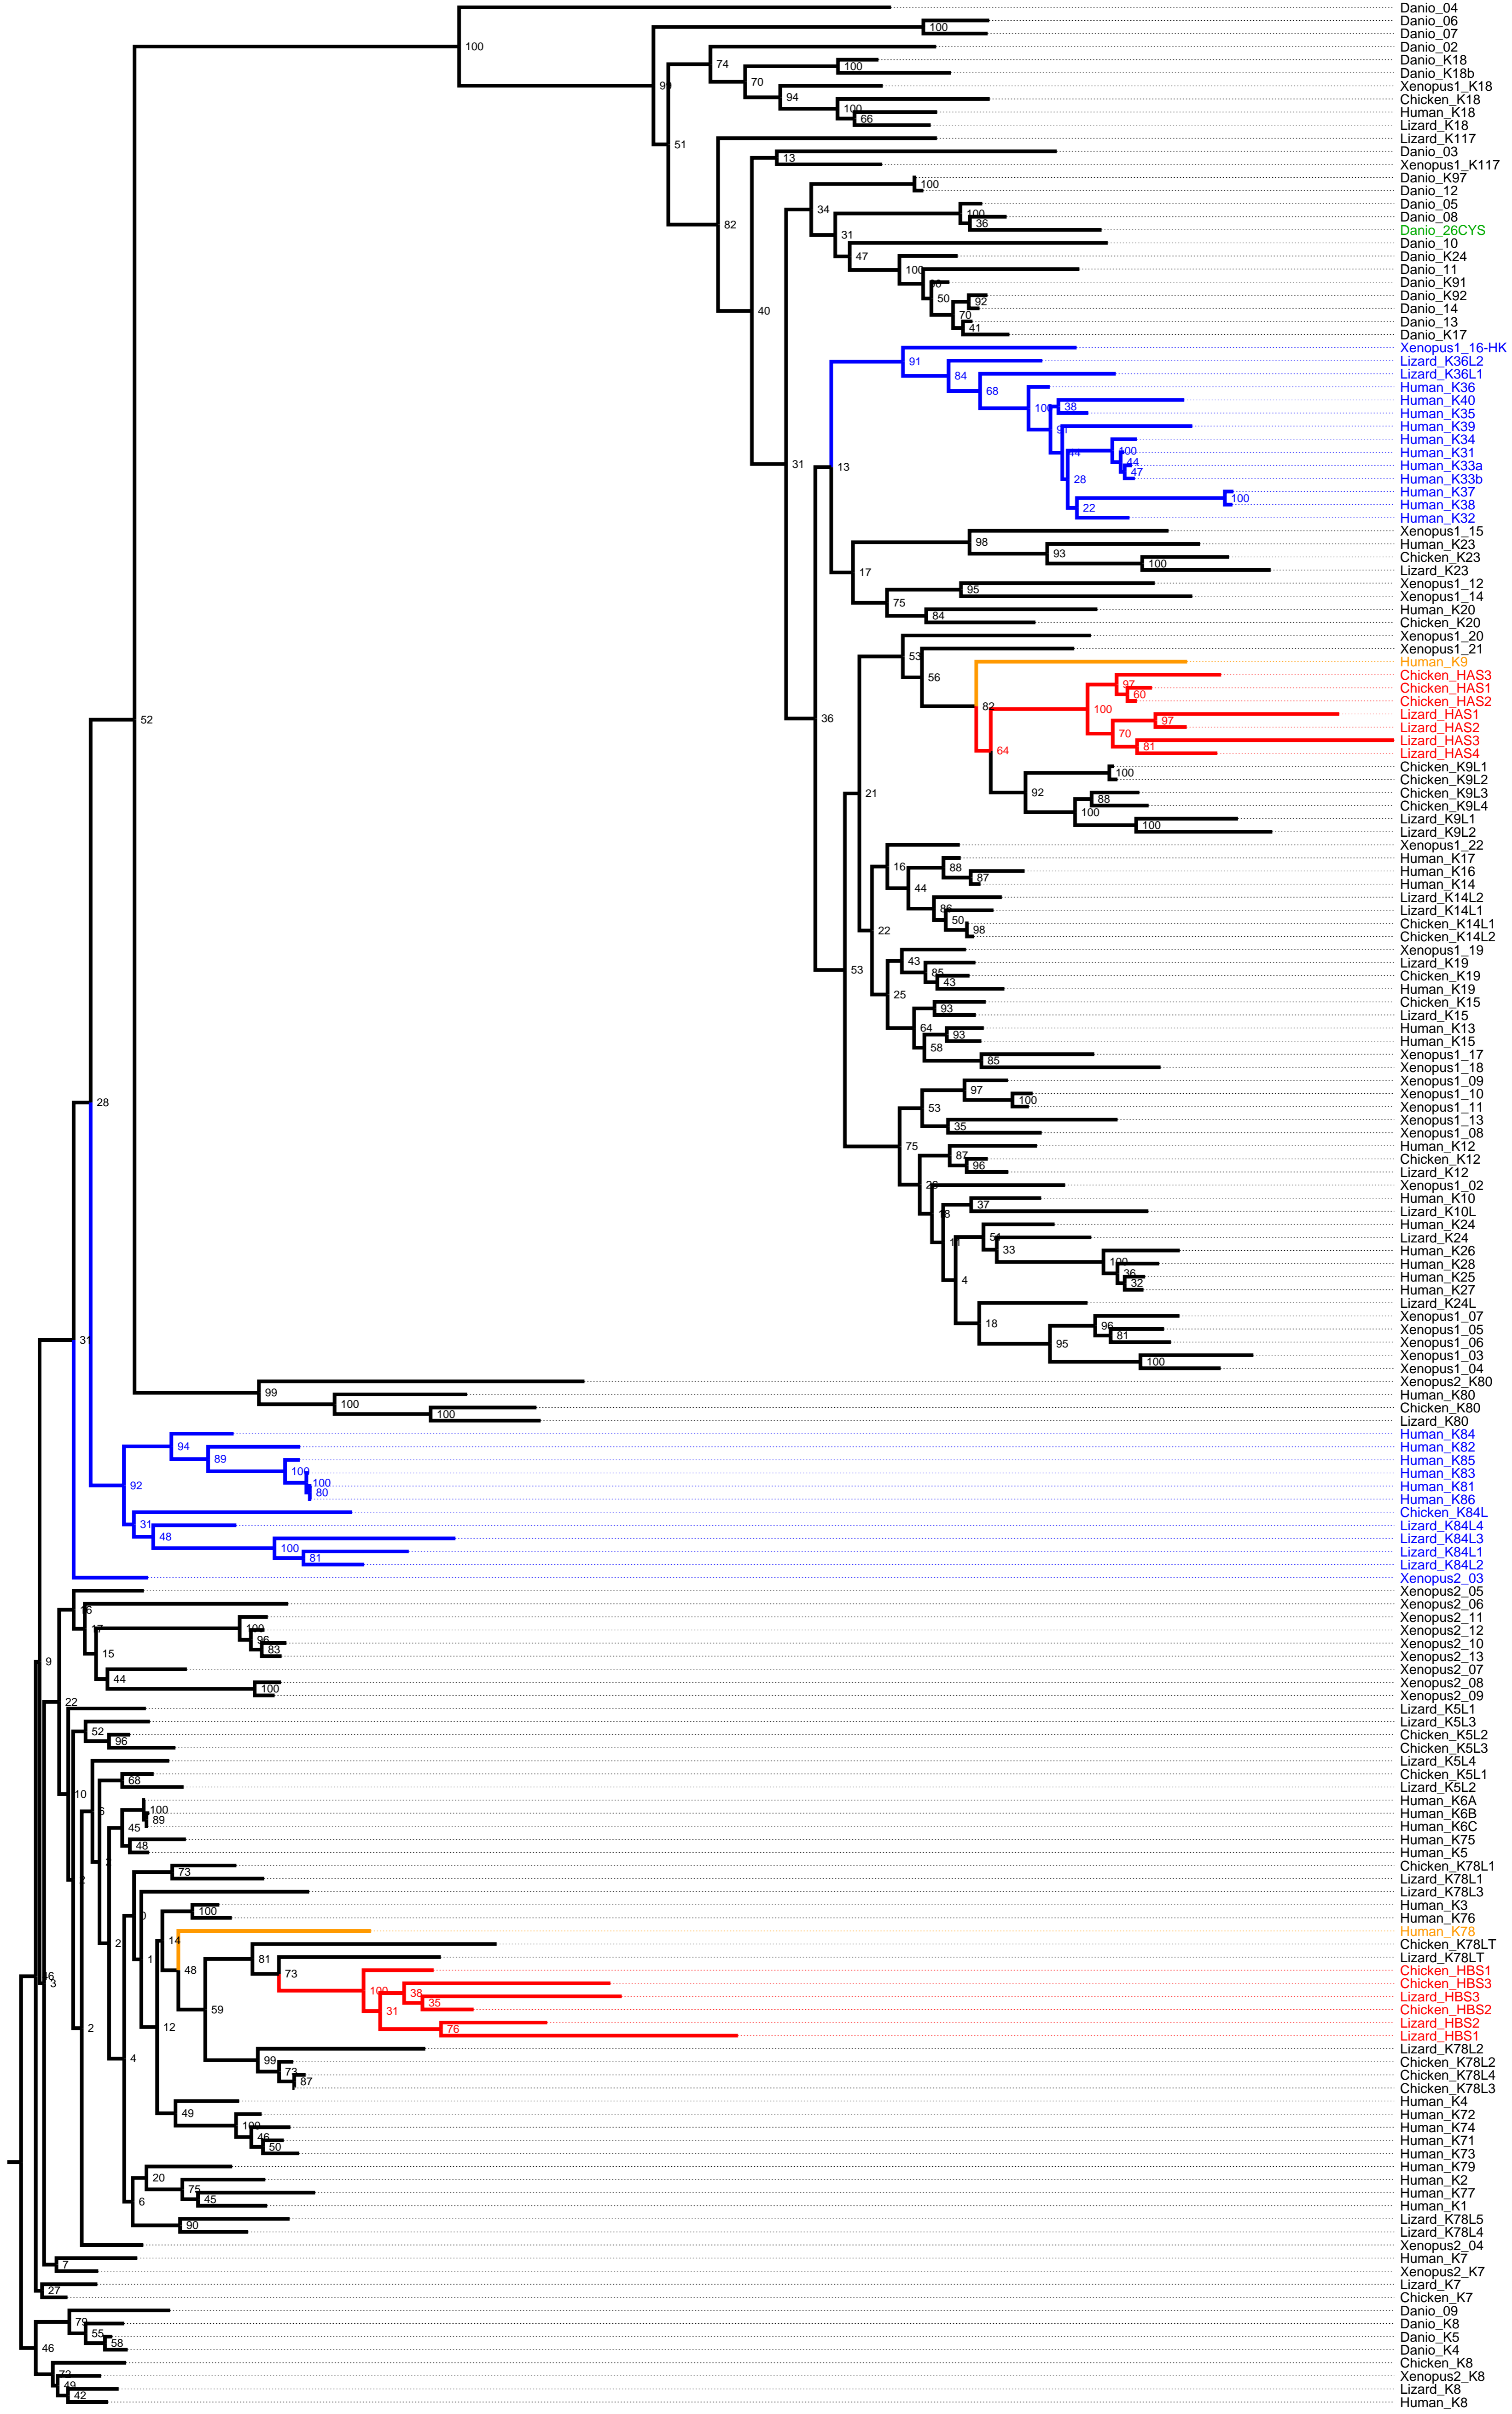

Suppl. Fig. S8. Maximum likelihood phylogenetic analysis of type I and type II keratins of fish (*Danio rerio*) and tetrapods (*Xenopus tropicalis*, lizard, chicken, human). The phylogenetic tree was generated with PhyML. Hair orthologs and orthologs are indicated with blue fonts and lines. Saurosid-specific cysteine-rich keratins (HAS and HBS) are shown with red fonts and lines. A fish keratin with 26 cysteine residues is highlighted by green fonts. Bootstrap values are indicated. Bayesian phylogenetic inference yielded similar results. Accession numbers of *Danio* keratins are shown in the Suppl. Table S14.

**A**

```

1-----100
E1BZZ9 -----
HAS1 MSCNIKETITVSSKGRSSGGSCIIIGGGGARISSYAIIGSRGFGSRSYCGGVNYGGGLSVGSLAGGSYGGGNCYGNLGFGLGGGVVVGGLGSDCLLSSC

101-----200
E1BZZ9 -----
HAS1 DEKVTMQNLNDRLASYLKVKLEKENAELECRIREWYATQGLSCEPRDYSCYYKEIEDLQNIVCATIDNNKIILDIDNSRMAADDFRVKYETELALRQ

201-----300
E1BZZ9 -----MNCLRKQSTGDVSVVEVNACPGPDLRQILEDLRCQYETLIARNRKEVEDWYECKIEE
HAS1 SVEADINGLRQVLDQLTLCRSDLEAQLLESREELCCLKNHEEEMNCLRKQSTGDVSVVEVNACPGPDLRQILEDLRCQYETLIARNRKEVEDWYECKIEE

301-----400
E1BZZ9 VNREVITSGQEVETCNNQVTELRRQLQALEIDLQAQLSQRNNESSLAETECQYNTLLGELQNQITCVEQQLAEIRAEIECQNQEYKTLLDVKCRLEQEI
HAS1 VNREVITSGQEVETCNNQVTELRRQLQALEIDLQAQLSQRNNESSLAETECQYNTLLGELQNQITCVEQQLAEIRAEIECQNQEYKTLLDVKCRLEQEI

401-----466
E1BZZ9 QTYRCLLEGGQQLIHGGGIGVGSVGGGVIRTSHYTTTTTASHCQPQVPPCKTGDIQVTCRRICD
HAS1 QTYRCLLEGGQQLIHGGGIGVGSVGGGVIRTSHYTTTTTASHCQPQVPPCKTGDIQVTCRRICD

```

**B**

```

1-----100
E1C8E5 -----
HAS2 MSSVSSGRYTTTCGIGSGRFGSRSYCGGVNYGGGLSSGSLVGGSYGGGLGAAVLGGCSGIGFSGGSARFGGIGGGLGISLGGGVVGGGFGDGIILLSGD

101-----200
E1C8E5 -----
HAS2 EKVTMQNLNDRLASYLKVKRLEQENADLECRIREWYAKQGPFCPEPRDYSCYYKEIEDLQNIVCATIDNNKIILNIDNSRMTADDFRVKYETELALRQS

201-----300
E1C8E5 -----MNCLRKQSTGDVSVVEVNACPGPDLRKILEEMRCQYETLIERNRKEVEDWYECKIEEV
HAS2 VEADINGLRQVLDQLTLCRSDLEAQLLESREELCCLKNHEEEMNCLRKQSTGDVSVVEVNACPGPDLRKILEEMRCQYETLIERNRKEVEDWYECKIEEV

301-----400
E1C8E5 NREVITSGQEVETCNNQVTELRRQLQALEIDLQAQLSQRDNLESSLAETECRYNNHLGELQITCVEQQLADLRAEMECQNQEYKILLDVK-----
HAS2 NREVITSGQEVETCNNQVTELRRQLQALEIDLQAQLSQRDNLESSLAETECRYNNHLGELQITCVEQQLADLRAEMECQNQEYKILLDVKCRLEQEI

401-----470
E1C8E5 -----
HAS2 TYRCLLEGGQQLIHGGGIGVGSVGGGVIRTSHYTTTSAQMPSCAAAEIQVPCRRICD

```

**C**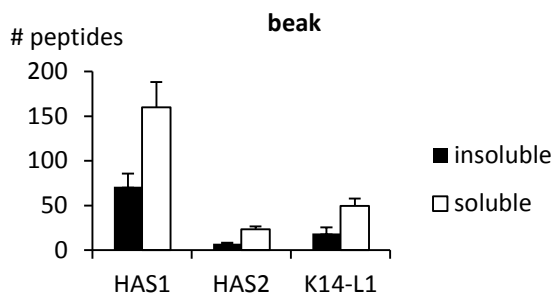**D**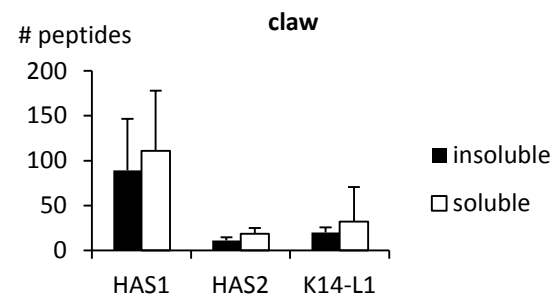**E**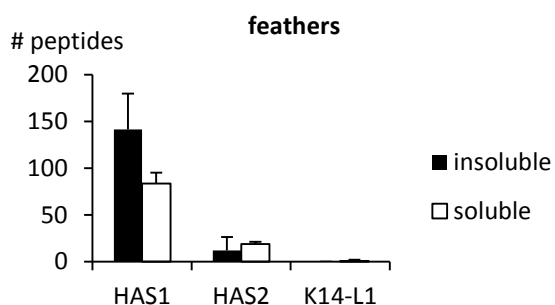**F**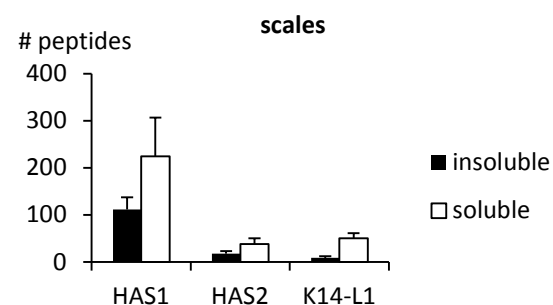

**Suppl. Fig. S9. Detection of HAS1 and HAS2 keratin fragments in the proteomes of hard skin appendages of the chicken.** Results of proteomic analysis of cornified chicken skin appendages (Rice et al., 2013) were re-analyzed using protein predictions as defined in the present study. Amino acid sequence alignments showed that E1BZZ9 (Uniprot accession number) and E1C8E5, that were detected by proteomics, corresponded to fragments of keratins HAS1 (A) and HAS2 (B), respectively. Red fonts mark identical residues. (C-F) Number of peptides detected by proteomics in cornified chicken skin appendages (soluble and insoluble fractions). Bars indicate means of n=4 samples. Error bars indicate standard deviations. Peptide counts of K14L1 (keratin 14-like 1) are shown for comparison.

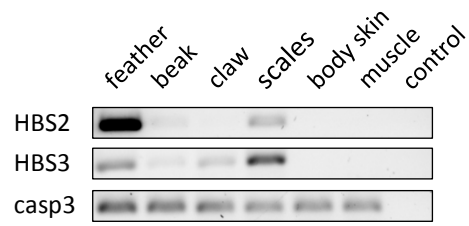

**Suppl. Fig. S10. Keratins HBS2 and HBS3 are differentially expressed in hard skin appendages of the chicken.** Gene expression was investigated by RT-PCR analysis on RNA extracted from chicken tissues. Caspase-3 (casp3) is ubiquitously expressed and was investigated for comparison. In a control reaction, no cDNA was added to the PCR. PCR products were run on an agarose gel and DNA was visualized by GelRed fluorescent dye.





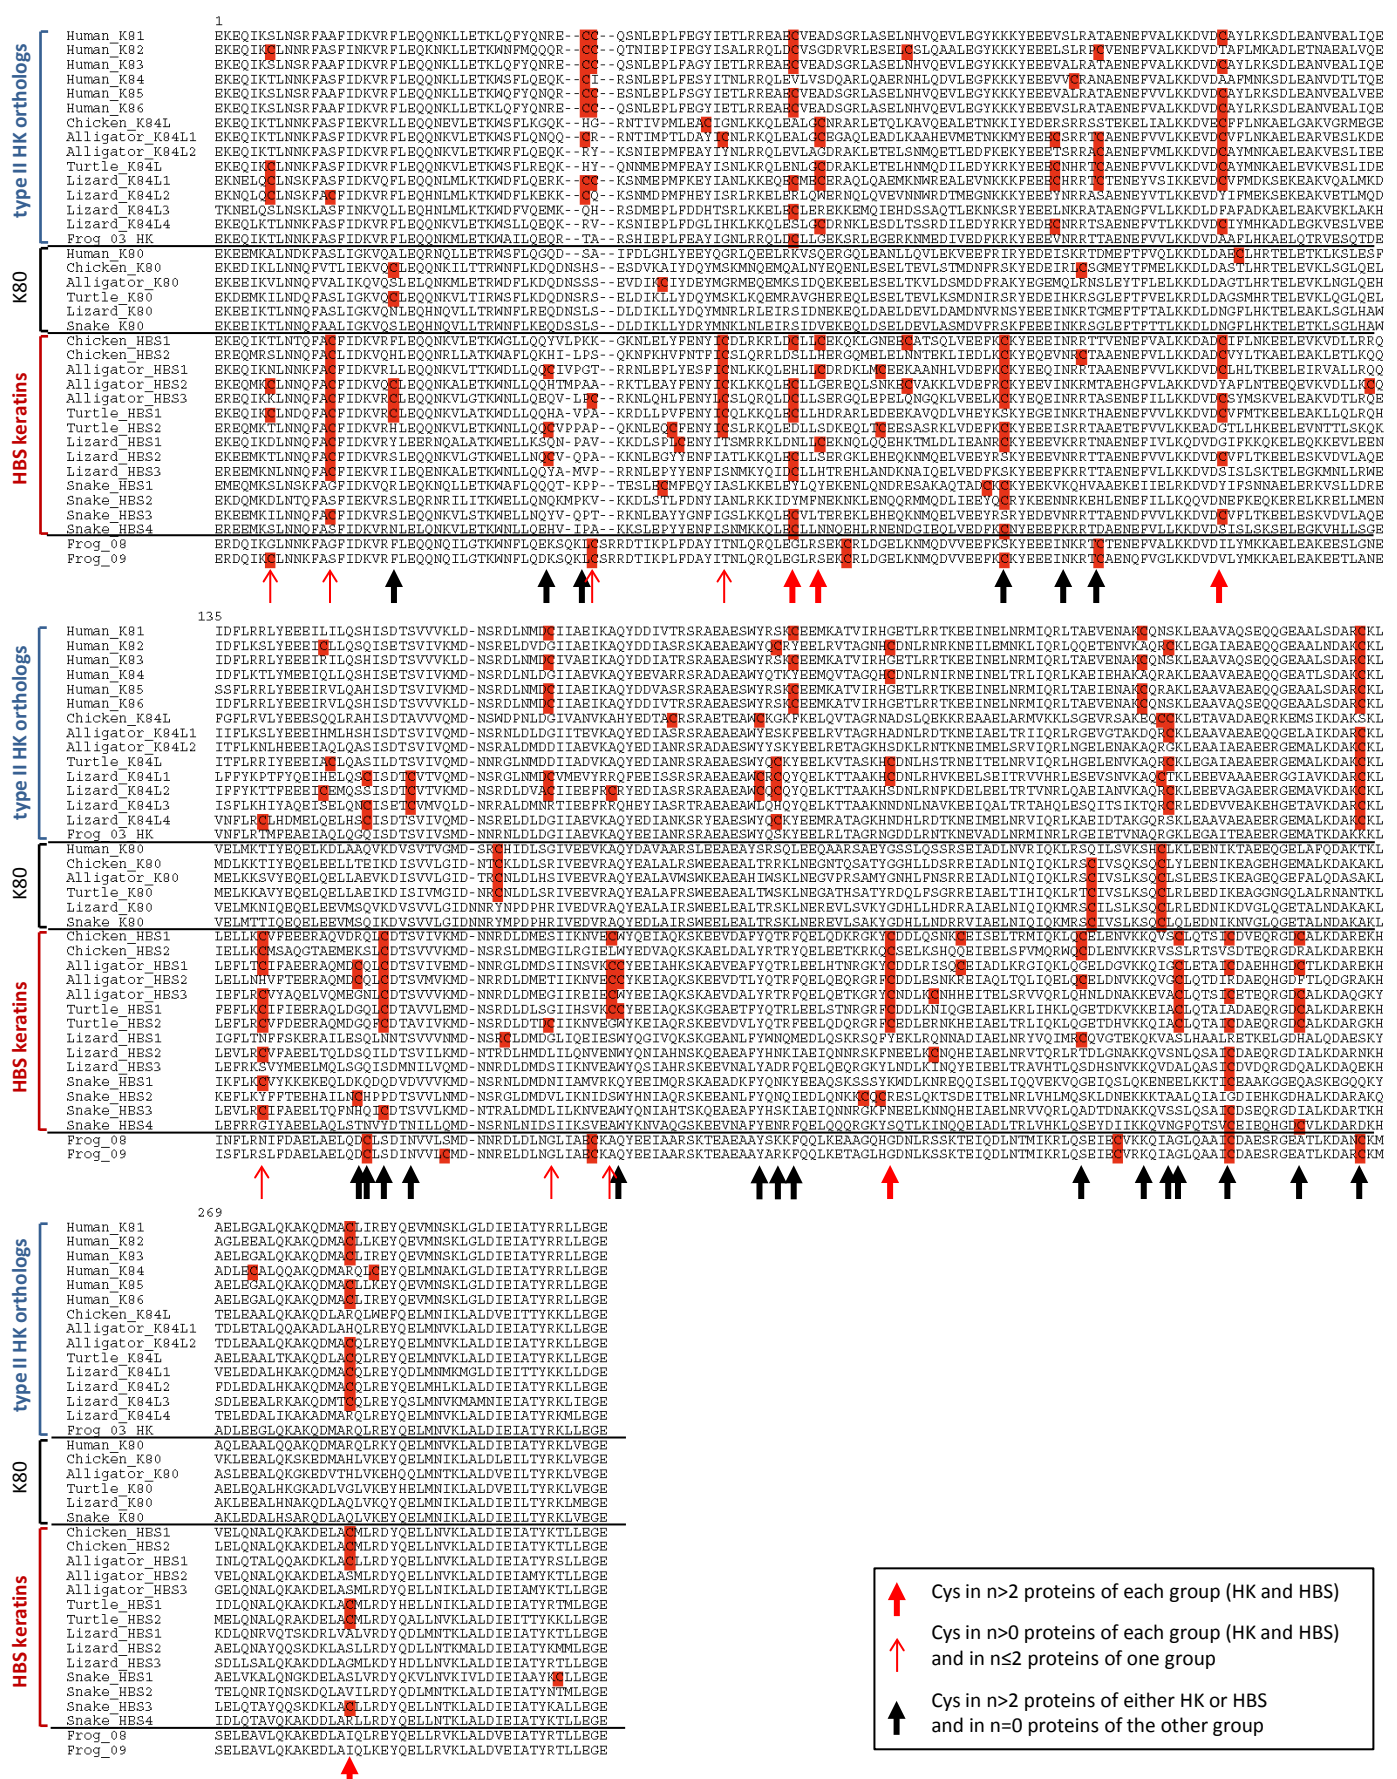

**Supplementary Figure S11. Comparison of positions of cysteine residues in the intermediate filament (IF) domains of hair keratin (HK) orthologs, HAS and HBS keratins.** The amino acid sequences of the IF domains of type I keratins (A) and type II keratins (B) were aligned with the Seaview program. Cysteine residues (C) are highlighted by red shading. The sequences of evolutionary ancient keratins with low to medium cysteine contents (K23 and K80) are included for comparison. Type I and type II frog (*X. tropicalis*) keratins with the highest cysteine contents are also included in the alignment. Vertical arrows indicate positions with cysteine in multiple proteins. Red arrows (definition in the boxed legends on the right) indicate likely convergent evolution towards cysteine at particular positions whereas black arrows indicate cysteine residues that are specific for either HAS or HBS or type I HK (without cys) or type II HK (without cys) keratins in K23, K80 or frog keratins). Due to a sequence gap in the genome sequence, the sequence of turtle HAS2 is incomplete at the amino-terminus.

>Chicken\_K12  
KKETMQNLNDRLAAYLDKVRSLLEDANTELEKIRIWEYKNGPGAAPVSGNDYSS--YYF  
I IEDLRNKI INATIDNARI ILQVDNARLAADDFRLKYENEVALRQSVESDINGLRRVLD  
LTLTRADLEMQIESLNEELAYLKNHEEELQGLQSSAV-GQVSVEMDAAPGIDLTKLLND  
MRGQYEVIAEQNRKAEAWFNEKSGELKREISTNTEQLQSGKSEITDLKRTQLNLEIELQ  
SQLAMKKSLEDTLAEETEGGYCAQLSQMQLQIGNLESQLLQVRADMERQSAEYQQLLDIKS  
RLEMEIETYRRLDGE  
>Chicken\_K20  
EKSTMQNLNDRLAAYLERVRSLEKANSLEKQIKWEHEKNTV----GVRSDYSS--YFQ  
TIEDLQSKIGAAQLENALVLQIDNARLAADDFRLKYENELLRQSVESDINGLRRVLD  
LTLTKSDLESQIENVNEEIVFLKKNHEEEDVRLRQVQV-GSVNVEVDAAPGDTLASIMEN  
MRQYQEMAEKNRQEKERFEKQTEALNQEVA INVEQLQEQRRREVTDRRQICQSELELQ  
THLNMKPLEDTLAEATEARYSFQLAQIQBTIAKLEAQLRQLRADMEAQNTSEYVLLDIKT  
RLELEIATYRRLLEGE  
>Chicken\_K23  
EKQTMQNLNDRLAAYLDKVRSLAANAQLESCILEWHKTKSH----GKRHDFNQ--YEQ  
NVTDMQRQIEDGKITNASILLQIDNANMAEDFRKLYEAEKTRRQGVQCDLENLRKELDG  
LTIITDLEMEIEGLREEHILRRKDHEEDMEANRSSQD-FKVNKVNAPPEDLTKILAE  
IREYBAI I EKNRQSLDSWYKELSTAVSLAADPNPEQVQSSNEBIKDLTRTLQSLDIELQ  
AQMSKHMLEDTLADTRNYVAVALQNMQQTISKCEBESLQRHDIRQHNQYRVLLGIKT  
RLEKEISTYRRLLEGN  
>Chicken\_K15  
EKITMQNLNDRLATYLVKVRLEADANAELVIRIWDYQKEAPS----SPARDYSN--YYK  
I IEDLQDKILAATIDNSRVVLEIDNARLAADDFRLKHENELFLRQSVESDINGLRRVLD  
LTLSRADLEMQIESLKEELAYLKNHEEEMKESYNQLS-GKVSVEVDAAPGIDLTKILAE  
MREQYBALAEKRYKDAEAWFLTQTTELNHEVATHTEQIQSSKSEITELRRMQSLEIELQ  
SQISMKAGLEANLRDTEGRYCAQLAQIQNLITSVEEQLSEIRCDMERQNEVYRMLMDIKS  
RLEQEIATYRQLLETQ  
>Chicken\_K19  
EKTTMQNLNDRLASYLKVRLEANSLETKIREWYKQGP----GPARDYSP--YYK  
AIEDLRDQILAATIDNSRVVLEIDNARLAADDFRKFTEQALRMSVEADINGLRRVLD  
LTLARTDLELQIENLKEELAYLKNHEEEMSLGGQVA-GQVSVEDSAPGIDLTKILAD  
MRDQYEHMAEKNRKDAEAWFHSKTEELNREVAVNTTEQLQSSKSEVTDLRRTLQGLEIELQ  
SOLSMKGALESTLADTEGRYCAQLAQIQDMIGSIEAQLAELRADMERQNEVYRMLMDIKT  
RLEQEIATYRQLLEGG  
>Chicken\_K9L1  
EKITMQNLNDRLASYLKVRLEEDNAQLELHIREWYKQAP----SVSKDYSS--YYQ  
TIEQLQNI I SATVDNRRMLLDIDNSKMTADDFRKYENELVIRQSVESDVNGLRNLDD  
LTHTRSSLESLESLKEELIALKRNHEEELRQLQSQTG-GDVSVEVNAAPGEDLTKILND  
LRNEYEQI I EKNRREVEQYEVKIEEVNRQVTSSSQDIQTS SHQLTELKREMQNLEIELQ  
AQLSTKNSLENSLAETESRYGCLLQIQGQINSVEEELANIRCEMEGQSQEYKMLLGIKT  
RLEQEIATYRALLNEG  
>Chicken\_K9L2  
EKITMQNLNDRLASYLKVRLEEDNAQLELHIREWYKQAP----SVSKDYSS--YYQ  
TIEQLQNI I SATVDNRRMLLDIDNSKMTADDFRKYENELVIRQSVESDVNGLRNLDD  
LTLVRSLESLESLKDELIALKRNHEEELRQLQSQTG-GDVSVEVNAAPGEDLTKILND  
LRNEYEQI I EKNRREVEQYEVKIEEVNRQVTSSSQDIQTS SHQLTELKREMQNLEIELQ  
AQLSTKNSLENSLAETESRYGCLLQIQGQINSVEEELANIRCEMEGQSQEYKMLLGIKT  
RLEQEIATYRALLNEG  
>Chicken\_K9L3  
EKITMQNLNDRLASYLKVRLEEDNAQLELHIREWYKQGP----TGSKDYSS--YYR  
TIEQLQNI I SATVDNRRMLLDIDNSKMTADDFRKYENELVIRQSVESDVNGLRNLDD  
LTLVRSLESLESLKDELIALKRNHEEELRQLQSQTG-GDVSVEVNAAPGEDLTKILND  
LRNEYEQI I EKNRREVEQYEVKIEEVNRQVTSSSQDIQTS SHQLTELKREMQNLEIELQ  
AQLSTKNSLENSLAETESRYGCLLQIQGQINSVEEELANIRCEMEGQSQEYKMLLGIKT  
RLEQEIATYRALLNEG  
>Chicken\_K9L4  
EKITMQNLNDRLASYLKVRLEENAHLELHIREWYKQGP----TGRKDYSS--YYT  
TIEQLQNI I TAAVETNKILLDNTNRTAEDFRKYTEYFGLRQNVADINTLRPLD  
LTLSTRDLEMQFESLKEELIYLLKKNHEEEMRGLQTQSS-GDVNVEVNAATPGTNLMEKLE  
MRCEYERLIENNRREVEQYEVKIEEVNRQVTSSSQDIQTS SHQLTELKREMQNLEIELQ  
SOLSMVDSLQSNLEDTERRYNMQLQIQGMI GPLEEELASIRCEMESQNEEYKMLLGIKT  
RLEQEIATYRALLNEG  
>Chicken\_HAS1  
EKVTMQNLNDRLASYLKVRLEENAHLELHIREWYKQGP----CEPRDYSS--YYK  
EIEDLQNI I VCATIDNKKI I LDIDNSRMAADDFRKYETELALRQSVESDINGLRRVLD  
LTLCSRDLQEAQLESLEELCCKLKNHEEEMNCLRQST-GDVSVEVNAAPGPDRLKILAE  
LRQYETLIARNRKEVEDWYECKIEEVNRREVITSGQEVETCQNNQVTELRRQLQALEIDLQ  
AQLSQRNLESLSLAETECRYNHLGELQITCQVEQLAELRAEIECQNEQYKTLLDVVK  
RLEQEIATYRCLLEGG  
>Chicken\_HAS2  
EKVTMQNLNDRLASYLKVRLEENAHLELHIREWYKQGP----CEPRDYSS--YYK  
EIEDLQNI I VCATIDNKKI I LDIDNSRMAADDFRKYETELALRQSVESDINGLRRVLD  
LTLCSRDLQEAQLESLEELCCKLKNHEEEMNCLRQST-GDVSVEVNAAPGPDRLKILAE  
LRQYETLIARNRKEVEDWYECKIEEVNRREVITSGQEVETCQNNQVTELRRQLQALEIDLQ  
AQLSQRNLESLSLAETECRYNHLGELQITCQVEQLAELRAEIECQNEQYKTLLDVVK  
RLEQEIATYRCLLEGG  
>Chicken\_HAS3  
EKATMQNLNDRLASYLKVRLEENAHLELHIREWYKQGP----CEPRDYSS--YFK  
EIEDLQNI I LCAAMETNKILLNIDNSQMTAEDFRKYETELALRQSVESDINGLRRVLD  
LASCKADLQCEAVTEEMCLRNHEEEMNCLRQST-GDVSVEVNAAPGPDRLKILAE  
LRQYETLIARNRKEVEDWYECKIEEVNRREVITSGQEVETCQNNQVTELRRQLQALEIDLQ  
AQLTMKENLESLSLAETECRYNHLGELQITCQVEQLAELRAEIECQNEQYKTLLDVVK  
RLEQEIATYRCLLEGG  
>Chicken\_K14L1  
EKETMQNLNDRLAAYLDKVRLEANLETKIREWYKQGP----GPERDYSP--YYR  
TIEELRSKILAAATVENANIVLQIDNARLAADDFRKFTEQALRMSVEADINGLRRVLD  
LTLSRADLEMQIESLKEELAYLKNHEEEMNCLRQVQV-GEISVEMDAAPGIDLTKILAE  
MREQYESLAEKNRRDAEQWFFSKTEELNREVAVNTTEQLQSGKTEITELRRITQSLDIDLQ  
SOLSTKAALGTLADTEARYGTQLAQLALITSVEEQLAELRCDMERQNEHYRVLLDVVK  
RLEQEIATYRRLLEGE  
>Chicken\_K14L2  
EKETMQNLNDRLAAYLDKVRLEANLETKIREWYKQGP----GPERDYSP--YYR  
TIEELRSKILGATVDNANLQLQIDNARLAADDFRKFTEQALRMSVEADINGLRRVLD  
LTLSRADLEMQIESLKEELAYLKNHEEEMNCLRQVQV-GEISVEMDAAPGIDLTKILAE  
MREQYESLAEKNRRDAEQWFFSKTEELNREVAVNTTEQLQSGKTEITELRRITQSLDIDLQ  
SOLSTKAALGTLADTEARYGTQLAQLALITSVEEQLAELRCDMERQNEHYRVLLDVVK  
RLEQEIATYRRLLEGE  
>Chicken\_K18  
EKETMQNLNDRLATYLEKVRLENNRRLEAQIRESLAKRGP-----STRDWGN--YWD  
TIQQLRDKIYDSAVENARTVLQIDNARLAADDFRKYEAELAIRTSVESDISGLRKVLDD  
TNMARLQLEGEIEALREELIPMKKNHEEEMNCLRQVQV-GEISVEMDAAPGIDLTKILAE  
LRAQYDALAKKNVEELEKQWQQISETTLEVTQSTKEVDTARSRLLELRRSVQSEIDL  
ALRSQRKLEGLSLEAETARYGAQLQGLIILRGEELAQARAEQRQNRHECALQDAKS

KLEAEIATYRALLEGG  
>Alligator\_K24  
EKETMQNLNDRLANYLKDVHVALEEANADLEYKIHQWYKHKGPAAA--ELTRDYK--YYQ  
I IEDLRNQII SATIGNASIVLQIDNSQLAAEDFRKLYENELFLHRSVEADSNGLRRVLD  
LTIKSNLEAQLESLELVEVYKKSHEEMKSLKSTST-GDVNVEINAAFGIDLTKLND  
MRAQYESLAEQNRREAEQFNKMSQPLQKQIYDAGAVSSATNELTEMKRTIQGLEIELQ  
TVMAQKCSLEGTLARTEENYSAQLSQRQLHISNLEEQLQIRSEMEEQNAEYEQLLGIK  
RLEMEIETYRRLDGE  
>Alligator\_K10L  
EKETMQNLNDRLASYLEKQVQALEEANAELHKKIKDWYETLGSYTE--GGRDYK--YYT  
TIEDLRNQIIAATVENASII LQTDNARLAVDDFKVYENELVLRQVNEADIRGLRKLVD  
QTLAKSNLEIQIESLAEVAVYLLKKNHEEMNDRSSAS-PDVNVEINTAPGIDLTTRLNK  
MRTEYALAEQNRKDVETWFNEKSKELNVQINFSAEETNTNKSQITELKRTFQGLEIEMK  
SQLALKQSLEATLAETEARYCAQLSQIQVVISVETQIQIIRDDMEWQNAEYEQLLDIK  
HLEMEIETYRHLIDRE  
>Alligator\_K12  
KKETMQNLNDRLAAYLKDVRSLAEANTELEHKKIREWYKNGPGAGSLGAGNDYK--YYP  
I IEDLRNKI INATIDNARIVLQIDNARLAADDPRKLYENEVALRQSVNEADINGLRRVLD  
LTLTRADLEMQIESLNEELAYLLKKNHEEELQGFQGNAT-GQVSVEMDAAPGIDLTKLND  
MRQYEAIAEQNRKDAEAWFNKSGELKKEISTNTQLQSGRSEITDLKRTFQGLEIELQ  
SQLAMKKSLEDTLAETAGYCTQLSQMQLQIGNLENQLFQVRADMERQNAEYQQLDIK  
RLEMEIETYRRLDGE  
>Alligator\_K20  
EKLTMQNLNDRLASYLEKVSLEKTNQLEKQIREWYANNS----STRQDYSP--YYN  
TIEELRNKIGAAQLENARLILQIDNAKLAADDPRKLYESELAI RQGAENDTAGLLKVIDD  
LTLTKADLESQVEMTEELAFLLKKNHEEELVDRKRLQGLG-TVNVVEVDAAPSIDLAKIMEN  
MRQYEAIAEQNRKDAEAWFNKSGELKKEISTNTQLQSGRSEITDLKRTFQGLEIELQ  
SQLSMKKALEDTLAETEARYGSLAQIQAAGNVEGQLVQVRADMERQNEYNILLDVK  
RLEMEIATYRRLLEGE  
>Alligator\_K23  
EKQMMQNLNDRLAAYLKDVRSLAEANAQLESCIVEWHKRRSH----GKRYDFNQ--FEQ  
SIADMQQIQDGKISNASVLLQIDNAKLAASEFRKLYEAEKYQREGVQFDVNELRKELDN  
LTIIVTDLMEIEGLEEEHILRKKDHEADMEQRSTKD-VNVNVEVDAAPSIDLAKIMEN  
IRQYETLIEKNQCEVEDWYHTQMEELNKEVISDEEQLQGCQNEIIQLKHTVQALEIDLQ  
AQLSKKALENTLSETRAHYASRLQNIQEFISKEBELSLRHDVRCQSNKYKVLGDIK  
RLEREISTYQLLEGR  
>Alligator\_K36L1  
GKETMQNLNDRLASYLEKVSLEKENTLERKIREWQECQTP----LVCTDFSS--CYS  
TTEELQQQICSAARAENARLRLDIDIVKVASDDFSFKYEEHGLCQSAEADISSLHRFLDD  
LTLCKADLETELESLETEELLCLRNHEEELASPLRRLQGLG-DCINVELDAPSCDLNKLVEE  
IRQYETLIEKNQCEVEDWYHTQMEELNKEVISDEEQLQGCQNEIIQLKHTVQALEIDLQ  
TQHSNLTALESTLTDTEARYSHQLELQCLISNMEAQLAELRSDIEHQNSEYKVLDDVKS  
QLDCEISAYRRLDEE  
>Alligator\_K36L2  
EKETMQFLNDRLACYLEKVRFLQENADLEYKIREWYECQTP----VYVYDFNC--YYK  
MIEELQQQICCAKADNARLCLVDNKLVAADDYATKYEEHGLCQSAEADSVKSLRRLD  
LTLCKADLETELESLETEELLCLRNHEEELASPLRRLQGLG-DRINVELDAPSCDLNKLVEE  
IRQYETLIEKNQCEVEDWYHTQMEELNKEVISDEEQLQGCQNEIIQLKHTVQALEIDLQ  
TQHNLNLALENTLAEETHYSQLELQCLVSDVEVQLAELRSDIEHQNSEYKVLDDAK  
QLDCEISVYHSLDVE  
>Alligator\_K36L3  
EKETMQFLNDRLACYLEKVRHLEQENADLECKIREWYECQVP----YVCTDFQA--FYK  
TIEELQQQILCAKTNNAKMLVQIDNARLAADDPRKLYESELAI RQGAENDTAGLLKVIDD  
FTLCKADLETELESLETEELLCLRNHEEELASPLRRLQGLG-ARVNVVEVDAAPSCDLNKLVEE  
IRQYENLVENNRKDAEAWFNKSGELKKEISTNTQLQSGRSEITDLKRTFQGLEIELQ  
AQTSMKSTLECTLHETENRYASQLAHLQCLITNVEAQLAELRCDIERQNEQYKMLLDIK  
RLETEIATYRRLLEGE  
>Alligator\_K15  
EKITMQNLNDRLASYLKDVRALEEANADLEVKIRDWYKQGP----SPARDYSP--YYK  
TIEDLRDKILAAATIDNSRIILEIDNARLAADDPRKLYESELAI RQGAENDTAGLLKVIDD  
LTLARADLEMQIENLKEELAYLLKKNHEEEMREYSNQMT-GKVSVEVDAAPGVDLTKVLAE  
MRQYEAIAEQNRREAEAWFNKSGELKKEISTNTQLQSGRSEITDLKRTFQGLEIELQ  
SQLSMKAGLEANTLATESRYCAQLAQIQAAGNVEGQLVQVRADMERQNEYNILLDVK  
RLEQEIATYRRLDGE  
>Alligator\_K19  
EKITMQNLNDRLASYLKDVRALEEANSELEIKIRDWYKQGP----GPRDYSP--YYK  
TIEDLRDKILAAATIDNSKIVLQIDNARLAADDPRKLYESELAI RQGAENDTAGLLKVIDD  
LTLARTDLEMQIENLKEELAYLLKKNHEEEMNAHAGQAG-GQVSVVEVDSAPGIDLTKLAE  
MRDQYEFMAEKNRKDAEAWFNKSGELKKEISTNTQLQSGRSEITDLKRTFQGLEIELQ  
SQLSMKAALEGTLDATENRYGAQLSQIQCLISNIEAQLGDLRAEMERQNEYNILLDVK  
RLEQEIATYHQLLEGG  
>Alligator\_K9L1  
EKTTMQNLNDRLATYLDKVRLEEEANADLEERIREWYKQGP----SISKDYSP--YYQ  
TIEQLQNIISATVDNKLVLIDNTRMTADDPRKLYESELAI RQGAENDTAGLLKVIDD  
LTVRSTLELEVEVTELDKELLTLKKNHEEEMRLLQSQSG-GDVNVEVNAAPGQDLTKILND  
MRQYEEIIAKNRREVEQWYEVKMEEVNQVTSQSGQEVQTSSSHQLTELRRVQGLEIELQ  
TQLSMKASLENNLAETEARYGAQLSQIQAMINCVBEELAQLRCMESQNEQYKMLLDIK  
RLEQEIATYHGLLEGG  
>Alligator\_K9L2  
EKMTMQNLNERLASYLKDVRRLEEEANLERLIREWYQNHGP----QCGRDYSP--YYG  
PIEDLQNIISATVDNKLVLIDNTRMTADDPRKLYESELAI RQGAENDTAGLLKVIDD  
LTLARSDLEAQYESLKEELISLKNHEEEMRLLQSQSG-GDVNVEVNTTPDSNLMQKLE  
MRCEYEQI IENNRKEVERWYETKMEEVNQEVHTSQGEIQSSNHQVSELRRDYQGLEIELQ  
SQLSMVQSLQSNLEDTERRYNIQLQIQNTITTVBEELANIRCEIESQNEQYKMLLDIK  
HLEQEIATYRALLEEG  
>Alligator\_K9L3  
EKMTMQNLNERLASYLKDVRRLEEEANLERLIREWYQNHGP----QCGRDYSP--YYG  
PIEDLQNIISATVDNKLVLIDNTRMTADDPRKLYESELAI RQGAENDTAGLLKVIDD  
LTLARSDLEAQYESLKEELISLKNHEEEMRLLQSQSG-GDVNVEVNTTPDSNLMQKLE  
MRCEYEQI IENNRKEVERWYETKMEEVNQEVHTSQGEIQSSNHQVSELRRDYQGLEIELQ  
SQLSMVQSLQSNLEDTERRYNIQLQIQNTITTVBEELANIRCEIESQNEQYKMLLDIK  
HLEQEIATYRALLEEG  
>Alligator\_K9L4  
EKMTMQNLNERLASYLKDVRRLEEEANLEQLIREWYKQGP----QGGRDYSP--YYK  
TIEDLQNIISATVDNKLVLIDNTRMTADDPRKLYESELAI RQGAENDTAGLLKVIDD  
LTLARSDLEAQYESLKEELISLKNHEEEMRLLQSQSG-GDVSVEVNAAPGNTLTKLENE  
MRGEYERL IENNRREVEWFAKMEEVNQVHSSSQMESQNEQYKMLLDIK  
SLLSMLQSLQSNLEDTERRYNMQLQIQAMIPVEBEELANIRCEIESQNEQYKMLLDIK  
RLEQEIATYRALLEEG  
>Alligator\_K9L5  
EKMTMQNLNERLASYLKDVRCLEEDNLQLERLIREWYQTHGP----QGGKDYSH--YYG  
PIEDLQNIISATVDNKLVLIDNTRMTADDPRKLYESELAI RQGAENDTAGLLKVIDD  
LTLAKSDLEMQFESLREELIQKKNHEEEMRLLQSQSG-GDVSVEVNAAPGEDLMGKLE  
MRKEYEYIIQRNREVEWYETKMEEVNQEVHTSQGEIESQNEQYKMLLDIK

SQLSTLQSLQSNLEDDYRYNMQLQIQNMI PVVEELASIRCEMESQNEEYKMLLGIKT  
RLEQEICQYRELLDEG  
>Alligator\_HAS1  
EKITMQNLNDRLASYLKVRLEEEENAELECRIREWYAKHGPT----CEPKDYSC--YLR  
EIEDLQNIQVATINENKIVLNIDNSRMAADDFRKYETELSLQSVADINGLRQVLDQ  
LTLCRSDLEAQLKLEELCCKLKNHEEEMCLRKQST-GDVSVEVNTCPGPDQLQVLDL  
MRCQYEAIAQNRKEVEDWYACKIEEVNREVISSGQIECSNSQVCELRRQLALEIDLQ  
AQIRMRDNLQSSLAETECRYNNQLAELQNIICVEQQLAELRAEIECQNEQYKVLDDVCK  
RLEQEIHTYCCLLEGG  
>Alligator\_HAS2  
EKITMQNLNDRLASYLKVRLEEEENAELECRIRDWYAKHGPT----CEPKDYSC--YLR  
EIEDLQNIQVATVNNKIILIDNSRMTGDDFRMKYETELALQSVADINGLRQVLDQ  
LTLCRSDLEAQLKLEELCCKLKNHEEEMCLRNQST-GDVMVEVNSCPGPDQLQVLDL  
MRCQYEAIAQNRKEVEDWYACKIEEVNQEVISSSKEIECSNSQVSELRRQLALEIDLQ  
SQLRMRDNLQSSLAETERRYNQLAELQNIICVEQQLAELRAEIECQNEQYKVLDDVCK  
RLEQEIHTYCCLLEGG  
>Alligator\_K14L1  
EKETMQNLNDRLAAYLDKVRLEEEANSELEIKIRDWYKKGPT----GPRDRYSP--YYR  
TIEDLRNKILSATVDNANLILQIDNARLAADDFRKFETEALRMSVEADINGLRRVLDL  
LTLARADLEMQIENLKEELAYLKNHEEEMNLRGQVG-GEITVEMDAAPGVDLTKILTE  
MREQYEHADKNRREAEQWFKQTEELNQEVAINTEQLQSSKSEITELRRTIQGLEIELQ  
SQLSTKAALQGLTADTEARYGSQLAQIQGLITSVEQLAELRCDMERQNHAYKILLDVKC  
RLEQEIATYRRLLEGE  
>Alligator\_K14L2  
EKETMQNLNDRLAAYLDKVRLEEEANSELEIKIRDWYKKGPT----GPRDRYSP--YYR  
TIEDLRNKILSATVDNANLILQIDNARLAADDFRKFETEALRMSVEADINGLRRVLDL  
LTLARADLEMQIENLKEELAYLKNHEEEMNLRGQVG-GEITVEMDAAPGVDLTKILTE  
MREQYEHADKNRREAEQWFKQTEELNQEVAINTEQLQSSKSEIMELRRTIQGLEIDLQ  
SQLSMKAALQGLTADTEARYGSQLAQIQGLITSVEQLAELRCDMERQNHAYKILLDVKC  
RLEQEIATYRRLLEGE  
>Alligator\_K117  
EKETMQNLNDRLAAYLKVRSLEEEANGQLEQRQIQLQVKK-----TLARHYDPSFCFS  
TIAELRSQIQDESVRNSQLTLQDNALAADDFRKYEAELATRLGVEDIKGLRQVLDL  
LTLARADLEMQIENLKEELAYLKNHEEEMNLRGQVG-GEITVEMDAAPGVDLTKILTE  
MREQYEHADKNRREAEQWFKQTEELNQEVAINTEQLQSSKSEIMELRRTIQGLEIDLQ  
MLQSTKEALEGTLAETESHYGVMAQLQNLVAGKEAELALRDTDRQANEYQHLLDLKT  
RLEVEIATYQHLLLEGG  
>Alligator\_K18  
EKETMQNLNDRLASYLEKVRSLTANHNLEEVQIREFLDKKGP-----STQDWTN--YWD  
IIEDLRNKIIEESVDNARIVLQIDNARLAADDFRKYEGELAIRQSVADINGLRQVLDL  
LTLARADLEMQIENLKEELAYLKNHEEEMNLRGQVG-GEITVEMDAAPGVDLTKILTE  
MREQYEHADKNRREAEQWFKQTEELNQEVAINTEQLQSSKSEIMELRRTIQGLEIDLQ  
SLRNLKGSLEANTMEVENRYGMQLEHLNGLLLRTEAELMQVRETEVQRQAEYQALLNIKV  
KLEAEIATYRRLLEGG  
>Turtle\_k24  
EKGTMQNLNDRLAAYLDKVRLEEEANADLEHKIRQWYKHDPA---GLRYDYSC--YYQ  
IIEDLRNKIISATIDNANLILQIDNARLAADDFRKYENELFLHQSIEADINGLRRVLDL  
LTLARADLEMQIENLKEELAYLKNHEEEMNLRGQVG-GEITVEMDAAPGVDLTKILTE  
MREQYEHADKNRREAEQWFKQTEELNQEVAINTEQLQSSKSEIMELRRTIQGLEIDLQ  
SLLAKKCSLEGLTAEIEGNYGQLSQIQQLISNLEEQLKQIRSEMERCQNAEYQLLGIKT  
RLEMEIATYRRLLEGG  
>Turtle\_k12  
EKETMQNLNDRLAAYLNKVSLEEGNTDLEHKIREWYKNGPGAGGPGAGHDYSC--YYP  
IIEDLRNKIINASIDNARIVLQIDNARLAADDFRKYENELAIRQSVADINGLRRVLDL  
LTLARADLEMQIENLKEELAYLKNHEEEMNLRGQVG-GEITVEMDAAPGVDLTKILTE  
MREQYEHADKNRREAEQWFKQTEELNQEVAINTEQLQSSKSEIMELRRTIQGLEIDLQ  
SQLAMKKSLEDTLAEIEGNYGQLSQIQQLISNLEEQLKQIRSEMERCQNAEYQLLGIKT  
RLEMEIATYRRLLEGG  
>Turtle\_k20  
EKLTMQNLNDRLASYLEKVFLEKANSQLEKQIREWYANSSS----TTRHDHSP--YFK  
TIEDLRNKIIGAHLNARLLLQIDNARLAADDFRKYENELAIRQSVADINGLRRVLDL  
LTLARADLEMQIENLKEELAYLKNHEEEMNLRGQVG-GEITVEMDAAPGVDLTKILTE  
MREQYEHADKNRREAEQWFKQTEELNQEVAINTEQLQSSKSEIMELRRTIQGLEIDLQ  
SQLSTKKALEDTLAEIEGNYGQLSQIQQLISNLEEQLKQIRSEMERCQNAEYQLLGIKT  
RLEMEIATYRRLLEGG  
>Turtle\_k23  
EKQTMQNLNDRLAAYLEKVRSLAANAQLESCILEWHKRRSH----EKKHDFNQ--YEQ  
NITDMQIQIIEGKITNASIFLHIDNAKIASDLSLKYVEVEQSLRQGMQISVENLRKELDN  
LTIIVTDLMEIEGIEEQLRKKDKHEKDMGEHSSQD-FKVNQVNAVPKEDLAKILAG  
IRKDYEAIEKNHQGLEEVYKQETATVSPATNISPBEIQSNESEITKNLRTQFALEIELQ  
AQFSKYYALKGTLAETQAHYTFQLQNIQQSISNCEEELSQRQDIKQCNHYYKILLGIKT  
RLEKEISTYRQLLEGT  
>Turtle\_k15  
EKVTMQNLNDRLASYLKVRLEEEANSELEIKIRDWYKKGPT----GPRDRYSP--YYK  
IIEDLRNKILSATIDNARIVLQIDNARLAADDFRKYENELFLRQSVADINGLRRVLDL  
LTLARADLEMQIENLKEELAYLKNHEEEMKEYSNQMG-GKVSVEVNSCPGPDQLKILTE  
MREQYEHADKNRREAEQWFKQTEELNQEVAINTEQLQSSKSEITELRRTIQGLEIELQ  
SQLSMKAGLEANLAETEGRYCAQLAQAMITSEIEQLAELRCDMERQNEQYRMLLDIKT  
RLEQEIATYRRLLEGG  
>Turtle\_k19  
EKSTMQNLNDRLASYLKVRLEEEANSELEIKIRDWYKKGPT----GPAHDYSL--YYK  
TIEDLRNKILSATIDNARIVLQIDNARLAADDFRKYETELALRMSVEADISGLRRVMDL  
LTLARADLEMQIENLKEELAYLKNHEEEMKALGGQVG-GQVSVEVNSAPGIDLTKILAD  
MRDQYEVMAEKNRKDAEWFNSKTEELNQEVAINTEQLQSSKSEITELRRTIQGLEIELQ  
SQLSMKAALQGLTADTENRYGAQLAQIHLIGNVEAQLTDLRADMERQNSDYQLMDIKT  
RLEQEIATYRRLLEGG  
>Turtle\_k9L  
EKITMQNLNDRLASYLKVRLEEEANSELEIKIRDWYKKGPT----ATLKDYSR--YYE  
EIEQLNNQIVNSVVEVNVKIVLNIDNTRMTIEDFKLYETELGLRQNVADINGLRPLLDQ  
LTLARADLEMQIENLKEELAYLKNHEEEMKALGGQVG-GDVMVEVNSCPGPDQLKILTE  
LRRYEYHIEENNRKEVEKYETKISEVNEHVHSSGRDIESSTKQVTELRREYQNVIEIQ  
SLLSTIQSLQSSLADTEGRYNIQLNQIQTIVSVEELASIRCEIDNQNEQYRLLGIKN  
QLEQEIATYRRLLEGG  
>Turtle\_HAS1  
EKLTMQNLNDRLASYLKVRLEEEANSELEIKIRDWYKKGPT----GVPKDYSC--YYK  
EIEDLQNIQVATIDNANLILQIDNARLAADDFRKFETEALRMSVEADINGLRRVLDL  
LTLARADLEMQIENLKEELAYLKNHEEEMCLRNQST-GDVSVEVNSCPGPDQLKILTE  
MRCQYEAIAQNRKEVEDWYACKIEEVNREVITSSQVEVSCNNQVRELRRQLALEIDLQ  
SHLSQRDNLEASLAETESRYNSHLQQLQIQITCVEQQLADLRTIEIQNHAYKILLDVKC  
RLEQEIHTYRCLLEGG  
>Turtle\_HAS2  
-----XXXKDYSC--YYK  
EIEDLQNIQVATIDNANLILQIDNARLAADDFRKFETEALRMSVEADINGLRRVLDL  
LTLARADLEMQIENLKEELAYLKNHEEEMCLRNQST-GDVSVEVNSCPGPDQLKILTE

MRCQYETMIAQNRKEVEDWYECKIEEVNREVITSSQEVESCSNVAELRRQLQCLEIDLQ  
SHLSQRDNLEASLAETESRYNSHLCQLQQQITCVEQQLADLRAEIESQNHKEYVLLDVKC  
RLEQEIHYRCLLEGG  
>Turtle\_K14L1  
EKETMQNLNDRLATYLDKVRLEEANSLEIKIKEWYKKGPF----SPDRDYSF--YYR  
TIEDLRKILAAATIDNANIVLQIDNARLAADDFRKFETELALRMSVEADINGLRRVLDE  
LTLARADLEMQIENLKEELAYLKKNHEEEMNILRSQLG-GEITVEMDAAPGVDLTKILAD  
MREQYESLAEKNRKEAEQWFFTKTEELNREVAMNTEQLQSGKSEITELRRTVQGLEIELQ  
SOLSMKAALLEGTLAETESRYGAQLAQLQGLITSVEEQLAELRCMDMERQNHKEYKILVDVKT  
RLEQEIATYRRLLEGE  
>Turtle\_K14L2  
EKETMQNLNDRLANYLKVRLEEANSLEIKIKEWYKKGPF----GPDRDYSF--YYR  
TIEDLRKILAAATVDNASLLQIDNARLAADDFRKFETEQALRMSVEADINGLRRVLDE  
LTLARADLEMQIENLKEELAYLKKNHEEEMNILRSQLG-GDITVEMDAAPGVDLTKILAD  
MREQYESLAEKNRKEAEQWFFTKTEELNREVAMNTEQLQSGKSEITELRRTVQGLEIELQ  
SOLSMKAALLEGSLAETEARYSQSLAQLQGLITSVEEQLAELRCMDMERQNHKEYKILVDVKT  
RLEQEIATYRRLLEGE  
>Turtle\_K117  
EKETMQNLNDRLAAYLETVRSLEEANGQLERQIREVYAKRAQ----AGCQDLSG--YFS  
TIAELRSQIQAASSTNAQLIQLIDNATLAADDFRKFSELAIRRGESDVAGLRKLVLDE  
VTLRSASLQELGSLQEEELAQKKNHGEAAALQGRIG-GSVSVEVDSAPGVDLTKILAE  
IRDQYEDVIERNHREAAWHKEQCETVAQEVATSAEAVQGARTKLTELRRVVQGLEVELQ  
SLYSMEALEGLTAEATRAGSGAELEQLRECVARKEAELAQRLTDTQRQAEBHQQLDLKLT  
RLEMEIATYRRLLEGD  
>Turtle\_K18  
EKETMQDLNERLASYLKVRLETDNQKLETQIREFMDKKGPF----SSRDWSH--YFD  
IIEDLRKQLDSAVDNARIVLQIDNARLAADDFRKFSELAIRQSVESDINGLRRVLDD  
TNMSRLQLEGEIESLKEELIFMKKNHQEVDLSQAQITNSGLTVEVDAAPQDLGKVMMAE  
IRAQYDNLAQKNMADLDQWNQMITQSTVEITQNTKEIEVARSSVSELRRYQTLIELE  
SLRNLKASLEANLQDVEQRYAMQMEHLNGQLLRAEELAQIRNDIQRQSEYQALLNIDK  
KLEAEIATYRRLLEGG  
>Lizard\_K24  
EKETMQNLNDRLANYLEKVRLEEANAELVKIRHWYKNGPGAP--GVVRDYTK--YHQ  
IIEDLRKIVNTTIDNANVVLQIDNARLAADDFRKFENELFLRQSVESDINGLRRVLDE  
LTMNSRDLQLEGEIESLKEELIFMKKNHQEVDLSQAQITNSGLTVEVDAAPQDLGKVMMAE  
IRAQYDNLAQKNMADLDQWNQMITQSTVEITQNTKEIEVARSSVSELRRYQTLIELE  
SLRNLKASLEANLQDVEQRYAMQMEHLNGQLLRAEELAQIRNDIQRQSEYQALLNIDK  
KLEAEIATYRRLLEGG  
>Lizard\_K24L  
EKETMQNLNDRLANYLEKVRLEEANAELVKIRHWYKNGPGAP--GVVRDYTK--YHQ  
IIEDLRKIVNTTIDNANVVLQIDNARLAADDFRKFENELFLRQSVESDINGLRRVLDE  
LTMNSRDLQLEGEIESLKEELIFMKKNHQEVDLSQAQITNSGLTVEVDAAPQDLGKVMMAE  
IRAQYDNLAQKNMADLDQWNQMITQSTVEITQNTKEIEVARSSVSELRRYQTLIELE  
SLRNLKASLEANLQDVEQRYAMQMEHLNGQLLRAEELAQIRNDIQRQSEYQALLNIDK  
KLEAEIATYRRLLEGG  
>Lizard\_K10L  
EKETMQNLNDRLASYLKVRLEEANAELVKIRHWYKNGPGAP--GVVRDYTK--YHQ  
IIEDLRKIVNTTIDNANVVLQIDNARLAADDFRKFENELFLRQSVESDINGLRRVLDE  
LTMNSRDLQLEGEIESLKEELIFMKKNHQEVDLSQAQITNSGLTVEVDAAPQDLGKVMMAE  
IRAQYDNLAQKNMADLDQWNQMITQSTVEITQNTKEIEVARSSVSELRRYQTLIELE  
SLRNLKASLEANLQDVEQRYAMQMEHLNGQLLRAEELAQIRNDIQRQSEYQALLNIDK  
KLEAEIATYRRLLEGG  
>Lizard\_K12  
EKETMQNLNDRLAAYLDRVHLSLEEANTELERKIREWYKNGPGTALGAGRDYSK--YYP  
VIEDLRNKIINATIDNANIVLQIDNARLAADDFRKFENEVALRQSVESDINGLRRVLDE  
LTLTRADLEMQIETLNEELAYLKKNHEEELIGFQSNAT-GQVSVEMDAAPGVDLTKLLNE  
MRAQYESIABEQHRKEAEAWFNEKSGELKREISTHSELOQYKSELTDLKRRTLQGLEIELQ  
SQLALKKSLDLETLAETEAQYCTQLAQMQLQIGNVESQLFQVRADMERQNAEYQNLMDIKT  
RLEMEIATYRRLLEGE  
>Lizard\_K23  
EKQTMQDLNDRLAAYLKVHLSLEEANTQLEGGCIREWHERRSQ----GMKHDFTD--YEQ  
NIVDMHERIEAGRVNAGIVLQIDNARLAADDFRKFSEKALRQSVQDDVENIRKELDN  
MTIITIDLEMEIEALREDHILKKEHEKDEMEASGAFKD-VNWNVKNVNTAPQEDLAKILAG  
IRADYEAIIQKNHQSLDAWFQKQIANDSSEKPNQEQSQNSQKEISELNRTLQGLEIELQ  
THLNKCSLENLDETRAYAFQLQSIQNLISQCEBELSEFRHDIKCQNNQYKVLGIGT  
RLETEISTYRRLDGGK  
>Lizard\_K36L1  
EKETMEFLNDRGNLYLVRVRCLEQENAELEAKIREWYEHENA----YVCTDFKP--FYC  
TIDELQQQCCTKADNAKLCLEIDNLMKASDDYCTKYDYELSLRQRDECDSSGLRKLVDN  
LTLCRADLEAQLESLEEMMCKKNHEEESALRSQLG-DRINVEVDAAPSCNLMKVLDE  
MRCQYADLEKNRREVEDWYCAQMEELNKEVISSGELOQCQTEIIEITRRCVQGLEIELQ  
AQQSMKSALETTLQETESRYCTQLAQLQCLISNVEAQLTEIRSDIERQNCYKALLDEKA  
RLDCEIAAYRNMLEGE  
>Lizard\_K36L2  
EKELMQCLNDRLANYLVRVRCLEQDNANLECKIREWHECQAP----YESTDFHS--HYK  
IIEELQHQLCAKTENARIVLEIDNARLAADDFRKFETELALRQCVESDIHGLRKLDE  
MTLRCRADLEAQLESLEEMMCKKNHEEESALRSQLG-ARVNVEMDAAPSCDNLKMLGE  
IRNQYECLEAKNRDVEWTFSSKMEELNQQVLSSEDELQNCQSEIIEELRHTMQALEIDL  
AQQNMKNALLECTLHETEARYSTQLAQLQCMISTIEGLOGDLRNDMERQSHKEYKILVDVKT  
RLEAEISTYRRLLEGE  
>Lizard\_K15  
EKVTMQNLNDRLATYLDKVRLEEANTELEVKIRDWHQKQAPK---SPSRDYSQ---YYK  
IIEDLRDKILGTTIDNSRVILEIDNARLAADDFRKFENELHLRQSVESDINGLRRVLDE  
LTMKSDELQIEGLKEDLAYLKNHEEELMKEFSTQTLT-GKVSVEVDAAPGVDLTKILAD  
MREQYEBLAEQNRKDAETWFFSKTEELNREVATNTEIQTSKSEISELRRRTVQGLEIELQ  
SOLSMKAGLESNLAETEGRYCAQLAQIQLNITGVVEQLAELRNDMERQNEQYKMLMDIKT  
RLEQEIATYRRLLEGE  
>Lizard\_K19  
EKITMQNLNDRLASYLKVRLEEANSLEIKIKEWYKKGPF----SPARDYSH--YYK  
TIEDLRDKILDATIDNANIVLQIDNARLAADDFRKFSEQALRMSVEADINGLRRVLDE  
LTLARSDELQIETLKEELAYLKKNHEEELGALSGHLG-GQVSVESDAPGVDLTKILAE  
MRDQYELLADKNRRDAEAWFTKTEELNREVAMNTEQLQSGKSEITELRRTVQGLEIELQ  
SOLSMKAALLEGTLADTENRYSAQLCQIQNLISNIEAQLVEVRSMDMERQNSDYKMLMDIKS  
RLEQEIATYRRLLEGG  
>Lizard\_K9L1  
EKSTMQNLNDRLAAYMNVKYLEDENAQLEVLIREWYKKGDPV---GTVRDYTH--HYQ  
EIDQLFNELVNETDDYKILNIDNTRMTAEDFKYQTEAGLRQNVESDINGLRPLMDQ  
LTLARSDELQIEFSAKEELITLKNHQEALRELOQSRGHGDNINVEVNAAPGVDLTKILAE  
LRAEYEAIDNRRREVEQWFEKMEEVRRQVSSGLEISSGNQVTDLRRQYQTLIELE  
SALSMSIQSLNLEDTERRYNLQQLQISMIQPVEGLASLRGIESQSQYQYQLLGIKT  
RLEQEIATYRRLLEGG  
>Lizard\_K9L2  
EKSTMQNLNDRFASYLNKVKLSLEAENQLETLIREWYKKGHT---SEPKDYSS---YYT  
EIDQLVNEELISASLESNKILLVDNARMAAEDFKLYETBYGLRQNVADLQGLRPLLDK

LTMDKSDLEMQYESLHEELVHLKKNHDEVMKSHHQSG-GDNNVEVNSSPGQDLTKTLND  
LRQYEEIIMKNRKEVQWFPAKMEARQQSPESQEGSGRHOITELTREYQTELEIQ  
TQLSTIQALQNNLNTEGGYNNLQQLASQIEPVEAELAGIKGEIQNQTEYQTLGKIK  
YLEQEIQYRQLLEGG  
>Lizard\_HAS1  
KKMTMQNLNDRLASYLNDVRYLEENAQLECKIRDWYDQSSP----NDPKDYN--YYE  
QTELDKQLICATVDCRKLILDIHNNKLTADDFRMRVEAERVFRQDKETDIDSLRQVLDQ  
LTLGRSDLEAQLESFQELCCCKKNHEEKVLLTKQAQ-GNINVEVNSNPSSELQKALDN  
LRRRYEAIIEKNVKEIETWYESMTEAINM----SKELKDDNNQVVDLKGQLQTESNLQ  
TQLSLRDLTQDSLAETQCLYNNSLAEIQNQICYMEQQLVELRVKTECLDQEYIRLSDAK  
LLEHEIETYCLLLEE  
>Lizard\_HAS2  
EKMTMQNLNDRLASYLKVRCLLEENQLECKIKEWYDRQGPV----NESKDYA--YYQ  
QIEDLNQIVCATVENSCLVLDIDNNRMTADDFRMYETELALCQNVADINGLRQVLDQ  
LTLGRSDLEAQLESFQELCCCKKNHEEKVLLTKQAQ-GDVSVEVNTCPGPDLLKVLDE  
LRQYENMIENNRREVEKWEYSKMEVNVLEVNCSSKEAEDCENNQIVDLKRQQLTEIDLQ  
AQLSLRDLTQDSLAETECRYNGHLAEIQNQISCVVEQQLGELRAEMEQNREYRELLDVK  
RLEQEIQTYRCLLEGG  
>Lizard\_HAS3  
EKVLMQNLNDRLAGNYIDKVRCLLEENQLECKIKWYDRQGPV----GEMKDSH--FYQ  
QIEELKQVVFVANLENKILKIDNNHMDLEDLRRKYETEYVIRENVEADVNLRPVLKE  
LTYKADLKAELNSLKEEICDLKKTHEKDLNCRKRRSH-GS-NKEVSIQPGDGLKQMLKE  
MRQYEAKEISNRKEVVQRYEDKLEKMNLMNVNNSQDIEDGNHVLDLKCKLPALEIDLQ  
AQYNMRDTLKVCLAEIECHFQTLGEMEQEISNMEHQLAELHLEMETQDQEYKGLVDVKK  
RLEQEIQTYSSLLKEG  
>Lizard\_HAS4  
GKMTMQNLNDRLASYLKVRCLLEENADLESIREFYAKQGPL----SEPKDYSH--YHQ  
QIEDLNQIVCATVENSCLVLDIDNNRMTADDFRMYETELALCQNVADINGLRQVLDQ  
LTLGRSDLEAQLESFQELCCCKKNHEEKVLLTKQAQ-GDVSVEVNTCPGPDLLKVLDE  
LRQYENMIENNRREVEKWEYSKMEVNVLEVNCSSKEAEDCENNQIVDLKRQQLTEIDLQ  
AQLSLRDLTQDSLAETECRYNGHLAEIQNQISCVVEQQLGELRAEMEQNREYRELLDVK  
RLEQEIQTYRCLLEGG  
>Lizard\_K141  
EKETMQNLNDRLASYLKVRCLLEENADLESIREFYAKQGPL----SPERDYS--YFR  
QIEELKQVVFVANLENKILKIDNNHMDLEDLRRKYETEYVIRENVEADVNLRPVLKE  
LTYKADLKAELNSLKEEICDLKKTHEKDLNCRKRRSH-GS-NKEVSIQPGDGLKQMLKE  
MRQYEAKEISNRKEVVQRYEDKLEKMNLMNVNNSQDIEDGNHVLDLKCKLPALEIDLQ  
AQYNMRDTLKVCLAEIECHFQTLGEMEQEISNMEHQLAELHLEMETQDQEYKGLVDVKK  
RLEQEIQTYSSLLKEG  
>Lizard\_K142  
EKETMQNLNDRLASYLKVRCLLEENADLESIREFYAKQGPL----GPORDYS--YFR  
QIEELKQVVFVANLENKILKIDNNHMDLEDLRRKYETEYVIRENVEADVNLRPVLKE  
LTYKADLKAELNSLKEEICDLKKTHEKDLNCRKRRSH-GS-NKEVSIQPGDGLKQMLKE  
MRQYEAKEISNRKEVVQRYEDKLEKMNLMNVNNSQDIEDGNHVLDLKCKLPALEIDLQ  
AQYNMRDTLKVCLAEIECHFQTLGEMEQEISNMEHQLAELHLEMETQDQEYKGLVDVKK  
RLEQEIQTYSSLLKEG  
>Lizard\_K17  
QKGTMQNLNDRLASYLGRVHSLAESNAQLEQNIREYYAKRAS----AGPDLG--YFN  
TLSELKAKIEQETLNNAGLLRIDNARLAADDFRMYETELALCQNVADINGLRQVLDQ  
LTLGRSDLEAQLESFQELCCCKKNHEEKVLLTKQAQ-GDVSVEVNTCPGPDLLKVLDE  
LRQYENMIENNRREVEKWEYSKMEVNVLEVNCSSKEAEDCENNQIVDLKRQQLTEIDLQ  
AQLSLRDLTQDSLAETECRYNGHLAEIQNQISCVVEQQLGELRAEMEQNREYRELLDVK  
RLEQEIQTYRCLLEGG  
>Lizard\_K18  
EKETMQNLNDRLASYLEKVRSLAEADNRKLEIQIREHLDDKGP----SARDWSH--YFE  
LIEDLRNQIFDQITDNRIVLQIDNARLAADDFRMYETELALCQNVADINGLRQVLDQ  
LTLGRSDLEAQLESFQELCCCKKNHEEKVLLTKQAQ-GDVSVEVNTCPGPDLLKVLDE  
LRQYENMIENNRREVEKWEYSKMEVNVLEVNCSSKEAEDCENNQIVDLKRQQLTEIDLQ  
AQLSLRDLTQDSLAETECRYNGHLAEIQNQISCVVEQQLGELRAEMEQNREYRELLDVK  
RLEQEIQTYRCLLEGG  
>Snake\_K24  
EKETMQNLNDRLANYLEKVRSLAEADNRKLEIQIREHLDDKGP----GVTRDYSK--YHR  
LIEDLRNQIFDQITDNRIVLQIDNARLAADDFRMYETELALCQNVADINGLRQVLDQ  
LTLGRSDLEAQLESFQELCCCKKNHEEKVLLTKQAQ-GDVSVEVNTCPGPDLLKVLDE  
LRQYENMIENNRREVEKWEYSKMEVNVLEVNCSSKEAEDCENNQIVDLKRQQLTEIDLQ  
AQLSLRDLTQDSLAETECRYNGHLAEIQNQISCVVEQQLGELRAEMEQNREYRELLDVK  
RLEQEIQTYRCLLEGG  
>Snake\_K24L  
EKQTMQNLNDRLANYLEKVRSLAEADNRKLEIQIREHLDDKGP----DTDRDYSK--YFK  
LIEDLRNQIFDQITDNRIVLQIDNARLAADDFRMYETELALCQNVADINGLRQVLDQ  
LTLGRSDLEAQLESFQELCCCKKNHEEKVLLTKQAQ-GDVSVEVNTCPGPDLLKVLDE  
LRQYENMIENNRREVEKWEYSKMEVNVLEVNCSSKEAEDCENNQIVDLKRQQLTEIDLQ  
AQLSLRDLTQDSLAETECRYNGHLAEIQNQISCVVEQQLGELRAEMEQNREYRELLDVK  
RLEQEIQTYRCLLEGG  
>Snake\_K10L1  
EKETMQNLNDRLASYLKVRSLAEADNRKLEIQIREHLDDKGP----INEGLYNSKYS  
SIEDLRNKIITASIRNAGTILQIDNARLAADDFRMYETELALCQNVADINGLRQVLDQ  
LTLGRSDLEAQLESFQELCCCKKNHEEKVLLTKQAQ-GDVSVEVNTCPGPDLLKVLDE  
LRQYENMIENNRREVEKWEYSKMEVNVLEVNCSSKEAEDCENNQIVDLKRQQLTEIDLQ  
AQLSLRDLTQDSLAETECRYNGHLAEIQNQISCVVEQQLGELRAEMEQNREYRELLDVK  
RLEQEIQTYRCLLEGG  
>Snake\_K10L2  
-XXXMQNLNDRLATYLGVALEEANSLELRIKWEYKFSAT----DTDRDYSK--YFK  
LIEDLRNQIFDQITDNRIVLQIDNARLAADDFRMYETELALCQNVADINGLRQVLDQ  
LTLGRSDLEAQLESFQELCCCKKNHEEKVLLTKQAQ-GDVSVEVNTCPGPDLLKVLDE  
LRQYENMIENNRREVEKWEYSKMEVNVLEVNCSSKEAEDCENNQIVDLKRQQLTEIDLQ  
AQLSLRDLTQDSLAETECRYNGHLAEIQNQISCVVEQQLGELRAEMEQNREYRELLDVK  
RLEQEIQTYRCLLEGG  
>Snake\_K20  
-XXXMQNLNDRLAAYLEKVRSLAEADNRKLEIQIREHLDDKGP----ITKQDYS--YFK  
VIRELQDKITEAREDNTRIIILQIDNSKLAADDFRMYETELALCQNVADINGLRQVLDQ  
LTLGRSDLEAQLESFQELCCCKKNHEEKVLLTKQAQ-GDVSVEVNTCPGPDLLKVLDE  
LRQYENMIENNRREVEKWEYSKMEVNVLEVNCSSKEAEDCENNQIVDLKRQQLTEIDLQ  
AQLSLRDLTQDSLAETECRYNGHLAEIQNQISCVVEQQLGELRAEMEQNREYRELLDVK  
RLEQEIQTYRCLLEGG  
>Snake\_K23  
EKRTMQNLNDRLASYLEKVRSLAEADNRKLEIQIREHLDDKGP----GTQDFKD--YEQ  
NISDMHDRITETGRVTNAGLVLQIDNARLAADDFRMYETELALCQNVADINGLRQVLDQ  
LTLGRSDLEAQLESFQELCCCKKNHEEKVLLTKQAQ-GDVSVEVNTCPGPDLLKVLDE  
LRQYENMIENNRREVEKWEYSKMEVNVLEVNCSSKEAEDCENNQIVDLKRQQLTEIDLQ  
AQLSLRDLTQDSLAETECRYNGHLAEIQNQISCVVEQQLGELRAEMEQNREYRELLDVK  
RLEQEIQTYRCLLEGG  
>Snake\_K15  
EKITMQNLNDRLANYLEKVRSLAEADNRKLEIQIREHLDDKGP----SQAQDYSN--YFK

I ISDLRNI G D C T C D N S K V V L E I D N A R L A A D D F R L K Y E N E L H L R Q G V E S D I N G L R R V M D E  
L T L F K S D M E M Q I E E K K E D L A Y L K K N H E E L M K E Y S T Q L T - G Q V N V E M D A A P G V D L T K I L A D  
M R E Q Y E Q M A E R N R R D A E A W F F T K T E E L N R E V A T H T E Q L O T S K T E I S E L R R T I Q S L E I E L Q  
S H L S M K A G L E S N L A D T E G R Y C A Q L A Q I Q N L I T G V E E Q L A E L R N D M E R Q N Q E Y R L M L M D I K T  
R L E Q E I A T Y R N L L E G Q  
>Snake\_K19  
E K V T M Q N L N D R L A N Y L D K V R A L E E A N T E L E V K I R E W Y Q K Q G P - - - - T A S R D F S L - - - Y F K  
T I E D L R E K I K D A T I G N N S I I L Q I D N A R L A A D D F R K F E T E Q A L R I S V E T D I N G L R R V L D E  
L T L S R A D L E M Q I E N L K E E L A Y L K K N H E E M S T L S G Q L G - G Q V S V E V D S A P G I D L T K I L A D  
M R D Q Y E L L A E K N R R D A E A W F T S K T E E L N K E V A V N T E Q L O T S K T E I T D L R R T L Q S L E I E L Q  
S Q L S M K S A L E G T L A D T E A R Y G N R L C Q I Q G L I S N I E A Q L V E V R S D M E R Q N N D Y K M L M D I K T  
R L E Q E I E T Y R Q L L D G Q  
>Snake\_K9L  
E K A T M Q N L N D R L A N Y L D Q V K R L E D E N C Q L E I W I K E W Y Q K H G D I - - - - G P D K D Y S C - - - Y Y Q  
E I D Q L Y N E L I A E T D D Y N K I I L N I D N T R M T A E D F L K Y N T E A G L C K N V E A D I N G L R P L L D Q  
L T L A K S D L E M Q F E S L R E E L I C L K K N H E E T L R G L R Q R G H G D V S V E V N A A P G Q D L K Q R L D Q  
L R C E Y E N I I E Q N R K E V E V W Y T K M E E V R Q V S T S D Q E I T S S N H Q L S E L R R E Y Q T L E I E L Q  
S Q I S M I Q S L Q T N L E D T E R R Y N M Q L Q Q I Q A M I E P V E G E L A S I R C E I E S Q N Q E Y Q L L L G I K T  
R L E Q E I C Q Y R R L L E E G  
>Snake\_HAS1  
E K M T M Q N L N D R L A C Y L E K V R N L E E N A D L E A R I R Q W Y D R Q G P P - - - - S E L K D Y S S - - - Y Y Q  
Q I E E L K N Q I V C A T V D N S K L I L D I D N N R M T A D D F R L K Y E T E L A L C Q N V E A D I N G L R Q V L D Q  
L T L C R S D L E A Q L E S L R E E L C C I K K N H E E I K S L K S Q T C - G D V S V E V N S S P G P D L K K V L E E  
M R C Q Y E T M I E N N R K E V E Q W Y E R K M E V N Q E V C I S S K E V E D C N N Q V V D L K R Q L Q T L E I D L Q  
A Q L C L R E S L Q S L G E T E C R Y N T H L A E I Q N Q I S L V E Q Q L A E L R A E M E C Q N R E Y R E L L D V K C  
R L E Q E I Q T Y R S L L E E G  
>Snake\_HAS2  
G K M T M Q N L N D R L A S Y L D K V R C L E E N A E L E C R I R E F Y A K Q G P L - - - - S E P K D Y S H - - - Y H Q  
Q I E D L K N Q L I C A S V E N N K L L L C I D N S K L T A D D F R S K Y E T E C C L R Q N V E A D I N G L H Q I L D Q  
L T A C R S D L D I Q C E N L Q D E L C C L R K N H E E V A C L K N Q A S - G D V S V E V N A C P G P D L K K I L E E  
M R C K Y E S M I E G N R K E V E T W Y E S K I E E V N R D V C T S S Q E I E E S N N K V T E L R R Q L A Q A L E I E Y D  
A Q C S L R D T L E G S L G E T E L R Y N S H L A E L Q E R I S C L E Q Q L A E L R S E M E C Q N H D Y T E L L D V K S  
R L E K E I A T Y R G L L E G G  
>Snake\_K14L1  
E K Q T M Q N L N D R L A N Y L D K V R A L E E A N T S L E I K E W Y Q K Q G P - - - - A P D R D Y S S - - - Y F R  
K I E D L K N Q I L A A S I D N A S V L L Q I D N A R L A A D D F R K F E T E Q A L R L N V E S D I N G L R V L D E  
L T L S R S D L E M Q I E N L K E E L A Y L K K N H E E M N A F R K Q V S - G E I T V E M D A T P G V D L T K I L T D  
M R E Q Y E T L A E K N R R D A E Q W F F T K T E D L N R E V A T N T V Q L O T S K T E I V L R R T I Q S L E I D L Q  
A Q L S M K S A L E G T L V E T E T R Y G T Q L G Q I Q G M I T N V E E L A A L R C D M E R Q N H E Y K I L L D V K T  
R L E Q E I A T Y R R L L E G E  
>Snake\_K14L2  
E K E T M Q N L N D R L A A Y L D K V R A L E E S N A S L E V R I K E W Y Q K Q A P - - - - G P D R D Y S Y - - - Y F R  
I I E D L R S K I V S A T V E N A D V L L Q I D N A K L T A D D F R K N F E I E Q A L R M S I E S D I N G L R N V L D D  
L T S T R I H L E K N L E L L T E E L L H L K K N H K E M G L L Q S Q M G - G E I T V E M D A A P G V D L T K I L A D  
M R E Q Y E N L A E K N R R D A E Q W F F S K T E E L N R E V A I N T E Q L Q S G Q S E V I E L R R T L Q G L E I D L Q  
A Q L S T K A A L E G T L A D I E S R Y S L Q L A H I Q G L I I N V E E L A T L R C D M E R Q N H E Y K I L L D V K T  
R L E Q E I A M Y R H L L E G E  
>Snake\_K117  
E K G T M K N L N D R L A A Y L D K V L S L E K S N M Q L E Q N I Q E F Y T K Q T S - - - - T G T H D M S A - - - Y F N  
A M I Q M K S E I Q K E T L K N A G L L L Q I D N A R L A A D D F R V K L E S E V A M R L S L E G D L G G L R K A L E E  
L N A S R A S L Q V A D N L Q E E L A C L K R N H K E V A S L Q C H L G - G T V N V E V D S M P G T D L Q V L G E  
V R D Q Y E G V M E K N R Q E A E A L H Q S Q C D A L N Q E V S V T E A L Q S A Q M K V E L K R L A Q A L E I E L Q  
S L W S M K E A L E G T L A E V E S H Y G L E S Q L Q N L V A A R E A E L L Q L K S D A Q N Q A E D Y K R L M D I K N  
R L E Q E I A T Y R C L L E G S  
>Snake\_K18  
E K E T M Q N L N D R L A N Y L D K V R S L E A D N R K L E I Q I R E Y M E K K G P - - - - S A R D W G R - - - H F Q  
I I D G L K N Q I Y D Q S V D N A R V V L Q I D N A R L A A D D F R V K Y E A E L A I R Q S V E S D I F G L R K V I D D  
T N M S R L Q L E S E I E A L K E E L I F M K N H Q D E V T T L Q A Q I A N S G L T V E V D A P K S Q D L A K I M A E  
I R A Q Y D A L A Q K N L E D L D K Y W S Q Q I E S E S T V I N Q N S K E I E T A R V T M T D L R R T V T Q L E I E L E  
S M R N V R A S L E G N L L E V E S R Y A M Q I E H L N G I L R T E A E L S Q L R N D V Q R Q A D D Y Q A L L N I K D  
K L E A E I A T Y R H L L E G G  
>Human\_K9  
E K S T M Q E L N S R L A S Y L D K V Q A L E E A N D L E N K I Q D W Y D K K G P A - - - - A I Q K N Y S P - - - Y Y N  
T I D D L K D Q I V D L T V G N N K T L L D I D N T R M T L D D F R I K F E M E Q N L R Q G V D A D I N G L R Q V L D N  
L T M E K S D L E M Q Y E T L Q E E L M A L K K N H E E M S Q L T G Q N S - G D V N V E I N V A P G K D L T K T L N D  
M R Q Y E Q L I A K N R K D I E N Q Y E T Q I T Q I E H E V S S G Q E V Q S S A K E V T Q L R H G V Q L E I E L Q  
S Q L S K K A A L E K S L E D T K N R Y C G L Q M I Q E I S N L E A Q I T D V R Q E I C Q N Q E Y S L L L S I K M  
R L E K E I E T Y H N L L E G G  
>Human\_K10  
E K V T M Q N L N D R L A S Y L D K V R A L E E S N Y E L E G K I K E W Y E K H G N S H Q - - - - G E P R D Y S K - - - Y Y K  
T I D D L K N Q I L N L T D N A N I L L Q I D N A R L A A D D F R L K Y E N E V A L R Q S V E A D I N G L R R V L D E  
L T L T R A D L E M Q I E S L N E E L A Y M K K N H E E M K D L R N V S T - G D V N V E M N A A P G V D L T Q L L N N  
M R S Q Y E Q L A E Q N R K D A E A W F I E K S G E L R K E I S T N T E Q L Q S S K E V T D L R R A F Q N L E I E L Q  
S Q L A L K Q S L E A S L A E T E G R Y C V Q L S Q I Q A Q I S A L E E Q L Q I R A E T E C Q N T E Y Q Q L L D I K I  
R L E N E I Q T Y R S L L E G E  
>Human\_K12  
E K E T M Q N L N D R L A S Y L D K V R A L E E A N T E L E N K I R E W Y E T R G T G T A D - A S Q S D Y S K - - - Y Y P  
L I E D L R D K I L T A T I E N N R V I L E I D N A R L A A D D F R M K Y E N E L A L R Q S V E A D I N G L R R V L D E  
L T L T R D L E M Q I E S L N E E L A Y M K K N H E E M K E F S N Q V V - G Q V N V E M D A A P G V D L T R L L N D  
M R A Q Y E T I A E Q N R K D A E A W F I E K S G E L R K E I S T N T E Q L Q S S K E V T D L R R A F Q N L E I E L Q  
S Q L A M K S L E D S L A E G D Y C A Q L S Q V Q L I S N L E A Q L L Q V R A D A E R Q N V D H Q R L L N V K A  
R L E L E I E T Y R R L L D G E  
>Human\_K13  
E K I T M Q N L N D R L A S Y L E K V R A L E E A N A D L E V K I R D W H L K Q S P A - - - - S P E R D Y S P - - - Y Y K  
T I E E L R D K I L T A T I E N N R V I L E I D N A R L A A D D F R L K Y E N E L A L R Q S V E A D I N G L R R V L D E  
L T L S K T D L E M Q I E S L N E E L A Y M K K N H E E M K E F S N Q V V - G Q V N V E M D A A P G V D L T R L L N D  
M R E Q Y E A M A E R N R R D A E E W F H A K S A E L N K E V S T N T A M I Q T S K T E I T E L R R T L Q G L E I E L Q  
S Q L S M K A G L E N T V A E T E C R Y A L Q L Q Q I Q G L I S S I E A Q L S E L R S E M E C Q N Q E Y K M L L D I K T  
R L E Q E I A T Y R S L L E G Q  
>Human\_K14  
E K V T M Q N L N D R L A S Y L D K V R A L E E A N A D L E V K I R D W Y Q R Q P - - - - A E I K D Y S P - - - Y F K  
T I E D L R N K I L T A T V D N A N V L L Q I D N A R L A A D D F R T K Y E T E L N L R M S V E A D I N G L R R V L D E  
L T L A R A D L E M Q I E S L K E E L A Y L K K N H E E M N A L R G Q V G - G D V N V E M D A A P G V D L S R I L N E  
M R D Q Y E K M A E K N R K D A E E W F F T K T E E L N R E V A T N S L V Q S K S E I S E L R R T M Q N L E I E L Q  
S Q L S M K A S L E N S L E E T K G R Y C M Q L A Q I Q E M I G S V E E Q L A Q L R C E M E Q N Q E Y K I L L D V K T  
R L E Q E I A T Y R R L L E G E  
>Human\_K15  
E K I T M Q N L N D R L A S Y L D K V R A L E E A N A D L E V K I H D W Y Q K Q T P T - - - - S P E C D Y S Q - - - Y F K  
T I E E L R D K I M A T T I D N S R V I L E I D N A R L A A D D F R L K Y E N E L A L R Q G V E A D I N G L R R V L D E  
L T L A R T D L E M Q I E G L N E E L A Y L K K N H E E M K E F S S Q L A - G Q V N V E M D A A P G V D L T R V L A E  
M R E Q Y E A M A E K N R R D V E A W F F S K T E E L N K E V A N T E M I Q T S K T E I T D L R R T M Q B L E I E L Q  
S Q L S M K A G L E N S L A E T E C R Y A T Q L Q Q I Q G L I G G L E A Q L S E L R C E M E A Q N Q E Y K M L L D I K T  
R L E Q E I A T Y R S L L E G Q  
>Human\_K16

EKVTMQLNDRSLASYLDKVRLEAEANADLEVKIRDWYQRP-----SEIKDYSP--YFK  
TIEDLRNKIIAATIENAQPILQIDNARLAADDFRTKFEHELALRQTVEADVNGLRRLVDE  
LTLARADLEMQIEGLKEELAYLRKNHEEMLALRGQVG-GDINVEMDAAPGVDLSRLINE  
MRDQYEQMAEKNRDAETWFLSKTEELNKEVASNSSELVQSSRSEVTELRRLVQGLEIELQ  
SLSMKASLENSLEETKGRYCMQLSQIQGLIGSVEEQLAQLRCMEQSQSQBYQIILLDVKT  
RLEQEIATYRRLLEGE  
>Human\_K17  
EKATMQLNDRSLASYLDKVRLEAEANTELEVKIRDWYQRP-----GPARDYSQ--YYR  
TIEELQNKILATVDNANILLQIDNARLAADDFRTKFEHELALRQVTEADVINGLRRLVDE  
LTLARADLEMQIEGLKEELAYLRKNHEEMLALRGQVG-GEINVEMDAAPGVDLSRLINE  
MRDQYEQMAEKNRDAETWFLSKTEELNKEVASNSSELVQSSRSEVTELRRLVQGLEIELQ  
SLSMKASLENSLEETENRYCVQLSQIQGLIGSVEEQLAQLRCMEQSQSQBYQIILLDVKT  
RLEQEIATYRRLLEGE  
>Human\_K18  
EKETMQLNDRSLASYLDKVRLEAEANTELEVKIREHLEKKG-----QVRDWSH--YFK  
TIEDLRAQIFANTVDNARIVLQIDNARLAADDFRVKYTELAMRQSVENDIHGLRKKVIDD  
TNITRQLQLETEIEALKEELLPMKKNHEEEMVGLQAQIASSGLTVEVDAPKSDLAKIMAD  
IRAQYDELARKNREELDKYWSQQIEESTTAVTQSAEVGAETTLTELRRVQGLEIELDLD  
SMRNLKASLENSLEVEARYALQMEQLNGILLHLESELQTRAEGRQQAQYEAALLNLIK  
KLEAEIATYRRLLEGE  
>Human\_K19  
EKLTMQLNDRSLASYLDKVRLEAEANGELEVKIRDWYQKQP-----GPSRDYSH--YYT  
TIQDLRDKILGATIENSRIVLQIDNARLAADDFRTKFEHELALRMSVEADVINGLRRLVDE  
LTLARADLEMQIEGLKEELAYLRKNHEEEMVGLQAQIASSGLTVEVDAPKSDLAKIMAD  
MRSQYEVMAEQNRKDAEAWFTRSTEELNREVAHTEQLQMSRSEVTELRRLVQGLEIELQ  
SLSMKAALEDTLAETEARFGAQLAHLQALISGIEAQLGVDVADSERQNEQYQRLMDIKS  
RLEQEIATYRRLLEGE  
>Human\_K20  
EKMAMQLNDRSLASYLEKVRTLEQSNKLEVKIQWYETNAP-----RAGRDYSA--YYR  
QIEELRSQIKDAQLNARCVLQIDNAKLAADDFRLKYETERGIRLTVEADLQGLNKVFDL  
LTLHKTDLQIEIEELNKLALKKEHQEVDGLHKLHG-NVNVEMDAAPGLNGLVMINE  
MRQYEVMAEQNLQEAKEQFERQTAVLQQQVTVNTEELKGTVEQLTELRRVQGLEIELQ  
SHLSMKESLEHTLEETKARYSQLANLQSLSSLEAQLMQIRSNMERQNEVHILLDIKT  
RLEQEIATYRRLLEGE  
>Human\_K23  
GKATMQLNDRSLASYLEKVRLEAEANMKLESILKWHQQRDP-----GSKDYSP--YEE  
NITHLQEQIVDGKMTNAQIILLIDNARMAVDDFNLYENEHSHKDDLEIEVEGLRRLTLDN  
LTIIVTDLQEVGEMRKLILMKKHEEQEMKHHVPSD-FNVNVEMDAAPGLNGLVMINE  
MRQYEVMAEQNLQEAKEQFERQTAVLQQQVTVNTEELKGTVEQLTELRRVQGLEIELQ  
TQYSTKSALENMSETQSRYSCKLQDMQEIISHYEEELTQLRHELERQNEVQLLGIKT  
HLEKEITTYRRLLEGE  
>Human\_K24  
EKQTMQLNDRSLASYLDKVRLEAEANTDLENKIKEWYDKYGPQSGDGGSGRDYSK--YYS  
TIEDLRNKIIAATVENAGIILHIDNARLAADDFRLKYENELCLRQSVADINGLRKLVDL  
LTMTRSDLEMQIESFTEELAYLRKNHEEEMKMQGSSG-GEVTVEMNAAPGVDLTKLLND  
MRAQYELAEQNRREAEERFNKQASLQAQISTDAGAATSAKNETELKRTLQALEIELQ  
SLSMKSSLEGTADTEAGYVQLSEIQTQISALEEIEICQIWGETKQNAEYKQLLDIKT  
RLEVEIETTYRRLLEGE  
>Human\_K25  
EKVTMQLNDRSLASYLDKVRLEAEANADLEQIKGWYKFGPGSCR-GLDHDYSR--YFP  
TIEDLRNKIIAATSTSNANAVLQIDNARLAADDFRLKYENELALHQSVEADVINGLRRLVDE  
LTLCTDLEIQYETLSEEMTYLKNHKEEMQVLCQAAG-GNVNVEMNAAPGVDLTVLLNN  
MRAEYALAEQNRDAEAWFNESASLQQQISDVGATTARNELTEMKRTLQTLQLEIELQ  
SLLATKHSLECSLTETESNYCAQLAQIQAQIGALEEQLHQVRETETEGQKLEYEQLLDIK  
HLEKEIETYCLLIGD  
>Human\_K26  
EKVTMQLNDRSLASYLDKVRLEAEANADLEQIKGWYKCEPGSSR-EHDHDYSR--YFS  
VIEDLKRQIISATCNASIVLQNDNARLAADDFRLKYENELALHQSVEADVINGLRRLVDE  
LTLCTDLEIQYETLSEEMTYLKNHKEEMQVLCQAAG-GNVNVEMNAAPGVDLTVLLNN  
MRAEYALAEQNRDAEAWFNESASLQQQISDVGATTARNELTEMKRTLQTLQLEIELQ  
SLMAVKSHECSLAETEGNYCNLQQIQDQIGVMEELQIQIRTEGQKLEYEQLLDIK  
FLEKEIDYCNLLDGE  
>Human\_K27  
EKVTMQLNDRSLASYLENVRALEAEANADLEQIKGWYKFGPGSCR-GLDHDYSR--YFP  
TIEDLRNKIIAATSTSNANAVLQIDNARLAADDFRLKYENELALHQSVEADVINGLRRLVDE  
LTLCTDLEIQYETLSEEMTYLKNHKEEMKALQCAAG-GNVNVEMNAAPGVDLTVLLNN  
MRAEYALAEQNRDAEAWFNESASLQQQISDVGATTARNELTEMKRTLQTLQLEIELQ  
SLLATKHSLECSLTETESNYCAQLAQIQAQIGALEEQLHQVRETETEGQKLEYEQLLDIK  
HLEKEIETYCLLIDGE  
>Human\_K28  
EKVTMQLNDRSLASYLDKVRLEAEANADLEQIKGWYKCEPGSSR-EHDHDYSR--YHL  
TIEDLRNKIIAATSTSNANAVLQIDNARLAADDFRLKYENELALHQSVEADVINGLRRLVDE  
LTLCTDLEIQYETLSEEMTYLKNHKEEMKALQCAAG-GNVNVEMNAAPGVDLTVLLNN  
MRAEYALAEQNRDAEAWFNESASLQQQISDVGATTARNELTEMKRTLQTLQLEIELQ  
SLMATKHSLECSLTETESNYCAQLAQIQAQIGALEEQLHQVRETETEGQKLEYEQLLDIK  
HLEKEIETYCLLIDGE  
>Human\_K31  
EKETMQLNDRSLASYLEKVRQLEERDNELENIIRERSQQQEP-----LLCPSYQS--YFK  
TIEELQKILCTKSENARLVVQIDNAKLAADDFRTKYQTELSRLQVLESDINGLRRLIDE  
LTLCKSDLEAQVESLKEELCLKSNHEEQVNTLRCQLG-DRLNVEVDAAPTVDLNRVINE  
TRSQYEAALVEVNRREVEQWFTTQTEELNKQVSSSEQLQSQYQAEIIELRRTVNALEIELQ  
AQHNLKRSLENTLSEARYSSQLSQVQLITNVESQLAEIRSDLERQNEVQVLLDVRA  
RLECEINTYRSLLESE  
>Human\_K32  
EKETMQLNDRSLASYLTVRQLEQENAELESRIQEAHSQVL-----TMTPDYQS--HFR  
TIEELQKILCTKAENARVNIIDNAKLAADDFRTKYQTELSRLQVLESDINGLRRLIDE  
LTLCKADLEAQVESLKEELCLKSNHEEQVNTLRCQLG-DRLNVEVDAAPTVDLNRVINE  
MRQYEAALVEVNRREVEQWFTTQTEELNKQVSSSEQLQSQYQAEIIELRRTVNALEIELQ  
AQHNLKRSLENTLSEARYSSQLSQVQLITNVESQLAEIRSDLERQNEVQVLLDVRA  
RLECEINTYRSLLESE  
>Human\_K33a  
EKETMQLNDRSLASYLEKVRQLEERDNELENIIRERSQQQEP-----LVCASYQS--YFK  
TIEELQKILCTKSENARLVVQIDNAKLAADDFRTKYQTELSRLQVLESDINGLRRLIDE  
LTLCKADLEAQVESLKEELCLKSNHEEQVNTLRCQLG-DRLNVEVDAAPTVDLNRVINE  
TRSQYEAALVEVNRREVEQWFTTQTEELNKQVSSSEQLQSQYQAEIIELRRTVNALEIELQ  
AQHNLKRSLENTLSEARYSSQLSQVQLITNVESQLAEIRSDLERQNEVQVLLDVRA  
RLECEINTYRSLLESE  
>Human\_K33b  
EKETMQLNDRSLASYLEKVRQLEERDNELENIIRERSQQQEP-----LLCPSYQS--YFK  
TIEELQKILCTKSENARLVVQIDNAKLAADDFRTKYQTELSRLQVLESDINGLRRLIDE  
LTLCKADLEAQVESLKEELCLKSNHEEQVNTLRCQLG-DRLNVEVDAAPTVDLNRVINE  
TRNQYEAALVEVNRREVEQWFTTQTEELNKQVSSSEQLQSQYQAEIIELRRTVNALEIELQ  
AQHNLKRSLENTLSEARYSSQLSQVQLITNVESQLAEIRSDLERQNEVQVLLDVRA  
RLECEINTYRSLLESE



```

>Human_K34
EKETMQFLNDRLASYLEKVRQLERDNAELEKLIQERSQQQEP-----LLCPYSQS--YFK
TIEELQKILCAKAENARLVVNIIDNAKLASDDFRSKYQTEQSLRLLVESDINSIRRLIDE
LTLCKSDLESQVESLREELICLKNHHEEVNTRLSQLG-DRLNVEVDAPTVDLNQVLNE
TRSQYEAALVENRREVEQWFAQTQTEELNKQVVSSSEQLQSCQAEIIELRRTVNALEIELQ
AQHNLDRSLENTLSEAHYSSQLSQVSLITNVESQLAEIRCDLERQNEQYQVLLDVRA
RLECEINTYRSLLESE
>Human_K35
EKETMQSLNDRLAGYLEKVRQLEQENASLESRIREWCEQQVP-----YMCPTYQS--YFR
TIEELQKILCSKAENARLVVEIDNAKLAAADFRKYEVEVSLRQLVESDINGLRRILDD
LTLCKADLEAQVESLKEELCLKNHHEEVNTRLSQLG-DRLNVEVDAPPVDLNKILDE
MRCQYETLVENNRDAEDWLDTQSEELNQVVSSSEQLQSCQAEIIELRRTVNALEIELQ
AQHSMRDALESTLAEATEARYSSQLAQMQCMITNVEAQLAEIRADLERQNEQYQVLLDVRA
RLECEINTYRGLLESE
>Human_K36
EKETMQFLNDRLANYLEKVRQLERENAELESRIQEWYEFQIP-----YICPDYQS--YFK
TIEDFQKILLTKSENARLVQIDNAKLAAADFRKYEVELSLRQLVEADINGLRRILDE
LTLCKADLEAQVESLKEELMCLKNHHEEVNTRLSQLG-DRLNVEVDAPPVDLNKILDE
MRCQYEAALVENNRDVEAWFNTQTEELNQVVSSSEQLQSCQAEIIELRRTVNALEIELQ
AQHSMRNSLESTLAEATEARYSSQLAQMQCLISNVEAQLSEIRCDLERQNEQYQVLLDVKA
RLEGEIATYRHLLLEGE
>Human_K37
EKETMKFLNDRLANYLEKVRQLEQENAELETTLLERSKCHES-----TVCPDYQS--YFR
TIEELQKILCSKAENARLVQIDNAKLAAADFRKILESERSLHQLVEADKCGTKQLLDD
ATLAKADLEAQVESLKEEQLSLKSNHEQEVKILRSQLG-EKFRIELDIETIDLNRLVGE
MRAQYEAAMVETNHQDVEQWFAQSEGISLQAMSCSEELQCCQSEILELRCTVNALEVERQ
AQHTLKDCLQNSLCEAEDRYGTELAQMQLISNLEEQLSEIRADLERQNEQYQVLLDVKA
RLENEIATYRNLLLESE
>Human_K38
EKETMQFLNDRLANYLEKVRQLEQENAELEATLLERSKCHES-----TVCPDYQS--YFH
TIEELQKILCSKAENARLVQIDNAKLAAADFRKILESERSLHQLVEADKCGTKQLLDD
ATLAKADLEAQVESLKEEQLSLKSNHEQEVKILRSQLG-EKLRIELDIETIDLNRLVGE
MRAQYEAAMLETNRQDVEQWFAQSEGISLQDMSCSEELQCCQSEILELRCTVNALEVERQ
AQHTLKDCLQNSLCEAEDRFQTELAQMQLISNVEEQLSEIRADLERQNEQYQVLLDVKT
RLENEIATYRNLLLESE
>Human_K39
EKETMQILNERLANYLQKVRMLERENAELESKIQEESENKELP-----VLCPTYLS--YYT
TIEELQKILCTKAENSRVLSQIDNTKLTADDLRAKYEAEVSLRQLVESDANGLKQILNV
LTLCKADLEAQVQSLKEELCLKNHHEEINSLQQLG-ERLDIEVTAAPSADLNQVLQE
MRCQYEPIMETNRKDVEQWFAQSEGISLQVVSSSQQQCCQKEIIELRRTVNTLEVELQ
AQHRMRDSQECILTEARYTALLTQIQSLIDNLEAQLAEIRCALERQNEQYIILLDVKS
RLECEITTYRSLEESS
>Human_K40
EKETMQFLNDRLASYLEKVRSLLETNAELESRIQEQCQDIP-----MVCPTYQR--YFN
TIEDLQKILCTKAENSRVAVLDNCKLATDDFKSKYESELSRQLLEADISLHGILEE
LTLCKSDLEAHVESLKEELCLKNHHEEVNLLREQLG-DRLSVELDAPTDLNRLVDE
MRCQCEYTLVANNRRAEAWLAVQTEELNQVSSAEQLQCCQMEILELRKTASALEIELQ
AQQSLTESLECTVAETEAQYSSQLAQIQCLIDNLENLAELAEIRCDLERQNEQYQVLLDVKA
RLEGEINTYWGLLDSE

```

**Suppl. Fig. S12. Amino acid sequence alignment of the intermediate filament domains of type I keratins used for the phylogenetic analysis shown in Figure 3. The multiple sequence alignment is shown in fasta\_aln format.**

>Chicken\_K80  
EKEDIKLLNNQFVTLIEKVQCLEQONKILTRWNFLKQDQNSH--SESDVKAIYDQYMSK  
MNQEMQALNYEQENLESELTEVFLTMDNFRSKYEDEIRLCSGMEYTFMELKKDLASTLH  
RTELEVKLSGLQELMDLKKTYEQELEELLETTI--KDISVVLGIDNTCKL-DLSRIVEEV  
RAQYEAALALRSWEAEALTRKRLNEGNTQSATYGGHLLDSRREIADLNIIQIKLRSCIVS  
QKSQCPLYLEENIKEAGEHGEMALKDAKAKLVKLEALQKSKEDMAHLVKEVQELMNIKLA  
LDLEILTTRKLVVEGE  
>Chicken\_K7  
EKEQIKTLNRRFASFDKVRFLQONKMLETKWSLLQDQKT---TRSNIVPMFEAYITN  
LRRQLDGLLNDKGRLEGEELRNMDLVEDFKAKYEDEINKRTTAENEFVVLKDKVDAAAYMN  
KVELEAKVDALTEINFLRSLYEAELELQAQI--SDTSVVLMSMDNSRNL-DLDSIIAEV  
KAQYEDIANRSRAEAEAWYQSKFEALQVTAGKHGDDLRLNKTNEITEINRVIQRLQGEIEN  
AKAQRAKMEAAIAEAEEREGELAVKDARAKLELEALQKAKQDMARQLREYQELMNVKLA  
LDIEIATYRKLLEGE  
>Chicken\_K84L  
EKEQIKTLNRRFASFDKVRFLQONKMLETKWSLLQDQKH---GRNTIVPMFEACIGN  
LKKQLEALGCRNARLETQLKAVQEALETNKKIYEDERSRRSSTEKELIALKKDVECFPLN  
KAELEAKVGRMEGEFGFLRVLYEESQQLRAHI--SDTAVVVQMDNSWDP-NLDGIVANV  
KAHYEDTACRSRAETAWCKGKFKELQVTAGRNADSLQEKKREAEALARMVVKLSGVEVS  
AKEQCCKLETAVADAEQRKEMSIKDAKSKLTELAEALQKAKQDLARQLWEPQELMNIKLA  
LDVEITTYKLLLEGE  
>Chicken\_K5L3  
EKEQIQTLNRRFASFDKVRFLQONKMLETKWALLQEQGHKT--VRNNIEPLFEAYINN  
LRRQLSSLLADKENI GGELSKVQSLAEDFKSKYEDEINKRTAENEFVILKKEVDSTYMT  
KTELQARLDALLEEIDFLRALYEAEELSQQLSQTII--ADTSVILTMDDNNSRL-DMDSIIAEV  
KAQYEDIAKRSRAEAEAWYQSRYEELQATAGRHGDDLRLSTKQEI SELNRHVQRLRAEIDS  
VKKQCASLQTAIADAEQRGELALDKDARDKLAELQALQKAKADLARQLREYQELMNVKLA  
LDIEIATYRKLLEGE  
>Chicken\_K5L2  
EKEQIKTLNRRFASFDKVRFLQONKMLETKWALLQEQGMKT--VRNNIEPLFETYINN  
LRMQLSLLSDKGRLEGEELVNTQYLVEDFKKYEDEINRRTAENEFVTLKDKVDASAYMN  
KVELQAKADALTEEINFLRALYEAEELSQMQTQI--SDTSVVLTMDDNNSRL-DLDSIIAEV  
KAQYEDIANRSRAEAEAWYQTYEELQATAGRHGDDLRLSTKQEI SELNRHVQRLRAEIDS  
VKKQCANLQAAIAEAEERGERIALKDAKAKLAELQALQKAKADLARQLREYQELMNVKLA  
LDIEIATYRKLLEGE  
>Chicken\_K5L1  
EREQIKTLNRRFASFDKVRFLQONKMLETKWALLQEQGHTV--TRKSLEPLFETYINN  
LRRQLDGLMGRERLDSLELRSMQDMVEDFKKYEDEINRRTAENEFVVLKDKVDGAYMN  
KVELQAKADGLADEINFLRALYEAEELSQMQQVQI--SDTSVVLMSMDNSRNL-DLDSIIAEV  
KAQYEDIANRSRAEAEAWYQNYEELQVTSAGRHGDDLRLNKTNEISEINRVIQRLRNEIES  
VKKQCANLQAAIAEAEERGERIALKDAKAKLAELQALQKAKADLARQLREYQELMNVKLA  
LDIEIATYRKLLEGE  
>Chicken\_HBS1  
EKEQIKTLNRRFASFDKVRFLQONKMLETKWALLQEQVLPK--SRNLEPVFENICN  
LRKQLECVLGERERLENERCLRDVQYKCKYEDEINKRTAENEFVVLKDKVDCLYLT  
KEELEVRVGLLRQQLLEFLKCIYAEERAQMDQQL--CDTSVIVQMDNSRDL-DMEGIKSV  
ECCYEITAQKSKAEVAFYQTRLEELHSRGGKCDLRLNNSQSEIAELNRMIIQKQCESDN  
VKKQIAALQTAICDABQRGDALKDARQKLVLDLQALQKAKKMACLLRDYQELNIVKLA  
LDIEIATYRKLLEGE  
>Chicken\_HBS2  
EKEQIKTLNRRFASFDKVRFLQONKMLETKWALLQEQVLPK--KGKNELEPVFENICD  
LRKRLDCLLCEKQKLENECATSQVVEEFKCKYEDEINRRTAENEFVVLKDKDADCLFLN  
KEELEVKVDLLRRQLELLKCVFEERAQVDRQL--CDTSVIVKMDNNSRDL-DMESIKNV  
ECWYQITAQKSKAEVAFYQTRFQELQDKRGGKCDLQSNKCEISELNRMIQKQCELEN  
VKKQVSLQTSICDVBQRGDALKDAREKHVELQNALQKAKDELACMLRDYQELNIVKLA  
LDIEIATYRKLLEGE  
>Chicken\_HBS3  
EREQMRSLNRRFASFDKVRFLQONKMLETKWALLQEQVLPK--QKNFKHVFTFICN  
LRRQLDGLMGRERLDSLELRSMQDMVEDFKKYEDEINRRTAENEFVVLKDKDADCLYLT  
KAELEAKLETLLKQIIEELKCMSAQGTAEKESL--CDTSVIVKMDNNSRDL-DMEGILRGI  
ELWYEDVAQKSKAEVAFYQTRFQELQDKRGGKCDLQSNKCEISELNRMIQKQCELEN  
VKKRVSSLRTSVSDTQRGDALKDAREKHVELQNALQKAKDELACMLRDYQELNIVKLA  
LDIEIATYRKLLEGE  
>Chicken\_K78LT  
EKEQIKTLNRRFASFDKVRFLQONKMLETKWALLQEQQSSRPE--ESRSITSFQSYINN  
LRRQLDGLMGRERLDSLELRSMQDMVEDFKKYEDEINRRTAENEFVVLKDKDADCLYLT  
KAELEAKLETLLKQIIEELKCMSAQGTAEKESL--CDTSVIVKMDNNSRDL-DMESIKNV  
ECWYQITAQKSKAEVAFYQTRFQELQDKRGGKCDLQSNKCEISELNRMIQKQCELEN  
VKKRVSSLRTSVSDTQRGDALKDAREKHVELQNALQKAKDELACMLRDYQELNIVKLA  
LDIEIATYRKLLEGE  
>Chicken\_K78L4  
EKEQIKTLNRRFASFDKVRFLQONKMLETKWALLQEQQSPSG--PRKNLDVIFENYIQG  
LRRLESLLGQRGELESELOQNRQYVEEYKTKYEDEINRRTAENEFVVLKDKDADCLYLT  
KAELEAKLETLLKQIIEELKCMSAQGTAEKESL--CDTSVIVKMDNNSRDL-DMESIKNV  
ECWYQITAQKSKAEVAFYQTRFQELQDKRGGKCDLQSNKCEISELNRMIQKQCELEN  
VKKRVSSLRTSVSDTQRGDALKDAREKHVELQNALQKAKDELACMLRDYQELNIVKLA  
LDIEIATYRKLLEGE  
>Chicken\_K78L3  
EKEQIKTLNRRFASFDKVRFLQONKMLETKWALLQEQQSPSG--PRKNLDVIFENYIQG  
LRRLESLLGQRGELESELOQNRQYVEEYKTKYEDEINRRTAENEFVVLKDKDADCLYLT  
KAELEAKLETLLKQIIEELKCMSAQGTAEKESL--CDTSVIVKMDNNSRDL-DMESIKNV  
ECWYQITAQKSKAEVAFYQTRFQELQDKRGGKCDLQSNKCEISELNRMIQKQCELEN  
VKKRVSSLRTSVSDTQRGDALKDAREKHVELQNALQKAKDELACMLRDYQELNIVKLA  
LDIEIATYRKLLEGE  
>Chicken\_K78L2  
EKEQIKTLNRRFASFDKVRFLQONKMLETKWALLQEQQSPSG--PRKNLDVIFENYIQG  
LRRLESLLGQRGELESELOQNRQYVEEYKTKYEDEINRRTAENEFVVLKDKDADCLYLT  
KAELEAKLETLLKQIIEELKCMSAQGTAEKESL--CDTSVIVKMDNNSRDL-DMESIKNV  
ECWYQITAQKSKAEVAFYQTRFQELQDKRGGKCDLQSNKCEISELNRMIQKQCELEN  
VKKRVSSLRTSVSDTQRGDALKDAREKHVELQNALQKAKDELACMLRDYQELNIVKLA  
LDIEIATYRKLLEGE  
>Chicken\_K78L1  
EREELKTLNRRFASFDKVRFLQONKMLETKWALLQEQSPPT--STRSLDPYFEAYISR  
LRKQLDGLSSEKIQLESELKSFQDMVEDFKKYEDEINRRTAENEFVVLKDKDADCLYLT  
KAELEAKLETLLKQIIEELKCMSAQGTAEKESL--CDTSVIVKMDNNSRDL-DMESIKNV  
ECWYQITAQKSKAEVAFYQTRFQELQDKRGGKCDLQSNKCEISELNRMIQKQCELEN  
VKKRVSSLRTSVSDTQRGDALKDAREKHVELQNALQKAKDELACMLRDYQELNIVKLA  
LDIEIATYRKLLEGE  
>Chicken\_K8  
EKEQIKTLNRRFASFDKVRFLQONKMLETKWALLQEQSQP---QRSDLRGLFEGYVGT  
LRRQLEGLGQERLRLAELELGSQGLVEDFKKYEDEINRRTAENEFVVLKDKDADCLYLT  
KAELEAKLETLLKQIIEELKCMSAQGTAEKESL--CDTSVIVKMDNNSRDL-DMESIKNV  
ECWYQITAQKSKAEVAFYQTRFQELQDKRGGKCDLQSNKCEISELNRMIQKQCELEN  
VKKRVSSLRTSVSDTQRGDALKDAREKHVELQNALQKAKDELACMLRDYQELNIVKLA  
LDIEIATYRKLLEGE



VKKQHQLQAAIAEAEENRGENMALKDARSKLQLEAALQKDKKEELARLLKEYQELLNKIA  
LDIEIAMYRKLLEGE  
>Alligator\_K78L3  
EKEQIKTLNKKFATFIDKVRFLQONKVLSTKWELLQQQGHSG--PRKDLSSLFENYIQN  
LRRQLDLSIHGQRQLESELQNMQNYVEDYKNKYEDEINRRTAAENEFVVLKDDVDCAYMT  
KVLEAKVQALIDEINFLRYVVEEELSQMOTIS--RDLVVVSMNDSRHL--DMSMIDEV  
RRQVEDIARSSRAEABAWYQSRYEELQTTAGRHGDNLNRTKQEIQELTRCIQRLRSEIEN  
VKKQXXX-----  
-----  
>Alligator\_K78L2  
EKEQIKTLNKKFATFIDKVRFLQONKVLSTKWELLQQQGPSG--PRRDLTALYENYIEN  
LRRQLDNVLSQRGPLESQHLDMQGYVEDYKNKYEEEINRRTSAENEFVVLKDDVDCAYMT  
KVLEAKVQALIDEINFLRYVVEEELSQLOTIS--RDLVVVSMNDSRHL--NLSIIDEI  
RAQVEQIAQSSRAEABAWYQSRYEELQSTAGQHGESLRNTRQEIQELTRCIQKLRSEIEN  
VRKQCBQLQAAIAEAEENRGENMALKDARCKLELECALHKDKKEELARLLKEYQELLNKIA  
LDIEIAMYRKLLEGE  
>Alligator\_K78L1  
EREQMKTLNKKFATFIDKVRFLQONKVLSTKWELLQEQGQGTGPHSRSLDQLYEYVINS  
LRKQLDGLTSEKSQLQLELKNCEDLVEDFKTKYDEEINKRTAAENEFVVLKDDVDAAYMN  
KVELQAKLDSLADELNFRRCVYDAELSQQQTV--SDTSVVLSDMNNRNL--DLDSIIAEV  
KAQYEBIAQKSRABEABAWYQCKYQELQVTAGKHGDSLKDTKAEISEMNRMIQRLRABEIN  
VKKQCNLQTSVADAEQRGELALDKARVKSLEEAALQKAKTELTRQLRDYQELMNVKLA  
LDIEIATYRKLLEGE  
>Alligator\_K8L2  
EKEELKTLNQQFVHLIERVCSLEQHKVLETKCSILKSQA----TPARMENLLKTYISQ  
LKKHLADQGMKGLHLELHEIQDIMDENKQKYEDEFNLRNEKENDFLLMKKEMDEAYIS  
QNELEKGLDRLRDELEFLKNFYDQEMHELQTEVHMYKESVVISMPSPSL--EVDIVSEA  
QSQYEMARSSCKEAEKAYDRHNKLDKSMGRHGEELQTMKTEINDLTRKSHQIQLEIQN  
LKEQCNLKEEDIANADRYKFPIDKVRFLQONKVLSTKWELLQEQGQGTGPHSRSLDQLYEYVINS  
LDIEIATYRKLLEGE  
>Alligator\_K8L1  
EKEQIKSLNKKFATFIDKVRFLQONKVLSTKWELLQEQGQGTGPHSRSLDQLYEYVINS  
LRRQLEGLDQDKLRESELGNVQGLVEEFRSKYDEEINKRTEKENEFFVVLKDDVDAAYMN  
KVELESRLGLTDEISFLRLYEELHQLSQV--SNTSVVLSMDNNRNL--DMSI IADV  
RNQVEDIANQSRABEABAWYQCKYQELQVTAGKHGDDLNRNKAIEISELTRIQRMQAEIDA  
VKQRANLEAAIAEAEENRGENMAVRDARGKLALEEAALQKAKQDMARQLREYQELMNVKLA  
LDIEIATYRKLLEGE  
>Turtle\_k80  
EKDEMILNDQFASLIGVQCLEQONKVLSTKWELLQEQGQGTGPHSRSLDQLYEYVINS  
LRKQLEGLDQDKLRESELGNVQGLVEEFRSKYDEEINKRTEKENEFFVVLKDDVDAAYMN  
RTELEVKQLQGLQELMELKAVYEQELQELLAEI--KDISIVMGIDNRCNL--DLRRIEIV  
RAQYEAALFRSWEABALTWSKLNETHSATYRDQLFSGRREIAELTHIQKLRTRCIVS  
LKSQCLRLLEEDIKEAGGNQGLALRNANTKLALEEAALQKAKQDMARQLREYQELMNVKLA  
LDVEILTYRKLVEGE  
>Turtle\_k7  
EKEQIKTLNKKFATFIDKVRFLQONKVLSTKWELLQEQGQGTGPHSRSLDQLYEYVINS  
LRRQLEGLDQDKLRESELGNVQGLVEEFRSKYDEEINKRTEKENEFFVVLKDDVDAAYMN  
KVELESRLGLTDEISFLRLYEELHQLSQV--SNTSVVLSMDNNRNL--DMSI IADV  
RNQVEDIANQSRABEABAWYQCKYQELQVTAGKHGDDLNRNKAIEISELTRIQRMQAEIDA  
VKQRANLEAAIAEAEENRGERAIKIDAMAKQEBLEEAALNKKAKQDMARQLREYQELMNVKLA  
LDIEIATYRKLLEGE  
>Turtle\_k84L  
EKEQIKLNNKFATFIDKVRFLQONKVLSTKWELLQEQGQGTGPHSRSLDQLYEYVINS  
LRRQLEGLDQDKLRESELGNVQGLVEEFRSKYDEEINKRTEKENEFFVVLKDDVDAAYMN  
KAELEVKVESLIDEITFLRRYEEELACLQASI--LDSVIVQMDNNRNL--NMDI IADV  
KAQYEDIANSRABEABAWYQCKYQELQVTAGKHGDDLNRNKAIEISEMNRMIQRLRSEIDN  
VKKQASLQTAIADAEQRGELALDKAQAQKLALEEAALQKAKADMARQLREYQELMNVKLA  
LDIEIATYRKLLEGE  
>Turtle\_k5L4  
EKEQIKTLNKKFATFIDKVRFLQONKVLSTKWELLQEQGQGTGPHSRSLDQLYEYVINS  
LRRQLEGLDQDKLRESELGNVQGLVEEFRSKYDEEINKRTEKENEFFVVLKDDVDAAYMN  
KVELESRLGLTDEISFLRLYEELHQLSQV--SNTSVVLSMDNNRNL--DLDSI IREV  
KAQYEBIANSRABEABAWYQCKYQELQVTAGRHGDDLNRNKAIEISEMNRMIQRLRSEIDN  
VKKQASLQTAIADAEQRGELALDKAQAQKLALEEAALQKAKADMARQLREYQELMNVKLA  
LDIEIATYRKLLEGE  
>Turtle\_k5L3  
EKEQIKTLNKKFATFIDKVRFLQONKVLSTKWELLQEQGQGTGPHSRSLDQLYEYVINS  
LRRQLEGLDQDKLRESELGNVQGLVEEFRSKYDEEINKRTEKENEFFVVLKDDVDAAYMN  
KVELVAKVDSLTDIEINFLRALYEELAQMQTV--SNTSVVLSMDNNRNL--DLDSI IAEV  
KAQYEBIANSRABEABAWYQCKYQELQVTAGRHGDDLNRNKAIEISELTRIVQRLRNEIDN  
VKKQCANLQAAIAEAEENRGENMALKDARAKLALEEAALQKAKADLARQLREYQELMNVKLA  
LDIEIATYRKLLEGE  
>Turtle\_k5L2  
EREQIKTLNKKFATFIDKVRFLQONKVLSTKWELLQEQGQGTGPHSRSLDQLYEYVINS  
LRRQLEGLDQDKLRESELGNVQGLVEEFRSKYDEEINKRTEKENEFFVVLKDDVDAAYMN  
KVELQAKADALADEINFLRALYEELAQMQTV--SNTSVVLSMDNNRNL--DLDSI IREV  
KAQYEBIANSRABEABAWYQCKYQELQVTAGRHGDDLNRNKAIEISELTRIVQRLRNEIDN  
VKKQASLQTAIADAEQRGELALDKAQAQKLALEEAALQKAKADLARQLREYQELMNVKLA  
LDIEIATYRKLLEGE  
>Turtle\_k5L1  
EKEQIKSLNKKFATFIDKVRFLQONKVLSTKWELLQEQGQGTGPHSRSLDQLYEYVINS  
LRRQLEGLDQDKLRESELGNVQGLVEEFRSKYDEEINKRTEKENEFFVVLKDDVDAAYMN  
KIDLEAKVDALMDEINFLRFLYDAELAQLNVQV--SDTSVILSDMNNRNL--DLSSIVNEV  
KAQYEDIANSRABEABAWYQCKYQELQVTAGKHGDDLNRNKAIEISELTRIVQRLRNEIDN  
ARNQASLQTAIADAEQRGELALDKARMKVADLEDAALQKAKADLARQLREYQELMNVKLA  
LDIEIATYRKLLEGE  
>Turtle\_HBS1  
EKEQIKCLNDQFACFIDKVRFLQONKVLSTKWELLQEQGQGTGPHSRSLDQLYEYVINS  
LRRQLEGLDQDKLRESELGNVQGLVEEFRSKYDEEINKRTEKENEFFVVLKDDVDAAYMN  
KIDLEAKVDALMDEINFLRFLYDAELAQLNVQV--SDTSVILSDMNNRNL--DLSSIVNEV  
KAQYEDIANSRABEABAWYQCKYQELQVTAGKHGDDLNRNKAIEISELTRIVQRLRNEIDN  
VKKQASLQTAIADAEQRGELALDKARMKVADLEDAALQKAKADLARQLREYQELMNVKLA  
LDIEIATYRKLLEGE  
>Turtle\_HBS2  
EREQMKTLNQQFACFIDKVRFLQONKVLSTKWELLQEQGQGTGPHSRSLDQLYEYVINS  
LRRQLEGLDQDKLRESELGNVQGLVEEFRSKYDEEINKRTEKENEFFVVLKDDVDAAYMN  
KIDLEAKVDALMDEINFLRFLYDAELAQLNVQV--SDTSVILSDMNNRNL--DLSSIVNEV  
KAQYEDIANSRABEABAWYQCKYQELQVTAGKHGDDLNRNKAIEISELTRIVQRLRNEIDN  
VKKQASLQTAIADAEQRGELALDKARMKVADLEDAALQKAKADLARQLREYQELMNVKLA  
LDIEIATYRKLLEGE  
>Turtle\_k78L4  
EREQIKTLNKKFATFIDKVRFLQONKVLSTKWELLQEQGQGTGPHSRSLDQLYEYVINS  
LRRQLEGLDQDKLRESELGNVQGLVEEFRSKYDEEINKRTEKENEFFVVLKDDVDAAYMN  
KIDLEAKVDALMDEINFLRFLYDAELAQLNVQV--SDTSVILSDMNNRNL--DLSSIVNEV  
KAQYEDIANSRABEABAWYQCKYQELQVTAGKHGDDLNRNKAIEISELTRIVQRLRNEIDN  
VKKQASLQTAIADAEQRGELALDKARMKVADLEDAALQKAKADLARQLREYQELMNVKLA  
LDIEIATYRKLLEGE

KAQYEDIANRSRAEAEAWQSRQYQELQVTATTHGEDLKVTRNEISEVSRVIQRLKAEIDS  
VKKQIAGLQTAIADAEQRGELALKDARGKLADLQNALQTTKDELARLLRDYQELMNVKLS  
LDIEIATYRKLLEGE  
>Turtle\_k78L3  
EREQIKTLNKKFASFDKVRFLQONKVLTKWLLQQQTSN--AGNLEPAFEAYVGS  
LRKHLDSLVGERGRQDSELNMQDLVEDLKHKYEDEENRMAAENEFVLLKDLDAAYMK  
KLEMEAKVAAMTDEINFLRALYETELAQMQRQI--SDTSVILSMNDRAL-DLDGIIAEV  
KAHYEDMANRSRAEAEAWQSRQYQELQVTAGKHNDLKNKSKLEISELTRLIHRQLAELEN  
VKKQCAKLQSAVAETBGRGELTKDAREKLVLEEMALQAKAETARLLRDYQELNKKLA  
LDIEIATYRKLLEGE  
>Turtle\_k78L2  
EKEQIKVLNNQFAVFDKVRFLQONKVLTKWLLQQQGGTI--IKKDLAPLFENFIQS  
LRRRLDGLQNGKQGLQSELENMQYVEEYKHKYEDEENKRTAAENEFVLLKDDVDNAYMV  
KVELETRVQGLTDEINFLRFIFEEELSOLQITIS--RDLVSVVSMNDRNL-DLDGIIQEV  
RNQYETIAQSRRAEAEAWQSRQYQELQVTAGRHGDNLNRNKTTEIQELTRSIQRMRAEIES  
VKKQIANLQSAIAEAEKGEALAKDARAKLDLLEHALQKADLANLLKEYQDLNKKLA  
LDIEIATYRKLLEGE  
>Turtle\_k78L1  
EREQIKTLNKKFASFDKVRFLQONKVLTKWLLQQQGGP--IKKSLDQLFEAYSNG  
LRKQDGLNERRQLDTERKNFQDLVEDFKHKYEDEENRRTAAENEFVLLKDDVDVAYMS  
KVELQVKLDSLTDEINFLRCLYEAELSQQMOTA--SDTSVILSMNDRNL-DLDSIIEV  
KAQYEEIAQSRRAEAEAWQSRQYQELQVTAGKHGDSLRDSEISELNRMIIQRLAEIEN  
VKKQERLQTSIADAEQQGELVLDKAKGLAELEGALQAKADLARQLREYQELMNVKLA  
LDIEIATYRKLLEGE  
>Turtle\_k8L  
EKEQIKTLNKKFAHFINKVTRLEQENQVLTKWLLQQQGT---GPSNMEKMLKAYINS  
LQKQEDLQQRVKLESDQGNMQDLVEEFKHKYEDEENRRTAAENEFVLLKDDVDVAYIK  
KQELVVKLQSLTDEINFLMELYAKELRELQADVEMSNPVPVSVDSKPKL-DVDSIIAEA  
RVQYEMANRSRAEAEAWQSRQYQELQVTAGKHGDSLRDSEISELNRMIIQRLAEIEN  
LKEQNAKLEANIQAEEQGLAVADATGKLGKMEHALQKAKEDMNVQREYQALMNVKLA  
LDIEIATYRKLLEGE  
>Turtle\_k8  
EKEQIKTLNKKFASFDKVRFLQONKVLTKWLLQQQGT---TRSNMNLFEAYINN  
LRRQDGLQGEKLLKLAELGNMQDLVEEFKHKYEDEENRRTAAENEFVLLKDDVDVAYMN  
KVELESRLSLETLDEINFLRQLYDEELRELQSQV--SDTSVILSMNDRNL-DLDGIIAEV  
RAQYEMANRSRAEAEAWQSRQYQELQVTAGKHGDSLRDSEISELNRMIIQRLAEIEN  
LKGQRASLEAAITAEEREGEMAKIDASAKLAELEGALQAKADLARQLREYQELMNVKLA  
LDIEIATYRKLLEGE  
>Lizard\_k80  
EKEQIKTLNKKFASLIGKVNQLEQHNQVLLTRWNFLREQDNL--SLLDKLLDYQYMN  
LRLEIRSIDNEKEQLDAELDEVLDMNDVNRNVEEENKRTGMEFTTALKKDLNDFLH  
KTELEAKLSGLHAWVLMKNIQEQLVEEMVSV--KDVSVVLGIDNNRNPDPHRIEVEDV  
RAQYEMANRSRAEAEAWQSRQYQELQVTAGKHGDSLRDSEISELNRMIIQRLAEIEN  
LKSQCLRLLEDNIKDVGLQGTALNDAKAKLAKLEALHNKQDLAQLVKQYQELMNVKLA  
LDIEIATYRKLLEGE  
>Lizard\_k7  
EKEQIKTLNKKFASFDKVRFLQONKVLTKWLLQQQGT---TKSNLAPIFETYISN  
LRRQDGLQGEKLLKLAELGNMQDLVEEFKHKYEDEENRRTAAENEFVLLKDDVDVAYMN  
KVELESKVDGLTDEINFLRFYEAELRELHNQI--SDTSVILSMNDRNL-DLDSIIAEV  
KAQYEBIANRSRAEAEAWQSRQYQELQVTAGKHGDSLRDSEISELNRMIIQRLAEIEN  
IKNQGRKLEAAITAEEREGELAVKDARAKLQELNALKAKQEMARQLREYQELMNVKMS  
LDIEIATYRKLLEGE  
>Lizard\_k84L1  
EKNEQLQNLKSFASFDKVRFLQONKVLTKWDFLQERKC---CKSNMEPMFKEYIAN  
LKEQECMECERAOQAEMKNWREALEVNNKKEEENRRTAAENEFVLLKDDVDVAYMMD  
KSEKAKVQALMKDLFFYKPTFYQELHELQSCI--SDTCVTVQMDNSRGL-NMDCVMEVY  
RRQFEIISRSRAEAEAWCQCQYQELKTTAAKHCDNLRHVKDEELSEITRVVHRELESEVN  
VKAQCTKLEEVAAAEERGGIAVKDARCKLVLEEDALHKAQDMACQLREYQELMNMKMG  
LDIEITTYKLLDGE  
>Lizard\_k84L2  
EKNEQLQNLKSFACFDKVRFLQONKVLTKWDFLQEKKC---QSNMDFMFEYISR  
LRKELERLQWERNQQLVEVNNRDTMEGNKKEEENRRTAAENEFVLLKDDVDVAYMIFME  
KSEKAKVETLMDQDFFYKPTFYQELHELQSCI--SDTCVTVQMDNSRGL-DVACIIEEF  
RCRYEDIASRSRAEAEAWCQCQYQELKTTAAKHCDNLRHVKDEELSEITRVVHRELESEVN  
VKAQCTKLEEVAAAEERGGIAVKDARCKLVLEEDALHKAQDMACQLREYQELMHLKLA  
LDIEIATYRKLLEGE  
>Lizard\_k84L3  
TKNEQLQNLKSLASFINKVQLEQHNQVLLTRWNFLREQDNL--HRSDMEPLFDDHTSR  
LKELECLEREKEMQIEHDSQAQTEKNSRYEENRRTAAENEFVLLKDDVDVAYMIFAD  
KAELEAKVETLMDQDFFYKPTFYQELHELQSCI--SDTCVTVQMDNSRGL-DMNRTIEEF  
RRQHEVIASRSRAEAEAWCQCQYQELKTTAAKHCDNLRHVKDEELSEITRVVHRELESEVN  
IKTQRCRLEDEVEAKEHGETAVKDARCKLVLEEDALHKAQDMACQLREYQELMNVKMA  
MNIEIATYRKLLEGE  
>Lizard\_k84L4  
EKEQIKTLNKKFASFDKVRFLQONKVLTKWLLQQQGT---VKSNIPLFDGLIHK  
LKKQLESGLCDNRKLESDLTSSRDILEDYRKYRDEENRRTAAENEFVLLKDDVDVAYM  
KADLEGKVESLVEVNFRLRCLHDMELQELHSCI--SDTSVILSMNDRNL-DLDGIIAEV  
KAQYEDIANRSRAEAEAWQSRQYQELQVTAGKHNDLNRNKTTEIQELTRSIQRMRAEIES  
VKKQCAKLQSAVAETBGRGELTKDAREKLVLEEMALQAKAETARLLRDYQELNKKLA  
LDIEIATYRKLLEGE  
>Lizard\_k5L4  
EKEQIKTLNKKFASFDKVRFLQONKVLTKWLLQQDQKI---TRHNFAMFEAYITN  
LRRQLEGILGERPRLESELKNMQDVEFRIRYDEENKRTAAENEFVLLKDDVDVAYM  
KVELEARVDSINDEATFLKSFYDAELAQMHAQV--SDTSVILSMNDRNL-DLDSIIAEV  
KAQYEDIANRSRAEAEAWQSRQYQELQVTAGKHNDLNRNKTTEIQELTRSIQRMRAEIES  
VKKQCAKLQSAVAETBGRGELTKDAREKLVLEEMALQAKAETARLLRDYQELNKKLA  
LDIEIATYRKLLEGE  
>Lizard\_k5L3  
EREQIKTLNKKFASFDKVRFLQONKVLTKWLLQQQGT---CKSNIPLFEMVIND  
LRKLANLNDGRLLGELNINQNLVEDCKNKYEDEENKRTAAENEFVLLKDDVDVAYLN  
KVELESKADSLNCEVNFRLRCLYEAELQMHQI--SDTSVILSMNDRNL-DLDSIIAEV  
KAQYEDIANRSRAEAEAWQSRQYQELQVTAGKHNDLNRNKTTEIQELTRSIQRMRAEIES  
VKKQCANLQAAIAEAEEREGELALKDARAKLAELEGALQAKADLARQLREYQELMNVKLA  
LDIEIATYRKLLEGE  
>Lizard\_k5L2  
EREQIKTLNKKFASFDKVRFLQONKVLTKWLLQQQGT---QQSTMEPLFDVYITN  
LRRQLEALNDRGRLLGELNINQNLVEDCKNKYEDEENKRTAAENEFVLLKDDVDVAYMN  
KIELAGKVESLVEVNFRLRCLYEAELQMHQI--SDTSVILSMNDRNL-DLDSIIAEV  
KAQYEDIANRSRAEAEAWQSRQYQELQVTAGKHNDLNRNKTTEIQELTRSIQRMRAEIES  
FKKQCANLQAAIAEAEEREGELALKDARAKLAELEGALQAKADLARQLREYQELMNVKLA  
LDIEIATYRKLLEGE  
>Lizard\_k5L1  
EKEQIKTLNKKFASFDKVRFLQONKVLTKWLLQQDQFKTGANKGNLDFEAYINN  
LRKQNLGLINEKGRLDGELNMQDVEEFKHKYEDEENRRTAAENEFVLLKDDVDVAYMN

KVELEAKVDSLTDENLFRALYEAEALQQAQ--SDTAVILSMDNRRDL-DLNGIVSEV  
KAQYEDIANRSRAEAEAWYQTKFEELQATAGRHGDDLNRKGEISELNRLIQRIRABEIN  
ARNQCANMQTAIADAEADRGEALAKDARAKLIELEALQKAKEEMTRLLREYQELMNVKLA  
LDIEIATYKLLLEGE  
>Lizard\_HBS1  
EKEQIKDLNNQFACFIDKVRVLEERNQALATKWELLKSQNP--VKKDLSPLCENYITS  
MRRKLDNLLCEKNLQOEHTMLDLIEANRCKYEEVRRRTAENEFIVLKQDQVDFGIFKK  
QKLEQKKEVLEENIGFLTNFFSKERAILESQI--NNTSVVVMNDSRCL-DMDGLIQEI  
ESWYQGIQVQSKGEANLFYWNQMEDLQSKRSQFYEKLRQNNADIAELNRYVQIMRCQVGT  
EKQKVASLHAALRETKELGDHALQDAESKYKDLQNRVQTSKDRLVALVRDYQDLNNTKLA  
LDIEIATYKLLLEGE  
>Lizard\_HBS2  
EKEEMKTLNNQFACFIDKVRVLEQNKVLTGWELLNQCQVPA--KKNLEGYENFIAT  
LKKQLECLLSERGLLEHEQKNMQLVEEYRSKYEEVNRRTAENEFVVLKQDQVDFGIFLT  
KEELESKVDVLAQELVLRVFAEELTQLDSQI--LDTSVILKMDNTRDL-HMDLIIQNV  
ENWYQNIHNSKQEAFAFYHNKIAEIQNNRSKFNEELKCNQHEIAELNRYVQIRLRTDLGN  
AKKQVNSLQSAICDAEQRGDIALKDARNKHAELQNAQQSKDKLASLLRDYQDLNNTKMA  
LDIEIATYKMLLEGE  
>Lizard\_HBS3  
EREEMKTLNNQFACFIEKVRILEQENKALETWNLLQYAMV--PRNLEPYENFIEN  
MKYQIDCLLHTREHLANDKNAIQELVEDFKSKYEEVRRRTAENEFVVLKQDQVDSISLS  
KTELEGKMNLLRWELEFRKSVYMEELMQLSGQI--SDMNILVQMDNRRDL-DMSI IKNV  
EAWYQSIHRSKQEVNAYADRFQELQEQRGKYLNLDKINQYEIEELTRAVHTLQSDHSN  
VKKQVADLQASICDQVQRGDQALKDAQEKHSLLSALQKAKDDLQAGLKDYHDLNNTKMA  
LDIEIATYKLLLEGE  
>Lizard\_K78L1  
EREQIKTLNDQFACFIDKVRHLEQNKLETKWVSLQEQEPM--EKQNTHELYQNYIVT  
LKKQLDLDLDEREQKLEQVQFQDVEEYKSRYEYGVNRRLLGAENEFVVLKQDQVDCAYTS  
KVELEKVDLRLQEQDFHRCVVDTELES-ATA--SDTNVVMNDSRDL-DMEGIESV  
RCQYEBIAQRSKDEVNAYETKYKELQTTWGHHCNSLSSSRHEIQELTRLIQRKADVEN  
GKKQVEALQVAVADHEQQGDCTLKDAKEKLAIEVEKALQSTKDELARLLRDYQELNNTKVA  
LDIEIAMYKLLLEGE  
>Lizard\_K78L5  
EREQIKTLNNKFASFIDKVRVLEQNKVLETKWLLYQQTGPA--LRDNLEPLYEAYIDT  
LRRQFESLINDKNHLDIELKNTQELVEDFKSKYEDEINKRTACENDFVVLKQDQVDSYMH  
KIDLGSKADSLTQHIQFLRALFETELSQVQSQV--RDTNVVLQMDNRRDL-DLNGIIAEV  
RAQYEDIANRSRAEAEAWYQSKYQELQTTAQKHCDLKTTKDDIAEMSRVHVHKLRAEIEI  
VKKAVNGLQSSIAESEQRGEIALKDAKQLLQALTSKDELARLLRDYQELMNVKLA  
LDVEIATYKLLLEGE  
>Lizard\_K78L4  
EREQIKTLNNKFASFIDKVRVLEQNKVLETKLNLQYQGSTA--TTIHIDPMFEAYINN  
LRNQLDGLVGRDLGELNRTQDLVEDYRKYEDEINKRTAENEFVVDIKKNVDDGGFMH  
KIELGAKADGLTDEINFLRALHEAELSQIQGR--SDTNVVLQMDNRRDL-DLNSIIEV  
KAQYEDIANRSRAEAEALYQSKFQELQSTAVNHGDDLKNTKNEIAELSRIQRMKAEIDN  
VKKQIAGLQTAIADAEQRGELALKDARVKTDLQHALQSAKDELARLLRDYQELMNVKLA  
LDVEIATYKLLLEGE  
>Lizard\_K78L3  
EREQIKLNDKFAFIDKVRVLEQNKVLETKLNLQYQPMH--LKRKADHTFEAYIHG  
LRQLESLSTERGLRGLSEWKNMQLDVEDFKSKYEEVINKRTAENEFVVLKQDQVDAAYMN  
KMLKTRTASLDKEVDFLRSLYEELQMQSQV--TDTSVILSMDNRRDL-DMDVIAEV  
KAQYEDMANRSRAEAVDAMYQSKFQELQTAGKHDDALKNKSKTEIELENLRIHRLRAETGT  
VKKQCAFQSSIAEAEERGETALKDAREKLTKELENATQKSNELVRLLRDYQELNNTKIS  
LDIEIATYKLLLEGE  
>Lizard\_K78L2  
EKEQIKLNNQFANFIDKVRVLEQNKVLTQKWILQYQQTQGRG-PMQNLDGEYQLFLNG  
LRNQIDQIRSQKQQLMSELQNMQVVEDSKNKYEQEINQRTTSENEFVVLKQDQVDSAYMT  
KVDLDAKVGIVQEQINFRRIFDIELSQIPIGG--KDTSVVVMNDSRDL-NLEGMIDV  
RAQYEVARSRAEAEAWYRSQYELQNAAGRHGENLQNTREQEIQELTRNIQRLRTEIEH  
AKKQAQMQSAIAEAEERGEMALRDAKQKLEDEGLSKTDXEVLARLLKKEYQDLNNTKVA  
LDMEIAMYKLLLEGE  
>Lizard\_K78L1  
EKEQIKTLNNKFASFIDKVRVLEQNKVLETKYKLLQEQGPGA--IQKHLDPMEAYINN  
LRRQLDCLQNEKRLGDELKNMQLDVEDFKSKYEEVINKRTAENEFVVLKQDQVDAAYMN  
KVELQAKCDALIDEINFMKLYEAELSQQMQTV--SDTSVILQMDNRRDL-DMSIIEV  
KARYEBIAQMGRIEASFYQSKYELQASVQKHDNLQKTKAEISEHNRMIQRIRABEIDN  
VKKQCKLKSIIAEAEERGELALKDARNKLELEALQKAKEEMTRLLKKEYQELMNSCKLA  
LDVEIATYKLLLEGE  
>Lizard\_k8  
EKEEIKSLNNKFAGFIDKVRVLEQNKMLDTKWSLLQNKI---TRSNMDSMFEAYINN  
LRRQLDGLQGERVRLDSELGNMQLVEEYKSKYEDEINHRTEKENDFVVLKQDQVDAAYMN  
KIELESRLSLTDELNFRQLHEEELRVLQSQI--SDTSVILSMDNRRDL-DLNGIIAEV  
KAQYEVAAARSRAEAEAWYQSKYELQVAGKHGDDLRIITKNEISELNRLITRIQSEIDG  
LKGQRANLESAIAEAEERGETLAVKDATAKLELEALQKAKQDMARQLREYQELMNVKLA  
LDIEIATYKLLLEGE  
>SnakeP\_k80  
EKEEIKTLNNQFAALIGKVSLEQHNQVLLTRWFLKEQDSSL--SDLDIKLLYDRYMNK  
LNLEIRSIDVEKEQLDSELDEVLASMDVFRSKFEEVINKRSGLEFTFTLKKDLNDFGLH  
KTELETKLSGLHAWVLEMTTIQEQLLEEVMSQI--KDVSVVLGIDNRRYMPDPHRIVEDV  
RAQYEDLARSWELEALTRSKLNEREVLQSAKYGDDLNRDRVIAELNLIQIKMRSCIVS  
LKSQCLQLEDNINKVGLQGETALNDAKAKLAKLELADLHSAQDLAQLVKEYQELMNVKLA  
LDIEILTYKLLVEGE  
>Snake\_K7  
EKEQIMVLLNNKFASFIDKVRVLEQNKMLTKWVSLQEQSTST---RNNTAPVFDAYINN  
LRRQLDQLQNDKGRLEGEKNNMQLDVEDFKSKYEDEINKRTAENEFVVLKQDQVDSAYMN  
KVELEARVDGLTDEINFLRALYDAELAEALQNV--SDTSVILQMDNRRDL-DLDSIIAEV  
KAQYEDIANKSRIEAESWYQSKFVQLQTAGKHGDDLSTRNEIAELNRLILRLQADIDN  
VKNQRAKLESAIAEAEERGETLAVKDAKGLLELEVAMNKAQEMAHQLREYHELMNVKLG  
LDIEIATYKLLLEGE  
>Snake\_K5L2  
EKEQIKLNNKFASFIDKVRVLEQNKVLETKWVSLQEQSTST---VMSNVEPLFEAYINN  
LRTQVNDLEKEKVLGDELHHTQNLVEDYKSKYEDEINKRTAENEFVVLKQDQVDAAYMN  
KADLETRLQSLVDETFDLRLHETELADLQRI--SDTSVILSMDNRRDL-DLDSIIAEV  
KAQYEDIANKSRIEAESWYQSKFVQLQTAGKHGDDLSTRNEIAELNRLILRLQADIDN  
VKNQRAKLESAIAEAEERGETLAVKDAKGLLELEVAMNKAQEMAHQLREYHELMNVKLG  
LDIEIATYKLLLEGE  
>Snake\_K5L1  
EREQIKTLNNKFASFIDKVRVLEQNKVLETKWVSLQEQSTST---QQRNLEPLFENYIAN  
LRKQFDYLVNERGRDMELRNMQMDVEDFKSKYEDEINKRTAENEFVVLKQDQVDAAYMN  
KIELEASDSDLNDEIEFLKALFEAELSQQMQTV--SDTSVILSMDNRRDL-DLNSIIEV  
KAQYEDIANRSRAEAEAWYQSKYELQVAGRHGDDLNRNTKTEISELNRLITRIQSEIDG  
YKQCANIQAAIAEAEERGETLAVKDAKGLLELEVAMNKAQEMAHQLREYHELMNVKLG  
LDIEIATYKLLLEGE  
>Snake\_HBS1  
EMEQLSLNSKFAGFIDKVRVLEQNKVLETKWVSLQEQSTST---PTSELCMFEQYIAS

LKKELEYLQYEKENLQNDRESAKAQTADCKCKYEEKVKQHVAEKE I I ELRKDVYDIFSN  
NAELERKVSLLDREIKFLKCVYKKEKEQLDKQD -- QDVVVVKMDNSRNL - DMDNIAIMV  
RKQYEBIMQRSKAEADKFKYQNKYEEAQKSSSYKWDLKNRQEQI SELIQQVEKVGQEIQS  
LQKENEELKKTICAAAGGEGQASKEGQKYAELVKALQNGKDELASLVRDYQKVLNVKIV  
LDIEIAAYKCLLEGE  
>Snake\_HBS2  
EKDQMKDLNTQFASFIEKVRSLERQRNRLITKWELLQNKQMPK -- VKKDLSTLFDNYIAN  
LRKKIDYMFNEKNLQNRMMQDLIEEYQCRYKEENNRKHELENEFILLKQVVDNEFKE  
QKERELKRELLMENKFLKYFFTEHAILNCHP -- PDTSVVLKMDNSRGL - DMDVLKNI  
DSWYHNIQRSKAEALFYQNI EDLQNKCCQRESLQKTSDEITELNRLVHLMQSKLDN  
EKKTAALQIAIGDIEHKGDHALKDARAKQTELRQNRQNSKQDLAVILRDYQDLNMTKLA  
LDIEIATYNTMLEGE  
>Snake\_HBS3  
EKEEMKILNNQFACFIDKVRSLERQNKVLETKWELLNQYVQPT -- RKNLEAYYGNF IG  
LKKQLECVLTEREKLEHEQKNMQELVEEYRSRYEDEVNRRTAENDFVLLKQVVDVDFLT  
KEELESKVDVLAQELVLRCIFAEELTQFNHQI -- CDTSVVLKMDNTRAL - DMDLILKNV  
EAWYQNIHTSKQEAFAVYHSKIAEIQNNRKGKFNELKNNQHEIAELNRVVRQLQADTDN  
AKQVSSLQSAICDSEQRGDIALKDARTKHELELQTAQQSKDKLACLRLRDYQELNMTKLA  
LDIEIATYKALLEGE  
>Snake\_HBS4  
EREEMKSLNNQFASFIDKVRNLELQNKVLETKWELLQEHVIP -- AKKSLPEYENFISN  
MKQLECLLNNQEHLEARNENDGIEQLVEDFKCNYEEEFKRRRTAENEFVLLKQVVDVDSISLS  
KSELEKGVHLLSGLEFRRIYAEELAQSTNV -- YDTNILLQMDNSRNL - NDSI I KSV  
EAWYQNIHTSKQEAFAVYHSKIAEIQNNRKGKFNELKNNQHEIAELNRVVRQLQADTDN  
IKKQVNGFQTSVCEIEBQHGDCVLDKARDKHIDLQTAQVQAKADDLARLLRDYQELNMTKLA  
LDIEIATYKALLEGE  
>Snake\_K78LT  
EREQIKTLNNDKVFVSDKVRKLEQNKVLETKWELLQEQEPV -- EKANIQLPFENYITS  
LKQQLRLLNREERQLEQSKFQDMVEEFKSRYEENINHRMSAENNFVLLKQVVDVDSISLS  
KVDLEKVESLRQELNFRICVFEAEIESLQAAAN -- AETNVIVSMDNSRNL - DMEGI IHSV  
RSQYEBIAQKSKDEVNALYENKYELQNTWGNYNLSSGRHEIQELTRMVRQCRSEVES  
TKKQIDALQTSIADNEQRGESALKDARTKHELELQTAQVQAKADDLARLLRDYQELNMTKLA  
LDIEIATYKALLEGE  
>Snake\_K78L4  
EREQIKTLNNDKVFVSDKVRKLEQNKVLETKWELLQEQGSPA -- LRDNLEPIEYAEFIEA  
LRRQFDSLGNKNDHLDIEELKNTQELVEDFKNKYEDEINKRTACENDFVLLKQVVDVDSYMH  
KIDLGSKADSLTQYIQLRALFQELTQLHSQV -- KETNVILQMDNDRDL - DLDSIAEV  
KAQYEBIANRSRAEAEAWYQTKFQELQSTAFKGGDLKTKTDEIADLSRIVQRIRSEIEI  
VKKAISSLQSLGEABQRGELALKDARTKHELELQTAQVQAKADDLARLLRDYQELNMTKLA  
LDVEIATYRLLLEGE  
>Snake\_K78L3  
EREQIKTLNNDKVFVSDKVRKLEQNKVLETKWELLQEQGSSV -- PKLSLEPLFENYILN  
LRRQFDSLGNKNDHLDIEELKNTQELVEDFKNKYEDEINKRTACENDFVLLKQVVDVDSYMH  
KIDLGSKADSLTQYIQLRALFQELTQLHSQV -- KETNVILQMDNDRDL - DLDSIAEV  
KAQYEBIANRSRAEAEAWYQTKFQELQSTAFKGGDLKTKTDEIADLSRIVQRIRSEIEI  
VKKAISSLQSLGEABQRGELALKDARTKHELELQTAQVQAKADDLARLLRDYQELNMTKLA  
LDIEIATYRLLLEGE  
>Snake\_K78L2  
EKEQIKVLLNNQFASFIDKVRKLEQNKVLETKWELLQEQGSGIG - PTMNLADDFQQLNS  
LRSQIENIRSQKGLTTEQLSMQHYVEEYKKNYEENINRRTAENDFVLLKQVVDVDSYMH  
KIDLGSKADSLTQYIQLRALFQELTQLHSQV -- KETNVILQMDNDRDL - DLDSIAEV  
KAQYEBIANRSRAEAEAWYQTKFQELQSTAFKGGDLKTKTDEIADLSRIVQRIRSEIEI  
VKKAISSLQSLGEABQRGELALKDARTKHELELQTAQVQAKADDLARLLRDYQELNMTKLA  
LDIEIATYRLLLEGE  
-----  
>Snake\_K78L1  
EREQIKTLNNDKVFVSDKVRKLEQNKVLETKWELLQEQGQGTG - GQKNLDHFFEAYISN  
LRRQFDSLGNKNDHLDIEELKNTQELVEDFKNKYEDEINKRTAENDFVLLKQVVDVDSYMH  
KIDLGSKADSLTQYIQLRALFQELTQLHSQV -- KETNVILQMDNDRDL - DLDSIAEV  
KAQYEBIANRSRAEAEAWYQTKFQELQSTAFKGGDLKTKTDEIADLSRIVQRIRSEIEI  
VKKAISSLQSLGEABQRGELALKDARTKHELELQTAQVQAKADDLARLLRDYQELNMTKLA  
LDIEIATYRLLLEGE  
>Snake\_K8  
EKEEIKTLNNDKVFVSDKVRKLEQNKVLETKWELLQEQGQGTG - GQKNLDHFFEAYISN  
LRRQFDSLGNKNDHLDIEELKNTQELVEDFKNKYEDEINKRTAENDFVLLKQVVDVDSYMH  
KIDLGSKADSLTQYIQLRALFQELTQLHSQV -- KETNVILQMDNDRDL - DLDSIAEV  
KAQYEBIANRSRAEAEAWYQTKFQELQSTAFKGGDLKTKTDEIADLSRIVQRIRSEIEI  
VKKAISSLQSLGEABQRGELALKDARTKHELELQTAQVQAKADDLARLLRDYQELNMTKLA  
LDIEIATYRLLLEGE  
>Human\_K1  
EREQIKSLNNQFASFIDKVRKLEQNKVLETKWELLQEQVDTST -- RTHNLEPYFESFINN  
LRRQFDSLGNKNDHLDIEELKNTQELVEDFKNKYEDEINKRTAENDFVLLKQVVDVDSYMH  
KIDLGSKADSLTQYIQLRALFQELTQLHSQV -- KETNVILQMDNDRDL - DLDSIAEV  
KAQYEBIANRSRAEAEAWYQTKFQELQSTAFKGGDLKTKTDEIADLSRIVQRIRSEIEI  
VKKAISSLQSLGEABQRGELALKDARTKHELELQTAQVQAKADDLARLLRDYQELNMTKLA  
LDIEIATYRLLLEGE  
>Human\_K2  
EREQIKTLNNDKVFVSDKVRKLEQNKVLETKWELLQEQMNVGT -- RPINLEPIFQGYIDS  
LRRQFDSLGNKNDHLDIEELKNTQELVEDFKNKYEDEINKRTAENDFVLLKQVVDVDSYMH  
KIDLGSKADSLTQYIQLRALFQELTQLHSQV -- KETNVILQMDNDRDL - DLDSIAEV  
KAQYEBIANRSRAEAEAWYQTKFQELQSTAFKGGDLKTKTDEIADLSRIVQRIRSEIEI  
VKKAISSLQSLGEABQRGELALKDARTKHELELQTAQVQAKADDLARLLRDYQELNMTKLA  
LDIEIATYRLLLEGE  
>Human\_K3  
EREQIKTLNNDKVFVSDKVRKLEQNKVLETKWELLQEQGSSISGTTNNLEPLFENHINY  
LRSYLDNII GERGRLDSELKNMEDLVEDFKNKYEDEINKRTAENDFVLLKQVVDVDSYMH  
KIDLGSKADSLTQYIQLRALFQELTQLHSQV -- KETNVILQMDNDRDL - DLDSIAEV  
KAQYEBIANRSRAEAEAWYQTKFQELQSTAFKGGDLKTKTDEIADLSRIVQRIRSEIEI  
VKKAISSLQSLGEABQRGELALKDARTKHELELQTAQVQAKADDLARLLRDYQELNMTKLA  
LDIEIATYRLLLEGE  
>Human\_K4  
EREQIKLNNKVFASFIDKVRKLEQNKVLETKWELLQEQGTTTT -- SKNLEPLFETYLSV  
LRRQFDSLGNKNDHLDIEELKNTQELVEDFKNKYEDEINKRTAENDFVLLKQVVDVDSYMH  
KIDLGSKADSLTQYIQLRALFQELTQLHSQV -- KETNVILQMDNDRDL - DLDSIAEV  
KAQYEBIANRSRAEAEAWYQTKFQELQSTAFKGGDLKTKTDEIADLSRIVQRIRSEIEI  
VKKAISSLQSLGEABQRGELALKDARTKHELELQTAQVQAKADDLARLLRDYQELNMTKLA  
LDIEIATYRLLLEGE  
>Human\_K5  
EREQIKTLNNDKVFVSDKVRKLEQNKVLETKWELLQEQGTTT -- VRQNLPELFEQYINN  
LRRQFDSLGNKNDHLDIEELKNTQELVEDFKNKYEDEINKRTAENDFVLLKQVVDVDSYMH  
KIDLGSKADSLTQYIQLRALFQELTQLHSQV -- KETNVILQMDNDRDL - DLDSIAEV  
KAQYEBIANRSRAEAEAWYQTKFQELQSTAFKGGDLKTKTDEIADLSRIVQRIRSEIEI  
VKKAISSLQSLGEABQRGELALKDARTKHELELQTAQVQAKADDLARLLRDYQELNMTKLA  
LDIEIATYRLLLEGE  
>Human\_K6B

EREQIKTLNKKFASFDKVRFLQONKVLDTKWTLLQEQGKT--VRQNLPLFEQYINN  
LRRQLDSIVGERGRLDSELRNMQDLVEDLKNKYEDEINKRTAAENEFVTLKKDVAAYMN  
KVELQAKADTLTDEINFLRALYDAELSQMQTHI--SDTSVVLSDMNNRNL-DLDSIIAEV  
KAQYEEIAQRSRABAEASWYQTKYEELQITAGRHGDDLNRNTKQEI AEINRMIQRLRSEIDH  
VKKQCANLQAAIADAEQRGEMALKDANKLEGELEDALQKAKQDLARLLKEYQELMNVKLA  
LDVEIATYRKLLEGE  
>Human\_K6C  
EREQIKTLNKKFASFDKVRFLQONKVLDTKWTLLQEQGKT--VRQNLPLFEQYINN  
LRRQLDSIVGERGRLDSELRNMQDLVEDLKNKYEDEINKRTAAENEFVTLKKDVAAYMN  
KVELQAKADTLTDEINFLRALYDAELSQMQTHI--SDTSVVLSDMNNRNL-DLDSIIAEV  
KAQYEEIAQRSRABAEASWYQTKYEELQITAGRHGDDLNRNTKQEI AEINRMIQRLRSEIDH  
VKKQCASLQAAIADAEQRGEMALKDANKLEGELEDALQKAKQDLARLLKEYQELMNVKLA  
LDVEIATYRKLLEGE  
>Human\_K6A  
EREQIKTLNKKFASFDKVRFLQONKVLDTKWTLLQEQGKT--VRQNLPLFEQYINN  
LRRQLDSIVGERGRLDSELRNMQDLVEDLKNKYEDEINKRTAAENEFVTLKKDVAAYMN  
KVELQAKADTLTDEINFLRALYDAELSQMQTHI--SDTSVVLSDMNNRNL-DLDSIIAEV  
KAQYEEIAQRSRABAEASWYQTKYEELQITAGRHGDDLNRNTKQEI AEINRMIQRLRSEIDH  
VKKQCANLQAAIADAEQRGEMALKDANKLEGELEDALQKAKQDLARLLKEYQELMNVKLA  
LDVEIATYRKLLEGE  
>Human\_K7  
ESEQIKTLNKKFASFDKVRFLQONKLETKWTLLQEQKSAAK---SSRLPDIFEQYIAG  
LRGQLEALQVDDGGRLAEALRSMQDVVEDFKNKYEDEINHRTAAENEFVTLKKDVAAYMS  
KVELEAKVDALNDEINFLRTELNETELQSQI--SDTSVVLSDMNNRNL-DLDSIIAEV  
KAQYEEIAQRSRABAEASWYQTKFETLQAQAGKHGDDLNRTRNEISEMNRMIQRLRSEIDH  
IKNQRAKLEAAIAEAEERGELALKDARAKQEELEAALQQRQDMARQLREYQELMSVKLA  
LDIEIATYRKLLEGE  
>Human\_K8  
EKEQIKTLNKKFASFDKVRFLQONKLETKWLLQEQKTT---ARSNDNMFESYINN  
LRRQLETLGQEKLEBAELGNMQLVEDFKNKYEDEINKRTAENEFVTLKKDVAAYMN  
KVELESRLLEGLTDEINFLRQLYEEIEIRELQSQI--SDTSVVLSDMNNRNL-DLDSIIAEV  
KAQYEDIANRSRABAEASWYQTKYEELQSLAGKHGDDLNRTRNEISEMNRMIQRLRSEIDH  
LKGQRASLEAAIADAEQRGELAIKDNANKLEGELEAALQQRQDMARQLREYQELMSVKLA  
LDIEIATYRKLLEGE  
>Human\_K71  
EREQIKALNKKFASFDKVRFLQONQVLETKWELLQQLDLN--CKNNLEPILEGYISN  
LRKQLETLGSDRVRLDSELRNVRDVEDYKRYEIEINKRTAAENEFVTLKKDVAAYAN  
KVELQAKVESMDQEI KFFRCLFEAEITQIQSHI--SDMSVVLSDMNNRNL-DLDSIIDEV  
RTQYEEIALKSKAEAEALYQTKFQELQLAGRHGDDLNRKNEISELTRLIQRIRSEIEN  
VKKQANLETAIADAEQRGDALKDARAKLDELEGALHQAEEELARMLREYQELMSKLA  
LDMEIATYRKLLESE  
>Human\_K72  
EREQIKALNKKFASFDKVRFLQONQVLETKWLLQQLDLN--CRKNLEPILEGYISN  
LQKQLEMLSGDVRLDSELRNMQDLVEDYKRYEIEINKRTAAENEFVTLKKDVAAYMN  
KVELQAKVDSLTDIEIKFFKLYEGEITQIQSHI--SDTSIVLSDMNNRNL-DLDSIIAEV  
RAQYEEIALKSKAEAEALYQTKIQELQVTAQGHGDDLKTKAEISELNRLIQRIRSEIGN  
VKKQCADLETAIADAEQRGDALKDARAKLDELEGALHQAEEELARMLREYQELVSKLA  
LDMEIATYRKLLESE  
>Human\_K73  
EREQIKVNLNKKFASFDKVRFLQONQVLETKWELLQQLDLN--CKNNLEPILEGYISN  
LRKQLETLGSDRVRLDSELRNVRDVEDYKRYEIEINKRTAENEFVTLKKDVAAYTS  
KVELQAKVDALDGEIKFFKLYEGETAQIQSHI--SDTSIILSDMNNRNL-DLDSIIAEV  
RAQYEEIARKSKAEAEALYQTKFQELQLAGRHGDDLKHTKNEISELTRLIQRIRSEIES  
VKKQCANLETAIADAEQRGDALKDARAKLDELEGALHQAEEELARMLREYQELLSVKLS  
LDIEIATYRKLLESE  
>Human\_K74  
EREQIKVNLNKKFASFDKVRFLQONQVLETKWELLQQLDLN--CKNNLEPILEGYISN  
LRKQLETLGSDRVRLDSELRNMRDVEDYKRYEIEINKRTAENEFVTLKKDVAAYAV  
KVELQAKVDSLTDKIEIKFKLYEGETAQIQSHA--SETSVLSDMNNRNL-DLDSIIAEV  
RMHYEEIALKSKAEAEALYQTKIQELQLAASRHGDDLKHTRSEMVELNRLIQRIRCEIGN  
VKKQASLETAIADAEQRGDALKDQAQKLELEGALHQAEEELARMLREYQELMSKLA  
LDMEIATYRKLLESE  
>Human\_K75  
EREQIKTLNKKFASFDKVRFLQONKVLDTKWTLLQEQGRT--VRQNLPLFDSYTS  
LRRQLESITTEGRLEBAELRNMQDVVEDFKVRYEDEINKRTAAENEFVTLKKDVAAYMN  
KVELEAKVKSLEPEEINFHSVFDLQELQV--GDTSVLSDMNNRNL-DLDSIIAEV  
KAQYEDIANRSRABAEASWYQTKYEELQVTAGRHGDDLNRNTKQEI SEMNRMIQRLRSEIDS  
VKKQCSLQTAIADAEQRGELALKDARAKLVDLEALQKAKQDMARLLREYQELMNIKLA  
LDVEIATYRKLLEGE  
>Human\_K76  
EREQIKTLNKKFASFDKVRFLQONKVLDTKWTLLQEQGTTGS--GPSLEPCFESYISF  
LCKQLDSSLGERGNLEGEKSMQDLVEDFKKRYEDEINKRTAAENEFVTLKKDVAAYMN  
KVELQAKVDSLTDVSEFLRFLYEMELSQMQSHA--SDTSVVLSDMNNRNL-DLDSIIAEV  
RAQYEEIAQRSKAEAEALYQTKLQELQVTAQGHGDDLNRNTKSEIMELNRLIQRIRSEIEN  
VKKQANLQTAIAEAEQRGEMALKDANKLQDLQALQKAKQDLARLLRDYQELMNVKLA  
LDVEIATYRKLLEGE  
>Human\_K77  
EREQIMVNLNKKFASFDKVRFLQONQVLETKWELLQQLVNTST--GTNNLEPLLENYIGD  
LRRQVLLSABEQMRQNAEVRSMQDVVEDYKSKYEDEINKRTGSENFVTLKKDVAAYVS  
KVDLESRVDTLTGEVNFYKLYFLTELQVQTHI--SDTNVLSMNNRNL-DLDSIIDAV  
RTQYEEIAQRSKAEAEALYQTKYQELQITAGRHGDDLKNSKMEIAELNRTVQRLQAEISN  
VKKQIEQMOSLISDAEERGEQALQDAWKLQDLQLEALQSQKEELARLLRDYQAMLVKLS  
LDVEIATYRQLLEGE  
>Human\_K78  
ETQEIRTLNNQFASFDKVRFLQONKVLDTKWHLLQEQGLSG--SQQGLEPVFEACLQ  
LRKQLEQLQGERGALDAELKACRDQEEYKSKYEEEAHRRATLENFVTLKKDVGDFLS  
KMELEKLEALREYLYFLKHLNEEELGQLQTA--SDTSVVLSDMNNRNL-DLDSIITEV  
RAREYEEIARSKAEAEALYQTKYQELQVSAQLHGDRMQETKQVLSQLHQEIQRLQSQTEN  
LKKQNASLQAAITDAEQRGELALKDAQKVDLEAALRMAKQNLARLLCEYQELTSTKLS  
LDVEIATYRRLLEGE  
>Human\_K79  
EREQIKTLNKKFASFDKVRFLQONKVLDTKWTLLQEQGQNLGVTRNNLEPLFEAYLGS  
RMDLDRQLSERGRLDSELRNMQDLVEDFKNKYEDEINKRTAAENEFVTLKKDVAAYMG  
RMDLHGKVTLTQEIIDLQLYEMELSQVQTHV--SNTNVLSMNNRNL-DLDSIIAEV  
KAQYELIAQRSRABAEASWYQTKYEELQVTAQGHGDDLNRDTRNEIAELTRTIQRLQGEADA  
AKKQCQLQTAIAEAEQRGELALKDAKQKLGDLVALHQAEDLTRLRLDYQELMNVKLA  
LDVEIATYRKLLESE  
>Human\_K80  
EKEEMKALNDKFAFLIGKVALEQRNQLLETRWSFLQGDQSAI---FDLGHLYEYQGR  
LQBELRKSQSERGQLEANLLQVLEKVEEPRIRYEDIEIKRTDMEFTFVQLKKDLDAECLH  
RTELETKLSLESFVBLMKTIEYQELKDLAAQV--KDVSVTVGMDSRCHI-DLSGIVEEV  
KAQYDAVAARSLEAEASRSQLEEQAAARSAYGSSLSQSRSEIADLNVRIQKLRSQLS  
VKSHCKLEENIKTAEQGEALFQDAKTKLAQLEAALQKAKQDMARQLRKYQELMNVKLA  
LDIEIATYRKLVEGE



```

>Human_K81
EKEQIKSLNSRFAAFIDKVRFLQEQNKLETKLQFYQNREC----CQSNLEPLFEGYIET
LRREACVEADSGRLASELNHVQEVLEGYKKYEEVSLRATAENEFVALKKDVCAYLR
KSDLEANVEALIQEIDFLRRLYEELILQSHI--SDTSVVVKLDNSRDL-NMDCIIAEI
KAQYDDIVTRSRAEAEBSWYRSKCEEMKATVIRHGETLRRTKEEINELNRMIQRLTAEVEN
AKCQNSKLEAAVAQSEQQGEAALSDARCKLAELGALQKAKQDMACLIREYQEVMSKLG
LDIEIATYRRLLEGE
>Human_K82
EKEQIKCLNRRFASFINKVRFLQEQNKLETKWNFMQQQRC----CQTNIEPIFEGYISA
LRRQLDCVSGDRVRLESELCSLQAALQEGYKKYEEELSLRRCVENEVVALKKDVTAFML
KADLETNAEALVQEIIDFLRRLYEELICLLQSQI--SETSVIVKMDNSRDL-DVDGIIAEI
KAQYDDIATRSRAEAEBSWYRSKCEEMKATVIRHGETLRRTKEEINELNRMIQRLTAEVEN
VKAQRCKLEGAIAEAEQQGEAALNDACKLAGLEALQKAKQDMACLLKEYQEVMSKLG
LDIEIATYRRLLEGE
>Human_K83
EKEQIKSLNSRFAAFIDKVRFLQEQNKLETKLQFYQNREC----CQSNLEPLFAGYIET
LRREACVEADSGRLASELNHVQEVLEGYKKYEEVLRATAENEFVALKKDVCAYLR
KSDLEANVEALIQEIDFLRRLYEELIRILQSHI--SDTSVVVKLDNSRDL-NMDCIVAEI
KAQYDDIATRSRAEAEBSWYRSKCEEMKATVIRHGETLRRTKEEINELNRMIQRLTAEVEN
AKCQNSKLEAAVAQSEQQGEAALSDARCKLAELGALQKAKQDMACLIREYQEVMSKLG
LDIEIATYRRLLEGE
>Human_K84
EKEQIKTLNKKFASFIDKVRFLQEQNKLETKWSFLQEQKC----IRSNLEPLFESYITN
LRRQLEVLVSDQARLQAERNHLQDVLEGFKKYEEVVCRAANAENEFVALKKDVAAPFN
KSDLEANVDTLTQEIIDFLKTLYMEELQLQSHI--SETSVIVKMDNSRDL-NLDGIIAEV
KAQYEEVARRSRADAEAWYQTKYEEMQVTAGQHCNDLNRNIRNEINELRLIQRLKAEIEH
AKAQRAKLEAAVAEAEQQGEATLSDACKLADLECALQKAKQDMARQLCEYQELMNAKLG
LDIEIATYRRLLEGE
>Human_K85
EKEQIKSLNSRFAAFIDKVRFLQEQNKLETKWQFYQNRC----CESNLEPLFSGYIET
LRREACVEADSGRLASELNHVQEVLEGYKKYEEVLRATAENEFVVLKKDVCAYLR
KSDLEANVEALVEESSFLRRLYEELIRVLQSHI--SDTSVIVKMDNSRDL-NMDCIIAEI
KAQYDDVARSRAEAEBSWYRSKCEEMKATVIRHGETLRRTKEEINELNRMIQRLTAEIEN
AKCQRAKLEAAVAEAEQQGEAALSDARCKLAELGALQKAKQDMACLLKEYQEVMSKLG
LDIEIATYRRLLEGE
>Human_K86
EKEQIKSLNSRFAAFIDKVRFLQEQNKLETKLQFYQNREC----CQSNLEPLFEGYIET
LRREACVEADSGRLASELNHVQEVLEGYKKYEEVSLRATAENEFVALKKDVCAYLR
KSDLEANVEALIQEIDFLRRLYEELIRVLQSHI--SDTSVVVKLDNSRDL-NMDCIIAEI
KAQYDDIVTRSRAEAEBSWYRSKCEEMKATVIRHGETLRRTKEEINELNRMIQRLTAEVEN
AKCQNSKLEAAVAQSEQQGEAALSDARCKLAELGALQKAKQDMACLIREYQEVMSKLG
LDIEIATYRRLLEGE

```

**Suppl. Fig. S13. Amino acid sequence alignment of the intermediate filament domains of type II keratins used for the phylogenetic analysis shown in Figure 4. The multiple sequence alignment is shown in fasta\_aln format.**

>Frog2\_K80  
EEAETK-LRAALATFNDKIRYLEKQREIILESRLW-SMIQTTEE-----TTQ-TDLEPQ--Y  
LSYISRLLEGEVKNVTQNNHQTRQLLDMMDSDVNDMDKDFEDELFRRTDVEYSFVLEKDDA  
DGRSLEQTELETRKQDIKEMIDLMTVYKQELKELM-EDS--GDISVLVNM-EQSCPLNL  
DKVVEVKAQYERIASWSRDEAQAALSKNKLAEQVQRVGRYELELKSRSRSEITHLNSKIQR  
LRSEIQSIQKQCSKLEQDVSLAQTSNSNMAIVDANTKVTEIQDVLKAKQDMARQLREYQE  
LLHVKMALDVEIAAYNLLL-EGE  
>Frog2\_K7  
EREQIKTLNNKFASFIDKVRFLQONKQVLETKW-ELLQONQKS-----AKA-SNVGPL--F  
DAYIANLRQLDGLTGDKGKLEGELELRNQDQVDFPKNKYEDEINKRTSAENEFVVLKDDV  
DAAYMKNVLEAKMEALDTEINFLRALYEAELELQ-EQI--SDTSVVLVSM-NNRALDL  
DSIIAEVKAQYEDIANSRANAEAVYQNKQELQATAGRHGDDLRTTKTEISELNRAMQR  
LQAEIESVKAQRAKLEAQIAEAEERGERLALDKARTKLALEEAALQKAKQDMARQLREYQE  
LMNVKALDIEIATYRKLL-EGE  
>Frog2\_03  
EKEQIKTLNNKFASFIDKVRFLQONKQVLETKW-AILLQEQR-----TAR-SHIEPL--F  
EAYIGNLRQLDCLLGEKSRLEGERKNMEDIVEDPKNKYEDEEVNRRTTAENEFVVLKDDV  
DAAPLHKAELEQTRVESQTDDEVNFRMTFAEIAQLQ-GQI--SDTSVVLVSM-NNRALDL  
DGIIEAVKAQYEDIANSRANAEAVYQNKQELQATAGRHGDDLRTTKTEISELNRAMQR  
LRGEIETVNAQRGKLEGAITEAEERGERMATKDAKKLADLEEGKQKAKQDMARQLREYQE  
LMNVKALDIEIATYRKLL-EGE  
>Frog2\_04  
EREQIKTLNNKFASFIDKVRFLQONKQVLETKW-NLLQEQGVK---SVK-CNIDPL--F  
EAYISALRQLDLSLSEKVRLLDQLQMDQVDFPKNKYEDEINKRTSAENEFVVLKDDV  
DAAYMKNVLEAKLALDTEINFLRAVYEAELQMQ-TQI--SDTSVVLVSM-NNRALDL  
NGIIAEVKAQYEDIANSRANAEAVYQNKQELQATAGRHGDDLRTTKTEISELNRAMQR  
LRSEIDSVKQCAKLAQAITEAEERGERLALDKDAKKLADLEEGKQKAKQDMARQLREYQE  
LMNVKALDIEIATYRKLL-EGE  
>Frog2\_05  
EREQIKTLNNKFASFIDKVRFLQONKQVLETKW-SLLQEQGVK---SRK-NNIDPI--F  
DAYINSLRQLDLDLQNDKRLDGLERMQDQVDFPKNKYEDEINKRTSAENEFVVLKDDV  
DAAYMKNVLEAKLALDTEINFLRAVYEAELQMQ-TQI--SDTSVVLVSM-NNRALDL  
ESIIAEVKAQYEDIANSRANAEAVYQNKQELQATAGRHGDDLRTTKTEISELNRAMQR  
LKAIEENVKQIAKLAQAITEAEERGERLALDKDAKKLADLEEGKQKAKQDMARQLREYQE  
LMNVKALDIEIATYRKLL-EGE  
>Frog2\_06  
EREKIKTLNNKFASFIDKVRFLQONKQVLETKW-SLLQEQGVK---SRK-NNIDPI--F  
NTLITSLRQLDLSLVKDGKLEGELELRNQDQVDFPKNKYEDEINKRTSAENEFVVLKDDV  
DATYLIVQLETKQKALDDELAFLRNLYKEELDGKIK-QQT--AGTSVVLVSM-NNRALDL  
DGIIEAVKAQYEDIANSRANAEAVYQNKQELQATAGRHGDDLRTTKTEISELNRAMQR  
LKAIEENVKQIAKLAQAITEAEERGERLALDKDAKKLADLEEGKQKAKQDMARQLREYQE  
LMNVKALDIEIATYRKLL-EGE  
>Frog2\_07  
EREQIKTLNNKFASFIDKVRFLQONKQVLETKW-ELLQEQGVK---SRK-NNIDPI--F  
EAYISNLRRSLDLSLNDKRLDGLERMQDQVDFPKNKYEDEINKRTSAENEFVVLKDDV  
DGAYMKNVLEAKLALDTEINFLRAVYEAELQMQ-TQI--SDTSVVLVSM-NNRALDL  
DGIIEAVKAQYEDIANSRANAEAVYQNKQELQATAGRHGDDLRTTKTEISELNRAMQR  
LKAIEENVKQIAKLAQAITEAEERGERLALDKDAKKLADLEEGKQKAKQDMARQLREYQE  
LMNVKALDIEIATYRKLL-EGE  
>Frog2\_08  
ERDQIKTLNNKFASFIDKVRFLQONKQVLETKW-NFLQEQGVK---SRK-NNIDPI--F  
DAYITNLQRQLEGLRSEKCRLDGELKMQDQVDFPKNKYEDEINKRTSAENEFVVLKDDV  
DILYMKKAELEAKESLGNELNFRNIFDAELAEQ-DCL--SDINVLVSM-NNRALDL  
NGLIAEAVKAQYEDIANSRANAEAVYQNKQELQATAGRHGDDLRTTKTEISELNRAMQR  
LQSEIECVKQIAGLQAAICDAESRGEATLKDANCKMSELEAVLQKAKEDLAIQLREYQE  
LLRVKALDVEIATYRLL-EGE  
>Frog2\_09  
ERDQIKTLNNKFASFIDKVRFLQONKQVLETKW-NFLQEQGVK---SRK-NNIDPI--F  
DAYITNLQRQLEGLRSEKCRLDGELKMQDQVDFPKNKYEDEINKRTSAENEFVVLKDDV  
DVLVYMKKAELEAKESLGNELNFRNIFDAELAEQ-DCL--SDINVLVSM-NNRALDL  
NGLIAEAVKAQYEDIANSRANAEAVYQNKQELQATAGRHGDDLRTTKTEISELNRAMQR  
LQSEIECVKQIAGLQAAICDAESRGEATLKDANCKMSELEAVLQKAKEDLAIQLREYQE  
LLRVKALDVEIATYRLL-EGE  
>Frog2\_10  
EREQIKTLNNKFAAYIDKVRFLQONKQVLETKW-KLLQEQGVK---SRK-NNIDPI--F  
EKYIGDLRRLYDLTLINEKGSLEHELNKQDQVDFPKNKYEDEINKRTSAENEFVVLKDDV  
DTAYMANRELEAKADGVTSEINFLRFLYAEELQVQV-DSV--TNTSVVLVSM-NNRALDL  
EGIIQEVKAQLELSAQRSMKMEAEALYDNKYKELQRTAEGHGDSDIKNSKSEIAELNRRIQR  
LKAIEENVKQIAKLAQAITEAEERGERLALDKDAKKLADLEEGKQKAKQDMARQLREYQE  
LLAAKISLDVEIATYRLL-EGE  
>Frog2\_11  
EREQIKTLNNKFAAYIDKVRFLQONKQVLETKW-KLLQEQGVK---SRK-NNIDPI--F  
EKYIGDLRRLYDLTLINEKGSLEHELNKQDQVDFPKNKYEDEINKRTSAENEFVVLKDDV  
DAFMAKTLEAKADGVTSEINFLRFLYAEELQVQV-DSV--TNTSVVLVSM-NNRALDL  
SGIIQEVKAQLELSAQRSMKMEAEALYDNKYKELQRTAEGHGDSDIKNSKSEIAELNRRIQR  
LRAEIEENKQIAKLAQAITEAEERGERLALDKDAKKLADLEEGKQKAKQDMARQLREYQE  
LLAAKISLDVEIATYRLL-EGE  
>Frog2\_12  
EREQIKTLNNKFAAYIDKVRFLQONKQVLETKW-KLLQEQGVK---SRK-NNIDPI--F  
EKYIGDLRRLYDLTLINEKGSLEHELNKQDQVDFPKNKYEDEINKRTSAENEFVVLKDDV  
DAAYMKTLEAKADGVTSEINFLRFLYAEELQVQV-DSV--TNTSVVLVSM-NNRALDL  
EGIIQEVKAQLELSAQRSMKMEAEALYDNKYKELQRTAEGHGDSDIKNSKSEIAELNRRIQR  
LRAEIEENKQIAKLAQAITEAEERGERLALDKDAKKLADLEEGKQKAKQDMARQLREYQE  
LLAAKISLDVEIATYRLL-EGE  
>Frog2\_13  
EREQIKTLNNKFAAYIDKVRFLQONKQVLETKW-KLLQEQGVK---SRK-NNIDPI--F  
EKYIGDLRRLYDLTLINEKGSLEHELNKQDQVDFPKNKYEDEINKRTSAENEFVVLKDDV  
DTVMKATLEAKADGVTSEINFLRFLYAEELQVQV-DSV--TNTSVVLVSM-NNRALDL  
EGIIQEVKAQLELSAQRSMKMEAEALYDNKYKELQRTAEGHGDSDIKNSKSEIAELNRRIQR  
LRAEIEENKQIAKLAQAITEAEERGERLALDKDAKKLADLEEGKQKAKQDMARQLREYQE  
LLAAKISLDVEIATYRLL-EGE  
>Frog\_K8  
EKEQIKTLNNKFASFIDKVRFLQONKQVLETKW-SLLQEQR-----TAR-SHIEPL--F  
EAYIGNLRQLDGLTGDKGKLEGELELRNQDQVDFPKNKYEDEINKRTSAENEFVVLKDDV  
DAAYMKNVLEAKMEALDTEINFLRALYEAELELQ-EQI--SDTSVVLVSM-NNRALDL  
DSIIAEVKAQYEDIANSRANAEAVYQNKQELQATAGRHGDDLRTTKTEISELNRAMQR  
LQAEIESVKAQRAKLEAQIAEAEERGERLALDKARTKLALEEAALQKAKQDMARQLREYQE  
LMNVKALDIEIATYRKLL-EGE  
>Chicken\_K80  
EKEDIKTLNNQFVTLIEKVCLEQONKILTTTR-NFLKQDQNS---HSE-SDVKAI--Y  
DQYMSKMNQEMQALNVEQENLESELTEVLSMDNFRSKYEDEIRLCSGMEYTFMELKDDL  
DASTLHRTLEVEKLSGLQELMDLKKTIYQELLELL-TEI--KDISVVLGID-NTCKLDDL  
SRIVEVRAQYEAALALRSWEAEALTRKLNENGTQSATYGGHLLDSRREIADLNIQIQK  
LRSCIVSQKSQCLYLEENKEAGHEGMALKDAKAKLVLEALQKSKEDMAHLVKEYQE

LMNKLALDLLEILTYRKLIV-EGE  
>Chicken\_K7  
EKEQIKTLNRRFASFDKVRFLQEQNKMLETKW-SLLQDQK-----TTR-SNIVPM--F  
EAYITNLRRLQDLGLLNDKGRLEGLERLNMQDLVDFKAKYEDIEINKRRTAENEFVVLKDDV  
DAAYMKNVLEAKVDALDEINFLRSLYAEALRELQ-AQI--SDTSVVLVSM-DNSRNLDL  
DSIIAEVKAQYEDIANRSRAEAEAWYQSKFEALQVTAGKHGDDLRTNKNEITEINRVIQR  
LQGEIENAKAQRAMEAAIAEAEERGERLAVKDARAKLEEAALQKAKQDMARQLREYQE  
LMNVKLALDIEIATYRKLIV-EGE  
>Chicken\_K84L  
EKEQIKTLNRRFASFDKVRFLQEQNKMLETKW-SFLKQK-----HGR-NTIVPM--L  
EACIGNLKKQLEALGCRNARLETOLKAVQEALETNKKIYEDERSRRSSTEKELIALKDDV  
ECCFLNKAELGAKVGRMEGEGFLRVLVYEEESQQLR-AHI--SDTAVVQMD-NSWDPNL  
DGIIVANVKAHYEDTACRSRAETEAWCKGKFKELQVTAGRNADSLQEKKEAAELARMVKK  
LSGVEVRSKQCKLETAVADAEQRKEMSIKDAKSKLLEEAALQKAKQDLARQLWEFQE  
LMNKLALDVEITTYRKLIV-EGE  
>Chicken\_K5L3  
EKEQIKTLNRRFASFDKVRFLQEQNKMLETKW-ALLQEQGHK----TVR-NNIEPL--F  
EAYINLRRLQDLGLLNDKGRLEGLERLNMQDLVDFKAKYEDIEINKRRTAENEFVVLKDDV  
DSTYMTKTELQARLDALLEIDFLRALYAEALSQQL-SQI--ADTSVILVMD-NNSRLDM  
DSIIAEVKAQYEDIANRSRAEAEAWYQSKFEALQVTAGKHGDDLRTNKNEITEINRVIQR  
LRAEIDSVKQKQASLQTAIADAEQRGELALKDARDKLALETALQKAKADLARQLREYQE  
LMNVKLALDIEIATYRKLIV-EGE  
>Chicken\_K5L2  
EKEQIKTLNRRFASFDKVRFLQEQNKMLETKW-SLLQEQGMK----TVR-NNLEPL--F  
ETYINLRRLQDLGLLNDKGRLEGLERLNMQDLVDFKAKYEDIEINKRRTAENEFVVLKDDV  
DASYMKNVLEAKADALTEEINFLRALYAEALSQMQ-TQI--SDTSVVLVMD-NNSRLDL  
DSIIAEVKAQYEDIANRSRAEAEAWYQSKFEALQVTAGKHGDDLRTNKNEITEINRVIQR  
LRAEIDSVKQKQCANLKAADAEERGERIALKDAKAKLALEEDALQKAKADLARQLREYQE  
LMNVKLALDIEIATYRKLIV-EGE  
>Chicken\_K5L1  
EREQIKTLNRRFASFDKVRFLQEQNKMLETKW-SLLQEQGHT----VTR-KSLEPL--F  
ETYINLRRLQDLGLLNDKGRLEGLERLNMQDLVDFKAKYEDIEINKRRTAENEFVVLKDDV  
DGAYMKNVLEAKADGLADEINFLRALYAEALSQMQ-QVQ--SDTSVVLVMD-NNSRLDL  
NSIIAEVKAQYEDIANRSRAEAEAWYQSKFEALQVTAGKHGDDLRTNKNEITEINRVIQR  
LRNEIEVSKKQCANLKAADAEERGERIALKDAKAKLALEEDALQKAKADLARQLREYQE  
LMNVKLALDIEIATYRKLIV-EGE  
>Chicken\_HBS1  
EKEQIKTLNRRFASFDKVRFLQEQNKMLETKW-ELLQYVLP----ASR-RNLEPV--F  
ENYICDLRRLQDLGLLNDKGRLEGLERLNMQDLVDFKAKYEDIEINKRRTAENEFVVLKDDV  
DCLVTKLEELVVRVGLRQLEFLKCIYAEERAQMD-CQL--CDTSVIVQMD-NSRDLDM  
EGIIKSVVECCYEEIAQKSKAEVAFYQTRLEELHSSRKGFCDDLNNQSEIAELNRMIOK  
LQCESDNVKKQIAALQTAICDAEQRGDCALKDARQKLVLDLQALQKAKDMLRLLRYQE  
LMNVKLALDIEIATYRKLIV-EGE  
>Chicken\_HBS2  
EKEQIKTLNRRFASFDKVRFLQEQNKMLETKW-GLLQYVLP----KKG-KNLELY--F  
ENYICDLRRLQDLGLLNDKGRLEGLERLNMQDLVDFKAKYEDIEINKRRTAENEFVVLKDDV  
DCIFLNKEELVVRVGLRQLEFLKCIYAEERAQMD-CQL--CDTSVIVQMD-NSRDLDM  
ESIINKVVECWYQEEIAQKSKAEVAFYQTRLEELHSSRKGFCDDLNNQSEIAELNRMIOK  
LQCELENVKKQVSLQTSICDVEQRGDCALKDARQKLVLDLQALQKAKDMLRLLRYQE  
LMNVKLALDIEIATYRKLIV-EGE  
>Chicken\_HBS3  
EREQMSLNRRFASFDKVRFLQEQNKMLETKW-AFLQKHIL----PSQ-KNFKHV--F  
NTFICSLRRLQDLGLLNDKGRLEGLERLNMQDLVDFKAKYEDIEINKRRTAENEFVVLKDDV  
DCVYLTKLEELVVRVGLRQLEFLKCIYAEERAQMD-CQL--CDTSVIVQMD-NSRDLDM  
EGILRGIELWYEDVAQKSKAEVAFYQTRLEELHSSRKGFCDDLNNQSEIAELNRMIOK  
WQCDLENVKKRVSLRSTVSDTEQRGDCALKDARQKLVLDLQALQKAKDMLRLLRYQE  
LMNVKLALDIEIATYRKLIV-EGE  
>Chicken\_K78LT  
EKEQIKTLNRRFASFDKVRFLQEQNKMLETKW-ELLQYVLP----EES-RSITSF--F  
QSYINLRRLQDLGLLNDKGRLEGLERLNMQDLVDFKAKYEDIEINKRRTAENEFVVLKDDV  
DSTYMRKMEFVVRVILKQLEFLRCLYAEALSQQL-TVV--DNTNVLVMD-NGREVNMD  
DGIIEVVRQYEQIAQNSRAEAEAWYQSKFEALQVTAGKHGDDLRTNKNEITEINRVIQR  
LQPEIEIVRRENDSRQEAIRDAEQRGSAVKGQKQLQLEENALQQAEDLARILHLYQE  
LLNAKLSLDVBIAMYSLL-EEE  
>Chicken\_K78L4  
EKEQIKTLNRRFASFDKVRFLQEQNKMLETKW-ELLQYVLP----GPR-KNLDVI--F  
ENYIQLRRLQDLGLLNDKGRLEGLERLNMQDLVDFKAKYEDIEINKRRTAENEFVVLKDDV  
DCAYMTKVELEAKVGALTEISFLRCIYEEELAQM-Q-TIS--RDLVSVVSM-DNSRHLDM  
DSIIAEVVRQYEQIAQNSRAEAEAWYQSKFEALQVTAGKHGDDLRTNKNEITEINRVIQR  
LRAEINVKKQNLQAAIAEAEERGERMALKDARVKKLEEAALSKDKKEELARLLKRYQE  
LLNKLALDVEIATYRKLIV-EGE  
>Chicken\_K78L3  
EKEQIKTLNRRFASFDKVRFLQEQNKMLETKW-ELLQYVLP----GPR-KNLDVI--F  
ENYIQLRRLQDLGLLNDKGRLEGLERLNMQDLVDFKAKYEDIEINKRRTAENEFVVLKDDV  
DCAYMTKVELEAKVGALTEISFLRCIYEEELSQQMQ-TIS--RDLVSVVSM-DNSRHLDM  
DSIIAEVVRQYEQIAQNSRAEAEAWYQSKFEALQVTAGKHGDDLRTNKNEITEINRVIQR  
LRAEINVKKQNLQAAIAEAEERGERMALKDARVKKLEEAALSKDKKEELARLLKRYQE  
LLNKLALDVEIATYRKLIV-EGE  
>Chicken\_K78L2  
EKEQIKTLNRRFASFDKVRFLQEQNKMLETKW-ELLQYVLP----GPR-KNLDVI--F  
ENYIQLRRLQDLGLLNDKGRLEGLERLNMQDLVDFKAKYEDIEINKRRTAENEFVVLKDDV  
DTAYMTKVELEAKVGALTDQINFLRAIYEEELSQQMQ-TIS--RDLVSVVSM-DNSRHLDM  
DSIIAEVVRQYEQIAQNSRAEAEAWYQSKFEALQVTAGKHGDDLRTNKNEITEINRVIQR  
LRAEINVKKQNLQAAIAEAEERGERMALKDARVKKLEEAALSKDKKEELARLLKRYQE  
LLNKLALDVEIATYRKLIV-EGE  
>Chicken\_K78L1  
EREELKTLNRRFASFDKVRFLQEQNKMLETKW-KLLQEQSPT----TST-RSLDPY--F  
EAYISRLRQLDGLSSEKIQLESELKSFQDMVDFKAKYEDIEINKRRTAENEFVVLKDDV  
DGYMKNVLEAKLDSLADLFLNRLYETELCQM-Q-TV--SDTSVVLVMD-NNSRDLDM  
DSIIAEVKAQYEEIANRSRAEAEAWYQSKFEALQVTAGKHGDDLRTNKNEITEINRVIQR  
LRAEINVKKQNSVQSIADAEQRGELALKDARDKLALETALQKAKADLARQLREYQE  
LMNVKLALDIEIATYRKLIV-EGE  
>Chicken\_K8  
EKEQIKTLNRRFASFDKVRFLQEQNKMLETKW-SLLQSQ-----PQR-SDLRGL--F  
EGYVGLRRLQDLGLLNDKGRLEGLERLNMQDLVDFKAKYEDIEINKRRTAENEFVVLKDDV  
DEAYMKNVLEAKLDSLADLFLNRLYETELCQM-Q-TQI--SDTSVVLVMD-NNSRDLDM  
DSIIAEVKAQYEDIANRSRAEAEAWYQSKFEALQVTAGKHGDDLRTNKNEITEINRVIQR  
IQAEIEVLKNQRATLETAIAEAEERGERMALKDARAKLALEEAALQKAKQDLARQLREYQE  
LMNVKLALDIEIATYRKLIV-EGE  
>Alligator\_K80  
EKEEIKVLRNRRFASFDKVRFLQEQNKMLETKW-DPLKQDQNS----SSE-VDIKCI--Y  
DEYMGMEQEMKSIDQEEKELESELTKVLDSMDDFRAYEGEMQLRNSLEYTFLELKKDL  
DAGTLHRTLEEVKLNGLQEHMELKKSVEYQELQELL-AEV--KDISVVLGID-TRCNLDM  
HSIVEVRAQYEAALAVWSKKEAEAHISKLNEGVPVSAMYGHNLFNSRREIADLNIQIQK

LRSCIVSLKSQLSLEESIKEAGEQGFALQDASAKLASLEALQKKGEDVTHLVKEHQ  
LMNTKLALDVEILTYRKLIV-EGE  
>Alligator\_K7  
EKEQIKTLNKKFASFDKVRFLQONKMLETKW-SLLQDQK-----TAR-SNIAPL--F  
EAYISNLRQLDGLMNDKGRLEGLKMNQDLVDFPKNKYEDEINRRTAENEFVVLKDDV  
DCAYMKNVLEAKVVDALTDENFLRSLYEAELQELQ-TQI--SDTSVVLQMD-NSRNLDL  
DSIIAEVKAQYEDIANSRRAEAESWYQSKFEVLQATAGKHGDDLRSTKNEIAETNRMIMR  
LQSEIDNVKQRAKLEAAIAEAERGERMAIKDARAKQDELEAALQKAKQDMARQLREYQD  
LMNVKALDIEIATYRKLIV-EGE  
>Alligator\_K84L1  
EKEQIKTLNKKFASFDKVRFLQONKMLETKW-SFLQOQK-----CRR-NTIMPT--L  
DAYICNLRQLQLEALGCEGQLEADLKAHEVMEETNKKMYEESRRTCAENEFVVLKKEV  
DCVFLNKAELRVARVESLKDEIIFLKSLEYEEIHMLH-SHI--SDTSVIVQMD-NSRNLDL  
DGIITTEVKAQYEDIANSRRAEAESWYQSKFEELRVTAGRHADNLRDTKNEIAELTRIQR  
LRGEVGTAKDQRCKLEAAVAEAEEQGGELAIAKDARCKLTDLETALQKAKADLAHQLRREYQ  
LMNVKALDIEIATYRKLIV-EGE  
>Alligator\_K84L2  
EKEQIKTLNKKFASFDKVRFLQONKMLETKW-RFLQEQK-----RYK-SNIEPM--F  
EAYISNLRQLQLEVLGDRAKLETSLNMQDLEDFKKEKYEESRRTCAENEFVVLKDDV  
DCAYMKNVLEAKVVDALTDENFLRSLYEAELQELQ-TQI--SDTSVIVQMD-NSRNLDL  
DSIIAEVKAQYEDIANSRRAEAESWYQSKFEELRQTAGKHSDKLRNTKNEIMELSRVQR  
LNGELENAKQGRKLEAAIAEAERGERMALKDAKCKLTDLEAALQKAKQDMACQLREYQ  
LMNVKALDIEIATYRKLIV-EGE  
>Alligator\_K5L4  
EKEQIKTLNKKFASFDKVRFLQONKMLETKW-SLLQEQK-----TAR-SNIEPM--F  
EAYISNLRQLQLEVLGDRGRLDELKGMQDVEDFRIRYEDIEHKRTAENEFVVLKDDV  
DCAYMKNVLEAKVVDALTDENFLRSLYEAELQELQ-TQI--SDTSVIVQMD-NSRNLDL  
DSIIAEVKAQYEDIANSRRAEAESWYQSKFEELRQTAGKHSDKLRNTKNEIMELSRVQR  
LHSEIDSVKQCASLQTAIAEAERGERMALKDAKCKLTDLEAALQKAKQDMARQLREYQ  
LMNVKALDIEIATYRKLIV-EGE  
>Alligator\_K5L3  
EKEQIKTLNKKFASFDKVRFLQONKMLETKW-MLLQEQGK-----TVR-NNIEPL--F  
ETYINLNRQLQLEVLGDRGRLDELKGMQDVEDFRIRYEDIEHKRTAENEFVVLKDDV  
DGAFMKNVLEAKVVDALTDENFLRSLYEAELQELQ-TQI--SDTSVIVQMD-NSRNLDL  
DSIIAEVKAQYEDIANSRRAEAESWYQSKFEELRQTAGKHSDKLRNTKNEIMELSRVQR  
LRADIESVKRQCASLQTAIAEAERGERMALKDAKCKLTDLEAALQKAKADLARQLREYQ  
LMNVKALDIEIATYRKLIV-EGE  
>Alligator\_K5L2  
EKEQIKTLNKKFASFDKVRFLQONKMLETKW-TLLQEQGT-----VTR-KTLEPL--F  
EAYISNLRQLQLEVLGDRGRLDELKGMQDVEDFRIRYEDIEHKRTAENEFVVLKDDV  
DNAYMKNVLEAKVVDALTDENFLRSLYEAELQELQ-TQI--SDTSVIVQMD-NSRNLDL  
DSIIAEVKAQYEDIANSRRAEAESWYQSKFEELRQTAGKHSDKLRNTKNEIMELSRVQR  
LRNEIDNVKQCANLQTAIAEAERGERMALKDAKCKLTDLEAALQKAKADLARQLREYQ  
LMNVKALDIEIATYRKLIV-EGE  
>Alligator\_K5L1  
EKEQIKTLNKKFASFDKVRFLQONKMLETKW-ALLNDQGGKSS--LSK-NMMDPL--F  
EAYISNLRQLQLEVLGDRGRLDELKGMQDVEDFRIRYEDIEHKRTAENEFVVLKDDV  
DAAYMKNVLEAKVVDALTDENFLRSLYEAELQELQ-TQI--SDTSVIVQMD-NSRNLDL  
SSIIAEVKAQYEDIANSRRAEAESWYQSKFEELRQTAGKHSDKLRNTKNEIMELSRVQR  
IRAEIENARNQCANLQTAIAEAERGERMALKDAKCKLTDLEAALQKAKADLARQLREYQ  
LMNVKALDIEIATYRKLIV-EGE  
>Alligator\_HBS1  
EKEQIKTLNKKFACFDKVRFLQONKMLETKW-DLLQEQIVP-----GTR-RNLEPL--Y  
ESPICNLRQLQLEHLLCDRDKLMCEEKAANHLVDFPKNKYEDEINRRTAENEFVVLKDDV  
DCLHLTKLELEIRVALLRQLEFLTCIFAEREAQMD-CQL--SDTSVIVQMD-NSRNLDL  
DSIIAEVKAQYEDIANSRRAEAESWYQSKFEELRQTAGKHSDKLRNTKNEIMELSRVQR  
LQCELDNVKQVGLQCLQTAIAEAERGERMALKDAKCKLTDLEAALQKAKADLARQLREYQ  
LLNVKALDIEIATYRSLI-EGE  
>Alligator\_HBS2  
EKEQIKTLNKKFACFDKVRFLQONKMLETKW-NLLQEQHTMP-----AAR-KTLEAY--F  
ENYICKLKKQLECLGEREQLSNKECVAKKLVDFRCKYEEVINRRTAENEFVVLKDDV  
DYAFLNTEQEVKVDLLKQCELELNVHVFTEERAQMD-CQL--SDTSVIVQMD-NSRNLDL  
ETIINKVCCYEEIAHKSABEAFYQTRLEELHTNRGKYCDDLRIQCEIADLKRGIQK  
LQCELDNVKQVGLQCLQTAIAEAERGERMALKDAKCKLTDLEAALQKAKADLARQLREYQ  
LLNVKALDIEIATYRSLI-EGE  
>Alligator\_HBS3  
EKEQIKTLNKKFACFDKVRFLQONKMLETKW-NLLQEQVLE-----PCR-KNLQHL--F  
ENYICSLQRQLDCLLSERQLEPELQNGKLVLEELCKYEEVINRRTAENEFVVLKDDV  
DCSYMKNVLEAKVVDALTDENFLRSLYEAELQELQ-TQI--SDTSVIVQMD-NSRNLDL  
EGIIREIECWYEEIAHKSABEAFYQTRLEELHTNRGKYCDDLRIQCEIADLKRGIQK  
LQHNLDNAKKEVACLQTSICETEQRGDCAKDAQKYGELQNALQKAKADLARQLREYQ  
LLNVKALDIEIATYRSLI-EGE  
>Alligator\_K78LT  
EKEQIKTLNKKFACFDKVRFLQONKMLETKW-ELLQEQGQT---GVH-RDIEPF--F  
QSYICHLRQRDITLQSQKEELNLEDCKMLQIVNEYKASYEKIDRRLCTEHEFVNLKKNL  
DCIYMGKMEVGVKVNILREEIEFLKCLYAMELSDVQ-RIA--QDTNVVVSMD-NCRDLVD  
EGIIAEIRREYEGLAQKSQAENVAVYQSKYQDLHNTWGRHCDRLRTRQHEIQELTRLIQK  
LRLDIGDVKKNAQLQEEIADVERRGCCAVSDAQEKLELRELRCSLLKADNLAHLRDRYQE  
LLNVKALDIEIATYRSLI-EGE  
>Alligator-K78L6  
EKEQIKTLNKKFASFDKVRFLQONKMLETKW-DLLQGT-----TTR-VSLEPM--F  
EAYISNLRQLQLELGNRQLEGLRNLQDLVDFPKNKYEDEINRRTAENEFVMSKDA  
DHSFMKNVLEAKVVDALTDENFLRSLYEAELQELQ-TQI--SDTSVIVQMD-NSRNLDL  
NSIIAEVKAQYEDIANSRRAEAESWYQSKFEELQTTAMTHGDDLNKTRNEISELTRIQR  
LKAEIDNVKQIAGLQTAIAEAERGERMALKDARAKLSDLQNALQKAKADLARQLREYQ  
LMNVKALDIEIATYRSLI-EGE  
>Alligator\_K78L5  
EKEQIKTLNKKFATFDKVRFLQONKMLETKW-ELLQEQGHS---GPR-KDLSL--F  
EYIQNLKRQLDLSILHOREQLESDLNMQPHVEEYKKEEYEEINRRTAENEFVVLKDDV  
DNAYMKNVLEAKVVDALTDENFLRSLYEAELQELQ-TQI--SDTSVIVQMD-NSRNLDL  
DSIIAEVKAQYEDIANSRRAEAESWYQSKFEELQNTAGRHGDDNLRNTKQEIQELTRCIQR  
LRSEIENVKQVRLQAAIAEAERGERMALKDARAKLQLEAALQKAKADLARQLREYQ  
LLNVKALDIEIATYRSLI-EGE  
>Alligator\_K78L4  
EKEQIKTLNKKFATFDKVRFLQONKMLETKW-ELLQEQGHS---GPS-KDLSL--F  
EYIQNLKRQLDLSILDERGQVLESDLNMQPHVEEYKKEEYEEINRRTAENEFVVLKDDV  
DNAYMKNVLEAKVVDALTDENFLRSLYEAELQELQ-TQI--SDTSVIVQMD-NSRNLDL  
DSIIAEVKAQYEDIANSRRAEAESWYQSKFEELQNTAGRHGDDNLRNTKQEIQELTRCIQR  
LRSEIENVKQVRLQAAIAEAERGERMALKDARAKLQLEAALQKAKADLARQLREYQ  
LLNVKALDIEIATYRSLI-EGE  
>Alligator\_K78L3  
EKEQIKTLNKKFATFDKVRFLQONKMLETKW-ELLQEQGHS---GPR-KDLSL--F  
ENYIQNLKRQLDLSIHGQRQLESELDNMQPHVEEYKKEEYEEINRRTAENEFVVLKDDV  
DCAYMKNVLEAKVVDALTDENFLRSLYEAELQELQ-TQI--SDTSVIVQMD-NSRNLDL

DSMIDEVRRQYEDIARSSRAEAEAWYQSRYEELQTTAGRHGDNLNRTKQEIQELTRCIQR  
LRSEIENVKKQXXX-----  
-----  
>Alligator\_K78L2  
EKEQIKTLNNKFATFIDKVRFLQONKVLSTKW-ELLQQQGPS----GPR-RDLTAL--Y  
ENYIENLRQLDNLVLSRQGPLESQLDHMQYVEDYKKNYEEINRRTSAENEFVVLKDDV  
DCAYMTKVDLEAKVQALIDEINFLRVVFEELSOLQ-TIS--RDLVVVSM-DNSRHLNL  
DSIIDETRAQYEQIAQSSRAEAEAWYQSRYEELQSTAGQHGESLRNTRQEIQELTRCIQR  
LRSEIENVRKQCEQLQAAIAEAEERGERMALKDARCKLELEECALHKKDEELARLLKEYQE  
LLNVKIALDIEIAMYRKL-EGE  
>Alligator\_K78L1  
EREQMTLNDKFASFIDKVRFLQONKVLSTKW-KLLQEQGGT---GPHSRSLDQL--Y  
EYVINSLRKQLDGLTSEKSQLQLELKNCDLVEDFKTKYDEEINKRTAAENDFVLLKDDV  
DAAYMKNVLEQAKLDSLADELNFLRCVYDAELSOMQ-QTV--SDTSVVLSDM-NNRNLDL  
DSIIAEVKAQYEEIAQSSRAEAEAWYQCKYQELQVTAAGKHGDSLKDTKAEISEMNRMIQR  
LRAEIEENVKQCEENLQTSVADAEQRGELALKDARVKLSELEAALQKAKTELTRQLRDYQE  
LMNVKIALDIEIATYRKL-EGE  
>Alligator\_K8L  
EKEBELKTLNNQFVHLIERVCSLEQHKVLETKW-SILKSQK-----ATP-ARMENL--L  
KTYISQLKHLADQGMKGLHLELHEIQDIMDENKQKYEENRNRNEKENDFLMKKEDV  
DEAYISQNELEGLDRLEDEFLKNFYDQEMHQLQ-TEVHMKYESVVISMP-SQPSLEV  
DSIVSEASQSYEKMAERSCKEAEKAYRDRHNKLDKSMGRHGEELQTMKTEINDLTRKSQH  
IQLEIQNLKEQCNLKEIDIANADDYKFPFIEEAKNKLHLENAIQKARQDMAHHLREYQE  
LLNTKGLDIEIATYRKL-EGE  
>Alligator\_K8  
EKEQIKSLNNKFASFIDKVRFLQONKVLSTKW-SLLQQR-----TTR-SNMGM--F  
EAYITNLRQLDGLDQDKLRLSELEGNVQGLVEFRSKYEDENHRTEKENEFVLLKDDV  
DEAYMKNVLESLRLEGLTDEISFLRQLYEEELHQLQ-SQV--SNTSVVLSDM-NNRSLDM  
DSIIDAVRNOYEDIANQSRABAEAGMYKIKYEELRNTASKHGDDLRTKAEISELTRTIQR  
MQAEIDAVKQGRANLEAAIAEAEERGERMAVRDARGKLALEAALQKAKQDMARQLREYQE  
LMNVKIALDIEIATYRKL-EGE  
>Turtle\_K80  
EKDEMILNDQFASLIGKVCLEQONKVLSTKW-SFLKQDQNS----RSE-LDIKLL--Y  
DOYMSKLLQEMRAVGHRELESELETEVLKSMNIRSYEEDIHKSGLFTFVLEKRDV  
DAGSMHRTLEVLKGLQELMELKAVYQELQELL-AEI--KDISIVMGID-NRCLNDL  
SRIVEVRAQYEAALFRSWEAEALWTKLNEGATHSATYRDLFSGRREIAELTIHQK  
LRCTIVSLKSQLRLEEDIKEAGNGQLALRNANTKLALEQALHKKADLVGLVKEYHE  
LMNKIALDVEILTIRKLV-EGE  
>Turtle\_K7  
EKEQIKTLNNKFASFIDKVRFLQONKVLSTKW-SLLQDQK-----TTR-SNIAPM--F  
EAYINLRQLDGLDNLNDRLEGLKELNMQDVEDFRNKYEDENHRTEKENEFVLLKDDV  
DASVMKNVLEAKVDALDTEINFLRSLYAELELQ-AQV--SDTSVVLSDM-NNRNLDL  
DSIIAEVKAQYEDIANRSRAEAEAWYQTKFETLQATAGKHGDELNRTKTEITETRMIRH  
LQAEIDNVKSRQAKLEAAIAEAEERGERAKDAMAKQEELEAALNKAKQDMARQLREYQE  
LMNVKIALDIEIATYRKL-EGE  
>Turtle\_K84L  
EKEQIKTLNNKFASFIDKVRFLQONKVLSTKW-SFLREQK-----HYQ-NMMEPM--F  
EAYISNLKROLENLGDRAKLETELHMQDILEDYKRYEEDENRTEKENEFVLLKDDV  
DCAYMKNVLEAKVVDALDTEINFLRSLYAELELQ-ASI--LDTSVIVQMD-NNRGLNM  
DDIIDAVKQYEDIANRSRAEAEAWYQTKYELKVTASKHCDNLHSTRNEITELNRIQR  
LHGELENVKAQRCKLEAAIAEAEERGERMALKDACKLALEAALTKAKQDLACQLREYQE  
LMNVKIALDIEIATYRKL-EGE  
>Turtle\_K5L4  
EKEQIKTLNNKFASFIDKVRFLQONKVLSTKW-CLLQEQK-----TAK-SNIEPM--F  
EAYINLRQLDGLDNLNDRLEGLKELNMQDVEDFRIRYEDENHRTEKENEFVLLKDDV  
DIAYMKNVLEAKVDALDTEINFLRALYAELEHLQ-SQI--SDTSVVLSDM-NNRNLDL  
DGIIEAVKAQYEDIANRSRAEAEAWYQTKYELQVTAAGRHGDDELNRTKTEISEMNRMIQR  
LRSEIDNVKQCASLQTAIAEAEERGERMALKDACKLALEAALQKAKADMARQLREYQE  
LMNVKIALDIEIATYRKL-EGE  
>Turtle\_K5L3  
EKEQIKTLNNQFASFIDKVRFLQONKVLSTKW-SLLQEQGK---TVK-NNIEPF--F  
ENYIGNLRQLDNLNDRLEGLKELNMQDVEDFRNKYEDENHRTEKENEFVLLKDDV  
DSAYMKNVLEAKVDALDTEINFLRALYAELEHLQ-QTV--SNTSVVLSDM-NNRDLDL  
DGIIEAVKAQYEDIANRSRAEAEAWYQTKYELQVTAAGRHGDDELNRTKTEISELTRIVQR  
LRNEIDNVKQCASLQAAIAEAEERGERMALKDARAKLALEAALQKAKADLARQLREYQE  
LMNVKIALDIEIATYRKL-EGE  
>Turtle\_K5L2  
EREQIKTLNNKFASFIDKVRFLQONKVLSTKW-TLLQEQGQT---TVK-RSLEPL--F  
DAYINLRQLDNLNDRLEGLKELNMQDVEDFRNKYEDENHRTEKENEFVLLKDDV  
DGSVMKNVLEAKADALADEINFLRALYAELEHLQ-QV--SDTSVVLSDM-NNRSLDL  
DSIIEAVKAQYEDIANRSRAEAEAWYQTKYELQVTSVGRHGDDELNRTKTEISELNRMIQR  
LRNEIDNVKQCASLQAAIAEAEERGERMALKDARAKLALEAALQKAKADLARQLREYQE  
LMNVKIALDIEIATYRKL-EGE  
>Turtle\_K5L1  
EKEQIKSLNNKFASFIDK-RFLQONKVLSTKW-TLLQDQGGKSN--SNK-NNLEPL--F  
ESYINLRQLDNLNDRLEGLKELNMQDVEDFRNKYEDENHRTEKENEFVLLKDDV  
DAAYMKNIDLEAKVDALMDEINFLRSLYAELEHLQ-VQV--SDTSVVLSDM-NNRDLDL  
SSIVNEVKAQYEDIANRSRAEAEAWYQNKFEELRATAGKHGDDELNRTKTEISELNRMIQR  
LRAEIEENARQCASLQTAIAEAEERGERMALKDARAKLALEAALQKAKADLARQLREYQE  
LMNVKIALDIEIATYRKL-EGE  
>Turtle\_HBS1  
EKEQIKLNDQFACFIDKVRFLQONKVLSTKW-DLLQQHAV----PAK-RDLLPV--F  
ENYICQLKQLECLLHDDRLEDEEKAVQDLVHKEYSKYEGEINKRTHAENEFVLLKDDV  
DCVPMTEKELEAKLLQRHFEFLKCFIEERAQLD-GQL--CDTAVVLEMD-NSRDLDL  
SGIIEAVKCCYEEIAQKSGEAEFTYQTRLEELSTNRGRFCDDLKNIQGEIAELKRLIHK  
LQGETDKVKKIEIACLQTAIAEAEERGERMALKDARAKLALEAALQKAKADLARQLREYQE  
LLNKIALDIEIATYRKL-EGE  
>Turtle\_HBS2  
EREQMTLNNQFACFIDKVRHLEQONKVLSTKW-NLLQQCVPP---APQ-KNLEQC--F  
ENYICSLRQLDGLDNLNDRLEGLKELNMQDVEDFRNKYEDENHRTEKENEFVLLKKEA  
DGTLLHKEELEVNTLSKQLEFLRCVFEDEERAQMD-GQF--CDTAVIVKMD-NSRDLDT  
DCIIEAVKQYEEIAQKSGEAEFTYQTRFEELQDQRGRFCEDLERNKHEIAELTRLIQK  
LQGETDHWKQIACLQTAIAEAEERGERMALKDARGHMELOALQKAKDELACMLRDYQA  
LLNVKIALDIEITTYKLL-EGE  
>Turtle\_K78L4  
EREQIKTLNNKFASFIDKVRFLQONKVLSTKW-DLLQQGGT---ITK-IPIDPL--F  
EAYINLRQLDGLDNLNDRLEGLKELNMQDVEDFRNKYEDENHRTEKENEFVLLKKEV  
DAAYMKNVLEAKVVDALDTEINFLRALYAELEHLQ-QQI--KDNVILQMD-NNRDLDL  
NSIIAEVKAQYEDIANRSRAEAEAWYQSRYEELQVTAATTHGEDLVKTRNEISEVSRVIQR  
LKAEIDSVKQIACLQTAIAEAEERGERMALKDARGLADLQNALQTTKDELARLLRDYQE  
LMNVKIALDIEIATYRKL-EGE  
>Turtle\_K78L3  
EREQIKTLNNKFASFIDKVRFLQONKVLSTKW-NLLQQOPTS---NAG-NNLEPA--F  
EAYVGSRLKHLDSLVGERGRQDSLEKNMQDVEDLKHKEYEENRMAAENEFVLLKDDL

DAAYMKLEMEAKVAAMTDEINFLRALYETELAQM-QI--SDTSVILSMD-NNRALDL  
DGIIEAVKHYEDMANRSRAEANSYQKGFQELQVOTAGKHNDLNKSKLEISELTRLIHR  
LQAELENVKKQCAKLSAVAEETGRGELTLKDAREKLVLEEMALQKAKBEETARLLRDYQE  
LLNKLALDIEIATYKTL-EGE  
>Turtle\_K78L2  
EKEQIKVNNQFAVFDKVRFLQONKVLVTKW-ELLQQGGT----I-K-KDLAPL--F  
ENFQSLRRRLDGLQNKQQLQSELENMQYVEEYKHYEDEINKRTAAENEFVVLKDDV  
DNAYMVKVELETRVQGLTDEINFLRPFIEEELSQ-LQ-TIS--RDLVSVVSM-DNRRLDL  
DGIIEAVKHYEIEAQRSRABAEAWYQRYEELQSTAGRHDNLRNKTTEIQELTRSIQR  
MRAEIESVKKQIANLQSAIAEAEKQELALDARAKLDDLEHALQKDKADLANLKEYQD  
LLNVKLALDIEIATYRKL-EGE  
>Turtle\_K78L1  
EREQMTLNNKFVFDKVRFLQONKVLVTKW-KLLQEQGG----PIK-KSLDQL--F  
EAYSNGLRKLQDGLLNERQLDTERKNFQDLVEDFKHYEIEINKRTVVENDFVVLKRD  
DVAYMSKVELQVKLDSLTDEINFLRCLYEAEELS-QM-QTA--SDTSVVLMSD-NNRRLDL  
DSIIEAVKHYEIEAQRSRABAEAWYQRYEELQSTAGRHDNLRNKTTEIQELTRSIQR  
LQAEIENVKQCERLQTSIADAEQGGELVLKDAKGLAELEGALQKAKADLARQLREYQE  
LMNVKLALDIEIATYRKL-EGE  
>Turtle\_K8L  
EKEQIKTLNNKFASFDKVRFLQONKVLVTKW-NILQGGQ-----TGP-SNMEKM--L  
KAYINSLQKLEDLGQQRVKLESQGNMQLVDFKHYEIEINKRTERENEFVVLKDDV  
DEAYIKKQELVQLSQTDEINFLMELYAKELRELQ-ADVEMSNPVPVISVD-SSPKLDV  
DSIIEAVKHYEIEAQRSRABAEAWYQRYEELQSTAGRHDNLRNKTTEIQELTRSIQR  
IRAEI AALKEQNAKLEANIVQAEQGGELAVADATGKQKMEHALQKAKEDMVVQLREYQA  
LMNLKLALDIEIATYRKL-EGE  
>Turtle\_K8  
EKEQIKTLNNKFASFDKVRFLQONKVLVTKW-DLLQGGQ-----TTR-SNMNML--F  
EAYINLRLQDGLQKLEKLEAEELGNMQLVDFKHYEIEINKRTERENEFVVLKDDV  
DEAYMKNVLESRLSLESLTDEINFLRQLYDEELRELQ-SQV--SDTSVVLMSD-NNRRLDL  
DGIIEAVKHYEIEAQRSRABAEAWYQRYEELQSTAGRHDNLRNKTTEIQELTRSIQR  
LQSEIDALKGQASLEAAITAEAEERGEMAIKDAKLAELLEGALQKAKQDMARQLREYQE  
LMNVKLALDIEIATYRKL-EGE  
>Lizard\_K80  
EKEEIKTLNNQFASLIGKVONLEQHNQVLLTRW-NFLREQDNS----LSD-LDIKLL--Y  
DQYMNRLRLEIRSDNEKQELDAELDEVLDAEDMNVNRYEIEINKRTEGMEFTTALKKDDV  
DNGFLHKTLEAKLSGLHAWVELMKNIQEQLLEVM-SQV--KDVSVVLGINNRYNPD  
HRIVEDVRAQYEAIAIRSWEEALTRSKLNEREVLVSVKYGDLHLLHRRRAIAELNIQIQK  
MRSCILSLKQCLRLDNDKVDGLQGETALNDAKAKLAKLEALHNAKQDLAQLVKQYQE  
LMNLKLALDIEIATYRKL-EGE  
>Lizard\_K7  
EKEQIKTLNNKFASFDKVRFLQONKVLVTKW-SLLQEQK-----TTK-SNLAPI--F  
ETYISNLRQLDLSLMDNDRLEGLERLNMQLVDFKHYEIEINKRTEGMEFTTALKKDDV  
DASYMKNVLESKVDGLTDEVNFLREFYAELELH-NQI--SDTSVVLMSD-NNRRLDL  
DSIIEAVKHYEIEAQRSRABAEAWYQRYEELQSTAGRHDNLRNKTTEIQELTRSIQR  
MQAEIENIKNQRGLAIAITAEAEERGELAVKDARAKLQELLENALNKAQEMARQLREYQE  
LMNVKMSLDIEIATYRKL-EGE  
>Lizard\_K84L1  
EKNEQLNSKQFASFDKVRFLQONKVLVTKW-DFLQERK-----CCK-SNMEPM--F  
EYIENLKLKQECMECERAEALQAEEMNWRLEALEVKNKKEECHRRTCTENEFVVLKDDV  
DCVPMKSEKAEKVALMKDLFFYKPTFYQELHELQ-SCI--SDTCVTVMQD-NSRGLNM  
DCVMEVYRQFEEISRSRAEAEAWCQCYQELKTTAAKHCDNLRHVKELSEITRVVHR  
LESEVSNVKAQCTKLEEEVAAEERGGIAVKDARCKLVELEDALHKAQDMACQLREYQD  
LMNMKGLDIEITTYKLL-DGE  
>Lizard\_K84L2  
EKNQQLNSKQFACFDKVRFLQONKVLVTKW-DFLQEKK-----CQK-SNMDDP--F  
HEYISNLRKLELRLQWERNQLQVEVNNWRDTEGKNKKEEYENRRAEAEENEFVVLKDDV  
DYIFMEKSEKAEKVALMKDLFFYKPTFYQELHELQ-SCI--SDTCVTVMQD-NSRDLV  
ACIIEEFCRYEDIAQRSRABAEAWCQCYQELKTTAAKHCDNLRHVKELSEITRVVHR  
LQAEIANVKAQRCKLEEEVAAEERGGIAVKDARCKLVELEDALHKAQDMACQLREYQD  
LMHLKLALDIEIATYRKL-EGE  
>Lizard\_K84L3  
TKNELQSLNSKQFASFDKVRFLQONKVLVTKW-DFVQEMK-----QHR-SDMEPL--F  
DDHTSRLKKELECLEREKEMQI EHDSSAQTELEKNKRYEIEINKRTEGMEFTTALKKDDV  
DFAFADKAELEAKVEKLAHISFLKHIYAQELSELQ-NCI--SETCVVMQD-NNRALDM  
NRTIEEFCRYEDIAQRSRABAEAWCQCYQELKTTAAKHCDNLRHVKELSEITRVVHR  
LESQITSIKTQRCLREDEVEEAKHEGTAVKDARCKLVELEDALHKAQDMACQLREYQD  
LMNVKAMNIEIATYRKL-EGE  
>Lizard\_K84L4  
EKEQIKTLNNKFASFDKVRFLQONKVLVTKW-SLLQEQK-----RVK-SNIEPL--F  
DGLIHLKQKLESLGCDNRKLESDLTSSRDILEDYRKYEIEINKRTEGMEFTTALKKDDV  
DCIYMHKADLEKGVESLVEEVNLRCLHDMELQELH-SCI--SDTSVVLMSD-NSRELDL  
DGIIEAVKHYEIEAQRSRABAEAWYQRYEELQSTAGRHDNLRNKTTEIQELTRSIQR  
LKAIEDTAKGQRSLKLEAAVAAEERGGIAVKDARCKLVELEDALHKAQDMARQLREYQE  
LMNVKLALDIEIATYRKL-EGE  
>Lizard\_K5L4  
EKEQIKTLNNKFASFDKVRFLQONKVLVTKW-SLLQEQK-----ITR-HNFDAM--F  
EAYITNLRQLLEGLGERPRLSELEKNMQLVDFKHYEIEINKRTEGMEFTTALKKDDV  
DAAFMKNVLEAVDSINDEATFLKSFYDAELAQMH-AQV--SDTSVVLMSD-NSRRLDL  
DSIIEAVKHYEIEAQRSRABAEAWYQRYEELQSTAGRHDNLRNKTTEIQELTRSIQR  
LHSEIDNVKQCAGLQASIAEAEERGELALDKDARAKLAELEALQKAKADMARQLREYQE  
LMNVKLALDIEIATYRKL-EGE  
>Lizard\_K5L3  
EREQIKTLNNKFASFDKVRFLQONKVLVTKW-TLLQEQGG----TCK-SNIEPL--F  
EMYINDLRKLNLENDGRLLGELNINQLVDFKHYEIEINKRTEGMEFTTALKKDDV  
DAAYLNKVELESKADSLNCEVNFRLALYEELAQMH-TQI--SDTSVVLMSD-NNRRLDM  
DSIIEAVKHYEIEAQRSRABAEAWYQRYEELQSTAGRHDNLRNKTTEIQELTRSIQR  
LRAEIDNVKQCANLQAAIAEAEERGELALDKDARAKLAELEALQKAKADMARQLREYQE  
LMNVKLALDIEIATYRKL-EGE  
>Lizard\_K5L2  
EREQIKTLNNKFASFDKVRFLQONKVLVTKW-DLLQEQGGT----CQ-STMPEL--F  
DVYITNLRQLLEALTNERGRLLDSELNMQDMVEDYKHYEIEINKRTEGMEFTTALKKDDV  
DGAYMKNIELAGKFEPLNDEIEFLKAMYDAELS-QM-QHV--SDTSVVLMSD-NNRCLDL  
NSIIEAVKHYEIEAQRSRABAEAWYQRYEELQSTAGRHDNLRNKTTEIQELTRSIQR  
LRSEIDSPKQCANLQAAIAEAEERGELALDKDARAKLAELEALQKAKADMARQLREYQE  
LMNVKLALDIEIATYRKL-EGE  
>Lizard\_K5L1  
EKEQIKTLNNKFASFDKVRFLQONKVLVTKW-TLLQEQGGT----ANK-GNLDPL--F  
EAYINLRLQNLNLINEKGRLLDSELNMQDMVEDYKHYEIEINKRTEGMEFTTALKKDDV  
DAAYMKNVLEAVDSINDEATFLKSFYDAELAQMH-AQV--SDTAVILSMD-NNRDLDL  
NGIVSEVKAQYEDIAQRSRABAEAWYQRYEELQSTAGRHDNLRNKTTEIQELTRSIQR  
IRAEIENARNQCANMQTAIAEAEERGELALDKDARAKLAELEALQKAKADMARQLREYQE  
LMNVKLALDIEIATYRKL-EGE  
>Lizard\_HBS1  
EKEQIKDLNNQFACFDKVRFLYLEERNQALATKW-ELLKSNP-----AVK-KDLSPL--C

ENYITSMRRKLDNLLCEKNQLQEQEHKTMLDLIEANRCKYEEVKKRRNTAENEFIVLKQDV  
DGIFKQKLEQKKEVLEENIGFLTNFFSKERAILE-SQL--NNTSVVVMND-NSRCLDM  
DGLIQIEISWYQGVQKSGEANLFWYQWMDLQSKRSQFYEKLRQNNADIAELNRVYQI  
MRCQVTEKQKVASLHAALRETKELGHALQDAESKYKDLQNRVQTSKDRVALVRDYQD  
LMNTKALDIEIATYKTL-EGE  
>Lizard\_HBS2  
EKEEMKTLNNQFACFIDKVRSLQONKVLGTTK-ELLNQCQVQ----PAK-KNLEGY--Y  
ENFIATLTKKLECLLSEKLEHEQKQNMQLVEYRKYEEVKNRRTAENEFVLLKQDV  
DCVFLTKKELESKVDVLAQLEVLRCVFAEELTQLD-SQI--LDTSVILKMD-NTRDLHM  
DLILQNVENWYQNIAHNSKQEAFAFYHNKIAEIQNNRSKFNEELKCNQHEIAELNRVTQR  
LRDTLGNAKKQVSNLQSAICDAEQRGDIALKDARNKHAELQNAQQSKDKLASLLRDYQD  
LLNTKALDIEIATYKML-EGE  
>Lizard\_HBS3  
EREEMKTLNNQFACFIEKVRILEQENKALETWK-NLLQQYAM----VPR-RNLEPY--Y  
ENFISNMKYQIDCLLHTRHLANDKNAIQELVEDFKSKYEEFKRRRTAENEFVLLKQDV  
DSISLTKTEEGKMLLRWELEFRKSVYMEELMQLS-GQI--SDMNLVQMD-NNRDLDM  
DSIIKVNVAWYQSIHRSKQEVNLYADRFQELQEQQRGKYLNLDKINQYIEELTRAVHT  
LQSDHSNVKQVADALQASICDQVQDQALQKDAQEKHSDLLSALQKAKDDLQAGMLKDYHD  
LLNVKALDIEIATYKTL-EGE  
>Lizard\_K78L1  
EREQIKTLNDQFACFIDKVRHLEQONKLETKW-SCLQQQEP----MEK-QNTEHL--Y  
QNYIVTLKQKLDLDEREQKLEQVQFQDVVEYKSRVEGVINRRLGAENEFVLLKQDV  
DCAYTSKVELEVKVDSLQEQDFHRCVYDTELESLA-TAS---DTNVVMSD-NSRDLDM  
EGIEISVRCQYEEIAQRKDEVNLYETKYELQTTWGHHCNSLSSSRHEIQELTRLIQR  
YKADVENGKQVEALQVAVADHEQQGDCTLKDAKEKLAEVEKALQSTKDELARLLRDYQD  
LLNVKALDIEIATYKML-EGE  
>Lizard\_K78L5  
EREQIKTLNNKFATFIDKVRFLQONKVLQETWK-DLLYQQGTP----ALR-DNLEPL--Y  
EAYIDTLRQFESLTDNKNHLDIELKNTQELVEDFKSKYEDINKRTACENDFVLLKQDV  
DGSYMHKIDLQSKADSLTQHIFLRLAFETELSQVQ-SQV--RDTNVVQMD-NNRDLDM  
NGIIAEVRAQYEDIANRSRAEAETWYQSKYQELQTTAQKHCDLKTTHDIAEMSRVVKH  
LRAEIEIVKAVNGLQSSIAEAEQGEIALKDAQKLLDLQSAELTSKDELARLLRDYQD  
LMNVKALDIEIATYKTL-EGE  
>Lizard\_K78L4  
EREQIKTLNNKFASFIKVRFLQONKVLQETWK-NLLQQQGST----ATT-IHIDPM--F  
EAYINLRQQLDGLVDRGRLDGELRNTQDLVEDYRKYEDINKRTAENEFVLLKQDV  
DGGFMHKEIAGAKADGLTDEINFLRALHEAELSQIQ-GRI--SDTNIVLQMD-NNRIDL  
NSIIEVKAQYEDIANRSRAEAETWYQSKYQELQTTAVNHGDDLKNTKNEIAELSRIIQR  
MKAEIDNVKQIAGLQTAADAEQGEIALKDARVKLTDLQHALQSAKDELARLLRDYQD  
LMNVKALDIEIATYKTL-EGE  
>Lizard\_K78L3  
EREQIKTLNNKFASFIKVRFLQONKVLQETWK-NLLQQQMP----HLK-RKADHT--F  
EAYIHGLRQQLLESSTERGRLESEWKNMQLVEDFKRKYEDINKRTAENEFVLLKQDV  
DLAYMNMELKTRTASLDKEVDLRSLYEEOQMQ-SQV--TDTSIILSMD-NSRDLDM  
DVIIAEVKAQYEDIANRSRAEAETWYQSKYQELQTTAGKHDDALKNKTEILELNRLIHR  
LRAETGTVKKQCAFQSSIAEAEERGETALKDAREKLTLENATQKSNELVRLRDYQD  
LLNVKALDIEIATYKTL-EGE  
>Lizard\_K78L2  
EKEQIKLNNQFANFIDKVRFLQONKVLQETWK-QILQQQTQGR---GPM-QNLQDGE--Y  
QFLNGLRNQIDQIRSQQLMSELQNMQVQVDSKKNYEQEINQRTTSENEFVLLKQDV  
DSAYMTKVDLDAKVGIVQINFRRIFDIELSQIP-IGG--KDTSVVVMND-DSRDLNL  
EGMIDEVRAQYEEVARSRAEAETWYRSQYEAALQNAAGRHNELQNTQRIQELTRNIQR  
LRTEIEHAKKQAAQMSAIAEAEERGERMALRDAKQKLEDEGLSTKDKVRLARLLKEYQD  
LLNVKALDIEIATYKML-EGE  
>Lizard\_K78L1  
EKEQIKLNNKFASFIKVRFLQONKVLQETWK-KLLQEQGPG----AIQ-KHLDPM--Y  
EAYINLRQQLLECLQNEKRLDSELKNFQDMVEDYKTYEEDINKRTAENEFVLLKQDV  
DAAYMNVKELQAKCDALIDEINFMKCLYEAELSOMQ-QTV--SDTSVILQMD-NNRCLDM  
DSIIAEVKARYEIEIAQMGRIAEAFYQSKYELQASVQKHGDLNKTAEISEHNRIQR  
IRAEIDNVKQCEKLSIAEAEERGERLAKDARNKLELEALQKAKEEMTRLLKEYQD  
LMSCKALDIEIATYKML-EGE  
>Lizard\_K8  
EKEIKSLNNKFAGFIKVRFLQONKMLDTKW-SLLQONK-----ITR-SNMDSM--F  
EAYINLRQQLDGLQGERVRLDSELGNMQGLVEFKSKYEDENHRTEKENDFVLLKQDV  
DEAYMNIIELESRLTDELNFRQLHEEELRVLQ-SQI--SDTSVVLQMD-NNRSLDL  
DGIIEVKAQYEEVAARSRAEAETWYRSQYEAALQNAAGRHNELQNTQRIQELTRNIQR  
IQSEIDGLKQANLESAIAEAEERGERLAVKDATAKLESEALQRAKQDMARQLRYEQD  
LMNVKALDIEIATYKML-EGE  
>SnakeP\_K80  
EKEQIKLNNQFALIGKQVSLQEQHNVLLTRW-NFLKEQDSS----LSD-LDIKLL--Y  
DRYMNKLNLEIRSIDVEKQLDSELDEVLASMDVFRSKYEDENHRTEKENDFVLLKQDV  
DNGFLHKTLETKLSGLHAWELMTTIOEQEELVVM-SQI--KDVSVVLGIDNNRMPDP  
HRIIVEDVRAQYEDLARSWELEALTRSKLNEREVLQATAGKHGDLRSTRNEIAELNRIQR  
MRSCIVSLKQCLQLEDNKNVGLQGETALNDKAKLAKLEDAHSARQDLAQLVKYEQE  
LMNIKALDIEIATYKML-EGE  
>Snake\_K7  
EKEQIMVNNKFASFIKVRFLQONKMLQETWK-SILQQQKT----STR-NNTAPV--F  
EAYINLRQQLDLSLQNDKGRLEGEELKNMQDLVEDFKNYEEDINKRTAENEFVLLKQDV  
DASVMNKVELEARVDGLTDEINFLRALYDAELAELO-NQV--SDTSVILQMD-NNRDLDM  
DSIIAEVKAQYEEIANRSRAEAETWYRSQYEAALQNAAGRHNELQNTQRIQELTRNIQR  
LQADIDNVKQRAKLESAIAEAEERGERLAVKDATAKLESEALQRAKQDMARQLRYEQD  
LMNVKALDIEIATYKML-EGE  
>Snake\_K5L2  
EKEQIKLNNKFASFIKVRFLQONKVLQETWK-TLLQKHDQK---TVM-SNVEPL--F  
EAYINLRQQLVNDLEKEKVKLDGELHTTQNLVEDYKSKYEDENHRTEKENDFVLLKQDV  
DAAYMKNADLETRQLSLVDETDLRLHLETALDLO-RQI--SDTSVVLQMD-NNRVLDL  
DSIIAEVKAQYEDIAKRSRAEAETWYRSQYEAALQNAAGRHNELQNTQRIQELTRNIQR  
IKAEIESVKQCANLQAKIAEAEERGERLAVKDATAKLESEALQRAKQDMARQLRYEQD  
LLNVKALDIEIATYKML-EGE  
>Snake\_K5L1  
EREQIKTLNNKFASFIKVRFLQONKVLQETWK-ELLQROGTQ---VQQ-RNLEPL--F  
ENYIANLRQFQDYLVNERGRLDMLRNMQDMVEDFKNYEEDENHRTEKENDFVLLKQDV  
DGAVMNKIELEASDLSINDEIFLKLFAEELSOMQ-QVQ--SDTSVVLQMD-NNRSLDL  
NSIIAEVKAQYEDIANRSRAEAETWYRSQYEAALQNAAGRHNELQNTQRIQELTRNIQR  
LRSEIDAYKQCANIAEAEERGERLAVKDATAKLESEALQRAKQDMARQLRYEQD  
LMNIKALDIEIATYKML-EGE  
>Snake\_HBS1  
EMEOMKSLNSKFAGFIKVRQLEQONKLETKW-AFLQQQTK----PPT-ESLECM--F  
EQYIASLKELEYLQYKENDQNDRESAKAQTADCKCYEKKVQHVAAEKIEIELRQDV  
DYIFSNNAELERKVSLLDREIKFLCKVYKKEKQLD-KQD--QDVVVVKMD-NSRNLDM  
DNIIAMVRKYEEIMQRSKAEADKPYQNKYEEAQSSSYKWDLNKREQQISELIQQVEK  
VQGEIQSLQKENEELKKTICBAKGGEQASKEGQKYAELVKALQNGKDELASLRDYQD  
VLNVKALDIEIATYKML-EGE  
>Snake\_HBS2

EKDQMKDLNTQFASFIEKVRSLERQNRILITKW-ELLQNKMP----KVK-KDLSTL--F  
DNYIANLRKIDYMFNEKNLENQQRMMQDLIEEYQCRYKEENNRKEHLENEFILLKQV  
DNEFKQERELKRELLMENKFLKYFFTEHAAILN-CHP--PDTSVVLNMD-NSRGLDM  
DVLKINIDSWYHNIAQRSKEEAFYQNIQEDLQNKCCQRESLQKTSDEITELNRVLH  
MQSKLDNEKKKTAALQIAIGDIEHKGDHALKDARAKQTELRNRIQNSKDLAVILRDYQD  
LMNTKLALDIEIATYNTML-EGE  
>Snake\_HBS3  
EKEEMKILNNQFACFIDKVRSLERQNKVLETKW-ELLNQYVQ----PTR-KNLEAY--Y  
GNFISLKKQLECVLTEREKLEHEQKNMQELVEYR.SRYEDEVNRRRTAENDFVLLKQDV  
DCVFLTKEELESKVDLAQLEVLRCIFAEELTQFN-HQI--CDTSVVLKMD-NTRALDM  
DLILKNVEAWYQNIQHTSKQEAFAFYHKSIAEQNRGKFNEELKNNQHEIAELNRVQR  
LQADTDNAKQVSLQSAICDSEQRGDIALKDARTKHLRLQYAYQSKDKLACLLRDYQE  
LLNTKLALDIEIATYKALL-EGE  
>Snake\_HBS4  
EREEMKSLNNQFASFIDKVRNLELQNKVLETKW-NLLQEHVI----PAK-KSLEPY--Y  
ENFISNMKQLECLLNNQEHLRNENDGIEQLVEDFKCNYEEFKRRRTAENEFVLLKQDV  
DSISLSKSELEGGVHLLSSELEFRFRGIYAEELQALS-TNV--YDTNILLQMD-NSRNLNI  
DSIISVEAWYKNVAQGSKEEAFYENRFQELQQQRGKYSQTLKINQEQEADLTRLVHK  
LQSEYDIKKQVNGFQTSVCEIEQHGDCVLKDARDKHIIDLQYAVQKAKDDLARLLRDYQE  
LLNTKLALDIEIATYKTL-EGE  
>Snake\_K78L7  
EREQIKTLNKKFVFSIDKVKHLEQQNKLETKW-NCLQQQEP----VEK-ANIQL--F  
ENYITSLKQQLRLLNERQLQLEQSKFQDMVEEYKSRYEENHRMSAENNFVLLKQDV  
DIAYSNKVDLEVKVLELRLQELNFRVCFEAEIESLQ-AAN--AETNVIQMD-NSRVLDM  
EGIIHVSRSQYEEIAQKSKDEFVNALYENKYELQNTWGNVNNLSSGRHEIQELTRMVQR  
CRSEVESTKQIDALQTSIADNEQRGESALKDAKLLKLEVENNLQSSKDELARLLRDYQ  
VNLVKIALDIEIATYKSL-EGE  
>Snake\_K78L4  
EREQIKTLNKKFASFDKVRFLQNKVLETKW-DLLCQQGSP----ALR-DNLEPI--Y  
EAFIEALRRQFDSLNDKNHLDIELKNTQELVEDFKNKYEDEINKRTACENDFVLLKQDV  
DGSYMHKIDLQSKADSLTYIQFLRALFPAELTQLH-SQV--KETNVIQMD-NNRDLDL  
DSIIAEVKAQYEDIANRSRAEAEAWYQTKFQELQSTAFKHGDLLKTKDEIADLRVQR  
IRSEIEIVKKAISLQSSGAEAEQRGELALKDARTKLLDLQALTSAKDELARLLRDYQE  
LMNVKALDVEIATYRTRL-EGE  
>Snake\_K78L3  
EREQIKTLNKKFASFDKVRFLQNKVLETKW-NLLQQHGSS----VPK-LSLEPL--F  
ENYIINLRQLDLSLIGNRAKLSDLRNMQDLVEDYRKYEEENKRTAENDFVGIKKDV  
DVSPMQKVDLQAKVDRLLDIEINFLKALHAELIQIQ-GQI--SDTNVVLQMD-NNRDLDL  
NSIIAEVKAQYEDIANRSRAEAEAWYQTKFQELQIIAVGHGDLLKTKNEIRELNRLINR  
LKAETENVIKTISRIQKADAEERGQALAKDAQVKLNDLQQAQIQNSKDELARLLRDYQE  
LMNVKALDVEIATYRTRL-EGE  
>Snake\_K78L2  
EKEQIKVLLNNQFASFIDKVRFLQNKVLETKW-QILQSQSGI---GPT-MNLDA--F  
QQFLNSLSQIENIRSQGLTTELQSMQHYVEYKKNYEEENKRTAENDFVLLKQDV  
DCAYLSKSNLDSRVGALADQINFLRRIFEVEISQYQ-TGG--QDTSVVVSM-DNNTLNL  
EGIIDEVRSQYEEIARSSRAEAEAWYQYALQNTAGRHGDNLNRTRQEIQELTRNIQR  
LRSEIEHVKKQXXX-----  
-----  
>Snake\_K78L1  
EREQIKTLNKKFASFDKVRFLQNKVLETKW-KLLQEQGGT---GGQ-KNLDHF--F  
EAYISNLRQLDGLLNERGFESELKNMQDLVEDFKNKYEENKRTAENDFVLLKQDV  
DAAYMKNVLELQAKMDALDIEINFLRCMFAELNMQQ-QSV--SDTSVVLQMD-NNRSLDL  
NSIIAEVKAQYEDIAQKSRABAEAWYQCKYEEELQVSAGRHGDNLDRDTEIAELNRVIQR  
MRAEIEENVKQCEKLQASIAEAEERGELALKDAREKLESELEALQKSKEMARLLKQYQE  
LMNVKALDVEIATYRKL-EGE  
>Snake\_K8  
EKEEIKTLNKKFANLIDKVRFLQNKVLETKW-SLLQNKQ-----TTR-SNMDSM--F  
EAYINLNRQLDGLLNERGFESELKNMQDLVEDFKNKYEENKRTAENDFVLLKQDV  
DEAYMKNVLELQAKMDALDIEINFLRFYDEELRVLQ-SQI--SDTSVILSMD-NNRSLDL  
DGIITDVKAQYEEIANRSRAEAEAWYQIKYEEELQTVAGKHGDLLRSTKNEINELSRMINR  
IQSEIDGLKGRASLEAAITEAEERGELAVKDANNKLAELSAMQRAKQDMARQLREYQE  
LLNTKLALDVEIATYRKL-EGE  
>Human\_K1  
EREQIKSLNNQFASFIDKVRFLQNKVLETKW-ELLQQVDT-----TRT-HNLEPY--F  
ESFINLNRRLVDQLKSDQSLDSELKNMQDMVEDYRKYEEENKRTAENDFVLLKQDV  
DGAYMKNVLELQAKMDALDIEIDFLRTLYDAELSQMQ-TQI--SETNVIQMD-NNRSLDL  
DSIIAEVKAQYEDIAQKSKAEAEALYQSKYEEELQITAGRHDGSDVRNSKIEISELNRVQR  
LRSEIDNVKQIISNLQSSISDAEQRGENALKDANKLNLDLEALQAKEDLARLLRDYQE  
LMNTKLALDVEIATYRTRL-EGE  
>Human\_K2  
EREQIKTLNKKFASFDKVRFLQNKVLETKW-ELLQQMNVG----TRP-INLEPI--F  
QGYIDSLKRYLDGLTARTSQRSLDSELKNMQDMVEDYRKYEEENKRTAENDFVLLKQDV  
DNAYMKNVLELQAKMDALDIEIDFLRTLYDAELSQMQ-SHI--SDTSVVLQMD-NNRSLDL  
DSIIAEVKAQYEDIAQKSKAEAEALYQTKLQELQTTAGRHDGSDVRNSKIEISELNRVQR  
LQSEIAHVKKQCKNVQDAIADAEQRGEHALKDARNKLNLDLEALQAKEDLARLLRDYQE  
LMNVKALDVEIATYRKL-EGE  
>Human\_K3  
EREQIKTLNKKFASFDKVRFLQNKVLETKW-NLLQQQGTSSI--SGT-NNLEPL--F  
ENHINLRSYLDNIGLGRDLSELKNMQDMVEDYRKYEEENKRTAENDFVLLKQDV  
DSAYMKNVLELQAKMDALDIEIDFLRTLYDAELSQMQ-SHI--SDTSVVLQMD-NNRSLDL  
DSIIAEVKAQYEDIAQKSKAEAEALYQTKLQELQTTAGRHDGSDVRNSKIEISELNRVQR  
LRSEIEHVKKQANLQTAIAEAEQRGEMALKDANKLQELQALQAKDDLARLLRDYQE  
LMNVKALDVEIATYRKL-EGE  
>Human\_K4  
EREQIKLNNKFASFDKVRFLQNKVLETKW-NLLQQQTTT----TSS-KNLEPL--F  
ETYSVLRKQLDITLNDGRLQSELKTMQDSVEDFKNKYEENKRTAENDFVLLKQDV  
DAAYMKNVLELQAKMDALDIEIDFLRTLYDAELSQMQ-THV--SDTSVVLQMD-NNRSLDL  
DSIIAEVKAQYEEIANRSRAEAEAWYQTKYEEELQTTAGRHDGSDVRNSKIEISELNRVQR  
LRSEIEHVKKQCANLQTAIAEAEQRGEMALKDANKLQELQALQAKDDLARLLRDYQE  
LMNVKALDVEIATYRKL-EGE  
>Human\_K5  
EREQIKTLNKKFASFDKVRFLQNKVLETKW-TLLQEQGK----TVR-QNLEPL--F  
EQYINLNRQLDQIVGERGRDLSELKNMQDMVEDYRKYEEENKRTAENDFVLLKQDV  
DAAYMKNVLELQAKMDALDIEIDFLRTLYDAELSQMQ-THV--SDTSVVLQMD-NNRSLDL  
DSIIAEVKAQYEEIANRSRAEAEAWYQTKYEEELQTTAGRHDGSDVRNSKIEISELNRVQR  
LRSEIEHVKKQCANLQTAIAEAEQRGEMALKDANKLQELQALQAKDDLARLLRDYQE  
LMNVKALDVEIATYRKL-EGE  
>Human\_K6B  
EREQIKTLNKKFASFDKVRFLQNKVLETKW-TLLQEQGK----TVR-QNLEPL--F  
EQYINLNRQLDQIVGERGRDLSELKNMQDMVEDYRKYEEENKRTAENDFVLLKQDV  
DAAYMKNVLELQAKMDALDIEIDFLRTLYDAELSQMQ-THI--SDTSVVLQMD-NNRSLDL  
DSIIAEVKAQYEEIANRSRAEAEAWYQTKYEEELQTTAGRHDGSDVRNSKIEISELNRVQR  
LRSEIEHVKKQCANLQTAIAEAEQRGEMALKDANKLQELQALQAKDDLARLLRDYQE  
LMNVKALDVEIATYRKL-EGE



>Human\_K6C  
EREQIKTLNKKFASFDKVRFLQONKVLDTKW-TLLQEQGK- ---TVR-QNLEPL--F  
EQYINLRRQLDSIVGERGRDSELRNMQDLVDFKKNKYEDEINKRTAAENEFVLLKDDV  
DAAYMNKVELQAKADTLTDEINFLRALYDAELSOMQ-THI--SDTSVVLMSD-NNRNLDL  
DSIIAEVKAQYEEIAQRSAEAEAWYQTKYEELQVQTAGRHGDDLNRNTKQEIENRMIQR  
LRSEIDHVKKQCASLQAAIADAEQRGEMALKDANKLEGLLEDALQKAKQDLARLLKEYQE  
LMNVKLALDVEIATYRKLL-EGE  
>Human\_K6A  
EREQIKTLNKKFASFDKVRFLQONKVLDTKW-TLLQEQGK- ---TVR-QNLEPL--F  
EQYINLRRQLDSIVGERGRDSELRNMQDLVDFKKNKYEDEINKRTAAENEFVLLKDDV  
DAAYMNKVELQAKADTLTDEINFLRALYDAELSOMQ-THI--SDTSVVLMSD-NNRNLDL  
DSIIAEVKAQYEEIAQRSAEAEAWYQTKYEELQVQTAGRHGDDLNRNTKQEIENRMIQR  
LRSEIDHVKKQCANLQAAIADAEQRGEMALKDANKLEGLLEDALQKAKQDLARLLKEYQE  
LMNVKLALDVEIATYRKLL-EGE  
>Human\_K7  
ESEQIKTLNKKFASFDKVRFLQONKVLDTKW-TLLQEQKS- ---AKS-SRLPDI--F  
EAQIAGLRQLEALQVDDGRLEAELRSMQDVDFKKNKYEDEINKRTAAENEFVLLKDDV  
DAAYMSKVELEAKVDALNDEINFLRLNETELTELQ-SQI--SDTSVVLMSD-NRSRLDL  
DGIIEAVKAQYEEIMAKCSRAEAEAWYQTKFETLQAQAGKHGDDLNRTRNEISEMNRRAIQR  
LQAEIDNKNQRAKLEAAIADAEQRGELALKDARAKQEELEAALQKQDMARQLREYQE  
LMSVKLALDIEIATYRKLL-EGE  
>Human\_K8  
EKEQIKTLNKKFASFDKVRFLQONKMLDTKW-SLLQOQK- ---TAR-SNMDNM--F  
ESYINLRRQLDLETLGQEKLELAEELRSMQDVDFKKNKYEDEINKRTAAENEFVLLKDDV  
DAAYMNKVELESRLEGLTDEINFLRLQYEEIELELQ-SQI--SDTSVVLMSD-NRSRLDL  
DSIIAEVKAQYEDIANRSRAEAEAWYQTKYELQSLAGKHGDDLNRTRNEISEMNRNISR  
LQAEIEGLKQGRASLEAAIADAEQRGELALKDANAKLSELEAALQKQDMARQLREYQE  
LMNVKLALDIEIATYRKLL-EGE  
>Human\_K71  
EREQIKALNKKFASFDKVRFLQONQVLETKW-ELLQQLDLN- ---NCK-NNLEPI--L  
EGYISNLRKQLETLGDRVRLDSELRNVRDVEDYKKNYEEIEINKRTAAENEFVLLKDDV  
DAAYANKVELQAKVESMDQEKFPFCLFEAEITQIQ-SHI--SDMSVILMSD-NNRNLDL  
DSIIDEVRTQYEEIALKSKAEAEALYQTKFQELQLAAGRHHGDDLNRTRNEISELTRLIQR  
LRSEIDNKNQASNLTAIADAEQRGDNALKDARAKLDELEALHQAQKQDMARQLREYQE  
LMSLKLALDMEIATYRKLL-ESE  
>Human\_K72  
EREQIKALNKKFASFDKVRFLQONQVLETKW-NLLQQLDLN- ---NCR-KNLEPI--Y  
EGYISNLRKQLEMLSGDGRVRLDSELRNMQDLVDFKKNYEEIEINKRTAAENEFVLLKDDV  
DAAYMNKVELQAKVDSLDEIKFPKCLYEGEITQIQ-SHI--SDTSIVLMSD-NNRDLDL  
DSIIAEVKAQYEEIALKSKAEAEALYQTKFQELQLAAGRHHGDDLNRTRNEISELTRLIQR  
LRSEIDNKNQCADLETAIADAEQRGDNALKDARAKLDELEALHQAQKQDMARQLREYQE  
LVSLKLALDMEIATYRKLL-ESE  
>Human\_K73  
EREQIKVNLNKKFASFDKVRFLQONQVLETKW-ELLQQLDLN- ---NCK-NNLEPI--L  
EGYISNLRKQLETLGDRVRLDSELRNVRDVEDYKKNYEEIEINKRTAAENEFVLLKDDV  
DAAYTSKVELQAKVDALDGEIKFPKCLYEGEITQIQ-SHI--SDTSIILMSD-NNRNLDL  
DSIIAEVKAQYEEIARKSKAEAEALYQTKFQELQLAAGRHHGDDLNRTRNEISELTRLIQR  
LRSEIDNKNQCANLETAIADAEQRGDNALKDARAKLDELEALHQAQKQDMARQLREYQE  
LLSVKLSLDIEIATYRKLL-EGE  
>Human\_K74  
EREQIKVNLNKKFASFDKVRFLQONQVLETKW-ELLQQLDLN- ---NCK-KNLEPI--L  
EGYISNLRKQLETLGDRVRLDSELRNVRDVEDYKKNYEEIEINKRTAAENEFVLLKDDV  
DAAYAVKVELQAKVDSLDEIKFPKCLYDAEIAQIQ-THA--SETSVILMSD-NNRDLDL  
DSIIAEVKAQYEEIARKSKAEAEALYQTKFQELQLAAGRHHGDDLNRTRNEISELTRLIQR  
LRSEIDNKNQCANLETAIADAEQRGDNALKDARAKLDELEALHQAQKQDMARQLREYQE  
LMSLKLALDMEIATYRKLL-EGE  
>Human\_K75  
EREQIKTLNKKFASFDKVRFLQONKVLDTKW-ALLQEQGS- ---TVR-QNLEPL--F  
DSYTSLELRQLSITTERGRLEAELRSMQDVDFKKNYEEIEINKRTAAENEFVLLKDDV  
DAAYMNKVELEAKVKSLEPEINFHVSFVDAELSOLQ-TQV--GDTSVVLMSD-NNRNLDL  
DSIIAEVKAQYEDIANRSRAEAEAWYQTKYEELQVQTAGRHGDDLNRNTKQEIENRMIQR  
LRSEIDSVKQCSLQTAIADAEQRGELALKDARAKLVDLEALQKAKQDMARQLREYQE  
LMNKLALDVEIATYRKLL-EGE  
>Human\_K76  
EREQIKTLNKKFASFDKVRFLQONKVLDTKW-ELLQOQTG- ---SGP-SSLEPC--F  
ESYISFLCKQLDLSLGERGNLEGLKSMQDLVDFKKNYEEIEINKRTAAENEFVLLKDDV  
DAAFMNKVELQAKVDSLDEVSFLRTLQYEMELSQM-QSHA--SDTSVVLMSD-NNRCLDL  
GSIIEAVKAQYEEIAQRSKSEAEALYQTKLQELQTAGRHGDDLNRNTKSEIMELNRMQR  
LRSEIDNKNQANLQTAIADAEQRGEMALKDANAKLQDLQALQKAKDDLARLLRQYQE  
LMNVKLALDVEIATYRKLL-EGE  
>Human\_K77  
EREQIMVNLNKKFASFDKVRFLQONQVLETKW-ELLQOQVNTS- ---TGT-NNLEPL--L  
ENYIGDLRRQVLDLSAEQMRQNAEVRSMQDVDFKKNYEEIEINKRTAAENEFVLLKDDV  
DAAYVSKVDLESRVDTLQTEVNFVFLYFLTELQVQV-THI--SDTNVILMSD-NNRSLDL  
DSIIDAVRTQYELIAQRSKSEAEALYQTKYELQVQTAGRHGDDLNRNTKSEIENRMIQR  
LRSEIDNKNQIEQMSLISDAEERGEQALQDAWKLQDLQLEALQKQKQDMARQLREYQE  
MLGVKLSLDVEIATYRQLL-EGE  
>Human\_K78  
ETQEIRTLNKKFASFDKVRFLQONKVLDTKW-HLLQOQGLS- ---GSQ-QGLEPV--F  
EACLQDLRQLEQLQGERGALDALKACRQDEEYKSKYEEIEAHRRATLENDFVLLKDDV  
DGVFLSKMELEGLKALREYLYFLKHLNEEELQQLQ-TQA--SDTSVVLMSD-NNRYLDF  
SSIITEVRRARYEIEARSSKAEAEALYQTKYELQVQTAGRHGDDLNRNTKQEIENRMIQR  
LQSQTENLKKQNASLQAAITDAEQRGELALKDAQAKVDELEAALRMKQNLARLLCEYQE  
LTSTKLSLDVEIATYRRL-EGE  
>Human\_K79  
EREQIKTLNKKFASFDKVRFLQONKVLDTKW-ALLQEQQNLG- ---VTR-NNLEPL--F  
EAYLGSMSRSTLDRLOSERGRDSELRNMQDLVDFKKNYEEIEINKRTAAENEFVLLKDDV  
DAAYMGMDLHGKVGTLTQEDIFLQQLYEMELSQVQ-THV--SNTNVVLMSD-NNRNLDL  
DSIIAEVKAQYELIAQRSAEAEAWYQTKYEELQVQTAGKHGDDLNRTRNEIAELTRTIQR  
LQGEADAANKQCCQLQTAIADAEQRGELALKDAQKGLDGLDVALHQAQKEDLTRLRDRYQE  
LMNVKLALDVEIATYRKLL-EGE  
>Human\_K80  
EKEEMKALNDKFAFLIGKVALEQRNQLLETRW-SFLQGD- ---SAI-FDLGHL--Y  
EYQGRLEELRKRVSQERGLEANLQVLEKVEFRIRYEIEISKRDMETFTVLLKDDV  
DAECLHRTLETKLSLESFVLMKTIYEQELKDLA-AQV--KDVSVTVGMD-SRCHIDL  
SGIVEVKAQYDAVAARSLEAEAYSRSQLEFEQARSAEYGSLSQSRSEIADLNVRIOK  
LRSQILSVKSHCLKLEENIKTAEQGLAFQDAKTKLAQLEAALQKQDMARQLREYQE  
LMNVKLALDIEIATYRKLV-EGE  
>Human\_K81  
EKEQIKSLNRSFAFDKVRFLQONKVLDTKW-QFYQNR- ---CCQ-SNLEPL--F  
EGYIETLRRREAECEVADSRLASELNVQVLEGEYKKNYEEIEVSLRATAENEFVLLKDDV  
DCAYLRKSDLEANVEALIQEIDFLRLRYEEELILIQ-SHI--SDTSVVKLD-NRSRLDM  
DCIIAEIKAQYDDIVTRSRAEAEAWYRSKCEEMKATVIRHGETLRRTRKEEINELNRMQR  
LTAEEVENAKQNSKLEAAVAQSEQQGEAALSARCKLALEALQKAKQDMARQLREYQE

VMNSKLGLDIEIATYRRL-EGE  
>Human\_K82  
EKEQIKLNRRFASFINKVRFLEQKNKLETKW-NFMQQOR-----CCQ-TNIEPI--F  
EGYISALRRQLDCVSGDRVRLSELSLQAALLEGYKYYEELSLRCPVENEFVALKKDV  
DTAFLEKADLETAALVQEDIDFLKSLYEEICLLQ-SQI--SSTSVIVKMD-NSRELDV  
DGI IAE IKAQYDDIASRSKAEAEAWYQCRYEELRVTAGNHCDNLRNRKNE ILEMNKLIQR  
LQQETENVKAQRCKLEGAIAEAEQQGEAALNDAKCKLAGLEALQKAKQDMACLLKEYQE  
VMNSKLGLDIEIATYRRL-EGE  
>Human\_K83  
EKEQIKSLNSRFAAFIDKVRFLQONKLETKL-QFYQNR-----CCQ-SNLEPL--F  
AGYIETLRREAECEVADSGLASELNHVQEVLEGYKYYEVALRATAENEFVALKKDV  
DCAYLRKSDLEANEVALIQEIDFLRRLYEEIRILQ-SHI--SDTSVVVKLD-NSRDNLN  
DCI IAE IKAQYDDIATRSRAEAEAWYQRYEEMKATVIRHGETLRRTKEEINELNRMQR  
LTAEVENAKQNSKLEAAVAQSEQQGEAALSARCKLAELEGALQKAKQDMACLIREYQE  
VMNSKLGLDIEIATYRRL-EGE  
>Human\_K84  
EKEQIKTLNRRFASFIDKVRFLQONKLETKW-SFLQEQK-----CIR-SNLEPL--F  
ESYITNRRQLQEVLDVSDQARLQAERNHQDVLEGFKKYEEVVCRAENEFVALKKDV  
DAAFMKNRSDLEANEVDTLQEDIDFLKTLYEEIQLLQ-SHI--SSTSVIVKMD-NSRDNLN  
DGI IAE IKAQYEEVARRSRADAEAWYQTYEEMQVTAGQHCNLRNIRNEINELTRLIQR  
LKAEIEHAKAQRKLEAAVAEAEQQGEATLSDAKCKLADLECALQKAKQDMARQLCBEYQE  
LMNAKLGLDIEIATYRRL-EGE  
>Human\_K85  
EKEQIKSLNSRFAAFIDKVRFLQONKLETKW-QFYQNR-----CCE-SNLEPL--F  
SGYIETLRREAECEVADSGLASELNHVQEVLEGYKYYEVALRATAENEFVALKKDV  
DCAYLRKSDLEANEVALIEESSFLRRLYEEIRVLQ-AHI--SDTSVIVKMD-NSRDNLN  
DCI IAE IKAQYDDIVASRSRAEAEAWYQRYEEMKATVIRHGETLRRTKEEINELNRMQR  
LTAEVENAKQNSKLEAAVAQSEQQGEAALSARCKLAELEGALQKAKQDMACLIREYQE  
VMNSKLGLDIEIATYRRL-EGE  
>Human\_K86  
EKEQIKSLNSRFAAFIDKVRFLQONKLETKL-QFYQNR-----CCQ-SNLEPL--F  
EGYIETLRREAECEVADSGLASELNHVQEVLEGYKYYEVALRATAENEFVALKKDV  
DCAYLRKSDLEANEVALIQEIDFLRRLYEEIRVLQ-SHI--SDTSVVVKLD-NSRDNLN  
DCI IAE IKAQYDDIVTRSRRAEAEAWYQRYEEMKATVIRHGETLRRTKEEINELNRMQR  
LTAEVENAKQNSKLEAAVAQSEQQGEAALSARCKLAELEGALQKAKQDMACLIREYQE  
VMNSKLGLDIEIATYRRL-EGE  
>Frog1\_K18  
EKETMQNLDNRLASYLKVRLEAANKLELVQIRQHTKKGPS-----KDWSPY--Y  
KT-IEDLRKQVFDSTLENSQLVLQIDNARLAADDFRKYEAEMAIRMSVEGDI TGLRKL  
DDTNVSRMNLNEIESLKEELIFLKKNHQDDVTELQ-AQV--ARSAVTVEVD-APKSDQL  
GKIMTELRAQYDGLAQKNRDVEKWKYQSKVDHTVQVNLDTALHSKSSVTDLRVTQS  
LEIELESLRNKQASLEGTLDHTEARYAMELEMLGGTAMAMEAELVQVRSDCQRQQYQQA  
LLNTKMKLEAIEIHYRRL-EGD  
>Frog1\_02\_13C  
---MQNLDNRLAAYLNKVRLEAANSLECKIREWYKHRNAC---MPD-RDYSKY--Y  
HI-IEDLRKQIQCASVENARVILQIDNARLAADDFRKYENELCLRHGVEADINGLRKL  
DELNLAKCDLESQIESLTDIEIACLKNHEEEMKGYQ-GAT---GHLSVEMK-AAPGNDL  
TKHLNDRMAEYELAEKNRKAEARFNEASRALKQEISCGAEQIQCSKNEITDLKRNLA  
LEIDLQALAMKKTLECSLAETEGNYCVQLSKIQAISALEQQLCEVRTDMEQSIYEYQ  
LLDIKTRLEMEIETYRRL-DGE  
>Frog1\_03  
EKQTMQNLNDRLASYLKVRLEAANKLELVQIRQHTKKGPS-----EAP-RDYSKY--F  
KE-IEALKKQIIAASKQNAVILLQCDNARLAADDFRKYEFENEQAIRYSVEADINGLRRV  
DDLTLRSRAELQEGLESLELAEYLKKNHDEVRISKVTEA---GKVSVMEM-AAPSNL  
TKRLNDRMAQYEDLARNNRQAEENPNRISADLKNQMHVQITMDESRTVETNLKKTQS  
LQIELQSLQAKNSLEILLAEATEARFCMKLSHLQETIACVEQLRLEQLRAESECQTEYQ  
LLEMKTLEGEIETYRSL-D--  
>Frog1\_04  
EKQTMQNLNDRLASYLKVRLEAANKLELVQIRQHTKKGPS-----KDYSKY--Y  
KD-IEDLKAKIIAASKENAALLQCDNARLAADDFRKYESELHLRQTVADINGLRRV  
DELNLAKTDLDSQFGLTEELASLKNHEDEVKGVQVTEA---GKVSVMEM-AAPSNL  
TKRLNDRMAQYEDLARNNRQAEENPNRISADLKNQMHVQITMDESRTVETNLKKTQS  
LQIELQSLQAKNSLEILLAEATEARFCMKLSHLQETIACVEQLRLEQLRAESECQTEYQ  
LLEMKTLEGEIETYRSL-D--  
>Frog1\_05  
-XXXMQNLDNRLANLYLKVLEAANAELERKIKEWYDKQPTTS---DGG-KDYSKY--Y  
SL-IDBLNLIKITNATKDNAGITLQADNARLAADDFRKNKYENERALYQMMNDINGLRRV  
DDFTLSKFDLESQFEGLFEEVFIKKNHDEIKGTQNTKL---SQVSVEMK-AQPCTDL  
TKILNDRMAQHEALAEKNRREAEADRYNTMTAELRQISAGAGMQASKTEISERKRLQA  
LETDLHSLKSMKQSLMLAETEGYICMKLSRIQVTISSIEHQAQLKADSESQHSYQYQ  
LLGIKTRLEMEIETYRRL-DGE  
>Frog1\_06  
EKQTMQNLNDRLASYLKVRLEAANKLELVQIRQHTKKGPS-----SDGGKYDNYK--Y  
SL-INELNLIKILNAALDNEALALHCENAKLAAEDFRKYSEWTLQAVVSDINGLRKL  
DDLTLRSRAELQEGLESLELAEYLKKNHDEIKGTQ-NT---KLSQVSVEMK-AQPCTDL  
TKILNDRMAQHEALAEKNRREAEADRYNKMSAELRQISAGAGVQVQTSKTESELKTLQA  
LEIELQSLQAKNSLEILLAEATEARFCMKLSRIQVTISSIEHQAQLKADSESQHSYQYQ  
LLGIKTRLEMEIETYRRL-DGE  
>Frog1\_07  
KKQTMQNLNDRLASYLKVRLEAANAELERKIKEWYDKQRTS---DGG-KDYSKY--A  
TL-IDDLKILKILSTTKDNRIPLQSDNARLAIDNFRKYENELIHLHSMEEAINTLHRV  
DDLTLRSRAELQEGLESLELAEYLKKNHDEIKGTQ-KAT---RGQVSVEMK-ATPCTDL  
TKILNDRMAQHEALAEKNRREAEADRYEKLSADLQRIAGAGRVQTKSEISELQRTLRA  
LEIELQSLQAKNSLEILLAEATEARFCMKLSRIQVTISSIEHQAQLKADSESQHSYQYQ  
LLGIKTRLEMEIETYRRL-DGE  
>Frog1\_08  
EKQTMQNLNDRLASYLKVRLEAANAELERKIKEWYDKQRTS---DGG-KDYSKY--L  
PI-IEDLRKIMESTLENAKILLQTDNARLAADDFRKYENELALRQSVQVSDINGLRKL  
DELTLCKADLELQIESLTDIEIAYLKNHEEEMSIK-SSA---AGQVTVEMD-AAPGVDL  
TKILNDRMAQYETLAEKNRREAEARFNEQSKDIKKEILAGVQVQVQSNTEISDLKRSQ  
LEIELQSLQAKNSLEILLAEATEARFCMKLSRIQVTISSIEHQAQLKADSESQHSYQYQ  
LLDIKTRLEMEIETYRRL-EGE  
>Frog1\_09  
DKQTMQNLNDRLASYLKVRLEAANAELERKIKEWYDKQRTS---AGA-KDYSKY--F  
DI-ITDLRSKILFATIDNRSRVVLQIDNARLAADDFRKYENELALRQSVQVSDINGLRKL  
DELTLARGDLEMQIESLTDIEIAYLKNHEEEMSIK-SSA---AGQVTVEMD-AAPGVDL  
TKILNDRMAQYETLAEKNRREAEARFNEQSKDIKKEILAGVQVQVQSNTEISDLKRSQ  
LEIELQSLQAKNSLEILLAEATEARFCMKLSRIQVTISSIEHQAQLKADSESQHSYQYQ  
LLDIKTRLEMEIETYRRL-EGE  
>Frog1\_10  
EKHAMQNLNDRLASYLKVRLEAANAELERKIKHWYDKVVDAGI---GAGSKDYSKY--F  
EI-INELRSKIGATVGNATVTLQIDNARLAADDFRKYENELALRQSVQVSDIAGLRV  
DELTLARGDLEMQIESLTDIEIAYLKNHEEEMSHAK-SQS---AGKVSVMEM-AAPGVDL  
TKILNDRMAQYETLAEKNRREAEARFNEQSKDIKKEILAGVQVQVQSNTEISDLKRSQ

LEIELQSQLAMKQSVBGNLSEVQGFYSAQLLQIQTNTISSLEEQLLQIRSDMEHQNMHEYKQ  
LLDIKTRLEMBIETRYRLL-EGE  
>Frog1\_11  
EKHAMQNLNDRLASYLEKVRLEASNADLEKGIKRTWHEKQTGTGLGAGS--KDYSKY--F  
EI-ISELRGKIHGATVDNATVTLQIDNARLAADDFRKLFENELALRQSVSEADIGLRRVL  
DELTLARGDLEMQIESLTELAYLKNHEEEMMHAK-SQS--AGKVSVEVD-AAPGVDL  
TNILNMRADYEILAEKNRRDAELWFTQKSGELKKEISVGVQVQASKSEITELKRSLS  
LEIELQSQLAMKQSVBGNLSEVQGFYSAQLLQIQTNTISSLEEQLLQIRSDMEHQNMHEYKQ  
LLDIKTRLEMBIETRYRLL-DGE  
>Frog1\_12  
EKQTMQNLNDRLATYLEKVRSLKSNKIELQIKWEHNSKNAG----VGE-KDYQGY--Y  
KT-IEALQNEILNSTVMNAELLLKIDNARLAADDFRKLFESERSLKI GVEKDIIGLRRLL  
DDLNLQRIDLEHQYESLQENLAYLRKNHEEASVLR-NQI--TGHINVEVD-AAPGVDL  
AKVLADMRAQCEAVVSKIKQDAKQFETQIEEVNIQIGGNVTELEKHRSSVKEVSRHVQS  
LEIELQSEISKDALNATLNNINAQYAAQLLHMOTAICIEEQLIQIRSDMSRQSEYEI  
LLNIKLRLEMBIETRYRLL-EGE  
>Frog1\_13  
EKHTMQNLNDRLAAYLDKVRLEATANHHLEVQIKWEYANMHCY---KER-NDYSKY--M  
VV-IEELRQITNGTPANARILLQIDNARLAADDFRKMYENELALRQSVSEVDNGLRRVL  
DELTLARSDLELQLEGLNEELAFKKNHQEIESSIK--V--GSGQVTVEVD-AAPAVDL  
TLLNMRADYEIVVAEKNRKVEEWFLLKSAALKQDILIEAQEVQSSHSEISELKRQTQT  
LEIELQALSMKSSLEGTLESETEGRYCLSLSQIQMRISSEIEQLHQIRMDMSRQNEGYLR  
LLDVKTRLEMBIETRYRLL-EGE  
>Frog1\_14  
EKETMRNLNDRLATYLEKVRSLKANAELQKIKWEYQNSG----FGK-RDDAHY--F  
QV-IEELTKQIVNAKMEGKLLQMDNATLALDDFKMKLEYELNLGAAVEKDLSELKRVV  
DDLTMTRTDLESQIESLKEEMVYLLKNHTQDMVGLH-KQE---GTIDVEVD-AAPGVDL  
GKTMEDMSRQYELVEKQRLKAKYGFDRKVEEWNVEVQNTAELEKCRKDLSELKHKVQD  
LEIESQALSKRKAAGNALDNVNSRYTMEADKQEKIARFEEHLQQTTRDVGFQIQEFTI  
LFDLKNRLEMBIETRYRLL-DAE  
>Frog1\_15  
GKTMQNLNDRLASYLEKVRSLKANAELQKIKWEYQNSG----NKH-RDYSKY--E  
KT-IEELQSQLVDGHHMNAKIKLQMDNATLALDDFKMKLEYELNLGAAVEKDLSELKRVV  
DDLTMTRTDLESQIESLKEEMVYLLKNHTQDMVGLH-KQE---GTIDVEVD-AAPGVDL  
AKTIAEIRKEYETLIEKNRREASEWYS-----  
-----HKGLEGLTAEATEANAAGLQIQATICRMEAELESNVGRGELERQNIERYA  
LLDVKTRLEMBIETRYRLL-EGD  
>Frog1\_16  
EKETMQNLNDRLANYLGRVRSLEENQGFERRIREWYDKQVP----YNF-PDFNFF--F  
RT-IEELQNLILHACTGNANLILQIDNARLAADDFRKLFENELALRQSVSEADIGLRRVL  
EELNLGNNDQEIQRQNLSEELTYLKNHAEVEVGSRL-TQL--GARVNVEMN-AAPAVDL  
NQVLGEBIRDQYETIVERNRRAEAWFLLKSEELNQMNSSADQLQTVHTEVQLRNTVQG  
LEIDLQSQNSMRSALEGLTADTESRYGGQLSQQLFLNNVETQLGSLRSDLERQNFYKA  
LMDVKTRLEMBIETRYRLL-DGE  
>Frog1\_17  
EKYTMQNLNDRLASYLEKVRSLKANAELQKIKWEYQNSG----AVSEQSFGTL--Y  
TT-IEELRQKILAAITINNSKLVLEIDNARLAADDFRKLFENELALRQSVSEADIGLRRVL  
DDLTMTRSDLELQIESLKEELTYLKNHAEVEVSEKK-QHA--AGTVSVELD-AVPGVDL  
LNTLNDLREQYIESIADRNRRAEAWFLLKSEELNQMNSSADQLQTVHTEVQLRNTVQG  
LEIELQSQLSAKAGLEASLAETEGRYAAQLFIQNIISSEEAQLSDLRSDLERQNFYRT  
LLDIKTRLEMBIETRYRLL-EGQ  
>Frog1\_18  
EKSTMQNLNDRLSNYLEKVRSLKANAELQKIKWEYQNSG----VHE-QNYLPY--F  
AT-IEELRQKILAAITINNSKLVLEIDNARLAADDFRKLFENELALRQSVSEADIGLRRVL  
DMLTCSRADLELQIENLKEELTYLKNHAEVEVSEKK-QHA--AGTVSVELD-AVPGVDL  
TKILSEMRENQYIESIADRNRRAEAWFLLKSEELNQMNSSADQLQTVHTEVQLRNTVQG  
LEIELQSQLSMKAALEASLAETEGRYAAQLFIQNIISSEEAQLSDLRSDLERQNFYRT  
LLDIKTRLEMBIETRYRLL-EGH  
>Frog1\_19  
EKETMQNLNDRLAMYLKVRLEASNADLEKGIKRTWHEKQTGTGLGAGS--KDYSKY--F  
AI-IEELRQKILAAITINNSKLVLEIDNARLAADDFRKLFENELALRQSVSEADIGLRRVL  
DELTLCRTDLEHQIESLKEELTYLKNHAEVEVSEKK-QHA--AGTVSVELD-AVPGVDL  
NKKLAEMRQYIESIADRNRRAEAWFLLKSEELNQMNSSADQLQTVHTEVQLRNTVQG  
LEIELQSQLSMKAALEASLAETEGRYAAQLFIQNIISSEEAQLSDLRSDLERQNFYRT  
LLDIKTRLEMBIETRYRLL-EGH  
>Frog1\_20  
--MTMQNLNDRLANYLKVRLEASNADLEKGIKRTWHEKQTGTGLGAGS--KDYSKY--F  
KT-IDDLQNKIIAAYANNHKAIIAVDNTRLTIDYRLKYENELALRQSVSEADIGLRRVL  
DDLTLCKSDLEAQVESLTELAYLKNHAEVEVSEKK-QHA--AGTVSVELD-AVPGVDL  
SKSMADMRAEYELKAEYRRVEEWFLLKSEELNQMNSSADQLQTVHTEVQLRNTVQG  
LEIELQSQLSMKAALEASLAETEGRYAAQLFIQNIISSEEAQLSDLRSDLERQNFYRT  
LLDIKTRLEMBIETRYRLL-DAQ  
>Frog1\_21  
EKITMQNLNDRLATYLNKVKSLKANAELQKIKWEYQNSG----VQE-KDYGPF--Y  
RT-IEDLQKILGATIDNGRIVLQIDNARLAADDFRKMYENELALRQSVSEADIGLRRVL  
DDLTLNRSDESQLENLKEELAGLKNHEEEMKALK-VQL--VGDVTVDK-AAPGIDL  
QKVLGDLRHDYEQIMQKQKIDIEFWYQKTAELRKNVSGSTQEQIQTNTQVTELRRLTQ  
LEIDLQALSTKAALASLAETEGRYAAQLFIQNIISSEEAQLSDLRSDLERQNFYRT  
LLDIKTRLEMBIETRYRLL-DGQ  
>Frog1\_22  
EKYTMQNLNDRLAAYLDKVRSLKANAELQKIKWEYQNSG----GPA-ADYSKY--Y  
KT-IEDLRNKLISATMDNAGLLQIDNARLAADDFRKMYENELALRQSVSEADIGLRRVL  
DDLTLNRSDESQLENLKEELAGLKNHEEEMKALK-VQL--VGDVTVDK-AAPGIDL  
TKTLAEMRQYIESIADRNRRAEAWFLLKSEELNQMNSSADQLQTVHTEVQLRNTVQG  
LEIELQSQLSMKAALEASLAETEGRYAAQLFIQNIISSEEAQLSDLRSDLERQNFYRT  
LLDIKTRLEMBIETRYRLL-EGE  
>Frog1\_K117  
GKTMQNLNDRLASYLEKVRSLKANAELQKIKWEYQNSG----IGS-PDVSFY--Y  
NI-INLLRSQINDASIDNARLVLQIDNARLAADDFRKMYENELALRQSVSEADIGLRRVL  
DELTLNRSDESQLENLKEELAGLKNHEEEMKALK-VQL--VGDVTVDK-AAPGIDL  
SQIMSDVRAQYEGMMEKRNQVEAWYRGQSENLNKEVATNTAALQTSKSIQITDLKRTIQS  
LEIELQSQLSMKAALEASLAETEGRYAAQLFIQNIISSEEAQLSDLRSDLERQNFYRT  
LLDIKTRLEMBIETRYRLL-EGE  
>Chicken\_K12  
KKTMQNLNDRLAAYLDKVRSLKANAELQKIKWEYQNSG----GPA-ADYSKY--Y  
PI-IEDLRNKLISATMDNAGLLQIDNARLAADDFRKMYENELALRQSVSEADIGLRRVL  
DELTLNRSDESQLENLKEELAGLKNHEEEMKALK-VQL--VGDVTVDK-AAPGIDL  
TKLNDMRQYEVIAEQNRKAEAWFLLKSEELNQMNSSADQLQTVHTEVQLRNTVQG  
LEIELQSQLAMKKSLEDTLAEETEGGYCAQLSQMLQIQNLNVEAQLSDLRSDLERQNFYRT  
LLDIKTRLEMBIETRYRLL-DGE  
>Chicken\_K20  
EKSTMQNLNDRLAAYLDKVRSLKANAELQKIKWEYQNSG----GVR-SDYSKY--F  
QT-IEDLQSKIGAAQLNARLVLQIDNARLAADDFRKMYENELALRQSVSEADIGLRRVL  
DDLTLNRSDESQLENLKEELAGLKNHEEEMKALK-VQL--VGDVTVDK-AAPGIDL

ASIMENMRQYEMAEKNRQBEAKERFEKQTEALNQEVAINVEQLQEORREVTDRRQICQS  
LELELQTHLNMKKPLEDTLAEATARYSFLAQIQETIAKLEAQLRQLRADMEAQNTYESV  
LLDIKTRLEBIATYRRLLE-EGE  
>Chicken\_K23  
EKQTMQNLNDRLAAYLDKVRSLAANAQLESCILEWHKTKSH----GKR-HDFNQY--E  
QN-VTDMQRQIEDGKIITNASILLQIDNANMASEDPRKLYEAKTRRQVQCLENLREKEL  
DGLTIITDLEMEIEGLREEHILRRKDHEEDMEANR--SSQ---DFKVNKVN-APPPEDL  
TKILAEIRREYEAIEKNRQSLDSWKYELSTAVSLAADPNPEQVQSSSENEIKDLTRTLQS  
LDIELQAQMSKHKHMLDLDLADTRNYVAVALQNMQQTISKCEEELSQRHDIRQHNQYRV  
LLGIKTRLEKBIATYRRLLE-EGN  
>Chicken\_K15  
EKITMQNLNDRLATYQKVRLEADANAELVKIRDWYQKEAPS----SPA-RDYSNY--Y  
KI-IEDLQDKILAATIDNSRVVLEIDNARLAADDFRKLKHENELPLRQSVESDINGLRRVL  
DELTLRADLEMQIESLKEELAYLKKNHEEEMKEYS-NQL--SGKVSVEVD-AAPGIDL  
TRILSEMRQYEAALAEKRYKDAEAWFLTQTEELNHEVATHTEIQSSKSEITELRRTMQS  
LEIELQSQISMKAGLEANLRDTEGRYCAQLAQIQNLITSVQEQLSEIRCDMERQNYEYRM  
LMDIKSRLEQBIATYRQLL-ETQ  
>Chicken\_K19  
EKITMQNLNDRLASYLKVRLEEDNALELHIREWYKQGP----GPA-RDYSY--Y  
KA-IEDLRDQILAATIDNSKVVLIQIDNARLAADDFRKFETEALRMSVEADINGLRRVL  
DELTLARTDLELQIENLKEELAYLKKNHEEEMSAIG-GQV--AGQVSVVEVD-SAPGIDL  
SKILADMQRQYEHMAEKNRKDAEAWFHSKTEELNREVAVNTQEQSSKSEVTDLRRTLQG  
LEIELQSQLSMKGALSTLADTEGRYGAQLAQIQDMIGSIEAQLAELRADMERQNSYKYM  
LMDIKTRLEQBIATYRQLL-EGQ  
>Chicken\_K9L1  
EKITMQNLNDRLASYLKVRLEEDNALELHIREWYKQAP----SVS-KDYSSY--Y  
QT-IEQLQNOQIIISATVDNRRMLLDIDNSKMTADDFRMYENELVIRQSVESDVNGLRNL  
DDLTHTRSSLESELESLKEELIALKRNHEEELRQLQ-SQT--GGDVSVVEVN-AAPGEDL  
TKILNDRNEVEYEQIEKNRREVEQWYEVKIEEVNRQVTSSSQDIQTSSHQTELKREMQN  
LEIELQAQLSTKNSLENSLAETESRYGCLLQIQGQINSVEEELANIRCEMEGQNYEYKM  
LLGIKTRLEQBIATYRALLNEGQ  
>Chicken\_K9L2  
EKITMQNLNDRLASYLKVRLEEDNALELHIREWYKQAP----SVS-KDYSSY--Y  
QT-IEQLQNOQIIISATVDNRRMLLDIDNSKMTADDFRMYENELVIRQVTEVDINGLRRNL  
DDLTLVRSLESELESLKDELIALKRNHEEELRQLQ-SQT--GGDVSVVEVN-AAPGEDL  
TKILNDRNEVEYEQIEKNRREVEQWYEVKIEEVNRQVTSSSQDIQTSSHQTELKREMQN  
LEIELQAQLSTKNSLENSLAETESRYGCLLQIQGQINSVEEELANIRCEMEGQNYEYKM  
LLGIKTRLEQBIATYRALLNEGQ  
>Chicken\_K9L3  
EKITMQNLNDRLASYLKVRLEEDNALELHIREWYKQGP----TGS-KDYSQY--Y  
RT-IEELQNOQIVGANVDLNRMLLDIDNTRMTVDDFRKYETEYTLHQSVASDINGLRRPL  
DQLTLRSRDLTQFESLKEELIYLLKRNHEEEMRGLQ-TQS--SGDVNVEVN-ATPGTNL  
MEKLNEMRCQYERLIEENRREVEQWYEVKIEEVNRQVTSSSQDIQTSSHQTELKREMQN  
LEIELQSQLSMVDLSQSNLEDTERRYNMQLQIQGQIGMIGLEELASIRCEMESQNYEYKM  
LLGIKTRLEQBIATYRALL-EGG  
>Chicken\_K9L4  
EKITMQNLNDRLASYLKVRSLERENARLEQLIREWYKQGP----TGR-KDYSHY--Y  
TT-IEDLQNOQILTAAVETNKILLDLDNTRMTADDFRKYETEYGLRQNVADINTLRRPL  
DSLTLRSRDLTQFESLKEELIYLLKRNHEEEMRGLQ-TQS--SGDVNVEVN-AAPGEDL  
LKKLNDRNEVEYEQIIQKNREVEQWYEVKIEEVNRQVTSSSQDIQTSSHQTELKREMQN  
LEIELQSSELVRGALQSNLEDTERRYNMQLQIQGQIGMIGLEELASIRCEMESQNYEYKM  
LLGIKTRLEQBIATYRALLNEGQ  
>Chicken\_HAS1  
EKVITMQNLNDRLASYLKVRKLEKENAELECRIREWYATQGLS----CEP-RDYSCY--Y  
KE-IEDLQNOQIVCATIDNNKIILLIDNSRMAADDFRKYETEYELALRQSVADINGLRRVL  
DQLTLRSDLEAQLESLREELCCLKRNHEEEMNCLR-KQS--TGDVSVVEVN-ACPGPDL  
RQILEDLRCQYETLARNRKEVEWYEVKIEEVNRQVTSSSQDIQTSSHQTELKREMQN  
LEIDLQAQLSQRNLESSLAEETECQYNTLLGELQNOQITCVEQQLAEIRAEIQCQNYEYKT  
LLDVKCRLEQBIATYRCLL-EGG  
>Chicken\_HAS2  
EKVITMQNLNDRLASYLKVRKLEQENADLECRIREWYKQGP----CEP-RDYSCY--Y  
KE-IEDLQNOQIVCATIDNNKIILLIDNSRMTADDFRKYETEYELALRQSVADINGLRRVL  
DQLTLRSDLEAQLESLREELCCLKRNHEEEMNCLR-KQS--TGDVSVVEVN-ACPGPDL  
RKILEEMRCQYETLERNRKEVEWYEVKIEEVNRQVTSSSQDIQTSSHQTELKREMQN  
LEIDLQAQLSQRNLESSLAEETECRYNHLGELQNOQITCVEQQLADLRAEMECQNYEYKI  
LLDVKCRLEQBIATYRCLL-EGG  
>Chicken\_HAS3  
EKATMQNLNDRLASYLKVRLESENAELECRIREWYKVGPS----CEP-RDYSCF--H  
KE-IEDLQNOQILCAAMETNKILLIDNSQMTAEDFRKYEYELALRQNVADIDNLRPVL  
DQLASCKADLQLECAVEATEEMCCLRANHEEEMNCLR-KQA--TGDVSVVEVN-ACPGPDL  
RKILEEMRCQYETLERNRKEVEWYEVKIEEVNRQVTSSSQDIQTSSHQTELKREMQN  
LEINVQAQLTMKENLESSLAEETECRYNHLGELQNOQITCVEQQLADLRAEMECQNYEYKS  
LLDVKCRLEQBIATYRCLL-EGG  
>Chicken\_K14L1  
EKETMQNLNDRLAAYLDKVRLEAEANTDLEVKIREWYKQGP----GPE-RDYSY--Y  
RT-IEELRSKILAAATVENANIVLQIDNARLAADDFRKFETEALRQSVADINGLRRVL  
DELTLRADLEMQIENLKEELAYLKKNHEEEMNALR-GQV--GGEISVEMD-AAPGIDL  
TKILAEIRREYEAIEKNRQSLDSWKYELSTAVSLAADPNPEQVQSSSENEIKDLTRTLQS  
LEIDLQSQLSKAALBEGTLADTEARYGTQLAQLQALITSVQEQLAELRCDMERQNYEYRV  
LLDVKCRLEQBIATYRRLLE-EGE  
>Chicken\_K14L2  
EKETMQNLNDRLAAYLDKVRLEAEANTDLEVKIREWYKQGP----GPE-RDYSY--Y  
RT-IEELRSKVLGATVDNANLLQIDNARLTADDFRKFETEALRQSVADINGLRRVL  
DELTLRADLEMQIENLKEELAYLKKNHEEEMNALR-GQV--GGEISVEMD-AAPGIDL  
TKILAEIRREYEAIEKNRQSLDSWKYELSTAVSLAADPNPEQVQSSSENEIKDLTRTLQS  
LEIDLQSQLSKAALBEGTLADTEARYGTQLAQLQALITSVQEQLAELRCDMERQNYEYRV  
LLDVKCRLEQBIATYRRLLE-EGE  
>Chicken\_K18  
EKETMQDLNERLATYLEKVRLENNRRLEAQIRESLAKRG-----PST-RDWGNY--W  
DT-IQQLRDKIYDSAVENARTVLQIDNARLAADDFRKYEAELAIRTSVESDISGLRKKVL  
DDTMARLQLEGEIEALREELIFMKKNHEEEMNALQ-GQA--ASAGLTVVEVD-APQAQDL  
GQALAEARQYDALAKKNVELEKQWQIQISETTLEVTQSTKEVDTARSRLLELRSSVQS  
LEIDLDAQRKQKLEGLSLEAETARYGAQLQQLILRGEELAQARAEQLQRQNRHCA  
LQDAKSKLEAEBIATYRALL-EGG  
>Alligator\_K24  
EKETMQNLNDRLANYLKVRLEAEANADLEYKIHQWYKHPGAAA--ELT-RDYSKY--Y  
QI-IEDLRNQIISATIGNASIVLQIDNSQLAAEDFRKYENELPLRQSVESDINGLRRVL  
DDLTIKSNLEAQLESLELVLKKSHEEEMKSLK-STSS--TGDVNVIEIN-AAPGIDL  
TKLLNDRMQYESLAEQNRREAEQFNKMSQPLQKQIYDDAGAVSSATNELTEMKRTIQG  
LEIELQTVMAQKCSLEGTLEARTENYSAQLSQRLHISNLEQLQQRSEMECQNAEYEQ  
LLGIKIRLEMBIETYKRLLE-DGE  
>Alligator\_K10L  
EKETMQNLNDRLASYLKVRQALEEANAELHKKIDWYETLGSYTE--GGG-RDYSKY--Y  
TT-IEDLRNQIIAATVENASIIILQTDNARLAVDDFRKYENELYLQRNVADIRGLRKKVL

DEQTLAKSNLEIQIESLADEVAYLKKNEHEEMNDR-SSA---SPDVNVEIN-TAPGIDL  
TTRLNKMRTEYEAALAEQNKRKDVETWPNKSKELNVQINFSAEETNTNSQITELKRTFQG  
LEIEMKSQLAKQSLAETLAEATEARYCAQLSQIQVVISSVETQIQQIRDDMEWQNAEYEQ  
LLDIKHLENEIETRYRHLI-DRE  
>Alligator\_K12  
KKEQMQLNDRLAAYLDKVRSLAEANTELEHKIREWYKNGPAGSLGAG-NDYSKY--Y  
PI-IEDLRNKIINATIDNARIVLQIDNARLAADDFRKYENEVALRQSVREADINGLRRVL  
DELTLTRADLEMQIESLNEELAYLKKNEHEEELQGFQ-GNA---TGQVSVEMD-AAPGIDL  
TKLLNDRMQYEAIAEQNRKDAEAWFNKSGELKKEISTNTEQLQSGRSEITDLKRTLQS  
LEIELQSQLMKALEDTEAETAGYCTQLSQMLQIQGNLENQLQVVRADMERQNAEYEQ  
LLDIKTRLEMEIETRYRLL-DGE  
>Alligator\_K20  
EKLTMQNLNDRLASYLEKVSLEKTNQLEKQIREWYANNSS----STR-QDYSPY--Y  
NT-IEELRNKIGAAQLENARLILQIDNAKLAADDFRMKYESELAIRQGAENDTAGLLKVI  
DDLTLTKADLESQVEMTEELAFKKNHEEVEDRLR-KQL---GGTVNVEVD-AAPSIDL  
AKIMENMRQYQESMAQNRQEAADRFRQTEELNQVAVNTEQLNSKTEITDLKRTFQS  
LEIELQSQLSMKKALEDTEAETAGYCTQLSQMLQIQGNLENQLQVVRADMERQNAEYEQ  
LLDVKTRLEMEIATYRLL-EGE  
>Alligator\_K23  
EKQMMQNLNDRLAAYLDKVRSLAEANAQLESCIVEWHKRRSH----GKR-YDFNQF--E  
QS-IADMQQIQDGKISNASEVLLQIDNAKLAESEFRKLYEAEKYQREGQVDFVENLRKEL  
DNLTIVTTDLEMEIEGLREEHILRKKDHEADMHEQR-STK---DVNVNKKVK-ATPPEDL  
TKILAGIREDEYEAIEKNRRGLDVVYKQQTSAASLAVTNSPEQLQNNKKEIKNLKRFQA  
LEIELQSQLSKKHALENTLSETRAHYASRLQNIQEFISKCEEELSELRHVRCQSNKYK  
LLGIKTRLEMEIETRYRLL-EGE  
>Alligator\_K36L1  
GKEMQLNDRLASYLEKVSLEKENTDLERKIREWQECQTP----LVC-TDFSSC--Y  
ST-TEELQQQICSAENARLRDIDIVKVASDDFSFKYEEGCLQSAEADISLHRFL  
DDLTLCKADLETELESLEELCLRNHEEASPLR-HQL---GDCINVELD-TAPSCDL  
NKVLEEIRQYETLVEKNQCEVEDWYHTQMEELNKEVISDEEQQLGQCQNEIIQLKHTVQA  
LEIDLQTHLNTALENTLTDTEARYSHQSELQCLISNMEAQLAELRSNIHQNSYK  
LLDVKSQLDCEISAYRLL-DEE  
>Alligator\_K36L2  
EKETMQFLNDRLASYLEKVRFLQENADLEYKIREWYECQTP----YVY-TDFNVC--Y  
KM-TEELQQQICCAKADNARLCLDVNKLKVASDDYATKYEYEHGLQCSAEADVSLRRL  
DDLTLCKADLETELESLEELCLRNHEEASPLR-RQL---GDRINVELD-AAPSCDL  
NKVLEEIRQYETLVEKNQCEVEDWYHTQMEELNKEVISSGEQLGQCQNEIIQLKHTVQA  
LEIDLQTHLNTALENTLTDTEARYSHQSELQCLISNMEAQLAELRSNIEHQNGEYK  
LLDAKQQLDCEISVYHSL-DVE  
>Alligator\_K36L3  
EKETMQFLNDRLASYLEKVRHLEQENADLECKIREWYECQVP----YVC-TDFQAF--Y  
KT-TEELQQQICCAKADNARLCLDVNKLKVASDDYATKYEYEHGLQCSAEADVSLRRL  
DEFTLCLADLETELESLEELCLRNHEEASVLR-CQL---GARVINVELD-AAPSCDL  
NKVLEEIRQYENLVENNRKDVAEAWFSTKMEELNQVVISSGEQLGQCQTEITDLRRTIQA  
LEIDLEAQTSMKSTLECTLHETENRYASQLAHLQCLITNVEAQLAELRCDIERQNEYK  
LLDVKTRLEMEIATYRLL-EGE  
>Alligator\_K15  
EKITMQNLNDRLASYLEKVRLEEANADLEVKIRDWYQKQGP----SPA-RDYSPY--Y  
KT-IEDLRNKILAATIDNSRIILEIDNARLAADDFRKYENELYLQSVREADINGLRRVL  
DELTLARADLEMQIENLKEELAYLKKNEHEEMREYS-NQM---TGKVSVEVD-AAPGVDL  
TKVLAEMRQYEAALADKNRREAEAWFSTKTEELNREVATSTEQIQTSSKSEMTERLRTLQ  
LEIELQSQLSMKAGLEANLADTESRYCAQLAQLQAMITSIIEQLAELRCDIERQNEYK  
LLDIKTRLEMEIATYRLL-DGQ  
>Alligator\_K19  
EKITMQNLNDRLASYLEKVRLEEANSELEIKIRDWYQKQGP----GPS-RDYSPY--Y  
KT-IEDLRNKILAATIDNSKIVLQIDNARLAADDFRKYENELYLQSVREADINGLRRVL  
DELTLARADLEMQIENLKEELAYLKKNEHEEMNAHA-GQA---GGQVSVEMD-SAPGIDL  
TKVLAEMRQYEFMAEKNRKDAEGWFNKTEELNQEAVNTEQLQTSRTEITDLRRTLQ  
LEIELQSQLSMKAALECTLADTENRYGAQLSQIQCLISNIEAQLGLDRAEMERQNSYK  
LMDIKTRLEMEIATYHQL-EGQ  
>Alligator\_K9L1  
EKTTMQNLNDRLATYLDKVRLEEENADLEERIREWYKQGP----SIS-KDYSPY--Y  
QT-IEQLQNIISATVDLNKVLIDIDNSKMIADDFRKYENELAIRQGVREADINGLRRVL  
DELVVRSTLELEVEVTLKDELLTLKKNHEEEMRLQ-SQT---GGDVNVEVN-AAPGDL  
TKILNDRMQYEEIIAKNRREVEQWYEVKMEVNVQVTSVSGQEVQTSVSHQTELRVYQS  
LEIELQSQLSMKASLENNLAETARYGAQLQIQAMINCEVEELAQLRCEMESQNEEYK  
LLGIKTRLEMEIATYHQL-EGQ  
>Alligator\_K9L2  
EKMTMQNLNDRLASYLEKVRHLEEENANLERLIREWYQNHGP----QCG-RDYSQY--Y  
GP-IEDLNQNIISATVDLNKVLIDIDNTRMTADDFRKYETEYSLRQVVEGDINGLRRPIL  
DQLTLARSDELAQYESLKEELISLKNHEEEMRGLQ-SQS---GGDVNVEVN-TTPDSNL  
MQKLNEMRCEYEQIENNRKEVERWYETKMEEVNQEVHTSGQEQSSNHQVSELRRDYQT  
LEIELQSQLSMVQSLQSNLEDTERRYNILQIQIQNTITVEEELANIRCEIESQNEEYK  
LLDIKCHLEMEIATYRALLEEGQ  
>Alligator\_K9L3  
EKMTMQNLNDRLASYLEKVRHLEEENANLERLIREWYQNHGP----QCG-RDYSQY--Y  
GP-IEDLNQNIISATVDLNKVLIDIDNTRMTADDFRKYETEYSLRQVVEGDINGLRRPIL  
DQLTLARSDELAQYESLKEELISLKNHEEEMRGLQ-SQS---GGDVNVEVN-TTPDSNL  
MQKLNEMRCEYEQIENNRKEVERWYETKMEEVNQEVHTSGQEQSSNHQVSELRRDYQT  
LEIELQSQLSMVQSLQSNLEDTERRYNILQIQIQNTITVEEELANIRCEIESQNEEYK  
LLDIKCHLEMEIATYRALLEEGQ  
>Alligator\_K9L4  
EKMTMQNLNDRLASYLEKVRHLEEENANLEQLIREWYKQGP----QGG-RDYSQY--Y  
KT-IEDLNQNIISATVDLNKVLIDIDNTRMTADDFRKYETEYGLHQVVEGDINGLRRPIL  
DQLTLARSDELAQYESLKEELISLKNHEEEMKGLQ-SQS---SGDVSVEVN-AAPGTNL  
TEKLNEMRGEYERLIIENNRREVEWFEAKMEEVNQVHSSQEMESSNQVSELRRDYQT  
LEIELQSQLSMLQSLQSNLEDTERRYNMLQIQIQAMIIPVEEELANIRCEMESQNEEYK  
LLGIKTRLEMEIATYRALLEEGQ  
>Alligator\_K9L5  
EKMTMQNLNDRLASYLEKVRCLLEDNLQLERLIREWYQTHGP----QGG-KDYSHY--Y  
GP-IEDLLNQIVLATVANKIILDLNARMTADDFRKYETEYSLRQVVEGDINGLRRPIL  
DNLTAKSDEMQFESLREELIQLKKNHEEEMSLQ-SES---GGDVSVEVN-AAPGEDL  
MGLKNEMRKEYEYIQRNREVEWYETKMEEVNRHEVHTSGQEQSSNHQVSELRRDYQT  
LEIELQSQLSTLQSLQSNLEDTERRYNMLQIQIQNTITVEEELANIRCEMESQNEEYK  
LLGIKTRLEMEIATYRALLEEGQ  
>Alligator\_HAS1  
EKITMQNLNDRLASYLEKVRCLLEDNLQLERLIREWYQTHGP----CEP-KDYSCY--L  
RE-IEDLNQIVCATIENNKIVLIDNRSMAADDFRKYETEYSLRQVVEGDINGLRRPIL  
DQLTLARSDELAQYEAALKEELCCKKNHEEEMNCLR-KQS---TGDVSVEVN-TCPGPD  
KQVLEEMRQYEAIAQNRKVEDWYACKIEEVNREVISGQEQIECSNSQVCELRRQLQA  
LEIDLQAIQIRMRDNLQSSLAETCRYNMLQELQNIICVEQQLAELRAEIECQNEEYK  
LLDVKCRLEMEIATYRALLEEGQ  
>Alligator\_HAS2  
EKITMQNLNDRLASYLEKVRCLLEDNLQLERLIREWYQTHGP----CEP-KDYSCY--L

RE-IEDLQNIQVCAITVDNNKIILIDNRSRMTGDDFRMKYETELALCQSVEADINGLRQVL  
DQTLRCRSDLEAQLEALKEELCCLKNHEEEINCLR-NQS---TGDVNVNVEVN-SCPGPDL  
KQILDMDRCQYEAIIAQNRKVEVDWYACKIEEVNQEVISSSKEIECSNSQVSELRRLEQA  
LEIDLQSLRMRDNLQSSLAETERRYNQLAELQNIQIIVCEQQLAELRAEIECQNYQYK  
LLDVKCRLEQEIQTCCLL-EGG  
>Alligator\_K14L1  
EKETMQNLNDRLAAYLDKVRALAEANSELEIKIRDWYKQGP----GPD-RDYSPY--Y  
RT-IEDLRNKILAATVDNANLILQIDNARLAADDFRKFKFETEALRMSVEADINGLRRLV  
DELTLARADLEMQIENLKEELAYLKNHEEEMNALR-GQV---GGEITVEMD-AAPGVDL  
TKILTEMREQYEHLDKNRREAEQWFFKQTEELNQEVAINTEQLQSSKSEITELRRTIQG  
LEIELQSQLSKAALEGLTADTEARYGSQLAQIQGLITSVEQLAELRCMDMERQNHYYKI  
LLDVKCRLEQEIATYRRL-EGE  
>Alligator\_K14L2  
EKETMQNLNDRLAAYLDKVRALAEANSELEIKIRDWYKQGP----GPD-RDYSPY--Y  
RT-IEDLRNKILSATVDNANLILQIDNARLAADDFRKFKFETEALRMSVEADINGLRRLV  
DELTLAKADLEMQIENLSEELAYLKNHEEEMNALR-SQV---GGEITVEMD-AAPGVDL  
TKVLAEMREQYEHLDKNRREAEQWFFKQTEELNKEVAINTEQLQSSKSEIEMELRRTIQG  
LEIDLQSQLSMKAALEGLTADTEARYGSQLAQIQGLITSVEQLAELRCMDMERQNHYYKI  
LLDVKCRLEQEIATYRRL-EGE  
>Alligator\_K117  
EKDTMQNLNDRLAAYLERVCSLEANGQLEQRIQELQVKK-----TLA-RHYDPSSCF  
ST-IAELRSQIQDESVRNSQLTLQLDNAKLAANDFRMKYEAELATRLGVESDIKGLRQVL  
DGLTEARASLQVQIESLKEELTYLQNHGEEVAALQ-GHL---GGSVSEVD-ASPGINL  
VKTLAEIRIQYEDIIKKNRREAEAWHKQCCETFTQVEVATSSSEALQAARTKATELKRIVQS  
LEIEFQMLQSTKEALEGLTAEESHYGVEMAQLQNLVAGKAEALQRLTDTQRQANEYQH  
LLDLKTRLEVEIATYRRL-EGG  
>Alligator\_K18  
EKETMQNLNDRLASYLEKVRSLTANHNLEVQIREFLDKKGPST-----QDWHY--W  
DI-IEDLRNKIYESVDNARIIVLQIDNARLAADDFRKFKYEGELARQSVIADIAGLRQV  
DDTMNSRLQLESEIENLKEELIYMKNHEEAKSLQ-AQV---SGSGLTVEVD-SPKTHDL  
GKIMTDIRAQYEAALQKNRELDKYWNQIITESTIEITQSTKMDTAHGTLELRRTYQT  
LEIELESRLNKGSLANLMEVENRYGMQLEHLNGLLRTEAELMQVRTEVQRQAEYQ  
LLNKKVLEAEIATYRRL-EGE  
>Turtle\_K24  
EKGTMQNLNDRLAAYLDKVRALAEANADLEHKIRQWYKHPAAA---GLR-YDYSKY--Y  
QI-IEDLNQIISATIDNAKLVLQIDNAKLAADDFRKFKYENELPLHQSEIADINGLRRLV  
DDLTMTRSNLEAQLESLEELVYLNKHEGEMKSFQHGST---GEVNVNVEIN-ATPGVDL  
TKLLNEMRAQYELAEQNRREAEQWFFKQTEELNQEVAINTEQLQSSKSEITDLRRLIQG  
LEIELQSQLAKKSLAEGTLAEIEGNYGQSLQIQGLQISNLEQLKQIRSEMERCQNAEYQ  
LLGIKTRLEMEIATYRRL-EGE  
>Turtle\_K12  
EKETMQNLNDRLAAYLNKVSLEEGNTDLEHKIREWYKNGPGAGGPGAG-HDYSKY--Y  
PI-IEDLRNKIINASIDNARIIVLQIDNARLAADDFRKFKYENEAALRQSVIADINGLRRLV  
DELTLTRADLEMQIESLNEELAYLKNHEEELQGFQ-GNA---TGQVSEVEMD-AAPGIDL  
TKLLNMDRQYEVIAEQNRREAEAWFNEKSMELKREISTNTEQLQSSKSEITDLRRLIQG  
LEIELQSQLAMKSLAEDTLAETASYCAQLSIIQGLQIGNLESQLFQVRADMERQNAEYQ  
LLDIKTRLEMEIATYRRL-DGE  
>Turtle\_K20  
EKLTMQNLNDRLASYLEKVFLEKANSQLEKQIREWYANSSS-----TTR-HDHSKY--F  
KT-IEDLNQIIGAHLNARLILQIDNAKLAADDFRMKYENELAIKQNVENDLAGLRRLV  
DDLTLTRSDLAQIEGLNEELTFLLKNHEEVEGELR-KQL---GGTVNVEVD-AAPSIDL  
AKIMENRQYDMSMAEKNRQEAQDRFDKQTEEVNQEVAINIQLQTKKTEITDLRRTFQ  
LEIELQSQLSTKKALEDTLAEMEARYGSQLAQIAAIGNVEAQLMQLRADMQSQSTEYST  
LLDIKTRLEMEIATYRRL-EGE  
>Turtle\_K23  
EKQTMQNLNDRLAAYLEKVRSLAANAQLESCILEWHKRRSH-----EKK-HDFNQY--E  
QN-ITDMQIQIEDGKITNASIFLHIDNAKIASEDLSLKYVEQSLRQGMQISVENLRKEL  
DNLTIVTDLMEIEGIEEQELRKKDHEKMGHEH-SQ---DFKVNQVQV-AVPKEDL  
AKILAGIRKDYEAIIKKNHGLVWYKQATVSPATNISPEEIQSNESEIKNLRRTFQA  
LEIELQAQFSKYYALKGTAEQAHYTFQLQNIQSSISNCEELSQLRQDIKQNNHYKI  
LLGIKTRLEKIEISTYRQL-EGT  
>Turtle\_K15  
EKVTMQNLNDRLASYLKVRALAEQANTDLEIKIRDWYKQGP----SPD-RDYSPY--Y  
KI-IEDLRNKILAATIDNRSRVIILIDNARLAADDFRKFKYENELPLRQSVIADINGLRRLV  
DELTLARADLEMQIENLKEELAFLLKNHEEEMKALG-GQT---GGQVSEVEMD-AAPGVDL  
TSILSEMREQYELADKNRREAEAWFQTEELNREVAATSTEIHTSKSEITELRRTIQG  
LEIELQSQLSMKAALEGLTADTENRYGAQLAQIHLIGNVEAQLTDLRADMERQNSDYKQ  
LLDIKTRLEQEIATYRRL-EGG  
>Turtle\_K19  
EKSTMQNLNDRLASYLKVRALAEANSELEIKIRDWYKQGP----GPA-HDYSKY--Y  
KT-IEDLRNKILAATIDNRSRVIILIDNARLAADDFRKFKYETEALRMSVEADINGLRRLV  
DELTLARADLEMQIESLKEELAYLKNHEEEMKALG-GQT---GGQVSEVEMD-AAPGVDL  
TKILADMRQYEVMAEKNRKDAETWFNSKTEELNQEVAINTEQLQTSKTEITDLRRTIQG  
LEIELQSQLSMKAALEGLTADTENRYGAQLAQIHLIGNVEAQLTDLRADMERQNSDYKQ  
LMDIKTRLEQEIATYRQL-EGG  
>Turtle\_K9L  
EKITMQNLNDRLASYLKVRALAEANLENLEIKWYLRKGP----ATL-KDYSRY--Y  
EE-IEQLNQIIVNSSVEVNVKILINIDNTRMTIEDFKLYETELGLRQNVGDIINGLRPL  
DQTLTRSDLEAQLECLKEELCCLKNHEEELKGLQ-PQT---SGDVNVEVN-ATPGYDL  
TEILNDRREYEHIEENRKEVEKWEYETKISEVNVHSSGRDIESSTKQVTELRREYQ  
VEIELQSLSTIQSLQSSADTEGRYNIQLNIQTIIVSVEELASIRCBIDNQNYEYRL  
LLGIKQLEQEIATYRRL-EGG  
>Turtle\_HAS1  
EKLTMQNLNDRLASYLKVRCLAEANALECKIKWYAHGHGHT---GVP-KDYSCY--Y  
KE-IEDLQNIQVCAITLDNNKIILNIDNRSMAADDFRKFKFETELALRQSVIADINGLRRLV  
DELTLARADLEMQIESLKEELAYLKNHEEEMKALG-GQT---GGQVSEVEMD-AAPGVDL  
KKILEEMRCQYETMIAQNRKVEVDWYECKIEEVNREVISSQVEVESCNSQVAELRRQLQC  
LEIDLQSHLSQRDNLEASLAETESRYNSHLCLQQLQITVCEQQLADLRTIEESQNHYYKI  
LLDVKCRLEQEIHTYRRL-EGG  
>Turtle\_HAS2  
-----XXX-KDYSCY--Y  
KE-IEDLQNIQVCAITLDNNKIILNIDNRSMAADDFRKFKFETELALRQSVIADINGLRQVL  
DELTLARADLEMQIESLKEELCCLKNHEEELKGLQ-PQT---SGDVNVEVN-ATPGYDL  
KKILEEMRCQYETMIAQNRKVEVDWYECKIEEVNREVISSQVEVESCNSQVAELRRQLQC  
LEIDLQSHLSQRDNLEASLAETESRYNSHLCLQQLQITVCEQQLADLRAEIESQNHYYKI  
LLDVKCRLEQEIHTYRRL-EGG  
>Turtle\_K14L1  
EKETMQNLNDRLATYLDKVRALAEANSLEIKIKWYKQGP----SPD-RDYSPY--Y  
RT-IEDLRNKILAATIDNANIVLQIDNARLAADDFRKFKFETELALRMSVEADINGLRRLV  
DELTLARADLEMQIENLKEELAYLKNHEEEMNILR-SQL---GGEITVEMD-AAPGVDL  
TKILADMRQYESLAEKNRREAEQWFFKQTEELNREVAAMNTEQLQSSKSEITELRRTVQ  
LEIELQSQLSMKAALEGLTAEESRYGAQLAQIHLIGNVEAQLAELRCMDMERQNHYYKI  
LVDVTRLEQEIATYRRL-EGE  
>Turtle\_K14L2

EKETMQNLNDRLANYLKVRLEEANSLEIKIKEWYKQGP----GPD-RDYSY--Y  
RT-IEDLRKILAAATVDNASLLQIDNARLTADDFRKFETEALRMSVEADINGLRRVL  
DELTLARADLEMQIENLKEELAYLKKNHHEEMNILR-SQL---GGDITVEMD-AAPGVDL  
TKILADMREQYESLAEKNRKEAEQWFFQTEQLNREVAMNTEQLQSGKSEITELRRTVQG  
LEIELQSLSMKAALQEGSLAETARYGSLAQQLQGLITSVBEQLAELRCDMERQNHYYKI  
LVDVKTREBIEIATYRRL-EGE  
>Turtle\_K17  
EKDTMQNLNDRLAAYLETVRSLEEANGQLERQIREVYAKRAQ----AGC-QDLGSGY--F  
ST-IAELRSQIQAASTSNALQILQIDNARLAADDFRKFPESELAIRRGESDVGALRKKVL  
DEVTLRSASLQEEELGSLQEEALQKKNHGEAAALQ-GRL---GGSVSEVD-SAPGVDL  
VKTLAEIRDOYEDVIERNHREAAAWHKEQCETVAQEVATSAEAVQGARTKLELRRTVQG  
LEVELQSLYSMKEALEGTLAETRAGSGALEQLRECVARKEAELAQRLTDTQRQAEBHQ  
LLDLKTRLEMBIEIATYRRL-EGD  
>Turtle\_K18  
EKETMQNLNDRLASYLKVRLETDNQKLETQIREFMDKKG-----PSS-RDWSHY--F  
DI-IEDLRKQILDSAVDNARIVLQIDNARLAADDFRKFPESELAIRQSVESDINGLRRVL  
DDTMNSRLQLEGEIESLKEELIFMKNKHQDEVDLQ-AQI---TNSGLTVEVD-AAQPDQL  
GKVMAEIRAQYDNLAQKNMADLQDQWQNMITQSTVEITQNTKEIEVARSSVSELRTYQT  
LEIELESRLNKASLEANLQDVEQRYAMQHEHLNQLLRABAEALQIRNDIQRQSEYQA  
LLNKKLEAEIATYRRL-EGG  
>Lizard\_K24  
EKETMQNLNDRLANYLEKVRSEANAELEVKIRHWYKNGPGAP--GVV-RDYTKY--H  
QI-IEDLRNKIVNTTIDNANVVLQIDNARLAADDFRKFENELFLRQSVESDINGLRRVL  
DELTMNSRDLQLEENLTELAYLKKNHHEEINMLK-SNS---TGDVTVEMN-AAPGIDL  
TKLLNMDRAQYEDLAEQNRRAEQPHKMSQPLQQQIYDDAGAVSSARNELIELKRSFQS  
LEIELQSLAKKASLEGTLETEANYSSQLHLQLQVSNLEELQQLQIRSETECONSEYQQ  
LLGIKTRLEMBIEIATYRRL-DGE  
>Lizard\_K24L  
EKHTMQNLNDRLANYLKGVHLEAEANAELEKIKDWYAKCSIP----DTS-RDYTKY--F  
NI-IEDLRGKILRQTIENAGIVLQIDNARLAADDFRKFENELFLHQNVENDINGLRRVL  
DDLTMHRSDELQIEGLNEELAYLKKNHHEELKSPR-GAS---SGDVSVEVD-AAPGVDL  
TKLLNSMRQYELAEKNRQEAEDQFNKQVGLRQELISANVDQLSTGKTEITDLRRTLQG  
LELELQQLAMKQSLQLEGTLEAETERNYCDLQALQISQIAGLEQLLQLRADMENQNSDYQH  
LLGIKTRLEMBIEIATYRRL-DGE  
>Lizard\_K10L  
EKETMQNLNDRLASYLAKVHLEKANSELEKIKNWYKNAFQA---DGGFRDYSKY--Y  
AS-IDELRNKIVSASVNSNIILQIDNARLAADDFRKFENEVFRQSI EADINGLHKVF  
DEVTLKSNLQIEGLNEELAYLKKNHHEEIRGLR-GPT---SGNVSEVMN-AVPGDPL  
TILLNKMREEYEALAEQNRQDAETWFKSNELNTTISMSAKETSTNKKEIAELRRTLQG  
LEIDLKTLALRQSLQLEGTLEAETEDGYCQLLQMLQGLINNTAEQVKQVRDDMESQADYRQ  
LLDIKIHLEMBIEIATYRRL-DSE  
>Lizard\_K12  
EKETMQNLNDRLAAYLDRVHSLAEANTELEKIREWYKNGPGTALGAG-RDYSKY--Y  
PV-IEDLRNKIINATINENARIVLQIDNARLAADDFRKFENEVALRQSVESDINGLRRVL  
DELTLTRADLEMQIETLNEELAYLKKNHHEEELIGFQ-SNA---TGQVSEVD-AAPGVDL  
TKLLNEMRAQYESIAEQHRKEAEAWFNEKSGELKREISTHSEQLQYKSELTDLKRRTLQS  
LEIELQSLAKKASLEGTLEAETAGYCTQLAQMLQGLIGNVSEQLFQVRADMERQNAEYQN  
LMDIKTRLEMBIEIATYRRL-DGE  
>Lizard\_K23  
EKQTMQNLNDRLAAYLKVHSLAEANTQLEGCIREWHERRSQ----GMK-HDFTDY--E  
QN-IVDMHERIEAGRVNAGIVLQIDNARLAADDFRKFENEVALRQSVQDDVENIRKEL  
DNMTIITIDLEMEIEALREDHILKKEHEKDEMEAS--GAF--KDVNVNKKV--TAPQEDL  
AKILAGIRADYEAIIQKNHQSLEDAWFQKQIANDSBEKPNQEEQSSNQKEISELNRTLQS  
LEIDLQTLHLNKKSLNLEDTTRAYAFQLQSIQNLISQCEELSEFRHDIKCQNNQYKQ  
LLGIKTRLEMBIEIATYRRL-DGK  
>Lizard\_K36L1  
EKETMEFLNDRGNLRLERVRCLEQENAELEKIREWYEHENA----YVC-TDFKPF--Y  
CT-IDELQOQICCTKADNAKCLDIDNARLAADDFRKFENEVALRQSVESDINGLRRVL  
DNLTLCRADLEAQLESILTEEMMLCKNHHEEESALR-SQL---GDRINVEVD-AAPSCNL  
NKVLEDMRCQYEADELEKRRVEDWYCAQMEELNKEVISSGEQLCCQTEIETRCVQT  
LEIELQOQSMKSALETLQTESTRYCTQLAQQLCLISNVEAQLTEIRSDIERQNCQDYKA  
LLDEKARLDCEIAAYRNML-EGE  
>Lizard\_K36L2  
EKELMQNLNDRLANYLRLERVRCLEQDNANLECKIREWHECQAP----YES-TDFHSH--Y  
KI-IEELQHQILCAKTENARVLEIDNARLAADDFRKFETEALRQCVESDINGLRRVL  
DEMTLCRADLEAQLESHEEELCLKNHHEEENALR-SKL---GARVNVEVD-AAPSCDL  
NKMLGEBIRNQECLAENRRDVEWTFSSKMEELNQQVLSSEELQNCQSEIETLRHTMQA  
LEIDLDAQNMKNALLECTLHETARYSTQLAQQLCMISTIEGQLGLRNDMERQSHYYKI  
LVDVKTREAEIATYRRL-EGE  
>Lizard\_K15  
EKVTMQNLNDRLATYLDKVRLEEANTELEVKIRDWHQKQAPK----SPS-RDYSQY--Y  
KI-IEDLRKILGTTIDNSRVILEIDNARLAADDFRKFENELHLRQSVESDINGLRRVL  
DELTMKSDELQIEGLKEDLAYLKNHHEELMKEF-SQL---TGKVSVEVD-AAPGIDL  
TKILADMREQYEHLEQNRKDAETWFFSKTEELNREAVNTTEQIQTSSKSEISELRTIQG  
LEIELQSLSMKAALQEGSLAETARYGSLAQQLQGLITSVBEQLAELRCDMERQNHYYKI  
LVDVKTREAEIATYRRL-EGG  
>Lizard\_K19  
EKITMQNLNDRLASYLKVRLEEANSLEIKIKEWYKQGP----SPA-RDYSY--Y  
KT-IEDLRKILDATIDNKNIVLQIDNARLAADDFRKFETEALRMSVEADINGLRRVL  
DELTLARSDELQIETLKEELAYLKKNHHEEELGALS-GHL---GGQVSVEVD-SAPGIDL  
TKILAEEMRDQYELLADKNRDAEAWFTTKELESRVAVNTEQLQSSKTEITDLRRTLQG  
LEIELQSLSMKAALQEGSLAETARYGSLAQQLQGLITSVBEQLAELRCDMERQNHYYKI  
LVDVKTREAEIATYRRL-EGG  
>Lizard\_K9L1  
EKSTMQNLNDRLAAYMNVKYLEENAELEKIREWYKQKGDV---GTV-RDYTH--Y  
QE-IDQLFNELVNETDDYNKILLNIDNTRMTAEDFQIKYQTEAGLRQNVESDINGLRRVL  
DQTLARSDELQIEGLKEDLAYLKNHHEELRELEQ-SQR---GHGDINVEVD-AAPGPDV  
KQRLDQLRAEYEAIDNRRREVEQWFEKMEVVRQVSSSGLEISSGNQOVTDLRRTYQT  
LEIELQSLSMIQLQSNLEDTERRYNLQQLQISMIQVVEGELASLRGEBESQSQYBQS  
LLGIKTRLEMBIEIATYRRL-EGG  
>Lizard\_K9L2  
EKSTMQNLNDRFASYLNVKSLAEANNQLETLIREWYKQKGT---SEP-KDYSSY--Y  
TE-IDQLVNEILSASLESNILLVDNARMAAEDFKLYETEGLRQNVESDINGLRRVL  
DKLTMKSDLEMQYESLHEELVHLKNHHEEELVMSQH-HQS---GGDINVEVD-AAPGQDL  
TKTLNDRQYEEIIMKNRKEVQWFEAKMEARQOQSPESQEGGSRGHQIETLREYQT  
LEIELQSLSTIQALQNNLNTEGGYNMQLQLASQIEPVEAEALAGIKGEIQNTQYBQT  
LLGIKTRLEMBIEIATYRRL-EGG  
>Lizard\_HAS1  
KKMTMQNLNDRLASYLNVRYLEENAELEKIRDWYDQKQSP---NDP-KDYNYY--Y  
EQ-TEDLKQKILCATVDCRKLILIDHNKLTADDFRMYEAERVFRQKTEIDSLRQVL  
DQTLGRSDELQIEGLKEDLAYLKNHHEEELVMSQH-HQS---GGDINVEVD-AAPGQDL  
QKALDNLRRRYEAIEKNRKEVQWFEAKMEARQOQSPESQEGGSRGHQIETLREYQT  
LEIELQSLSTIQALQNNLNTEGGYNMQLQLASQIEPVEAEALAGIKGEIQNTQYBQT  
LLGIKTRLEMBIEIATYRRL-EGG

>Lizard\_HAS2  
EKMTQNLNDRLASYLKVRCLLEENGQLECKIKIEWYDRQGPV----NES-KDYAAY--Y  
QQ-IEDLNQIVCATVENSKLVLIDNRMRTADDFRMYETELALCQNVREADINGLRQVL  
DQLTLCRSDEAQLESRLREELCCKKNHEEESKHLK-KQS---SGDVSVEVN-TCPPGDL  
KKVLDLRLCQYENMIENNRREVEKWEYKMEVNVLEVCNSKAEEDCQNIQVLDLKRQLQT  
LEIDLQAQLSLRDLQDSLAETECRYNGHLAEIQNQISCVQEQLGELRAEMECQNYRE  
LLDVKCRLEQEIQTYSRCLL-EGG  
>Lizard\_HAS3  
EKVLMQNLNDRLGNYIDKVRCLLEKANALESQISDFCLKHGLT----GEM-KDHSHF--Y  
QQ-IEELKQVFNANLNNKLLKIDNHNMDLEDLDRKYYETEYVIRENVEADVNGLRPVL  
KELTGKADLKAELNSLKEEICDLKKTHEKDLNCRK-KRS--HGSNKEVSIK--PGTDL  
KQMLKEMRQYEAKEIENSRKVEVQRYEDKLEKEMNLVNNSSQIEDGNHKLVDLCKLPA  
LEIDLQAQYNNMRDTLKVCLEIECHFQTLGEMQEIQISNMEHQLAELHLEMETQDQYKKG  
LVDVKKRLEQEIQTYSSLLKEGQ  
>Lizard\_HAS4  
GKMTQNLNDRLASYLKVRCLLEENADLESRIREFYAKQGPL----SEP-KDYSHY--H  
QQ-IEDLNQILICTSVENKLLLCIDNSKLTADDFRKFTEECCLRNVEADINGLHQIL  
DQLTACRDLVDQCDNLQDELNCKKNHAEVACLK-KQS---TGDVNVN-TCPPGDL  
KKILEEMRQYETMIEGNRKEVEAWYKIEEENRVDVCSNQQIEESNNKVTLELRRLQA  
LQIDYEAQCSLRDLTLEASLGETELRYNGHLGDLQERISCLQEQLAELRSEMCEQNHYTE  
LLDVKSRLEQEIQTYRGLL-EGG  
>Lizard\_K14L1  
EKETMQNLNDRLASYLKVRLEEAANTDLEVKIKIEWYKQGP-----SPE-RDYSPY--F  
RT-IEELRSKILAAATVDNASIVLQIDNARLAADDFRNFTEHALRVNVEADINGLRVVL  
DELTLARADLEMQIENFKLELVYLRKNHEEEMIFR-SQS---GGEISVEMD-AAPGVLD  
TKILSEMREQYELAEKKNRDAEQWFFSKTEELTREVAINTEQLQSGKTEITELRRTYQN  
LEIELNAQLSMKAALESADTEARYGAQLSQIQVLTINVEQLADLRCEMERQNHYYKM  
LLDVKTRLEQEIATYRRL-EGE  
>Lizard\_K14L2  
EKETMQNLNDRLATYLDKVRLEHANTELEVKIREWYKQGP-----GPQ-RDYSSY--F  
RT-IEDLRKILAAASVQNAITLLQDNLAKLTADDFRKYETEHALRSTVEADIHGLRKMV  
DELTLTRSDLEMQLENLKEELAYLKNHEEELKVL-RSQM---GGEITVEMD-AAPGVLD  
TKILAEEMRQYELAEKKNRDAEQWFFSKTEELNQEVAINTEQLQSGKSEVIELRRTLQ  
LEIELQTLQSMKSLLEGTLEAETESRYGLNQLQALITSVELAEELRCDMERQNSYK  
LLDVKTRLEQEIATYRRL-EGE  
>Lizard\_K117  
QKGTMQNLNDRLAAYLGRVHSEESNAQLEQNIREYAKRAS-----AGG-PDLSGY--F  
NT-LEELKAKIEQETLNNAGLLRINDNARLAADDFKVKLESEVAIRLSLEGVNGLRKVL  
DDVNASRASLQVQVDNLQEEVLVYLRKNHEEVAASLQ-GRL---GGTVNVEVD-SMPGVLD  
QKVLAEIRDQYEDVMEKNRQEAALHKAQCDAINQVADSSALQAAQLKITELRRLQA  
LEIELQSLRSTKIALEGTLVETESRYGMELSRLELISARESELFLQRSEAQRQAEYDKR  
LMDIKKLEQEIATYRRL-EGE  
>Lizard\_K18  
EKETMQNLNDRLASYLEKVRSLAEADNRKLEIQIREHLDKKGPSA-----RDWSHY--F  
EL-IEDLRNQIFDQTIIDNSRIVLQIDNARLAADDFRKFVFEALAIRQSVENDINGLRV  
DDTMNRLQLESEIEALKKEELVFMKNHQDEVNLLQ-AQI---ANGLTVEVD-APKTQDL  
GKIMAEIRAQYDVLAKNLEDLKYWSQQITESTVVIETESKDIKARANITDLRRSVQT  
HEIELESARNLRASLEANLHEVEMRYGLQMEHLNGIILRTEADLAQLRNDVQRQAEYQ  
LLNKKLEQEIATYRRL-EGE  
>Snake\_K24  
EKETMQNLNDRLANYLEKVRSLAEANAELERIRHWYKPNAGPAP-----GVT-RDYSKY--H  
RI-IEDLRNQILSMTVENANVVLQIDNARLAADDFRKYENELFLHQSVENDINGLRV  
DDLTMNRSDEAQLESFTEELAYLKNHEEEMTLR-SSS---TGDVTVEMN-AAPGIDL  
TKLLNDRMQYEDLAEQNRRAEQFIRMSQPLQQIHDGAGAASSARNELIELKRSLS  
LEIELQSLAKKASLEGTLEAETESRYGLNQLQALITSVELAEELRCDMERQNSYK  
LLGKTRLEQEIATYRRL-EGE  
>Snake\_K24L  
EKQTMQNLNDRLANYLEKVRSLAEANAELERIKIEWYKFSAT----DTD-RDYSKY--F  
KI-IEDLRNQICRYTIENAGIVLQVDNARLAADDFRKYENELFLHQSVENDINGLRV  
DDLALNKADLEQVESLTELVEYLKKNHEEELMSFR-GVA---SGDVTVEVD-AAPGVLD  
TKLLNDRMQYEDLAEQNRRAEQFIRMSQPLQQIHDGAGAASSARNELIELKRSLS  
LEIELQAMKQSLLEGTLEAETERNYCDLQGLQIQVQISSFEQLLQIRSDMENQNAEYQ  
LLGKTRLEQEIATYRRL-EGE  
>Snake\_K10L1  
EKETMQNLNDRLASYLAKVHALEEANGDLEQKIRNWKQKATHIN--EGL-YNDSKY--N  
SS-IEDLRNKIITASIRNAGTILQIDNARLAADDFRKYENELFLHQSVENDINGLRV  
DELSSMSDLQIQLSLEELTFKKNHEEEMKNWQ-GTV---AGDINVEIN-AAPGVLD  
TAVLNKMRTEYEALEQNRKDAETWFIKSKELNTTINVSAKETTTNKQIADLRHILQS  
LEIDMKTQLSLRQSLERTLAETEGYCAQLLQIQGKISSVENQVQVQIRSDMEQNAEYR  
LLDIKIRLENEIATYRRL-EGE  
>Snake\_K10L2  
-XXXMQNLNDRLATYLVNQVALEEAENSELEKIAEWYEMFGAGNQA-QQ-QDYSEY--Y  
AI-IDDLRNQI IATSIDNGTLILQIDNARLAGADFKLYDNEVAIHQSVEMDANGLRKL  
EIEITSSDLKQVINSFTEELQMKKNHEEEMSMN-DST--AAGDINVEIN-VTPGVLD  
TTLLNQMRGEYEALEQNRREDMEAWFHEQSQELNQRINTSVEETSTNKSEITEMKRALQ  
LEIELQSLKQSLKQSLAETLAETEGYCAQLLQIQEVIQSVGEVQVQVQIRSDMEQNAEYR  
LLDVKIRLENEIDTYRSL-EGS  
>Snake\_K20  
-XXXMQNLNDRLAAYLEKVRSLAESNSVFEKQIREWYKSSP-----ITK-QDYSAY--F  
KV-IRELQDKITEAREDNTRIILQIDNSKLAADDFRKYETELGLRLSVEYDITGLQGLI  
DDLTLVTRDLEQEQIESLKEELAYLRKHDEETARLR-GQL---SGNVSVEMD-AAPGIDL  
AQMMENRQYELAEKKNRDAEQWFFSKTEELNREVAHTHEQLQTSKTEISELRTIQS  
LEIELRSQSLSWKTERENALAEIAHYRTILTQIQMAIGNIEAQLMQLRSDMEQNSMEYSI  
LLDIKVKLEAIEIATYRRL-EGE  
>Snake\_K23  
EKRTMQNLNDRLASYLEKVRSLAEANTQLEGCIREWYKQKRSR-----GTQ-RDFKDY--E  
QN-ISDMHRIETGRVTNAGLVLQIDNARLAADDFRKYETELGLRLSVEYDITGLQGLI  
DNMTIITDLEMEIEALREDHILKKEHEANMQAHG-SSK---DFKVNKVD-KTPQEDL  
SKILAGIRADYEAIEKKNRQSLDSWFQQIQGESSAGQHNQEEELQNSQKIESELNRTLQ  
LEIDFQTELNKFALENNFGETKGRYAFQLQSIQNLKKEEELSKFRHDIKCQNNQYK  
LFGKTRLEIEIATYRQLL-DGD  
>Snake\_K15  
EKITMQNLNDRLANYLEKVRLEEAANTELEIKIRDWHQKQAPT----SQA-KDYSNY--Y  
KI-ISDLRNKIGDCTCDNSKVVLEIDNARLAADDFRKYENELHLRQGVESDINGLRV  
DELTLRFSQDMEMQIEEKEDLAYLKNHEEELMKEYS-TQL---TGQVNVEMD-AAPGVLD  
TKILADMRQYEQMAEENRRDAEQWFFSKTEELNREVAHTHEQLQTSKTEISELRTIQS  
LEIELQSHLSMKAGLESNLDTEGRYCAQLAQIQNLITGVEQLAELRNDMERQNYEYR  
LMDIKTRLEQEIATYRRL-EGQ  
>Snake\_K19  
EKVTMQNLNDRLANYLEKVRLEEAANTELEVKIREWYKQGP-----TAS-RDFSLY--F  
KT-IEDLRKIKDATIGNNSIILQIDNARLAADDFRKFTEQALRISVETDINGLRV  
DELTLRSDLEMQIENLKEELAYLKNHEEEMSTLS-GQL---GGQVSVEMD-SAPGIDL  
TKILADMRQYELAEKKNRDAEQWFFSKTEELNREVAHTHEQLQTSKTEITDLRRLTQ  
LEIELQSLKSMKSALEGTLEAETARYGNRLCQIQGLISNIEAQLVEVRSMDMERQNNYK



LMDIKTRLEQBIETRYQLL-DGQ  
>Snake\_K9L  
EKATMQNLNDRLANYLQVCRLEEDENCQLEIWKIWEYQKHGDI----GPD-KDYSCY--Y  
QE-IDQLYNELFAETDDYINKIILNIDNTRMTAEDFKLYNTEAGLCKNVEADINGLRPLL  
DQLTLAKSDELMQFESLREELICLKNHEETLRLGLR-GQR--GHGDVSVSEVN-AAPGDDL  
KQRDLQRCYENIIEQNRKEVWYETKMEVVRQVSTSDQEIITSSNHQSELRRREYQT  
LEIELQSQISMIQSLQTNLEDTERRYNMQLQIQAMIEPVEGELASIRCEIESQNYEQYQ  
LLGIKTRLEQBIETRYRRL-EGG  
>Snake\_HAS1  
EKMTMQNLNDRLACYLEKVRNLEENADLEAIRQWYDRQGGP----SEL-KDYSSY--Y  
QQ-IEELKNQIVCATVDNSKLLLDIDNRMRTADDFRKYETELALCQVNEADINGLRQVL  
DQLTLARADLEMQIESLKEELAYLKNHEEEMNLR-GQT--GGDVSVSEVN-SPGDDL  
KVLLEMRQCYETMIENNRKEVEQWYERKMEVNVQVVCISSEKVEDCNOQVVDLKRQQLT  
LEIDLQAQLCLRESLQDSLGETECRYNTHLAEIQNQISLVEQQLAELRAEMECQNYREYR  
LLDVKTRLEQBIETRYRRL-EGG  
>Snake\_HAS2  
GKMTMQNLNDRLASYLKVRNLEENAELECRIFRYAQGGP----SEP-KDYSHY--H  
QQ-IEDLKNQILCASVENKLLLDIDNSKLTADDFRKYETELALCQVNEADINGLRQVL  
DQLTLARADLEMQIESLKEELAYLKNHEEEMNLR-GQT--GGDVSVSEVN-SPGDDL  
KVLLEMRQCYETMIENNRKEVEQWYERKMEVNVQVVCISSEKVEDCNOQVVDLKRQQLT  
LEIDLQAQLCLRESLQDSLGETECRYNTHLAEIQNQISLVEQQLAELRAEMECQNYREYR  
LLDVKTRLEQBIETRYRRL-EGG  
>Snake\_K14L1  
EKQTMQNLNDRLANYLKVRLEEAANTSLEIKINEWYQKQGP----APD-RDYSSY--F  
RK-IEDLKNQILCASVENKLLLDIDNSKLTADDFRKYETELALCQVNEADINGLRQVL  
DQLTLARADLEMQIESLKEELAYLKNHEEEMNLR-GQT--GGDVSVSEVN-SPGDDL  
KVLLEMRQCYETMIENNRKEVEQWYERKMEVNVQVVCISSEKVEDCNOQVVDLKRQQLT  
LEIDLQAQLCLRESLQDSLGETECRYNTHLAEIQNQISLVEQQLAELRAEMECQNYREYR  
LLDVKTRLEQBIETRYRRL-EGG  
>Snake\_K14L2  
EKETMQNLNDRLAAYLQVCRLEESNASLEVRKIEWYQKQAP----GPD-RDYSSY--F  
RI-IEDLRKIVSATVENADVLLQIDNARLAADDFRKYETELALCQVNEADINGLRQVL  
DQLTLARADLEMQIESLKEELAYLKNHEEEMNLR-GQT--GGDVSVSEVN-SPGDDL  
KVLLEMRQCYETMIENNRKEVEQWYERKMEVNVQVVCISSEKVEDCNOQVVDLKRQQLT  
LEIDLQAQLCLRESLQDSLGETECRYNTHLAEIQNQISLVEQQLAELRAEMECQNYREYR  
LLDVKTRLEQBIETRYRRL-EGG  
>Snake\_K117  
EKGTMQNLNDRLAAYLQVCRLEESNASLEVRKIEWYQKQAP----GPD-RDYSSY--F  
RI-IEDLRKIVSATVENADVLLQIDNARLAADDFRKYETELALCQVNEADINGLRQVL  
DQLTLARADLEMQIESLKEELAYLKNHEEEMNLR-GQT--GGDVSVSEVN-SPGDDL  
KVLLEMRQCYETMIENNRKEVEQWYERKMEVNVQVVCISSEKVEDCNOQVVDLKRQQLT  
LEIDLQAQLCLRESLQDSLGETECRYNTHLAEIQNQISLVEQQLAELRAEMECQNYREYR  
LLDVKTRLEQBIETRYRRL-EGG  
>Snake\_K18  
EKETMQNLNDRLANYLKVRLEEAANTSLEIKINEWYQKQGP----APD-RDYSSY--F  
RK-IEDLKNQILCASVENKLLLDIDNSKLTADDFRKYETELALCQVNEADINGLRQVL  
DQLTLARADLEMQIESLKEELAYLKNHEEEMNLR-GQT--GGDVSVSEVN-SPGDDL  
KVLLEMRQCYETMIENNRKEVEQWYERKMEVNVQVVCISSEKVEDCNOQVVDLKRQQLT  
LEIDLQAQLCLRESLQDSLGETECRYNTHLAEIQNQISLVEQQLAELRAEMECQNYREYR  
LLDVKTRLEQBIETRYRRL-EGG  
>Human\_K9  
EKSTMQNLNDRLASYLKVRLEEAANTSLEIKINEWYQKQAP----GPD-RDYSSY--F  
RI-IEDLRKIVSATVENADVLLQIDNARLAADDFRKYETELALCQVNEADINGLRQVL  
DQLTLARADLEMQIESLKEELAYLKNHEEEMNLR-GQT--GGDVSVSEVN-SPGDDL  
KVLLEMRQCYETMIENNRKEVEQWYERKMEVNVQVVCISSEKVEDCNOQVVDLKRQQLT  
LEIDLQAQLCLRESLQDSLGETECRYNTHLAEIQNQISLVEQQLAELRAEMECQNYREYR  
LLDVKTRLEQBIETRYRRL-EGG  
>Human\_K10  
EKVTMQNLNDRLANYLKVRLEEAANTSLEIKINEWYQKQGP----APD-RDYSSY--F  
RK-IEDLKNQILCASVENKLLLDIDNSKLTADDFRKYETELALCQVNEADINGLRQVL  
DQLTLARADLEMQIESLKEELAYLKNHEEEMNLR-GQT--GGDVSVSEVN-SPGDDL  
KVLLEMRQCYETMIENNRKEVEQWYERKMEVNVQVVCISSEKVEDCNOQVVDLKRQQLT  
LEIDLQAQLCLRESLQDSLGETECRYNTHLAEIQNQISLVEQQLAELRAEMECQNYREYR  
LLDVKTRLEQBIETRYRRL-EGG  
>Human\_K11  
EKITMQNLNDRLASYLEKVRLEEAANTSLEIKINEWYQKQGP----APD-RDYSSY--F  
RK-IEDLKNQILCASVENKLLLDIDNSKLTADDFRKYETELALCQVNEADINGLRQVL  
DQLTLARADLEMQIESLKEELAYLKNHEEEMNLR-GQT--GGDVSVSEVN-SPGDDL  
KVLLEMRQCYETMIENNRKEVEQWYERKMEVNVQVVCISSEKVEDCNOQVVDLKRQQLT  
LEIDLQAQLCLRESLQDSLGETECRYNTHLAEIQNQISLVEQQLAELRAEMECQNYREYR  
LLDVKTRLEQBIETRYRRL-EGG  
>Human\_K12  
EKETMQNLNDRLANYLKVRLEEAANTSLEIKINEWYQKQGP----APD-RDYSSY--F  
RK-IEDLKNQILCASVENKLLLDIDNSKLTADDFRKYETELALCQVNEADINGLRQVL  
DQLTLARADLEMQIESLKEELAYLKNHEEEMNLR-GQT--GGDVSVSEVN-SPGDDL  
KVLLEMRQCYETMIENNRKEVEQWYERKMEVNVQVVCISSEKVEDCNOQVVDLKRQQLT  
LEIDLQAQLCLRESLQDSLGETECRYNTHLAEIQNQISLVEQQLAELRAEMECQNYREYR  
LLDVKTRLEQBIETRYRRL-EGG  
>Human\_K13  
EKITMQNLNDRLASYLEKVRLEEAANTSLEIKINEWYQKQGP----APD-RDYSSY--F  
RK-IEDLKNQILCASVENKLLLDIDNSKLTADDFRKYETELALCQVNEADINGLRQVL  
DQLTLARADLEMQIESLKEELAYLKNHEEEMNLR-GQT--GGDVSVSEVN-SPGDDL  
KVLLEMRQCYETMIENNRKEVEQWYERKMEVNVQVVCISSEKVEDCNOQVVDLKRQQLT  
LEIDLQAQLCLRESLQDSLGETECRYNTHLAEIQNQISLVEQQLAELRAEMECQNYREYR  
LLDVKTRLEQBIETRYRRL-EGG  
>Human\_K14  
EKVTMQNLNDRLANYLKVRLEEAANTSLEIKINEWYQKQGP----APD-RDYSSY--F  
RK-IEDLKNQILCASVENKLLLDIDNSKLTADDFRKYETELALCQVNEADINGLRQVL  
DQLTLARADLEMQIESLKEELAYLKNHEEEMNLR-GQT--GGDVSVSEVN-SPGDDL  
KVLLEMRQCYETMIENNRKEVEQWYERKMEVNVQVVCISSEKVEDCNOQVVDLKRQQLT  
LEIDLQAQLCLRESLQDSLGETECRYNTHLAEIQNQISLVEQQLAELRAEMECQNYREYR  
LLDVKTRLEQBIETRYRRL-EGG  
>Human\_K15  
EKITMQNLNDRLASYLEKVRLEEAANTSLEIKINEWYQKQGP----APD-RDYSSY--F  
RK-IEDLKNQILCASVENKLLLDIDNSKLTADDFRKYETELALCQVNEADINGLRQVL  
DQLTLARADLEMQIESLKEELAYLKNHEEEMNLR-GQT--GGDVSVSEVN-SPGDDL  
KVLLEMRQCYETMIENNRKEVEQWYERKMEVNVQVVCISSEKVEDCNOQVVDLKRQQLT  
LEIDLQAQLCLRESLQDSLGETECRYNTHLAEIQNQISLVEQQLAELRAEMECQNYREYR  
LLDVKTRLEQBIETRYRRL-EGG  
>Human\_K16  
EKVTMQNLNDRLANYLKVRLEEAANTSLEIKINEWYQKQGP----APD-RDYSSY--F  
RK-IEDLKNQILCASVENKLLLDIDNSKLTADDFRKYETELALCQVNEADINGLRQVL  
DQLTLARADLEMQIESLKEELAYLKNHEEEMNLR-GQT--GGDVSVSEVN-SPGDDL  
KVLLEMRQCYETMIENNRKEVEQWYERKMEVNVQVVCISSEKVEDCNOQVVDLKRQQLT  
LEIDLQAQLCLRESLQDSLGETECRYNTHLAEIQNQISLVEQQLAELRAEMECQNYREYR  
LLDVKTRLEQBIETRYRRL-EGG  
>Human\_K17  
EKATMQNLNDRLANYLQVCRLEEDENCQLEIWKIWEYQKHGDI----GPD-KDYSCY--Y  
QE-IDQLYNELFAETDDYINKIILNIDNTRMTAEDFKLYNTEAGLCKNVEADINGLRPLL  
DQLTLAKSDELMQFESLREELICLKNHEETLRLGLR-GQR--GHGDVSVSEVN-AAPGDDL  
KQRDLQRCYENIIEQNRKEVWYETKMEVVRQVSTSDQEIITSSNHQSELRRREYQT  
LEIELQSQISMIQSLQTNLEDTERRYNMQLQIQAMIEPVEGELASIRCEIESQNYEQYQ  
LLGIKTRLEQBIETRYRRL-EGG

LEIELQSQLSMKASLEGNLAETENRYCVQLSIIQGLIGSVEEQLAQRCEMEQQNQYEYKI  
LLDVKTRLEQEIATYRRL-EGE  
>Human\_K18  
EKETMQSLNDRSLASYLDRVRSLETENRRLESKIREHLEKKG-----PQV-RDWSHY--F  
KI-IEDLRAQIFANTVDNARIVLQIDNARLAADDFRKYETELAMRQSVENDIHLGRKVI  
DDTNI TRQLQEBTEALKEELFMKKNHEEVEKGLQ-AQI--ASSGLTVEVD-APKSDQL  
AKIMADIRAQYDELARKNREELDKYWSQQIEESTTVTTQSAEVAEAETTLTELRRTVQS  
LEIDLDSMRNLKASLENSLRVEARYALQMEQLNGILLHLESELAQTRAEGRQQAQYEYA  
LLNIKVKLEAEIATYRRLLEDGE  
>Human\_K19  
EKLTMQNLNDRSLASYLDRVRALEAANGELEVKIRDWYQKQGP----GPS-RDYSHY--Y  
TT-IDDLRDKILGATIENSRIVLQIDNARLAADDFRKFETEALRMSVEADINGLRRVL  
DELTLARTDLEMQIEGLKEELAYLKNHEEISTLR-GQV--GGQVSVVEVD-SAPGTDL  
AKILSDMRQSYEVMAEQNRKDAEAWFTSRTEELNREVAGHTEQLQMSRSEVTLRRLTQ  
LEIELQSQLSMKALEDITLAETEARFGAQLAHIQALISGIEAQLGDVRADSERQNYQR  
LMDIKSRLEQEIATYRSL-EGQ  
>Human\_K20  
EKMMQNLNDRSLASYLEKVRTLEQSNKLEVKIKQWYETNAP----RAG-RDYSAY--Y  
RQ-IEELRSQIKDAQLNARCVLQIDNARLAADDFRKYETERGI RLTV EADLQGLKNKVF  
DDLTLHKTDLEIQIEELNKDLALKKHQQEVDGLH-KHL--GNTVNVVEVD-AAPGLNL  
GVIMNEMRQYEVMAEQNLQEAKEQFERQAVLQVVTNTEELKGTVEVQLTELRRTSQS  
LEIELQSHLSMKESLEHTLEETKARYSSQLANLQSLSSLEAQLMQIRSNMERQNYEYHI  
LLDIKTRLEQEIATYRRL-EGE  
>Human\_K23  
GKATMQNLNDRSLASYLEKVRLEAANMKLESRIKWHQQRDP----GSK-KDYSQY--E  
EN-ITHLQEQIVDGKMTNAQIILLIDNARMAVDDFNKLYENEHSEFKKDLIEVEGLRRVL  
DNLTIVTTDLEQVEGMRKELILMKKHHEQEMEKHH-VPS--DFNVNVKVD-TGPREDL  
IKVLEDMRQYELI IKKHRDLDTWYKEQSAAMSQEAASPA-TVQSRQGDHILKRTFQA  
LEIDLQTYSTKSALENMLSETQSRYSCKLQDMQEIISHYEEELTQLRHLELRQNYEQV  
LLGIKTHLEKEIITTYRRL-EGE  
>Human\_K24  
EKQTMQNLNDRSLANYLDRVRALEAANTDLENKIKGWYKYGPGSGDGGSG-RDYSKY--Y  
SI-IEDLRNQIIAATVENAGIILLIDNARLAADDFRKYENELCLRQSV EADINGLRRVL  
DDLMTSRDLEMQIESFTEELAYLRKNHEEEMKMQ-GSS--GGEVTVMN-AAPGVDL  
TKLLNDRMQYEEALAEQNRRAEERFNKQASLQAIISTDAGAATSAKNETELKRTLQA  
LEIELQSQLAMKSLEGLTADTEAGYVAQLSEIQTIQIISALEEEICQIWGETKQNAEYKQ  
LLDIKTRLEVEIETYRRL-DGE  
>Human\_K25  
EKVTMQNLNDRSLASYLDSVHALEAANADLEQKIKGWYKFGPGSCR-GLD-HDYSRY--F  
PI-IDDLRKNQIIASATTSNANAVLQIDNARLAADDFRKYENELALHQSV EADINGLRRVL  
DEITLCRTDLEIQEYETLSEEMTYLKNHEEMQVLO-CAA--GGNVNVMN-AAPGVDL  
TVLLNMRQYEEALAEQNRRAEAWFNKQASLQAIISDVGATTSARNELTEMKRTLQT  
LEIELQSLLATKHSLECSLTETESNYCAQLAQIQAQIQAIGALEEQLHQVRTETEGQKLEYEQ  
LLDIKHLHLEKEIETYCLLI-GGD  
>Human\_K26  
EKVTMQNLNDRSLASYLDHVHALEAANADLEQKIKGWYKCEPGSSR-EHD-HDYSRY--F  
SV-IEDLRKQIIISATCNASIVLQIDNARLAADDFRKYENELALHHSVEADTSGLRRLVL  
DELTLCTDLEIQEYETLSEELTYLKKSHHEEMVLO-YTA--GGNVNVMN-ATPGVDL  
TVLLNMRQYEEALAEQNRRAEAWFNKQASLQAIISDGAATAARNELTELKRNLTQT  
LEIELQSLMAVKHSLECSLTETESNYCAQLAQIQAQIQAIGALEEQLHQVRTETEGQKLEYEQ  
LLDVKIFLEKEIDYCNLL-DGE  
>Human\_K27  
EKVTMQNLNDRSLASYLENVRALEAANADLEQKIKGWYKFGPGSCR-GLD-HDYSRY--F  
PI-IDELKNQIIISATTNANAVLQIDNARLAADDFRKYENELALHQSV EADINGLRRVL  
DELTLCTDLEIQEYETLSEELTYLKNHEEEMKALQ-CAA--GGNVNVMN-AAPGVDL  
TVLLNMRQYEEALAEQNRRAEAWFNKQASLQAIISDGAATTSARNELIEMKRTLQT  
LEIELQSLLATKHSLECSLTETESNYCAQLAQIQAQIQAIGALEEQLHQVRTETEGQKLEYEQ  
LLDIKVHLEKEIETYCLLI-DGE  
>Human\_K28  
EKVTMQNLNDRSLASYLDNVRALEAANAELERKIKGWYKYGPGSCR-GLD-HDYSRY--H  
LT-IEDLKNKIIISATTNANAVLQIDNARLAADDFRKYENELTLHQV EADINGLRRVL  
DELTLCTDLEIQEYETLSEEMTYLKNHEEEMKALQ-CAA--GGNVNVMN-AAPGVDL  
AVLLNMRQYEEALAEQNRRAEAWFNKQASLQAIISDGAATTSARNELIEMKRTLQT  
LEIQQLMATKHSLECSLTETESNYCAQLAQIQAQIQAIGALEEQLHQVRTETEGQKLEYEQ  
LLDVKVHLEKEIETYCRLLI-DGD  
>Human\_K31  
EKETMQFLNDRSLASYLEKVRQLERDNAELENLIRERSQQQEP----LLC-PSYQSY--F  
KT-IEELQKILCTKSENARLVVQIDNARLAADDFRKYETELSLRQLVESDINGLRRIL  
DELTLCKSDLEAQVESLKEELCLKNHEEVEVNTLR-CQL--GDRLNVEVD-AAPTVDL  
NRVLNEMRQYEEALVETNRRVEQWFTQTEELNKQVSSSEQLQSYQAEI IELRRTVNA  
LEIELQAQHNLRDSENLTLTESEARYSSQLSQVQLITNVESQLAEIRSDLERQNYEQV  
LLDVRARLECEINTYRSL-EGE  
>Human\_K32  
EKETMQFLNDRSLASYLTVRQLEQENAELESRIQEAHSQVVL----TMT-PDYQSH--F  
RT-IEELQKILCTKAENARLVVQIDNARLAADDFRKYAEALAMRQLVEADINGLRRIL  
DDLTLCKADLEAQVESLKEELCLKNHEEVEVNTLR-CQL--GDRLNVEVD-AAPTVDL  
TRVLEEMRQYEEAMVEANRRDVEWFMQMEELNQVATSSSEQLQNYQSDIIDLRRVTNT  
LEIELQAQHSRLDSENLTLTESEARYSSQLAQMQCMITNVEAQLAEIRADLERQNYEQV  
LLDVRARLECEINTYRSL-ENE  
>Human\_K33a  
EKETMQFLNDRSLASYLEKVRQLERDNAELENLIRERSQQQEP----LVC-ASYQSY--F  
KT-IEELQKILCSKSENARLVVQIDNARLAADDFRKYETELSLRQLVESDINGLRRIL  
DELTLCRSDLEAQVESLKEELCLKNHEEVEVNTLR-CQL--GDRLNVEVD-AAPTVDL  
NQVLNEMRQYEEALVETNRRVEQWFTQTEELNKQVSSSEQLQSYQAEI IELRRTVNA  
LEIELQAQHNLRDSENLTLTESEARYSSQLSQVQLITNVEAQLAEIRSDLERQNYEQV  
LLDVRARLECEINTYRSL-EGE  
>Human\_K33b  
EKETMQFLNDRSLASYLEKVRQLERDNAELENLIRERSQQQEP----LLC-PSYQSY--F  
KT-IEELQKILCSKSENARLVVQIDNARLAADDFRKYQTEQLRQLVESDINGLRRIL  
DELTLCRSDLEAQVESLKEELCLKNHEEVEVNTLR-CQL--GDRLNVEVD-AAPTVDL  
NQVLNEMRQYEEALVETNRRVEQWFTQTEELNKQVSSSEQLQSYQAEI IELRRTVNA  
LEIELQAQHNLRDSENLTLTESEARYSSQLSQVQLITNVEAQLAEIRSDLERQNYEQV  
LLDVRARLECEINTYRSL-EGE  
>Human\_K34  
EKETMQFLNDRSLASYLEKVRQLERDNAELENLIRERSQQQEP----LLC-PSYQSY--F  
KT-IEELQKILCAKAENARLVVQIDNARLAADDFRKYQTEQLRQLVESDINGLRRIL  
DELTLCKSDLESQVESLKEELCLKNHEEVEVNTLR-SQL--GDRLNVEVD-TAPTVDL  
NQVLNEMRQYEEALVETNRRVEQWFTQTEELNKQVSSSEQLQSYQAEI IELRRTVNA  
LEIELQAQHNLRDSENLTLTESEARYSSQLSQVQLITNVEAQLAEIRCDLERQNYEQV  
LLDVRARLECEINTYRSL-EGE  
>Human\_K35  
EKETMQSLNDRSLASYLEKVRQLEQENASLESRIREWCEQVQV----YMC-PDYQSY--F  
RT-IEELQKILCSKAENARLVVQIDNARLAADDFRKYETEVSLRQLVESDINGLRRIL  
DDLTLCKSDLEAQVESLKEELCLKNHEEVEVNTLR-CQL--GDRLNVEVD-AAPTVDL

```

NRVLEEMRCQYETLVENNRDAEDWLDTQSEELNQVVSSEQLQSCQAEIIELRRTVNA
LEIELQAQHSRMDALESTLAETEARYSQLAQMCMITNVEAQLAEIRADLERQNYEQV
LLDVARLECEINTYRGLL-ESE
>Human_K36
EKETMQFLNDRLANYLEKVRQLERENAELESRIQEWVEFQIP-----YIC-PDYQSY--F
KT-IEDFQQKILLTKSENARLVLQIDNAKLAADDFRKYETELSLRQLVEADINGLRRIL
DELTLCKADLEAQVESLKEELMCLKNHEEVSVLR-CQL---GDRLNVEVD-AAPPVDL
NKILEDMRCQYEAIVENNRDVEAWFNTQTEELNQVVSSEQLQCCQTEIIELRRTVNA
LEIELQAQHSRMRNSLESTLAETEARYSQLAQMQLISNVEAQLSEIRCDLERQNYEQV
LLDVKARLEGEIATYRHLL-EGE
>Human_K37
EKETMKFLNDRLANYLEKVRQLEQENAELETTLLERSKCHES-----TVC-PDYQSY--F
RT-IEELQQKILCSKAENARLIVQIDNAKLAADDFRIKLESERSLHQLVEADKCGTQKLL
DDATLAKADLEAQVESLKEEQSLKSNHEQEVKILR-SQL--GEKFRIELD-IEPTIDL
NRVLGEMRAQYEAIVETNHQDVEQWFQAQSEGISLQAMSCSEELQCCQSEIIELRCTVNA
LEVERQAQHTLKDCLQNSLCEAEDRYGTGLAQMQSLISNVEEQLSEIRADLERQNYEQV
LLDVKARLENEIATYRNLL-ESE
>Human_K38
EKETMQFLNDRLANYLEKVRQLEQENAELEATLLERSKCHES-----TVC-PDYQSY--F
HT-IEELQQKILCSKAENARLIVQIDNAKLAADDFRIKLESERSLHQLVEADKCGTQKLL
DDATLAKADLEAQVESLKEEQSLKSNHEQEVKILR-SQL--GEKRIELD-IEPTIDL
NRVLGEMRAQYEAIVETNRQDVEQWFQAQSEGISLQDMSCSEELQCCQSEIIELRCTVNA
LEVERQAQHTLKDCLQNSLCEAEDRFGTGLAQMQSLISNVEEQLSEIRADLERQNYEQV
LLDVKTRLENEIATYRNLL-ESE
>Human_K39
EKETMQILNDRLANYLQKVRMLERENAELESKIQEESNKELP-----VLC-PDYLSY--Y
TT-IEELQQKILCTKAENSRLVSDIDNTKLTADDLRAKYAEVSLRQLVESDANGLKQILL
NVLTGKADLEAQVSLKEELCLKNHKEEINSLQ-CQL---GERLDIEVT-AAPSADL
NQVLQEMRCQYEPIMETNRKDVQWFNTQIEELNQVVTSSQQCCQKEIIELRSSVNT
LEVELQAQHRMRDSQECILTEETEARYTALLTQIQSLIDNLEAQLAEIRCALERQNYEYI
LLDVKSRLCEIITTYRSLL-ESS
>Human_K40
EKETMQFLNDRLASYLEKVRSLLEETNAELESRIQEQQEQDIP-----MVC-PDYQRY--F
NT-IEDLQQKILCTKAENSRLAVQLDNCKLATDDFKSKYESELSLRQLLEADISSLHGIL
EELTLCKSDLEAHVESLKEEDLCLKNHKEEIVNLLR-EQL---GDRLSVELD-TAPTLDL
NRVLDEMRCQCEIVLANNRREAEEWLVAVQTEELNQQLSSAEQLQCCQMEILELKRRTASA
LEIELQAQQSLSLETVAETEAQYSSQLAQIQCLIDNLENQLAEIRCDLERQNYEQV
LLDVKARLEGEINTYWGLL-DSE

```

**Suppl. Fig. S14. Amino acid sequence alignment of the intermediate filament domains of keratins (type I and type II combined) used for the phylogenetic analysis shown in Supplementary Figure S5. The multiple sequence alignment is shown in fasta\_aln format.**
